# Supplementary material for: Beyond 5×10⁻⁸: MAF-Specific Significance Thresholds for Genome-Wide Association Studies in three major populations
Source: Research Square preprint supplement (doi:10.21203/rs.3.rs-6234338/v1), 2025-04-24
Supplement: Supplementary file 1 [file 270295fdc8d2289eaa55274f.xlsx]

## Sheet: ST1
Supplementary Table 1: Sample counts in 1000 Genomes populations.
Super Population	Sub Population	Sample Count	Population Description
AFR		661	African
	ACB	96	African Caribbean in Barbados
	ASW	61	African Ancestry in Southwest US
	ESN	99	Esan in Nigeria
	GWD	113	Gambian in Western Division, The Gambia
	LWK	99	Luhya in Webuye, Kenya
	MSL	85	Mende in Sierra Leone
	YRI	108	Yoruba in Ibadan, Nigeria
EUR	Total	503	European
	CEU	99	Utah residents with Northern and Western European ancestry
	FIN	99	Finnish in Finland
	GBR	91	British in England and Scotland
	IBS	107	Iberian populations in Spain
	TSI	107	Toscani in Italy
SAS	Total	489	South Asian
	BEB	86	Bengali in Bangladesh
	GIH	103	Gujarati Indian in Houston, TX
	ITU	102	Indian Telugu in the UK
	PJL	96	Punjabi in Lahore, Pakistan
	STU	102	Sri Lankan Tamil in the UK
EAS	Total	504	East Asian
	CDX	93	Chinese Dai in Xishuangbanna, China
	CHB	103	Han Chinese in Bejing, China
	CHS	105	Southern Han Chinese, China
	JPT	104	Japanese in Tokyo, Japan
	KHV	99	Kinh in Ho Chi Minh City, Vietnam

## Sheet: ST2a
Supplementary Table 2a: EUR population LD blocks using pre-computed cutoff points determined using Ldetect software
Chromosome	LD_Start	LD_End
chr1	10583	1892607
chr1	1892607	3582736
chr1	3582736	4380811
chr1	4380811	5913893
chr1	5913893	7247335
chr1	7247335	9365199
chr1	9365199	10806984
chr1	10806984	11777841
chr1	11777841	12779466
chr1	12779466	14891511
chr1	14891511	16897730
chr1	16897730	18662899
chr1	18662899	20469149
chr1	20469149	21736588
chr1	21736588	23086883
chr1	23086883	23920590
chr1	23920590	25516845
chr1	25516845	27401867
chr1	27401867	30161881
chr1	30161881	32438685
chr1	32438685	34799758
chr1	34799758	37549183
chr1	37549183	38731847
chr1	38731847	40200567
chr1	40200567	41975327
chr1	41975327	43758457
chr1	43758457	44969183
chr1	44969183	46899501
chr1	46899501	48002576
chr1	48002576	48978188
chr1	48978188	49894177
chr1	49894177	51713726
chr1	51713726	54226262
chr1	54226262	56413117
chr1	56413117	57021728
chr1	57021728	58865399
chr1	58865399	59890409
chr1	59890409	61922365
chr1	61922365	63455089
chr1	63455089	65041704
chr1	65041704	66939404
chr1	66939404	68477895
chr1	68477895	69687616
chr1	69687616	71372470
chr1	71372470	71684405
chr1	71684405	74326907
chr1	74326907	76728135
chr1	76728135	79661198
chr1	79661198	81354191
chr1	81354191	83991748
chr1	83991748	84844495
chr1	84844495	86454751
chr1	86454751	88128631
chr1	88128631	90066303
chr1	90066303	91886317
chr1	91886317	93536459
chr1	93536459	94506191
chr1	94506191	96150893
chr1	96150893	97885249
chr1	97885249	99800604
chr1	99800604	100826405
chr1	100826405	102041016
chr1	102041016	102898745
chr1	102898745	103914211
chr1	103914211	106087842
chr1	106087842	108409665
chr1	108409665	110303931
chr1	110303931	111741737
chr1	111741737	113273306
chr1	113273306	114873845
chr1	114873845	115880593
chr1	115880593	118839067
chr1	118839067	144977494
chr1	144977494	148361253
chr1	148361253	151538881
chr1	151538881	153180829
chr1	153180829	154770403
chr1	154770403	156336133
chr1	156336133	158027412
chr1	158027412	159913048
chr1	159913048	162346721
chr1	162346721	165191702
chr1	165191702	166460517
chr1	166460517	169086324
chr1	169086324	170557776
chr1	170557776	173097907
chr1	173097907	175089768
chr1	175089768	177433381
chr1	177433381	178944309
chr1	178944309	178954470
chr1	178954470	181144121
chr1	181144121	182755356
chr1	182755356	184595513
chr1	184595513	186810023
chr1	186810023	188759945
chr1	188759945	189904130
chr1	189904130	191868930
chr1	191868930	194107442
chr1	194107442	196176201
chr1	196176201	197311514
chr1	197311514	199239884
chr1	199239884	200137649
chr1	200137649	201589975
chr1	201589975	203334734
chr1	203334734	204681068
chr1	204681068	206073265
chr1	206073265	208410364
chr1	208410364	210787750
chr1	210787750	212842330
chr1	212842330	214578266
chr1	214578266	216243634
chr1	216243634	218705513
chr1	218705513	219590571
chr1	219590571	221858231
chr1	221858231	222230220
chr1	222230220	224938520
chr1	224938520	226810860
chr1	226810860	229156248
chr1	229156248	230685255
chr1	230685255	232090252
chr1	232090252	233429284
chr1	233429284	234599434
chr1	234599434	235819436
chr1	235819436	237555628
chr1	237555628	238567807
chr1	238567807	239925314
chr1	239925314	240564091
chr1	240564091	241582220
chr1	241582220	242071602
chr1	242071602	244109499
chr1	244109499	245506746
chr1	245506746	247344518
chr1	247344518	249239466
chr2	10133	1781022
chr2	1781022	3973779
chr2	3973779	5708337
chr2	5708337	6836254
chr2	6836254	8422147
chr2	8422147	10298469
chr2	10298469	12419150
chr2	12419150	14335308
chr2	14335308	16329735
chr2	16329735	18647423
chr2	18647423	19692404
chr2	19692404	21050490
chr2	21050490	23341383
chr2	23341383	24686918
chr2	24686918	26894985
chr2	26894985	28598777
chr2	28598777	29217559
chr2	29217559	30463711
chr2	30463711	31550450
chr2	31550450	33363777
chr2	33363777	35345028
chr2	35345028	36122006
chr2	36122006	38132712
chr2	38132712	39031337
chr2	39031337	40281483
chr2	40281483	43309590
chr2	43309590	44313803
chr2	44313803	46482634
chr2	46482634	47318772
chr2	47318772	48213001
chr2	48213001	50022257
chr2	50022257	50818928
chr2	50818928	52491133
chr2	52491133	53508452
chr2	53508452	54685226
chr2	54685226	56203345
chr2	56203345	57429100
chr2	57429100	58297315
chr2	58297315	60292000
chr2	60292000	62429044
chr2	62429044	64625913
chr2	64625913	65933444
chr2	65933444	67226166
chr2	67226166	68010176
chr2	68010176	69139564
chr2	69139564	70755198
chr2	70755198	73174848
chr2	73174848	75630086
chr2	75630086	76913661
chr2	76913661	78079264
chr2	78079264	80050403
chr2	80050403	81620841
chr2	81620841	85140680
chr2	85140680	88038507
chr2	88038507	89154526
chr2	89154526	95326452
chr2	95326452	98995201
chr2	98995201	101822329
chr2	101822329	102688765
chr2	102688765	103588215
chr2	103588215	105125034
chr2	105125034	106210058
chr2	106210058	107408267
chr2	107408267	108429177
chr2	108429177	110572432
chr2	110572432	113921856
chr2	113921856	116772470
chr2	116772470	118367466
chr2	118367466	121303783
chr2	121303783	123302906
chr2	123302906	124732250
chr2	124732250	125840921
chr2	125840921	127373764
chr2	127373764	128034347
chr2	128034347	129474441
chr2	129474441	130067170
chr2	130067170	130658085
chr2	130658085	133042784
chr2	133042784	135158578
chr2	135158578	137042794
chr2	137042794	138698117
chr2	138698117	140100271
chr2	140100271	141805351
chr2	141805351	142518602
chr2	142518602	144519484
chr2	144519484	146445570
chr2	146445570	147277162
chr2	147277162	150210292
chr2	150210292	151731462
chr2	151731462	152486782
chr2	152486782	154005056
chr2	154005056	155391135
chr2	155391135	157560635
chr2	157560635	158533218
chr2	158533218	159577082
chr2	159577082	161769733
chr2	161769733	163503551
chr2	163503551	164466638
chr2	164466638	165178840
chr2	165178840	167160270
chr2	167160270	167355970
chr2	167355970	169968236
chr2	169968236	171226245
chr2	171226245	173138905
chr2	173138905	175588929
chr2	175588929	177363636
chr2	177363636	178553183
chr2	178553183	181312739
chr2	181312739	182266031
chr2	182266031	184357608
chr2	184357608	185280173
chr2	185280173	189882065
chr2	189882065	191973357
chr2	191973357	195861164
chr2	195861164	196447456
chr2	196447456	198078110
chr2	198078110	199311125
chr2	199311125	201576284
chr2	201576284	202818637
chr2	202818637	205799241
chr2	205799241	206735704
chr2	206735704	208645399
chr2	208645399	209941529
chr2	209941529	212379518
chr2	212379518	214014282
chr2	214014282	215573795
chr2	215573795	217715661
chr2	217715661	218395480
chr2	218395480	220454551
chr2	220454551	222521176
chr2	222521176	224859419
chr2	224859419	225840004
chr2	225840004	228119842
chr2	228119842	229370787
chr2	229370787	231843389
chr2	231843389	233550003
chr2	233550003	235150987
chr2	235150987	236043550
chr2	236043550	237449032
chr2	237449032	238760981
chr2	238760981	239952643
chr2	239952643	241560084
chr2	241560084	242149921
chr2	242149921	243188920
chr3	60157	1441779
chr3	1441779	2992120
chr3	2992120	4431647
chr3	4431647	6083183
chr3	6083183	7083387
chr3	7083387	8648561
chr3	8648561	9543183
chr3	9543183	11019665
chr3	11019665	13070799
chr3	13070799	14816900
chr3	14816900	16282442
chr3	16282442	17891118
chr3	17891118	19125144
chr3	19125144	20091348
chr3	20091348	21643707
chr3	21643707	22204244
chr3	22204244	23804865
chr3	23804865	25461558
chr3	25461558	26877769
chr3	26877769	27840910
chr3	27840910	29142260
chr3	29142260	30717955
chr3	30717955	32351715
chr3	32351715	33255592
chr3	33255592	35283458
chr3	35283458	36486842
chr3	36486842	38356116
chr3	38356116	40221298
chr3	40221298	41064528
chr3	41064528	42540002
chr3	42540002	45165153
chr3	45165153	46657500
chr3	46657500	47727212
chr3	47727212	49316972
chr3	49316972	51832015
chr3	51832015	54081390
chr3	54081390	55348860
chr3	55348860	56433907
chr3	56433907	58157519
chr3	58157519	60272906
chr3	60272906	62355666
chr3	62355666	63669286
chr3	63669286	65273538
chr3	65273538	66270447
chr3	66270447	68286914
chr3	68286914	69276762
chr3	69276762	70449028
chr3	70449028	72529329
chr3	72529329	74321817
chr3	74321817	75704949
chr3	75704949	77508835
chr3	77508835	79024541
chr3	79024541	81427310
chr3	81427310	82643886
chr3	82643886	84367479
chr3	84367479	85582231
chr3	85582231	87409732
chr3	87409732	88298373
chr3	88298373	94255316
chr3	94255316	95311971
chr3	95311971	98215950
chr3	98215950	99373762
chr3	99373762	100592217
chr3	100592217	103084960
chr3	103084960	104581613
chr3	104581613	106982811
chr3	106982811	109522395
chr3	109522395	110513770
chr3	110513770	112815699
chr3	112815699	113947863
chr3	113947863	115447080
chr3	115447080	116800153
chr3	116800153	118530251
chr3	118530251	120523055
chr3	120523055	121974097
chr3	121974097	123517768
chr3	123517768	124936642
chr3	124936642	126214943
chr3	126214943	128194861
chr3	128194861	130244735
chr3	130244735	131836516
chr3	131836516	133252173
chr3	133252173	135456906
chr3	135456906	137371083
chr3	137371083	139954597
chr3	139954597	141339097
chr3	141339097	143164628
chr3	143164628	144410816
chr3	144410816	145664619
chr3	145664619	146726629
chr3	146726629	149043237
chr3	149043237	150252004
chr3	150252004	151348730
chr3	151348730	153256571
chr3	153256571	154714218
chr3	154714218	156008700
chr3	156008700	157312028
chr3	157312028	159477890
chr3	159477890	161524504
chr3	161524504	163253205
chr3	163253205	165055469
chr3	165055469	167117429
chr3	167117429	168580960
chr3	168580960	170964909
chr3	170964909	172295731
chr3	172295731	173477285
chr3	173477285	175116539
chr3	175116539	176320287
chr3	176320287	178107165
chr3	178107165	179374586
chr3	179374586	181511166
chr3	181511166	183769683
chr3	183769683	185068255
chr3	185068255	186890344
chr3	186890344	188856214
chr3	188856214	190226607
chr3	190226607	192343814
chr3	192343814	194059671
chr3	194059671	194786674
chr3	194786674	195971408
chr3	195971408	197075987
chr3	197075987	197946622
chr4	10240	694715
chr4	694715	1478711
chr4	1478711	2842979
chr4	2842979	3846040
chr4	3846040	4684116
chr4	4684116	5502388
chr4	5502388	6773043
chr4	6773043	7539692
chr4	7539692	8152235
chr4	8152235	9326479
chr4	9326479	10699152
chr4	10699152	12323034
chr4	12323034	14272001
chr4	14272001	15147446
chr4	15147446	15927009
chr4	15927009	17383322
chr4	17383322	18841874
chr4	18841874	20544557
chr4	20544557	22319347
chr4	22319347	24135529
chr4	24135529	25609322
chr4	25609322	27343722
chr4	27343722	27965868
chr4	27965868	29762208
chr4	29762208	30454535
chr4	30454535	31782981
chr4	31782981	33172766
chr4	33172766	35151415
chr4	35151415	36020436
chr4	36020436	37255047
chr4	37255047	38907022
chr4	38907022	40202609
chr4	40202609	42213058
chr4	42213058	43965045
chr4	43965045	45189157
chr4	45189157	47411896
chr4	47411896	48123600
chr4	48123600	53877433
chr4	53877433	55429556
chr4	55429556	56547644
chr4	56547644	58935008
chr4	58935008	60741087
chr4	60741087	62371763
chr4	62371763	64341001
chr4	64341001	66600492
chr4	66600492	68059497
chr4	68059497	68854765
chr4	68854765	71049152
chr4	71049152	72140558
chr4	72140558	74592390
chr4	74592390	77130707
chr4	77130707	79093979
chr4	79093979	80990297
chr4	80990297	82125315
chr4	82125315	83372593
chr4	83372593	84799656
chr4	84799656	86930609
chr4	86930609	87534648
chr4	87534648	89238028
chr4	89238028	90231564
chr4	90231564	91560677
chr4	91560677	94233299
chr4	94233299	96182188
chr4	96182188	97540703
chr4	97540703	99424067
chr4	99424067	100678360
chr4	100678360	103221356
chr4	103221356	105305294
chr4	105305294	107501305
chr4	107501305	108815348
chr4	108815348	111256567
chr4	111256567	113870102
chr4	113870102	115666246
chr4	115666246	117276929
chr4	117276929	118479918
chr4	118479918	119933512
chr4	119933512	120392684
chr4	120392684	122657987
chr4	122657987	124286481
chr4	124286481	125210862
chr4	125210862	126480886
chr4	126480886	127275477
chr4	127275477	127830293
chr4	127830293	128996665
chr4	128996665	130591885
chr4	130591885	131283821
chr4	131283821	132954033
chr4	132954033	134628434
chr4	134628434	136566407
chr4	136566407	138541971
chr4	138541971	139556511
chr4	139556511	141084631
chr4	141084631	143443265
chr4	143443265	146178187
chr4	146178187	148521873
chr4	148521873	150683580
chr4	150683580	152782184
chr4	152782184	154477641
chr4	154477641	155056126
chr4	155056126	157485097
chr4	157485097	158743718
chr4	158743718	161058864
chr4	161058864	161826435
chr4	161826435	163243679
chr4	163243679	164478234
chr4	164478234	165823448
chr4	165823448	167018858
chr4	167018858	167852917
chr4	167852917	169676825
chr4	169676825	170776510
chr4	170776510	172558635
chr4	172558635	174264132
chr4	174264132	176570716
chr4	176570716	178991910
chr4	178991910	180122043
chr4	180122043	182066807
chr4	182066807	183371275
chr4	183371275	184929455
chr4	184929455	186909090
chr4	186909090	188472981
chr4	188472981	189693511
chr4	189693511	191043594
chr5	11940	982252
chr5	982252	2132442
chr5	2132442	3361941
chr5	3361941	4632110
chr5	4632110	5973233
chr5	5973233	7143218
chr5	7143218	8446336
chr5	8446336	9718832
chr5	9718832	11173271
chr5	11173271	13464832
chr5	13464832	14757804
chr5	14757804	16963613
chr5	16963613	18051592
chr5	18051592	19917716
chr5	19917716	22152073
chr5	22152073	23494324
chr5	23494324	26184851
chr5	26184851	26857604
chr5	26857604	27984513
chr5	27984513	29714820
chr5	29714820	31390249
chr5	31390249	33500180
chr5	33500180	35048970
chr5	35048970	36433954
chr5	36433954	38802410
chr5	38802410	40287729
chr5	40287729	41888710
chr5	41888710	43983499
chr5	43983499	50163398
chr5	50163398	52134622
chr5	52134622	53703044
chr5	53703044	55417349
chr5	55417349	56621102
chr5	56621102	57340073
chr5	57340073	58524622
chr5	58524622	60935907
chr5	60935907	61672995
chr5	61672995	63218987
chr5	63218987	63968304
chr5	63968304	65911286
chr5	65911286	67850860
chr5	67850860	71240456
chr5	71240456	73759326
chr5	73759326	75798866
chr5	75798866	77623332
chr5	77623332	79393144
chr5	79393144	80481471
chr5	80481471	82025648
chr5	82025648	83972689
chr5	83972689	85767290
chr5	85767290	87389991
chr5	87389991	88891530
chr5	88891530	90422654
chr5	90422654	91840542
chr5	91840542	93809984
chr5	93809984	95963519
chr5	95963519	97315601
chr5	97315601	99260992
chr5	99260992	101578769
chr5	101578769	103320005
chr5	103320005	104851483
chr5	104851483	105893055
chr5	105893055	107264196
chr5	107264196	108633934
chr5	108633934	110821144
chr5	110821144	111981562
chr5	111981562	113396285
chr5	113396285	114830370
chr5	114830370	115831047
chr5	115831047	117346213
chr5	117346213	118608820
chr5	118608820	119669042
chr5	119669042	120452166
chr5	120452166	122556905
chr5	122556905	123798100
chr5	123798100	125785649
chr5	125785649	127344604
chr5	127344604	129519025
chr5	129519025	132139649
chr5	132139649	134777401
chr5	134777401	136376050
chr5	136376050	139265072
chr5	139265072	140645971
chr5	140645971	142981248
chr5	142981248	144943354
chr5	144943354	147181998
chr5	147181998	148662624
chr5	148662624	150561298
chr5	150561298	152867774
chr5	152867774	153773088
chr5	153773088	155373505
chr5	155373505	156628700
chr5	156628700	158825698
chr5	158825698	159973944
chr5	159973944	161482133
chr5	161482133	162743908
chr5	162743908	163771582
chr5	163771582	165642395
chr5	165642395	166847740
chr5	166847740	168525318
chr5	168525318	169505664
chr5	169505664	171074292
chr5	171074292	172678327
chr5	172678327	173642871
chr5	173642871	175450595
chr5	175450595	177251507
chr5	177251507	178413464
chr5	178413464	179401244
chr5	179401244	180559933
chr5	180559933	180885156
chr6	73924	1452362
chr6	1452362	2458936
chr6	2458936	3573593
chr6	3573593	4617817
chr6	4617817	5791472
chr6	5791472	6785207
chr6	6785207	7808936
chr6	7808936	9020026
chr6	9020026	10540317
chr6	10540317	11790816
chr6	11790816	13209388
chr6	13209388	14802924
chr6	14802924	17386405
chr6	17386405	19207487
chr6	19207487	21684065
chr6	21684065	22748307
chr6	22748307	23936619
chr6	23936619	24852275
chr6	24852275	25684587
chr6	25684587	26791233
chr6	26791233	28017819
chr6	28017819	28917608
chr6	28917608	29737971
chr6	29737971	30798168
chr6	30798168	31571218
chr6	31571218	32682664
chr6	32682664	33236497
chr6	33236497	35455756
chr6	35455756	37572596
chr6	37572596	39295677
chr6	39295677	40345115
chr6	40345115	42038721
chr6	42038721	43756169
chr6	43756169	45406563
chr6	45406563	47311898
chr6	47311898	48391125
chr6	48391125	50386145
chr6	50386145	52210476
chr6	52210476	53279102
chr6	53279102	55468270
chr6	55468270	56105313
chr6	56105313	57599465
chr6	57599465	61880512
chr6	61880512	63552888
chr6	63552888	65765742
chr6	65765742	67329215
chr6	67329215	68849483
chr6	68849483	69523448
chr6	69523448	71609510
chr6	71609510	73450097
chr6	73450097	75462003
chr6	75462003	77414881
chr6	77414881	78957728
chr6	78957728	80691170
chr6	80691170	81929222
chr6	81929222	83127149
chr6	83127149	85209989
chr6	85209989	87069500
chr6	87069500	88822140
chr6	88822140	89973052
chr6	89973052	91843196
chr6	91843196	93428644
chr6	93428644	94118142
chr6	94118142	94441175
chr6	94441175	97093511
chr6	97093511	97842284
chr6	97842284	100630146
chr6	100630146	102636772
chr6	102636772	103983395
chr6	103983395	106056733
chr6	106056733	107450306
chr6	107450306	108464380
chr6	108464380	110304247
chr6	110304247	112345014
chr6	112345014	114220833
chr6	114220833	116131396
chr6	116131396	117672972
chr6	117672972	118963115
chr6	118963115	119963278
chr6	119963278	120512128
chr6	120512128	121905676
chr6	121905676	123856181
chr6	123856181	125424383
chr6	125424383	127540461
chr6	127540461	129861031
chr6	129861031	130935454
chr6	130935454	132765669
chr6	132765669	134244243
chr6	134244243	136224177
chr6	136224177	137614218
chr6	137614218	138822629
chr6	138822629	139845436
chr6	139845436	142288479
chr6	142288479	145319810
chr6	145319810	146665424
chr6	146665424	148920352
chr6	148920352	150253404
chr6	150253404	151912703
chr6	151912703	153094496
chr6	153094496	154974120
chr6	154974120	156763326
chr6	156763326	158218719
chr6	158218719	160580497
chr6	160580497	162169564
chr6	162169564	162931203
chr6	162931203	164383521
chr6	164383521	165586864
chr6	165586864	167024733
chr6	167024733	168042835
chr6	168042835	169382050
chr6	169382050	170330173
chr6	170330173	171051270
chr7	16161	972752
chr7	972752	1353067
chr7	1353067	2062398
chr7	2062398	2772227
chr7	2772227	4573428
chr7	4573428	5416232
chr7	5416232	5854526
chr7	5854526	6573857
chr7	6573857	7808752
chr7	7808752	9123423
chr7	9123423	9987499
chr7	9987499	11299198
chr7	11299198	12635461
chr7	12635461	13884202
chr7	13884202	15143657
chr7	15143657	16902069
chr7	16902069	19481547
chr7	19481547	20124908
chr7	20124908	22507629
chr7	22507629	23471442
chr7	23471442	25077259
chr7	25077259	25909555
chr7	25909555	28360309
chr7	28360309	31137289
chr7	31137289	33555768
chr7	33555768	36213538
chr7	36213538	37555184
chr7	37555184	38966703
chr7	38966703	39862670
chr7	39862670	42001811
chr7	42001811	43159074
chr7	43159074	44763828
chr7	44763828	45952922
chr7	45952922	46986720
chr7	46986720	49212278
chr7	49212278	51675322
chr7	51675322	53176312
chr7	53176312	54222976
chr7	54222976	55691584
chr7	55691584	57382638
chr7	57382638	63307359
chr7	63307359	63641125
chr7	63641125	65689809
chr7	65689809	68234074
chr7	68234074	69085364
chr7	69085364	71874885
chr7	71874885	73334602
chr7	73334602	76458564
chr7	76458564	78093859
chr7	78093859	79888069
chr7	79888069	82022686
chr7	82022686	83801203
chr7	83801203	85572182
chr7	85572182	87825004
chr7	87825004	90661784
chr7	90661784	92493752
chr7	92493752	93966601
chr7	93966601	96073508
chr7	96073508	97099570
chr7	97099570	98715474
chr7	98715474	100196651
chr7	100196651	101199253
chr7	101199253	103197510
chr7	103197510	104159525
chr7	104159525	105682905
chr7	105682905	107780178
chr7	107780178	109647594
chr7	109647594	112618684
chr7	112618684	113712387
chr7	113712387	116780178
chr7	116780178	118351581
chr7	118351581	121045273
chr7	121045273	121933630
chr7	121933630	124156805
chr7	124156805	124167552
chr7	124167552	126519170
chr7	126519170	126869221
chr7	126869221	128778386
chr7	128778386	130422414
chr7	130422414	132805848
chr7	132805848	134307596
chr7	134307596	135591083
chr7	135591083	136876562
chr7	136876562	138744679
chr7	138744679	139933177
chr7	139933177	140235210
chr7	140235210	141226557
chr7	141226557	142656310
chr7	142656310	144968289
chr7	144968289	146427960
chr7	146427960	147815318
chr7	147815318	149840658
chr7	149840658	150711505
chr7	150711505	152249806
chr7	152249806	153674019
chr7	153674019	154964730
chr7	154964730	156065250
chr7	156065250	157634597
chr7	157634597	159128575
chr8	10422	1044217
chr8	1044217	1163245
chr8	1163245	2042942
chr8	2042942	2573279
chr8	2573279	3392926
chr8	3392926	3783017
chr8	3783017	4480476
chr8	4480476	5146927
chr8	5146927	6142797
chr8	6142797	7153079
chr8	7153079	9154694
chr8	9154694	9640787
chr8	9640787	10463197
chr8	10463197	11278998
chr8	11278998	13491775
chr8	13491775	13944992
chr8	13944992	15991660
chr8	15991660	17387876
chr8	17387876	17836399
chr8	17836399	19492840
chr8	19492840	20060856
chr8	20060856	21661737
chr8	21661737	22897057
chr8	22897057	24674718
chr8	24674718	25483454
chr8	25483454	26682525
chr8	26682525	28162392
chr8	28162392	29327896
chr8	29327896	31133729
chr8	31133729	31548360
chr8	31548360	32977218
chr8	32977218	35317232
chr8	35317232	37379389
chr8	37379389	38938806
chr8	38938806	40703337
chr8	40703337	41721454
chr8	41721454	42773823
chr8	42773823	46841315
chr8	46841315	50082470
chr8	50082470	53302930
chr8	53302930	54418044
chr8	54418044	55945581
chr8	55945581	56956383
chr8	56956383	59068651
chr8	59068651	59728100
chr8	59728100	62329099
chr8	62329099	63349306
chr8	63349306	65232872
chr8	65232872	66489090
chr8	66489090	69863057
chr8	69863057	70867979
chr8	70867979	72289454
chr8	72289454	73817199
chr8	73817199	75445064
chr8	75445064	76456542
chr8	76456542	79132861
chr8	79132861	81956395
chr8	81956395	82693739
chr8	82693739	84225589
chr8	84225589	85955619
chr8	85955619	87411709
chr8	87411709	89085481
chr8	89085481	90638162
chr8	90638162	93554386
chr8	93554386	95005527
chr8	95005527	96534806
chr8	96534806	99401581
chr8	99401581	101620958
chr8	101620958	104123306
chr8	104123306	104988752
chr8	104988752	107410754
chr8	107410754	108648177
chr8	108648177	109248173
chr8	109248173	110484314
chr8	110484314	111850847
chr8	111850847	113064320
chr8	113064320	116096495
chr8	116096495	119685457
chr8	119685457	121201700
chr8	121201700	124861459
chr8	124861459	125683719
chr8	125683719	126410917
chr8	126410917	128659111
chr8	128659111	130381139
chr8	130381139	131639625
chr8	131639625	133351144
chr8	133351144	134570001
chr8	134570001	136035605
chr8	136035605	137524151
chr8	137524151	139254830
chr8	139254830	140725643
chr8	140725643	143044914
chr8	143044914	144236881
chr8	144236881	146303867
chr9	10023	1079707
chr9	1079707	1916877
chr9	1916877	3190064
chr9	3190064	4495328
chr9	4495328	4884926
chr9	4884926	6557589
chr9	6557589	7154923
chr9	7154923	8456299
chr9	8456299	9166403
chr9	9166403	10879253
chr9	10879253	12276489
chr9	12276489	14836363
chr9	14836363	16659655
chr9	16659655	18661051
chr9	18661051	20463534
chr9	20463534	22206559
chr9	22206559	24158518
chr9	24158518	25330810
chr9	25330810	26111757
chr9	26111757	28224283
chr9	28224283	28811584
chr9	28811584	30387392
chr9	30387392	31310383
chr9	31310383	32019368
chr9	32019368	33578334
chr9	33578334	34642243
chr9	34642243	36743283
chr9	36743283	38641599
chr9	38641599	65472190
chr9	65472190	72512711
chr9	72512711	72753755
chr9	72753755	74253040
chr9	74253040	76203946
chr9	76203946	76973081
chr9	76973081	78900183
chr9	78900183	79471208
chr9	79471208	81079055
chr9	81079055	82590928
chr9	82590928	84211233
chr9	84211233	85440801
chr9	85440801	86938196
chr9	86938196	88109333
chr9	88109333	88590417
chr9	88590417	90136246
chr9	90136246	92528698
chr9	92528698	94167203
chr9	94167203	96671698
chr9	96671698	98922040
chr9	98922040	101592859
chr9	101592859	104624437
chr9	104624437	105967976
chr9	105967976	107581749
chr9	107581749	109298754
chr9	109298754	110695062
chr9	110695062	112778024
chr9	112778024	114831082
chr9	114831082	115693145
chr9	115693145	117019801
chr9	117019801	117921960
chr9	117921960	121321537
chr9	121321537	122260297
chr9	122260297	124871322
chr9	124871322	126971887
chr9	126971887	129059665
chr9	129059665	130055510
chr9	130055510	132165470
chr9	132165470	133223217
chr9	133223217	134127888
chr9	134127888	135298842
chr9	135298842	137041122
chr9	137041122	137589364
chr9	137589364	138938978
chr9	138938978	139500342
chr9	139500342	141144796
chr10	60523	751339
chr10	751339	1523544
chr10	1523544	2254500
chr10	2254500	3352699
chr10	3352699	4572274
chr10	4572274	5983762
chr10	5983762	7171484
chr10	7171484	8774665
chr10	8774665	10249396
chr10	10249396	12586797
chr10	12586797	13321600
chr10	13321600	15026068
chr10	15026068	16551767
chr10	16551767	18537267
chr10	18537267	19716878
chr10	19716878	22772283
chr10	22772283	23175132
chr10	23175132	25578596
chr10	25578596	26888684
chr10	26888684	29323236
chr10	29323236	29783692
chr10	29783692	30458838
chr10	30458838	31907519
chr10	31907519	33707968
chr10	33707968	35109355
chr10	35109355	36572508
chr10	36572508	37790029
chr10	37790029	42372579
chr10	42372579	43894771
chr10	43894771	44730075
chr10	44730075	48760450
chr10	48760450	50840915
chr10	50840915	53616629
chr10	53616629	55103572
chr10	55103572	57031140
chr10	57031140	57662146
chr10	57662146	58959528
chr10	58959528	60289987
chr10	60289987	61891409
chr10	61891409	62659679
chr10	62659679	63341695
chr10	63341695	65794114
chr10	65794114	67549615
chr10	67549615	69900148
chr10	69900148	70195991
chr10	70195991	72220850
chr10	72220850	73508512
chr10	73508512	75422550
chr10	75422550	78706814
chr10	78706814	80876749
chr10	80876749	82414679
chr10	82414679	84383745
chr10	84383745	85458703
chr10	85458703	87937577
chr10	87937577	89127064
chr10	89127064	91013381
chr10	91013381	92006581
chr10	92006581	93335047
chr10	93335047	95396368
chr10	95396368	96221243
chr10	96221243	97822357
chr10	97822357	100241302
chr10	100241302	100668400
chr10	100668400	102949239
chr10	102949239	104380410
chr10	104380410	106695048
chr10	106695048	108726686
chr10	108726686	110317705
chr10	110317705	112561493
chr10	112561493	115328432
chr10	115328432	116421406
chr10	116421406	119523934
chr10	119523934	120591353
chr10	120591353	122407323
chr10	122407323	123231465
chr10	123231465	123900545
chr10	123900545	125869346
chr10	125869346	128001098
chr10	128001098	129154362
chr10	129154362	130844284
chr10	130844284	131741327
chr10	131741327	132580245
chr10	132580245	134336329
chr10	134336329	134494673
chr10	134494673	135523865
chr11	70855	1213590
chr11	1213590	3665481
chr11	3665481	4746709
chr11	4746709	6322869
chr11	6322869	7436701
chr11	7436701	8333274
chr11	8333274	9087317
chr11	9087317	10952027
chr11	10952027	12564229
chr11	12564229	13373124
chr11	13373124	15742552
chr11	15742552	17578402
chr11	17578402	19569535
chr11	19569535	21017138
chr11	21017138	22374142
chr11	22374142	24088517
chr11	24088517	26045753
chr11	26045753	27020461
chr11	27020461	28481593
chr11	28481593	30141357
chr11	30141357	32276901
chr11	32276901	33958739
chr11	33958739	35502605
chr11	35502605	37116815
chr11	37116815	39382003
chr11	39382003	42310003
chr11	42310003	44693799
chr11	44693799	47006137
chr11	47006137	49866050
chr11	49866050	54695473
chr11	54695473	55082657
chr11	55082657	58457495
chr11	58457495	58780549
chr11	58780549	62223771
chr11	62223771	63804569
chr11	63804569	65898631
chr11	65898631	68005825
chr11	68005825	69516130
chr11	69516130	70926292
chr11	70926292	72286017
chr11	72286017	74412351
chr11	74412351	76797209
chr11	76797209	78355058
chr11	78355058	80722373
chr11	80722373	81266712
chr11	81266712	84381272
chr11	84381272	86619301
chr11	86619301	87430235
chr11	87430235	89208936
chr11	89208936	90966490
chr11	90966490	92077144
chr11	92077144	93276157
chr11	93276157	94242260
chr11	94242260	95726041
chr11	95726041	97057058
chr11	97057058	98705065
chr11	98705065	100417169
chr11	100417169	101331121
chr11	101331121	103959636
chr11	103959636	104873284
chr11	104873284	106520894
chr11	106520894	107844200
chr11	107844200	108437037
chr11	108437037	109866116
chr11	109866116	111114397
chr11	111114397	112459488
chr11	112459488	114257728
chr11	114257728	114830666
chr11	114830666	116383348
chr11	116383348	117747110
chr11	117747110	119215476
chr11	119215476	120766806
chr11	120766806	121175943
chr11	121175943	122591910
chr11	122591910	123500117
chr11	123500117	124495528
chr11	124495528	126311320
chr11	126311320	127316679
chr11	127316679	128188537
chr11	128188537	130342575
chr11	130342575	131074612
chr11	131074612	133000046
chr11	133000046	134205993
chr11	134205993	134946452
chr12	61107	1080331
chr12	1080331	2544786
chr12	2544786	3677037
chr12	3677037	4417679
chr12	4417679	5321472
chr12	5321472	6419753
chr12	6419753	8377536
chr12	8377536	9031395
chr12	9031395	10481534
chr12	10481534	11754846
chr12	11754846	12733528
chr12	12733528	15241484
chr12	15241484	16310460
chr12	16310460	18087873
chr12	18087873	20863943
chr12	20863943	23820634
chr12	23820634	25371083
chr12	25371083	27799773
chr12	27799773	29651255
chr12	29651255	30512406
chr12	30512406	32165592
chr12	32165592	33076989
chr12	33076989	37856717
chr12	37856717	39227169
chr12	39227169	40816185
chr12	40816185	41658586
chr12	41658586	43984474
chr12	43984474	46024229
chr12	46024229	47714793
chr12	47714793	49001866
chr12	49001866	51776494
chr12	51776494	53039004
chr12	53039004	54778823
chr12	54778823	55665837
chr12	55665837	57548860
chr12	57548860	59308666
chr12	59308666	61123729
chr12	61123729	64032461
chr12	64032461	65559695
chr12	65559695	67181144
chr12	67181144	67909729
chr12	67909729	69826542
chr12	69826542	70957987
chr12	70957987	72645075
chr12	72645075	73818454
chr12	73818454	76511314
chr12	76511314	78570570
chr12	78570570	80448150
chr12	80448150	81467767
chr12	81467767	83502666
chr12	83502666	84303844
chr12	84303844	85990426
chr12	85990426	89682122
chr12	89682122	92066155
chr12	92066155	94514567
chr12	94514567	96020785
chr12	96020785	97108839
chr12	97108839	99305987
chr12	99305987	101447641
chr12	101447641	101862690
chr12	101862690	102964986
chr12	102964986	104848696
chr12	104848696	106436213
chr12	106436213	106958748
chr12	106958748	109025901
chr12	109025901	110336719
chr12	110336719	113263518
chr12	113263518	113986709
chr12	113986709	115036602
chr12	115036602	115503216
chr12	115503216	117087471
chr12	117087471	118135375
chr12	118135375	119754110
chr12	119754110	122007651
chr12	122007651	124977980
chr12	124977980	126445505
chr12	126445505	127875098
chr12	127875098	129237297
chr12	129237297	130377921
chr12	130377921	131786751
chr12	131786751	132807034
chr12	132807034	133841511
chr13	19020013	20686720
chr13	20686720	22242174
chr13	22242174	23594702
chr13	23594702	24531937
chr13	24531937	25784362
chr13	25784362	27284362
chr13	27284362	29257551
chr13	29257551	30483267
chr13	30483267	32301815
chr13	32301815	33776903
chr13	33776903	35026464
chr13	35026464	36046367
chr13	36046367	37498185
chr13	37498185	38878163
chr13	38878163	41069263
chr13	41069263	43101027
chr13	43101027	44901409
chr13	44901409	46495214
chr13	46495214	47431079
chr13	47431079	49383962
chr13	49383962	51591091
chr13	51591091	53339622
chr13	53339622	54682864
chr13	54682864	55817131
chr13	55817131	57554217
chr13	57554217	58410626
chr13	58410626	59302271
chr13	59302271	60854778
chr13	60854778	61591949
chr13	61591949	63971559
chr13	63971559	65200602
chr13	65200602	67844453
chr13	67844453	70724516
chr13	70724516	71526791
chr13	71526791	73934089
chr13	73934089	75670143
chr13	75670143	77410555
chr13	77410555	78808813
chr13	78808813	80585676
chr13	80585676	82581814
chr13	82581814	84133144
chr13	84133144	85610916
chr13	85610916	88559882
chr13	88559882	90521311
chr13	90521311	93129691
chr13	93129691	93586455
chr13	93586455	96087558
chr13	96087558	97519210
chr13	97519210	98938919
chr13	98938919	100574095
chr13	100574095	102300523
chr13	102300523	104066710
chr13	104066710	104844114
chr13	104844114	106247554
chr13	106247554	106750000
chr13	106750000	108189877
chr13	108189877	109121210
chr13	109121210	109815112
chr13	109815112	111232073
chr13	111232073	112247592
chr13	112247592	113572488
chr13	113572488	115109853
chr14	19002084	21589402
chr14	21589402	23018665
chr14	23018665	24905123
chr14	24905123	26135686
chr14	26135686	28466533
chr14	28466533	29972145
chr14	29972145	32383265
chr14	32383265	34846251
chr14	34846251	35859593
chr14	35859593	38667725
chr14	38667725	40341990
chr14	40341990	41615502
chr14	41615502	43137389
chr14	43137389	44543227
chr14	44543227	46081896
chr14	46081896	46749130
chr14	46749130	48573586
chr14	48573586	49005471
chr14	49005471	50507760
chr14	50507760	51493572
chr14	51493572	53474383
chr14	53474383	53997831
chr14	53997831	55233681
chr14	55233681	56216880
chr14	56216880	57481262
chr14	57481262	59448336
chr14	59448336	61680424
chr14	61680424	63790015
chr14	63790015	65220298
chr14	65220298	66399555
chr14	66399555	67992317
chr14	67992317	71131957
chr14	71131957	72889615
chr14	72889615	76444767
chr14	76444767	77229472
chr14	77229472	78561945
chr14	78561945	80186579
chr14	80186579	81579714
chr14	81579714	83138097
chr14	83138097	84241633
chr14	84241633	85746319
chr14	85746319	86647002
chr14	86647002	87635341
chr14	87635341	89497643
chr14	89497643	91296860
chr14	91296860	93132299
chr14	93132299	94325285
chr14	94325285	95750867
chr14	95750867	96262415
chr14	96262415	98341162
chr14	98341162	99138532
chr14	99138532	101534307
chr14	101534307	103012102
chr14	103012102	105001723
chr14	105001723	106340358
chr14	106340358	107289454
chr15	20001200	21131604
chr15	21131604	24195127
chr15	24195127	25108590
chr15	25108590	27298112
chr15	27298112	29338502
chr15	29338502	30165568
chr15	30165568	31591821
chr15	31591821	32441811
chr15	32441811	34015425
chr15	34015425	35083251
chr15	35083251	37456502
chr15	37456502	38530777
chr15	38530777	40384132
chr15	40384132	41177514
chr15	41177514	42776399
chr15	42776399	44198049
chr15	44198049	46618787
chr15	46618787	48136048
chr15	48136048	50008043
chr15	50008043	51677560
chr15	51677560	53069096
chr15	53069096	54508528
chr15	54508528	55136269
chr15	55136269	56901773
chr15	56901773	58441366
chr15	58441366	59694116
chr15	59694116	61265836
chr15	61265836	63215222
chr15	63215222	65104668
chr15	65104668	67094767
chr15	67094767	69017999
chr15	69017999	70133341
chr15	70133341	71922649
chr15	71922649	73628714
chr15	73628714	76398624
chr15	76398624	78516053
chr15	78516053	80860978
chr15	80860978	84260468
chr15	84260468	86652905
chr15	86652905	88369943
chr15	88369943	90475551
chr15	90475551	92164392
chr15	92164392	93780902
chr15	93780902	94924330
chr15	94924330	96141596
chr15	96141596	98030910
chr15	98030910	99244059
chr15	99244059	100636847
chr15	100636847	101552694
chr15	101552694	102520966
chr16	60054	1207206
chr16	1207206	2764829
chr16	2764829	4001196
chr16	4001196	5118345
chr16	5118345	5891580
chr16	5891580	6893551
chr16	6893551	7529121
chr16	7529121	8338519
chr16	8338519	9799419
chr16	9799419	10426032
chr16	10426032	11520161
chr16	11520161	12613098
chr16	12613098	13154437
chr16	13154437	14464002
chr16	14464002	16154060
chr16	16154060	17644749
chr16	17644749	18643607
chr16	18643607	20150571
chr16	20150571	22448904
chr16	22448904	24136875
chr16	24136875	25986862
chr16	25986862	27445755
chr16	27445755	29036613
chr16	29036613	31382943
chr16	31382943	46399473
chr16	46399473	49007926
chr16	49007926	52035823
chr16	52035823	53382572
chr16	53382572	55903774
chr16	55903774	57664330
chr16	57664330	59045405
chr16	59045405	60745694
chr16	60745694	62229849
chr16	62229849	63691589
chr16	63691589	65938566
chr16	65938566	68841363
chr16	68841363	71054028
chr16	71054028	72935150
chr16	72935150	74971503
chr16	74971503	75977954
chr16	75977954	77523678
chr16	77523678	78456292
chr16	78456292	79134815
chr16	79134815	80297374
chr16	80297374	81772536
chr16	81772536	82747728
chr16	82747728	83477208
chr16	83477208	84445883
chr16	84445883	85148685
chr16	85148685	86156599
chr16	86156599	86815411
chr16	86815411	87647349
chr16	87647349	89041165
chr16	89041165	90292812
chr17	56	1172399
chr17	1172399	1928731
chr17	1928731	3702312
chr17	3702312	4696261
chr17	4696261	5741334
chr17	5741334	7317398
chr17	7317398	8306425
chr17	8306425	9965921
chr17	9965921	11102815
chr17	11102815	12534769
chr17	12534769	13180372
chr17	13180372	13894637
chr17	13894637	15019097
chr17	15019097	16412342
chr17	16412342	18856320
chr17	18856320	21290357
chr17	21290357	27334244
chr17	27334244	29786491
chr17	29786491	31538425
chr17	31538425	32912798
chr17	32912798	34469036
chr17	34469036	36809344
chr17	36809344	38877404
chr17	38877404	39899810
chr17	39899810	41772087
chr17	41772087	43056905
chr17	43056905	45876022
chr17	45876022	47517400
chr17	47517400	49898957
chr17	49898957	50719055
chr17	50719055	51826118
chr17	51826118	53599432
chr17	53599432	55357541
chr17	55357541	57487512
chr17	57487512	59312755
chr17	59312755	61545589
chr17	61545589	63148128
chr17	63148128	64800430
chr17	64800430	67858770
chr17	67858770	69387817
chr17	69387817	72672203
chr17	72672203	74375560
chr17	74375560	76263413
chr17	76263413	77298636
chr17	77298636	78837588
chr17	78837588	80034408
chr17	80034408	81194908
chr18	10644	912486
chr18	912486	1942911
chr18	1942911	3891658
chr18	3891658	5834180
chr18	5834180	7090485
chr18	7090485	8498931
chr18	8498931	11075913
chr18	11075913	11905440
chr18	11905440	14440799
chr18	14440799	19485844
chr18	19485844	20649472
chr18	20649472	22996651
chr18	22996651	24026191
chr18	24026191	25927682
chr18	25927682	26875587
chr18	26875587	27866478
chr18	27866478	30264066
chr18	30264066	31780067
chr18	31780067	33861964
chr18	33861964	35075250
chr18	35075250	36365490
chr18	36365490	37684367
chr18	37684367	39892648
chr18	39892648	42922106
chr18	42922106	44299246
chr18	44299246	45939732
chr18	45939732	47730584
chr18	47730584	51062185
chr18	51062185	51554175
chr18	51554175	55213838
chr18	55213838	56530220
chr18	56530220	57630483
chr18	57630483	59020751
chr18	59020751	60277715
chr18	60277715	61820252
chr18	61820252	63463402
chr18	63463402	64252801
chr18	64252801	66125817
chr18	66125817	67175820
chr18	67175820	68621179
chr18	68621179	69621618
chr18	69621618	71038474
chr18	71038474	71971462
chr18	71971462	73526987
chr18	73526987	74813815
chr18	74813815	75976317
chr18	75976317	77149991
chr18	77149991	78017158
chr19	80840	610729
chr19	610729	2098396
chr19	2098396	3019660
chr19	3019660	4348967
chr19	4348967	5811852
chr19	5811852	6684885
chr19	6684885	8347513
chr19	8347513	9238393
chr19	9238393	11284028
chr19	11284028	13471127
chr19	13471127	14486347
chr19	14486347	15648610
chr19	15648610	16374416
chr19	16374416	18409862
chr19	18409862	19877471
chr19	19877471	20905757
chr19	20905757	22732896
chr19	22732896	23467746
chr19	23467746	28557893
chr19	28557893	29790947
chr19	29790947	30727954
chr19	30727954	32746520
chr19	32746520	34262952
chr19	34262952	36469295
chr19	36469295	37527033
chr19	37527033	40170619
chr19	40170619	40984601
chr19	40984601	42131573
chr19	42131573	43862455
chr19	43862455	44744108
chr19	44744108	46102697
chr19	46102697	47150082
chr19	47150082	49282227
chr19	49282227	51532567
chr19	51532567	52985290
chr19	52985290	54602362
chr19	54602362	55728080
chr19	55728080	57521335
chr19	57521335	59118839
chr20	60479	697600
chr20	697600	2469501
chr20	2469501	3828413
chr20	3828413	5477850
chr20	5477850	7084073
chr20	7084073	8117011
chr20	8117011	9730921
chr20	9730921	11249536
chr20	11249536	12447499
chr20	12447499	13689864
chr20	13689864	15958359
chr20	15958359	17487232
chr20	17487232	18972203
chr20	18972203	20959710
chr20	20959710	22491456
chr20	22491456	23293790
chr20	23293790	24717724
chr20	24717724	25344231
chr20	25344231	31614823
chr20	31614823	32813441
chr20	32813441	34960446
chr20	34960446	36909530
chr20	36909530	38436761
chr20	38436761	39610856
chr20	39610856	40585689
chr20	40585689	41615460
chr20	41615460	42680176
chr20	42680176	44839056
chr20	44839056	47199980
chr20	47199980	49239658
chr20	49239658	52472549
chr20	52472549	54055266
chr20	54055266	56447959
chr20	56447959	58406572
chr20	58406572	59561724
chr20	59561724	61301855
chr20	61301855	62190180
chr20	62190180	62965163
chr21	9411243	15950982
chr21	15950982	18053165
chr21	18053165	19480375
chr21	19480375	20962339
chr21	20962339	22072764
chr21	22072764	23362875
chr21	23362875	24696231
chr21	24696231	26469122
chr21	26469122	27271019
chr21	27271019	29125226
chr21	29125226	31197025
chr21	31197025	32668642
chr21	32668642	34376999
chr21	34376999	35225465
chr21	35225465	36524373
chr21	36524373	37870779
chr21	37870779	38711704
chr21	38711704	40482902
chr21	40482902	41389527
chr21	41389527	43321528
chr21	43321528	44506268
chr21	44506268	46177105
chr21	46177105	47492226
chr21	47492226	48119752
chr22	16050408	17674295
chr22	17674295	18296088
chr22	18296088	19912358
chr22	19912358	22357325
chr22	22357325	23712647
chr22	23712647	24984204
chr22	24984204	26791628
chr22	26791628	27834752
chr22	27834752	29651799
chr22	29651799	31439918
chr22	31439918	32664986
chr22	32664986	34494914
chr22	34494914	35530985
chr22	35530985	37570269
chr22	37570269	39307894
chr22	39307894	40545797
chr22	40545797	42690818
chr22	42690818	43714200
chr22	43714200	44995308
chr22	44995308	46470495
chr22	46470495	47596318
chr22	47596318	48903703
chr22	48903703	49824534
chr22	49824534	51243298

## Sheet: ST2b
Supplementary Table 2b: AFR population LD blocks using pre-computed cutoff points determined using Ldetect software
Chrom	LD_Start	LD_End
chr1	10583	1577084
chr1	1577084	2364990
chr1	2364990	3150345
chr1	3150345	4284187
chr1	4284187	4854314
chr1	4854314	5914887
chr1	5914887	7170719
chr1	7170719	8202408
chr1	8202408	9366009
chr1	9366009	10643433
chr1	10643433	11240013
chr1	11240013	12106844
chr1	12106844	13950570
chr1	13950570	15151738
chr1	15151738	16084492
chr1	16084492	17175686
chr1	17175686	18568222
chr1	18568222	19241068
chr1	19241068	20436391
chr1	20436391	21977332
chr1	21977332	22736729
chr1	22736729	23446272
chr1	23446272	24527561
chr1	24527561	25309023
chr1	25309023	26481589
chr1	26481589	27402919
chr1	27402919	30160741
chr1	30160741	30279164
chr1	30279164	31165840
chr1	31165840	32154000
chr1	32154000	34372892
chr1	34372892	35316817
chr1	35316817	35746301
chr1	35746301	37326704
chr1	37326704	38874420
chr1	38874420	40093903
chr1	40093903	40936568
chr1	40936568	41975149
chr1	41975149	43460977
chr1	43460977	45083050
chr1	45083050	46899423
chr1	46899423	48004776
chr1	48004776	49069072
chr1	49069072	50593006
chr1	50593006	51541862
chr1	51541862	53115475
chr1	53115475	53836499
chr1	53836499	54666161
chr1	54666161	55225846
chr1	55225846	55752374
chr1	55752374	57180720
chr1	57180720	58385187
chr1	58385187	59488081
chr1	59488081	60459939
chr1	60459939	61358326
chr1	61358326	62804139
chr1	62804139	63630127
chr1	63630127	64259230
chr1	64259230	65605891
chr1	65605891	66773821
chr1	66773821	67595777
chr1	67595777	68665338
chr1	68665338	69791422
chr1	69791422	70946629
chr1	70946629	72509742
chr1	72509742	73347020
chr1	73347020	75014926
chr1	75014926	75994016
chr1	75994016	76729016
chr1	76729016	77695541
chr1	77695541	79261567
chr1	79261567	80100706
chr1	80100706	81063143
chr1	81063143	81849125
chr1	81849125	82564252
chr1	82564252	83832323
chr1	83832323	84844495
chr1	84844495	85940450
chr1	85940450	86949137
chr1	86949137	88456046
chr1	88456046	90066303
chr1	90066303	91871087
chr1	91871087	92938441
chr1	92938441	94454373
chr1	94454373	95314037
chr1	95314037	96596864
chr1	96596864	97462095
chr1	97462095	98802183
chr1	98802183	99556488
chr1	99556488	100765184
chr1	100765184	101682955
chr1	101682955	102423411
chr1	102423411	103573812
chr1	103573812	104371832
chr1	104371832	104984550
chr1	104984550	105413132
chr1	105413132	106088624
chr1	106088624	107875774
chr1	107875774	109268361
chr1	109268361	110334940
chr1	110334940	111236688
chr1	111236688	112347492
chr1	112347492	113752748
chr1	113752748	114652486
chr1	114652486	115880593
chr1	115880593	117351267
chr1	117351267	118838626
chr1	118838626	119836143
chr1	119836143	145783664
chr1	145783664	148953844
chr1	148953844	151139759
chr1	151139759	152537854
chr1	152537854	153329919
chr1	153329919	154769707
chr1	154769707	156336044
chr1	156336044	157155562
chr1	157155562	158727375
chr1	158727375	158904744
chr1	158904744	160921947
chr1	160921947	161675110
chr1	161675110	163344595
chr1	163344595	163948372
chr1	163948372	165192878
chr1	165192878	166364624
chr1	166364624	167100361
chr1	167100361	168567349
chr1	168567349	168696237
chr1	168696237	169647437
chr1	169647437	171043932
chr1	171043932	171648757
chr1	171648757	173302306
chr1	173302306	175089874
chr1	175089874	177016829
chr1	177016829	177937079
chr1	177937079	178943432
chr1	178943432	180121831
chr1	180121831	181144897
chr1	181144897	182424276
chr1	182424276	183553044
chr1	183553044	183932226
chr1	183932226	184953983
chr1	184953983	184970522
chr1	184970522	187053791
chr1	187053791	188760389
chr1	188760389	189904482
chr1	189904482	191869188
chr1	191869188	192791206
chr1	192791206	193507520
chr1	193507520	194281756
chr1	194281756	195155979
chr1	195155979	196178348
chr1	196178348	196736014
chr1	196736014	198096572
chr1	198096572	199239076
chr1	199239076	200020803
chr1	200020803	201629739
chr1	201629739	202822261
chr1	202822261	203980752
chr1	203980752	204930668
chr1	204930668	205487021
chr1	205487021	207042277
chr1	207042277	207878641
chr1	207878641	208995848
chr1	208995848	209725571
chr1	209725571	210626867
chr1	210626867	211374455
chr1	211374455	212346008
chr1	212346008	214411452
chr1	214411452	215134041
chr1	215134041	216729434
chr1	216729434	218295398
chr1	218295398	219254577
chr1	219254577	220532529
chr1	220532529	221151629
chr1	221151629	221859777
chr1	221859777	223632068
chr1	223632068	224939012
chr1	224939012	225554182
chr1	225554182	226811744
chr1	226811744	227683468
chr1	227683468	229369485
chr1	229369485	230777436
chr1	230777436	231395521
chr1	231395521	232811263
chr1	232811263	233760366
chr1	233760366	234763954
chr1	234763954	236162592
chr1	236162592	236909190
chr1	236909190	237827756
chr1	237827756	238725762
chr1	238725762	239566530
chr1	239566530	240563848
chr1	240563848	241582349
chr1	241582349	242072418
chr1	242072418	243046648
chr1	243046648	244259705
chr1	244259705	245124253
chr1	245124253	245966767
chr1	245966767	246607202
chr1	246607202	248140056
chr1	248140056	249239466
chr2	10133	341834
chr2	341834	1161563
chr2	1161563	1688845
chr2	1688845	2829810
chr2	2829810	3389305
chr2	3389305	4319941
chr2	4319941	5708198
chr2	5708198	6308801
chr2	6308801	7045637
chr2	7045637	8642585
chr2	8642585	9907624
chr2	9907624	10971017
chr2	10971017	11758221
chr2	11758221	13068332
chr2	13068332	14304990
chr2	14304990	14390736
chr2	14390736	15055681
chr2	15055681	16550462
chr2	16550462	17462470
chr2	17462470	19188347
chr2	19188347	20401612
chr2	20401612	20842642
chr2	20842642	21926106
chr2	21926106	22429229
chr2	22429229	23536651
chr2	23536651	24688055
chr2	24688055	26776127
chr2	26776127	28487388
chr2	28487388	29455479
chr2	29455479	30415815
chr2	30415815	30727866
chr2	30727866	31567374
chr2	31567374	32498259
chr2	32498259	33733196
chr2	33733196	34497190
chr2	34497190	34815865
chr2	34815865	35611326
chr2	35611326	36466770
chr2	36466770	37604278
chr2	37604278	38133181
chr2	38133181	38885104
chr2	38885104	40080880
chr2	40080880	40506796
chr2	40506796	41384161
chr2	41384161	42089280
chr2	42089280	43312204
chr2	43312204	44276075
chr2	44276075	45408269
chr2	45408269	46127849
chr2	46127849	46723211
chr2	46723211	47807107
chr2	47807107	48953185
chr2	48953185	49569434
chr2	49569434	50819696
chr2	50819696	52332720
chr2	52332720	52786543
chr2	52786543	53861637
chr2	53861637	54685940
chr2	54685940	56203479
chr2	56203479	57429382
chr2	57429382	58846099
chr2	58846099	60728186
chr2	60728186	62428109
chr2	62428109	64825612
chr2	64825612	65298646
chr2	65298646	66327841
chr2	66327841	67225473
chr2	67225473	68032753
chr2	68032753	69345471
chr2	69345471	70579825
chr2	70579825	71939617
chr2	71939617	73176103
chr2	73176103	74363592
chr2	74363592	74972018
chr2	74972018	76181590
chr2	76181590	76891598
chr2	76891598	78078781
chr2	78078781	78843121
chr2	78843121	80048655
chr2	80048655	80804550
chr2	80804550	81620571
chr2	81620571	82691807
chr2	82691807	84371694
chr2	84371694	85386144
chr2	85386144	86743249
chr2	86743249	91777440
chr2	91777440	97348109
chr2	97348109	98145422
chr2	98145422	99262553
chr2	99262553	100545855
chr2	100545855	101340062
chr2	101340062	102237117
chr2	102237117	103308802
chr2	103308802	105189868
chr2	105189868	105874695
chr2	105874695	107408267
chr2	107408267	108156847
chr2	108156847	109541135
chr2	109541135	111033830
chr2	111033830	112038209
chr2	112038209	113476883
chr2	113476883	114065124
chr2	114065124	115607824
chr2	115607824	116058192
chr2	116058192	116776780
chr2	116776780	117821875
chr2	117821875	118952957
chr2	118952957	120259594
chr2	120259594	121358474
chr2	121358474	123223449
chr2	123223449	124732511
chr2	124732511	125763337
chr2	125763337	127772592
chr2	127772592	129312598
chr2	129312598	129865338
chr2	129865338	130617197
chr2	130617197	131474182
chr2	131474182	133640625
chr2	133640625	135158650
chr2	135158650	135985564
chr2	135985564	137629840
chr2	137629840	138395810
chr2	138395810	138880563
chr2	138880563	139811930
chr2	139811930	140232398
chr2	140232398	141336131
chr2	141336131	142793102
chr2	142793102	143926523
chr2	143926523	145305194
chr2	145305194	147254110
chr2	147254110	148177539
chr2	148177539	149269489
chr2	149269489	150210395
chr2	150210395	151191044
chr2	151191044	151998046
chr2	151998046	152494570
chr2	152494570	153466206
chr2	153466206	154414566
chr2	154414566	155391418
chr2	155391418	156765630
chr2	156765630	158631735
chr2	158631735	159576806
chr2	159576806	160380717
chr2	160380717	162102538
chr2	162102538	163415640
chr2	163415640	164225269
chr2	164225269	165205052
chr2	165205052	166534988
chr2	166534988	167490628
chr2	167490628	168811824
chr2	168811824	169752951
chr2	169752951	170272727
chr2	170272727	171079150
chr2	171079150	172088587
chr2	172088587	173137149
chr2	173137149	173658863
chr2	173658863	174553140
chr2	174553140	175589800
chr2	175589800	177364438
chr2	177364438	178553113
chr2	178553113	180337235
chr2	180337235	181314165
chr2	181314165	182266096
chr2	182266096	182847531
chr2	182847531	184356242
chr2	184356242	184915173
chr2	184915173	186246384
chr2	186246384	186913397
chr2	186913397	188896664
chr2	188896664	189750863
chr2	189750863	190942898
chr2	190942898	191874104
chr2	191874104	192594172
chr2	192594172	195123157
chr2	195123157	196052944
chr2	196052944	197309019
chr2	197309019	197829131
chr2	197829131	199253528
chr2	199253528	199928465
chr2	199928465	200922172
chr2	200922172	202862336
chr2	202862336	204445957
chr2	204445957	205799248
chr2	205799248	206507745
chr2	206507745	208118775
chr2	208118775	209750775
chr2	209750775	210842814
chr2	210842814	212194770
chr2	212194770	212846385
chr2	212846385	214014534
chr2	214014534	215245777
chr2	215245777	216450540
chr2	216450540	217553018
chr2	217553018	218828874
chr2	218828874	219849633
chr2	219849633	220917056
chr2	220917056	221809670
chr2	221809670	222986696
chr2	222986696	224176380
chr2	224176380	224932899
chr2	224932899	225366401
chr2	225366401	226670833
chr2	226670833	227533266
chr2	227533266	228117831
chr2	228117831	228811408
chr2	228811408	230069601
chr2	230069601	231327220
chr2	231327220	232584840
chr2	232584840	233365142
chr2	233365142	233965933
chr2	233965933	235010463
chr2	235010463	235973157
chr2	235973157	236768465
chr2	236768465	237694123
chr2	237694123	238647484
chr2	238647484	239523868
chr2	239523868	240622717
chr2	240622717	241384855
chr2	241384855	242149733
chr2	242149733	243188920
chr3	60157	676398
chr3	676398	1091868
chr3	1091868	2039765
chr3	2039765	2726154
chr3	2726154	3587553
chr3	3587553	4877768
chr3	4877768	5802414
chr3	5802414	6844970
chr3	6844970	7603040
chr3	7603040	8673722
chr3	8673722	9344354
chr3	9344354	9971967
chr3	9971967	11101758
chr3	11101758	11714341
chr3	11714341	12427801
chr3	12427801	13732840
chr3	13732840	14817904
chr3	14817904	16284030
chr3	16284030	17394965
chr3	17394965	19125482
chr3	19125482	20374566
chr3	20374566	21524925
chr3	21524925	22416959
chr3	22416959	23123857
chr3	23123857	23649747
chr3	23649747	24410936
chr3	24410936	25460125
chr3	25460125	26877202
chr3	26877202	27958681
chr3	27958681	29017561
chr3	29017561	29813802
chr3	29813802	30662554
chr3	30662554	31066298
chr3	31066298	32124034
chr3	32124034	32466302
chr3	32466302	33254042
chr3	33254042	34199650
chr3	34199650	34814101
chr3	34814101	35536014
chr3	35536014	36832480
chr3	36832480	37533758
chr3	37533758	38356513
chr3	38356513	39422117
chr3	39422117	40084825
chr3	40084825	40899164
chr3	40899164	42335423
chr3	42335423	43802618
chr3	43802618	45396119
chr3	45396119	46657623
chr3	46657623	47629025
chr3	47629025	49416032
chr3	49416032	52064357
chr3	52064357	53886457
chr3	53886457	55267911
chr3	55267911	56434016
chr3	56434016	58552329
chr3	58552329	59904017
chr3	59904017	60808666
chr3	60808666	62358427
chr3	62358427	63145510
chr3	63145510	64479281
chr3	64479281	65584843
chr3	65584843	65832619
chr3	65832619	66905196
chr3	66905196	67833495
chr3	67833495	69430169
chr3	69430169	70891777
chr3	70891777	72528973
chr3	72528973	73241472
chr3	73241472	74096494
chr3	74096494	74546763
chr3	74546763	75377908
chr3	75377908	76159763
chr3	76159763	77153176
chr3	77153176	77809733
chr3	77809733	79024917
chr3	79024917	79572545
chr3	79572545	81426888
chr3	81426888	82504148
chr3	82504148	83327409
chr3	83327409	85394742
chr3	85394742	85571534
chr3	85571534	87088666
chr3	87088666	87589989
chr3	87589989	88369178
chr3	88369178	93505309
chr3	93505309	94255686
chr3	94255686	96057808
chr3	96057808	97360706
chr3	97360706	98302449
chr3	98302449	99045953
chr3	99045953	99695731
chr3	99695731	100593840
chr3	100593840	101902780
chr3	101902780	103027345
chr3	103027345	103449506
chr3	103449506	104580796
chr3	104580796	105338945
chr3	105338945	106336064
chr3	106336064	107236452
chr3	107236452	108636709
chr3	108636709	110095062
chr3	110095062	110930468
chr3	110930468	111942168
chr3	111942168	112595812
chr3	112595812	113948986
chr3	113948986	115409625
chr3	115409625	116314608
chr3	116314608	117445030
chr3	117445030	118903462
chr3	118903462	120149208
chr3	120149208	121130894
chr3	121130894	122345089
chr3	122345089	123427584
chr3	123427584	124280898
chr3	124280898	124936373
chr3	124936373	126213981
chr3	126213981	127069063
chr3	127069063	127471729
chr3	127471729	128185017
chr3	128185017	128643317
chr3	128643317	130025371
chr3	130025371	131373770
chr3	131373770	132449426
chr3	132449426	133574978
chr3	133574978	134694248
chr3	134694248	136073920
chr3	136073920	137771782
chr3	137771782	139032496
chr3	139032496	139955032
chr3	139955032	140768753
chr3	140768753	141919071
chr3	141919071	142691199
chr3	142691199	143534134
chr3	143534134	144884907
chr3	144884907	145517757
chr3	145517757	146967937
chr3	146967937	149152133
chr3	149152133	150530656
chr3	150530656	151312058
chr3	151312058	152289535
chr3	152289535	153405259
chr3	153405259	154184568
chr3	154184568	156150321
chr3	156150321	157167509
chr3	157167509	158065283
chr3	158065283	159274740
chr3	159274740	160403714
chr3	160403714	161524489
chr3	161524489	162343229
chr3	162343229	163255068
chr3	163255068	163974758
chr3	163974758	165055929
chr3	165055929	165936203
chr3	165936203	167294394
chr3	167294394	169192616
chr3	169192616	170378451
chr3	170378451	171039629
chr3	171039629	171886137
chr3	171886137	172581839
chr3	172581839	173865977
chr3	173865977	175051754
chr3	175051754	176031973
chr3	176031973	177441767
chr3	177441767	177744882
chr3	177744882	179573585
chr3	179573585	180523244
chr3	180523244	181935074
chr3	181935074	182969439
chr3	182969439	184324202
chr3	184324202	185565964
chr3	185565964	186694340
chr3	186694340	187461868
chr3	187461868	188397350
chr3	188397350	189452798
chr3	189452798	190262867
chr3	190262867	191224425
chr3	191224425	192296073
chr3	192296073	193100990
chr3	193100990	193887734
chr3	193887734	194540459
chr3	194540459	195644820
chr3	195644820	196388023
chr3	196388023	197082193
chr3	197082193	197946622
chr4	10240	687511
chr4	687511	1684643
chr4	1684643	2305227
chr4	2305227	2834742
chr4	2834742	3845785
chr4	3845785	4245591
chr4	4245591	4766591
chr4	4766591	5401017
chr4	5401017	5643190
chr4	5643190	6521323
chr4	6521323	7148478
chr4	7148478	7539243
chr4	7539243	8156982
chr4	8156982	9217084
chr4	9217084	9408706
chr4	9408706	11051086
chr4	11051086	12322193
chr4	12322193	13004594
chr4	13004594	14033518
chr4	14033518	14806062
chr4	14806062	16015596
chr4	16015596	16579302
chr4	16579302	17466663
chr4	17466663	17797758
chr4	17797758	19071748
chr4	19071748	20088277
chr4	20088277	21335953
chr4	21335953	22319994
chr4	22319994	22832682
chr4	22832682	23924075
chr4	23924075	25470692
chr4	25470692	26836221
chr4	26836221	27705166
chr4	27705166	28222858
chr4	28222858	29313923
chr4	29313923	30154627
chr4	30154627	31205517
chr4	31205517	32260538
chr4	32260538	33200599
chr4	33200599	34357426
chr4	34357426	36303852
chr4	36303852	37255698
chr4	37255698	38286557
chr4	38286557	39427020
chr4	39427020	40393464
chr4	40393464	41222719
chr4	41222719	42663370
chr4	42663370	43145456
chr4	43145456	44139213
chr4	44139213	45189924
chr4	45189924	46054691
chr4	46054691	47412266
chr4	47412266	47710585
chr4	47710585	48823980
chr4	48823980	53817863
chr4	53817863	54657396
chr4	54657396	55752128
chr4	55752128	56546693
chr4	56546693	57430922
chr4	57430922	58078979
chr4	58078979	58935043
chr4	58935043	60085391
chr4	60085391	60866605
chr4	60866605	61821922
chr4	61821922	62370661
chr4	62370661	63240972
chr4	63240972	63843287
chr4	63843287	64340654
chr4	64340654	64747722
chr4	64747722	66128225
chr4	66128225	66620680
chr4	66620680	67037825
chr4	67037825	68059162
chr4	68059162	68458381
chr4	68458381	69601661
chr4	69601661	71049152
chr4	71049152	72016502
chr4	72016502	72802206
chr4	72802206	73855509
chr4	73855509	74726880
chr4	74726880	75631228
chr4	75631228	76827157
chr4	76827157	77719622
chr4	77719622	78334882
chr4	78334882	79094834
chr4	79094834	80084154
chr4	80084154	81208102
chr4	81208102	82126121
chr4	82126121	83372471
chr4	83372471	84286738
chr4	84286738	85289325
chr4	85289325	86603545
chr4	86603545	87753539
chr4	87753539	89237737
chr4	89237737	90234948
chr4	90234948	91560613
chr4	91560613	93450935
chr4	93450935	94233344
chr4	94233344	95097989
chr4	95097989	96314365
chr4	96314365	96905230
chr4	96905230	97783246
chr4	97783246	99709224
chr4	99709224	100729588
chr4	100729588	101897037
chr4	101897037	102706911
chr4	102706911	104376204
chr4	104376204	104804496
chr4	104804496	105705507
chr4	105705507	106508007
chr4	106508007	107821660
chr4	107821660	108821231
chr4	108821231	111325664
chr4	111325664	113247366
chr4	113247366	115665840
chr4	115665840	117043351
chr4	117043351	118388140
chr4	118388140	119110853
chr4	119110853	121393877
chr4	121393877	122150120
chr4	122150120	123564877
chr4	123564877	124387864
chr4	124387864	125864038
chr4	125864038	126751642
chr4	126751642	127823456
chr4	127823456	129488725
chr4	129488725	130591942
chr4	130591942	131284154
chr4	131284154	132159527
chr4	132159527	133742120
chr4	133742120	134628275
chr4	134628275	135917915
chr4	135917915	136129288
chr4	136129288	137248644
chr4	137248644	137832558
chr4	137832558	138234868
chr4	138234868	139117653
chr4	139117653	139607794
chr4	139607794	141562493
chr4	141562493	142337646
chr4	142337646	144407242
chr4	144407242	145518312
chr4	145518312	147010779
chr4	147010779	149137625
chr4	149137625	150926532
chr4	150926532	152782334
chr4	152782334	154477810
chr4	154477810	155057510
chr4	155057510	155772857
chr4	155772857	156519992
chr4	156519992	157446692
chr4	157446692	157892376
chr4	157892376	158125630
chr4	158125630	158750049
chr4	158750049	160360026
chr4	160360026	161116375
chr4	161116375	162410833
chr4	162410833	163413815
chr4	163413815	164779494
chr4	164779494	165222987
chr4	165222987	165823644
chr4	165823644	167018251
chr4	167018251	167852085
chr4	167852085	169413768
chr4	169413768	170776510
chr4	170776510	172559172
chr4	172559172	174052266
chr4	174052266	175429593
chr4	175429593	176375967
chr4	176375967	177295182
chr4	177295182	178152876
chr4	178152876	179933205
chr4	179933205	180588135
chr4	180588135	182160359
chr4	182160359	182789614
chr4	182789614	183934211
chr4	183934211	184442557
chr4	184442557	185329704
chr4	185329704	185982902
chr4	185982902	186714617
chr4	186714617	187391680
chr4	187391680	188228281
chr4	188228281	189155493
chr4	189155493	189547260
chr4	189547260	190431993
chr4	190431993	191043594
chr5	11940	402961
chr5	402961	1234791
chr5	1234791	1935573
chr5	1935573	2723761
chr5	2723761	3104935
chr5	3104935	3779073
chr5	3779073	4399327
chr5	4399327	5406015
chr5	5406015	6338458
chr5	6338458	7184196
chr5	7184196	8445960
chr5	8445960	9536260
chr5	9536260	11303053
chr5	11303053	12781330
chr5	12781330	14733552
chr5	14733552	15549450
chr5	15549450	16592900
chr5	16592900	17093864
chr5	17093864	18129404
chr5	18129404	18743295
chr5	18743295	19916949
chr5	19916949	20561173
chr5	20561173	22152341
chr5	22152341	22657027
chr5	22657027	23439150
chr5	23439150	24365963
chr5	24365963	25719552
chr5	25719552	26360908
chr5	26360908	26937837
chr5	26937837	27368297
chr5	27368297	28720094
chr5	28720094	29714813
chr5	29714813	30566069
chr5	30566069	31762552
chr5	31762552	32724806
chr5	32724806	33594400
chr5	33594400	35049266
chr5	35049266	36664785
chr5	36664785	38142953
chr5	38142953	39438251
chr5	39438251	40219120
chr5	40219120	41432325
chr5	41432325	42858279
chr5	42858279	43473531
chr5	43473531	44827069
chr5	44827069	50163398
chr5	50163398	52133670
chr5	52133670	52672886
chr5	52672886	54328823
chr5	54328823	55417102
chr5	55417102	56335027
chr5	56335027	57339989
chr5	57339989	57900519
chr5	57900519	59570629
chr5	59570629	59841616
chr5	59841616	61620881
chr5	61620881	62534511
chr5	62534511	63218546
chr5	63218546	63484869
chr5	63484869	65083571
chr5	65083571	66509702
chr5	66509702	67408356
chr5	67408356	68868972
chr5	68868972	71133485
chr5	71133485	72465174
chr5	72465174	74241527
chr5	74241527	75244751
chr5	75244751	76311435
chr5	76311435	77176458
chr5	77176458	78125685
chr5	78125685	79392941
chr5	79392941	80449002
chr5	80449002	82082054
chr5	82082054	83307081
chr5	83307081	84398553
chr5	84398553	86131569
chr5	86131569	87217958
chr5	87217958	89586850
chr5	89586850	89916950
chr5	89916950	91078359
chr5	91078359	92632878
chr5	92632878	94461732
chr5	94461732	95111205
chr5	95111205	95963472
chr5	95963472	96872554
chr5	96872554	97741547
chr5	97741547	98565687
chr5	98565687	100594915
chr5	100594915	101111056
chr5	101111056	101612034
chr5	101612034	103084572
chr5	103084572	104224265
chr5	104224265	105066439
chr5	105066439	105893029
chr5	105893029	107111474
chr5	107111474	107817713
chr5	107817713	109496785
chr5	109496785	109931258
chr5	109931258	111135806
chr5	111135806	111982391
chr5	111982391	113123590
chr5	113123590	113778524
chr5	113778524	114452054
chr5	114452054	115120707
chr5	115120707	115845075
chr5	115845075	117005251
chr5	117005251	117715060
chr5	117715060	118151862
chr5	118151862	119389032
chr5	119389032	119868284
chr5	119868284	120964922
chr5	120964922	121487402
chr5	121487402	122525885
chr5	122525885	123596349
chr5	123596349	123798024
chr5	123798024	124854562
chr5	124854562	125866978
chr5	125866978	127344716
chr5	127344716	129106379
chr5	129106379	129518831
chr5	129518831	130759192
chr5	130759192	132812133
chr5	132812133	133417639
chr5	133417639	134330500
chr5	134330500	135342829
chr5	135342829	136942264
chr5	136942264	137952062
chr5	137952062	138410580
chr5	138410580	140645771
chr5	140645771	141998380
chr5	141998380	143041631
chr5	143041631	144695543
chr5	144695543	145082620
chr5	145082620	146434325
chr5	146434325	147181194
chr5	147181194	147860935
chr5	147860935	148810403
chr5	148810403	149659321
chr5	149659321	150169521
chr5	150169521	151656398
chr5	151656398	152504399
chr5	152504399	153898905
chr5	153898905	154761970
chr5	154761970	155458563
chr5	155458563	156105624
chr5	156105624	157583742
chr5	157583742	158501191
chr5	158501191	159657041
chr5	159657041	160527015
chr5	160527015	161483495
chr5	161483495	162380321
chr5	162380321	162988795
chr5	162988795	163647383
chr5	163647383	164502961
chr5	164502961	165646314
chr5	165646314	166435006
chr5	166435006	167269157
chr5	167269157	168524897
chr5	168524897	169634790
chr5	169634790	170905061
chr5	170905061	172043924
chr5	172043924	173022860
chr5	173022860	174016838
chr5	174016838	174765555
chr5	174765555	175963245
chr5	175963245	177786775
chr5	177786775	178616811
chr5	178616811	179401127
chr5	179401127	180111682
chr5	180111682	180885156
chr6	73924	1452628
chr6	1452628	2890501
chr6	2890501	3297611
chr6	3297611	3956644
chr6	3956644	4747488
chr6	4747488	5546132
chr6	5546132	6622623
chr6	6622623	7975935
chr6	7975935	8907868
chr6	8907868	10178562
chr6	10178562	11237042
chr6	11237042	11911958
chr6	11911958	13316909
chr6	13316909	13835719
chr6	13835719	15066324
chr6	15066324	17489887
chr6	17489887	18712402
chr6	18712402	20802388
chr6	20802388	22154322
chr6	22154322	22453516
chr6	22453516	23334666
chr6	23334666	24139271
chr6	24139271	24852641
chr6	24852641	26141516
chr6	26141516	26510943
chr6	26510943	27432690
chr6	27432690	28132726
chr6	28132726	30074442
chr6	30074442	30932840
chr6	30932840	30990638
chr6	30990638	31997129
chr6	31997129	32682590
chr6	32682590	32965385
chr6	32965385	33958119
chr6	33958119	34726361
chr6	34726361	35786610
chr6	35786610	36761984
chr6	36761984	37572952
chr6	37572952	38472977
chr6	38472977	39295533
chr6	39295533	40607359
chr6	40607359	41169679
chr6	41169679	42289249
chr6	42289249	42823375
chr6	42823375	44462637
chr6	44462637	45527618
chr6	45527618	47131375
chr6	47131375	47888190
chr6	47888190	48445933
chr6	48445933	49957720
chr6	49957720	51171480
chr6	51171480	52050276
chr6	52050276	52994691
chr6	52994691	54293261
chr6	54293261	55191017
chr6	55191017	55468879
chr6	55468879	56105293
chr6	56105293	57084745
chr6	57084745	58137735
chr6	58137735	62693682
chr6	62693682	63174506
chr6	63174506	64108140
chr6	64108140	65274194
chr6	65274194	66049447
chr6	66049447	66563442
chr6	66563442	67261895
chr6	67261895	67557479
chr6	67557479	67973322
chr6	67973322	68849802
chr6	68849802	69523676
chr6	69523676	71012163
chr6	71012163	71970099
chr6	71970099	72451938
chr6	72451938	73562270
chr6	73562270	74405037
chr6	74405037	76129073
chr6	76129073	76658417
chr6	76658417	77261870
chr6	77261870	77937513
chr6	77937513	78957875
chr6	78957875	80328951
chr6	80328951	81774604
chr6	81774604	82389259
chr6	82389259	83575787
chr6	83575787	83996797
chr6	83996797	85035080
chr6	85035080	85265117
chr6	85265117	86042229
chr6	86042229	86860875
chr6	86860875	87650836
chr6	87650836	89086214
chr6	89086214	90122357
chr6	90122357	91640001
chr6	91640001	92749144
chr6	92749144	93729318
chr6	93729318	95063390
chr6	95063390	95830827
chr6	95830827	97093661
chr6	97093661	98212868
chr6	98212868	99673676
chr6	99673676	100630047
chr6	100630047	102097483
chr6	102097483	103233291
chr6	103233291	104212841
chr6	104212841	104947409
chr6	104947409	105532723
chr6	105532723	106116457
chr6	106116457	106923425
chr6	106923425	108052208
chr6	108052208	108478351
chr6	108478351	109651566
chr6	109651566	111391811
chr6	111391811	111509019
chr6	111509019	112967173
chr6	112967173	114220833
chr6	114220833	115376916
chr6	115376916	117081132
chr6	117081132	118527083
chr6	118527083	119883325
chr6	119883325	121081157
chr6	121081157	122194764
chr6	122194764	123478437
chr6	123478437	124138964
chr6	124138964	125077503
chr6	125077503	126443487
chr6	126443487	128599508
chr6	128599508	130272587
chr6	130272587	131457946
chr6	131457946	132644864
chr6	132644864	133201588
chr6	133201588	134492391
chr6	134492391	135588725
chr6	135588725	136963234
chr6	136963234	137680460
chr6	137680460	138246994
chr6	138246994	138994252
chr6	138994252	139741711
chr6	139741711	140437382
chr6	140437382	142037781
chr6	142037781	143287521
chr6	143287521	143833974
chr6	143833974	145516911
chr6	145516911	145906411
chr6	145906411	147848711
chr6	147848711	149277243
chr6	149277243	150253801
chr6	150253801	151538287
chr6	151538287	152537464
chr6	152537464	153551361
chr6	153551361	154462994
chr6	154462994	155375576
chr6	155375576	156349739
chr6	156349739	158011411
chr6	158011411	158968484
chr6	158968484	160579961
chr6	160579961	161367958
chr6	161367958	162567046
chr6	162567046	163616309
chr6	163616309	164594116
chr6	164594116	166140700
chr6	166140700	167024141
chr6	167024141	168042498
chr6	168042498	169236364
chr6	169236364	170330143
chr6	170330143	171051270
chr7	16161	282552
chr7	282552	1326128
chr7	1326128	2481697
chr7	2481697	3099742
chr7	3099742	3737877
chr7	3737877	4140794
chr7	4140794	4786401
chr7	4786401	5274412
chr7	5274412	6012381
chr7	6012381	7169107
chr7	7169107	7869868
chr7	7869868	9018657
chr7	9018657	9898287
chr7	9898287	10358389
chr7	10358389	10882509
chr7	10882509	11392914
chr7	11392914	12690840
chr7	12690840	13883691
chr7	13883691	14942900
chr7	14942900	15606558
chr7	15606558	16484919
chr7	16484919	17280025
chr7	17280025	18933869
chr7	18933869	20284577
chr7	20284577	20804394
chr7	20804394	21713204
chr7	21713204	22509634
chr7	22509634	23108345
chr7	23108345	24389486
chr7	24389486	24707272
chr7	24707272	25670021
chr7	25670021	25939161
chr7	25939161	27538706
chr7	27538706	28359562
chr7	28359562	29547904
chr7	29547904	30537638
chr7	30537638	32400372
chr7	32400372	33554498
chr7	33554498	34697922
chr7	34697922	35424351
chr7	35424351	36794559
chr7	36794559	37504470
chr7	37504470	38330981
chr7	38330981	38967908
chr7	38967908	40266794
chr7	40266794	40783073
chr7	40783073	42239509
chr7	42239509	42814590
chr7	42814590	44272624
chr7	44272624	45244624
chr7	45244624	46608744
chr7	46608744	47629909
chr7	47629909	48193681
chr7	48193681	49480763
chr7	49480763	50256417
chr7	50256417	50695741
chr7	50695741	52277294
chr7	52277294	53176376
chr7	53176376	54748199
chr7	54748199	57148429
chr7	57148429	63309592
chr7	63309592	63530469
chr7	63530469	64481838
chr7	64481838	65670371
chr7	65670371	67371498
chr7	67371498	68026886
chr7	68026886	68566919
chr7	68566919	70110723
chr7	70110723	71211570
chr7	71211570	71874314
chr7	71874314	73811279
chr7	73811279	75378297
chr7	75378297	76499177
chr7	76499177	78235174
chr7	78235174	79161760
chr7	79161760	80159694
chr7	80159694	82014288
chr7	82014288	83567854
chr7	83567854	84872124
chr7	84872124	85658213
chr7	85658213	87135480
chr7	87135480	88736547
chr7	88736547	89273166
chr7	89273166	90740687
chr7	90740687	92373231
chr7	92373231	93965496
chr7	93965496	95080338
chr7	95080338	96433270
chr7	96433270	97183525
chr7	97183525	98165708
chr7	98165708	98718982
chr7	98718982	99365451
chr7	99365451	100526597
chr7	100526597	101731558
chr7	101731558	103196514
chr7	103196514	104159641
chr7	104159641	105255304
chr7	105255304	106304879
chr7	106304879	107653364
chr7	107653364	109296109
chr7	109296109	110483222
chr7	110483222	111452821
chr7	111452821	112726115
chr7	112726115	113719026
chr7	113719026	115322759
chr7	115322759	116575153
chr7	116575153	116948171
chr7	116948171	117862621
chr7	117862621	119568003
chr7	119568003	120269244
chr7	120269244	120869338
chr7	120869338	122021184
chr7	122021184	123599483
chr7	123599483	124157107
chr7	124157107	124934561
chr7	124934561	125776083
chr7	125776083	126645862
chr7	126645862	127790172
chr7	127790172	128299901
chr7	128299901	129182507
chr7	129182507	129590581
chr7	129590581	130933461
chr7	130933461	131636009
chr7	131636009	132806475
chr7	132806475	134391169
chr7	134391169	135715469
chr7	135715469	136570618
chr7	136570618	137678170
chr7	137678170	138581576
chr7	138581576	139196425
chr7	139196425	140115143
chr7	140115143	140808056
chr7	140808056	141729905
chr7	141729905	142659566
chr7	142659566	144464712
chr7	144464712	145417174
chr7	145417174	146397715
chr7	146397715	148035676
chr7	148035676	149364473
chr7	149364473	150494372
chr7	150494372	151511834
chr7	151511834	152703523
chr7	152703523	153361654
chr7	153361654	154478116
chr7	154478116	155170191
chr7	155170191	155847343
chr7	155847343	156814565
chr7	156814565	157569965
chr7	157569965	158031442
chr7	158031442	158761759
chr7	158761759	159128575
chr8	10422	514106
chr8	514106	1037330
chr8	1037330	1290927
chr8	1290927	1822713
chr8	1822713	2408783
chr8	2408783	3024952
chr8	3024952	3392905
chr8	3392905	3586536
chr8	3586536	3925953
chr8	3925953	4435946
chr8	4435946	4891526
chr8	4891526	5568282
chr8	5568282	6062715
chr8	6062715	6463569
chr8	6463569	8087713
chr8	8087713	9042128
chr8	9042128	9634773
chr8	9634773	10535870
chr8	10535870	10941208
chr8	10941208	11468085
chr8	11468085	12616430
chr8	12616430	13264327
chr8	13264327	14026558
chr8	14026558	14452821
chr8	14452821	15003364
chr8	15003364	15274988
chr8	15274988	16347727
chr8	16347727	17057024
chr8	17057024	17946509
chr8	17946509	18936782
chr8	18936782	19492271
chr8	19492271	20048313
chr8	20048313	20807849
chr8	20807849	21661737
chr8	21661737	22774330
chr8	22774330	23789678
chr8	23789678	24672842
chr8	24672842	26082080
chr8	26082080	26900328
chr8	26900328	28324676
chr8	28324676	29254091
chr8	29254091	30532977
chr8	30532977	30817136
chr8	30817136	32119175
chr8	32119175	33276987
chr8	33276987	35534183
chr8	35534183	36641572
chr8	36641572	38601949
chr8	38601949	38999312
chr8	38999312	39828231
chr8	39828231	40704390
chr8	40704390	41706456
chr8	41706456	46841315
chr8	46841315	49883697
chr8	49883697	51463011
chr8	51463011	52157384
chr8	52157384	53302330
chr8	53302330	54117233
chr8	54117233	55405575
chr8	55405575	56535812
chr8	56535812	57734691
chr8	57734691	58912113
chr8	58912113	59981430
chr8	59981430	60496742
chr8	60496742	61810694
chr8	61810694	62700794
chr8	62700794	63738181
chr8	63738181	64213717
chr8	64213717	65434821
chr8	65434821	66027223
chr8	66027223	67192984
chr8	67192984	67906170
chr8	67906170	69043584
chr8	69043584	69698854
chr8	69698854	70866028
chr8	70866028	72095316
chr8	72095316	73245042
chr8	73245042	74145897
chr8	74145897	75789321
chr8	75789321	77344124
chr8	77344124	79004686
chr8	79004686	79751084
chr8	79751084	80769781
chr8	80769781	81890433
chr8	81890433	82889706
chr8	82889706	83251084
chr8	83251084	84215379
chr8	84215379	84739519
chr8	84739519	85466846
chr8	85466846	86134220
chr8	86134220	87634019
chr8	87634019	89084082
chr8	89084082	89995461
chr8	89995461	90366352
chr8	90366352	91189607
chr8	91189607	92356916
chr8	92356916	94036367
chr8	94036367	95317394
chr8	95317394	96407960
chr8	96407960	97322461
chr8	97322461	98132233
chr8	98132233	99150986
chr8	99150986	100997421
chr8	100997421	102261175
chr8	102261175	103596288
chr8	103596288	104466230
chr8	104466230	105983800
chr8	105983800	107269192
chr8	107269192	108392928
chr8	108392928	108753047
chr8	108753047	109730467
chr8	109730467	111046510
chr8	111046510	112021275
chr8	112021275	112808096
chr8	112808096	113070381
chr8	113070381	113652657
chr8	113652657	114782860
chr8	114782860	115254122
chr8	115254122	116158163
chr8	116158163	117301287
chr8	117301287	118625415
chr8	118625415	118770017
chr8	118770017	119556257
chr8	119556257	120217923
chr8	120217923	121179524
chr8	121179524	121860131
chr8	121860131	122626404
chr8	122626404	123669844
chr8	123669844	124859809
chr8	124859809	125728808
chr8	125728808	126446619
chr8	126446619	127646284
chr8	127646284	128903000
chr8	128903000	130003673
chr8	130003673	131649499
chr8	131649499	133351144
chr8	133351144	134334755
chr8	134334755	135337816
chr8	135337816	136958599
chr8	136958599	138226902
chr8	138226902	139609474
chr8	139609474	140863730
chr8	140863730	141662151
chr8	141662151	143604765
chr8	143604765	144117339
chr8	144117339	145586103
chr8	145586103	146303867
chr9	10023	519897
chr9	519897	801226
chr9	801226	1460734
chr9	1460734	1919266
chr9	1919266	2758881
chr9	2758881	3981356
chr9	3981356	4661977
chr9	4661977	5274464
chr9	5274464	6217849
chr9	6217849	7087539
chr9	7087539	7759506
chr9	7759506	8376860
chr9	8376860	9013326
chr9	9013326	10879518
chr9	10879518	12046118
chr9	12046118	14058054
chr9	14058054	15337361
chr9	15337361	16658986
chr9	16658986	17488893
chr9	17488893	18636448
chr9	18636448	19741061
chr9	19741061	20470823
chr9	20470823	21154818
chr9	21154818	22204679
chr9	22204679	22970357
chr9	22970357	23647543
chr9	23647543	24722233
chr9	24722233	25426340
chr9	25426340	26453951
chr9	26453951	27173387
chr9	27173387	28517540
chr9	28517540	29595705
chr9	29595705	30340101
chr9	30340101	31588570
chr9	31588570	32257948
chr9	32257948	33532273
chr9	33532273	34110038
chr9	34110038	35953045
chr9	35953045	36530116
chr9	36530116	37684134
chr9	37684134	38719238
chr9	38719238	71175352
chr9	71175352	72292561
chr9	72292561	73399519
chr9	73399519	74251700
chr9	74251700	74671719
chr9	74671719	75519251
chr9	75519251	77507446
chr9	77507446	78313193
chr9	78313193	79451877
chr9	79451877	80132918
chr9	80132918	81155708
chr9	81155708	81871713
chr9	81871713	82967817
chr9	82967817	84209549
chr9	84209549	85137370
chr9	85137370	86070372
chr9	86070372	86769412
chr9	86769412	87815495
chr9	87815495	88868614
chr9	88868614	90135267
chr9	90135267	90293830
chr9	90293830	91391386
chr9	91391386	91757546
chr9	91757546	93101613
chr9	93101613	93861353
chr9	93861353	94335042
chr9	94335042	95810531
chr9	95810531	97017476
chr9	97017476	97684513
chr9	97684513	98549670
chr9	98549670	99431686
chr9	99431686	100921254
chr9	100921254	102017204
chr9	102017204	102598123
chr9	102598123	104244841
chr9	104244841	105041375
chr9	105041375	105968339
chr9	105968339	107548018
chr9	107548018	109153013
chr9	109153013	110635052
chr9	110635052	111140793
chr9	111140793	112194714
chr9	112194714	112864469
chr9	112864469	113646264
chr9	113646264	114718840
chr9	114718840	115694208
chr9	115694208	117312912
chr9	117312912	118914131
chr9	118914131	120030932
chr9	120030932	121320294
chr9	121320294	121858401
chr9	121858401	123634466
chr9	123634466	124431568
chr9	124431568	126052501
chr9	126052501	127186505
chr9	127186505	127570427
chr9	127570427	129283304
chr9	129283304	130895116
chr9	130895116	132086841
chr9	132086841	132894410
chr9	132894410	133915219
chr9	133915219	134435115
chr9	134435115	135299170
chr9	135299170	135867226
chr9	135867226	136611375
chr9	136611375	137339207
chr9	137339207	137723518
chr9	137723518	138323494
chr9	138323494	139072760
chr9	139072760	140099085
chr9	140099085	141144796
chr10	60523	832864
chr10	832864	1523118
chr10	1523118	2297537
chr10	2297537	2743897
chr10	2743897	3159533
chr10	3159533	3834653
chr10	3834653	4302628
chr10	4302628	5359721
chr10	5359721	6436806
chr10	6436806	7227090
chr10	7227090	8157706
chr10	8157706	9038675
chr10	9038675	10158912
chr10	10158912	11346838
chr10	11346838	12629952
chr10	12629952	13207647
chr10	13207647	13773844
chr10	13773844	14266417
chr10	14266417	15537080
chr10	15537080	16446008
chr10	16446008	17339530
chr10	17339530	18537544
chr10	18537544	19204422
chr10	19204422	20276131
chr10	20276131	20774075
chr10	20774075	21686492
chr10	21686492	23366266
chr10	23366266	24600286
chr10	24600286	25579636
chr10	25579636	26673486
chr10	26673486	28412436
chr10	28412436	29115020
chr10	29115020	30231142
chr10	30231142	30852025
chr10	30852025	31506768
chr10	31506768	32703421
chr10	32703421	33706590
chr10	33706590	34527884
chr10	34527884	35175222
chr10	35175222	36475589
chr10	36475589	36934218
chr10	36934218	37777729
chr10	37777729	43606687
chr10	43606687	44114616
chr10	44114616	45247977
chr10	45247977	47181209
chr10	47181209	49932967
chr10	49932967	50840012
chr10	50840012	52087512
chr10	52087512	52902461
chr10	52902461	53841952
chr10	53841952	54934857
chr10	54934857	55919743
chr10	55919743	57032097
chr10	57032097	57616711
chr10	57616711	58406487
chr10	58406487	59424119
chr10	59424119	60666092
chr10	60666092	61794635
chr10	61794635	62559172
chr10	62559172	63779932
chr10	63779932	64264617
chr10	64264617	65035112
chr10	65035112	65897659
chr10	65897659	66902539
chr10	66902539	67766973
chr10	67766973	68757766
chr10	68757766	69464721
chr10	69464721	70811427
chr10	70811427	71303930
chr10	71303930	72218685
chr10	72218685	72984697
chr10	72984697	73730384
chr10	73730384	75701447
chr10	75701447	77405756
chr10	77405756	79023897
chr10	79023897	79959467
chr10	79959467	81143146
chr10	81143146	81885660
chr10	81885660	82708234
chr10	82708234	83875288
chr10	83875288	84384967
chr10	84384967	85424324
chr10	85424324	86935241
chr10	86935241	87936574
chr10	87936574	89467724
chr10	89467724	90903678
chr10	90903678	91960142
chr10	91960142	93337202
chr10	93337202	94501126
chr10	94501126	95970547
chr10	95970547	97040588
chr10	97040588	98268670
chr10	98268670	99694366
chr10	99694366	100471632
chr10	100471632	101643236
chr10	101643236	102508969
chr10	102508969	103226627
chr10	103226627	105246873
chr10	105246873	106236607
chr10	106236607	107781305
chr10	107781305	108431205
chr10	108431205	108863729
chr10	108863729	109578055
chr10	109578055	110930030
chr10	110930030	112560743
chr10	112560743	114208707
chr10	114208707	116360753
chr10	116360753	117083212
chr10	117083212	118893338
chr10	118893338	119491902
chr10	119491902	120589989
chr10	120589989	121219725
chr10	121219725	122294351
chr10	122294351	123137458
chr10	123137458	124015357
chr10	124015357	125445731
chr10	125445731	126753189
chr10	126753189	128003981
chr10	128003981	129135913
chr10	129135913	129750386
chr10	129750386	130727364
chr10	130727364	131599149
chr10	131599149	132367515
chr10	132367515	133043624
chr10	133043624	133863459
chr10	133863459	134982793
chr10	134982793	135523865
chr11	70855	1472218
chr11	1472218	2737977
chr11	2737977	3134259
chr11	3134259	3661075
chr11	3661075	4405915
chr11	4405915	4747165
chr11	4747165	5323981
chr11	5323981	5771915
chr11	5771915	6565001
chr11	6565001	7268058
chr11	7268058	8098547
chr11	8098547	9370216
chr11	9370216	10427745
chr11	10427745	11362045
chr11	11362045	12471118
chr11	12471118	13629183
chr11	13629183	15322753
chr11	15322753	16385204
chr11	16385204	17751770
chr11	17751770	18793197
chr11	18793197	19981242
chr11	19981242	21261592
chr11	21261592	22537165
chr11	22537165	23673564
chr11	23673564	25165355
chr11	25165355	26097973
chr11	26097973	27792475
chr11	27792475	29292888
chr11	29292888	30625946
chr11	30625946	32276972
chr11	32276972	33385043
chr11	33385043	34529466
chr11	34529466	35383269
chr11	35383269	36181479
chr11	36181479	37115892
chr11	37115892	37842263
chr11	37842263	38611205
chr11	38611205	39386672
chr11	39386672	40094433
chr11	40094433	41414285
chr11	41414285	42855853
chr11	42855853	43955708
chr11	43955708	45706699
chr11	45706699	46382995
chr11	46382995	47587548
chr11	47587548	48730086
chr11	48730086	49792431
chr11	49792431	50316852
chr11	50316852	51092968
chr11	51092968	54695473
chr11	54695473	55206671
chr11	55206671	55997829
chr11	55997829	57214315
chr11	57214315	58458630
chr11	58458630	59811806
chr11	59811806	60538876
chr11	60538876	61683324
chr11	61683324	62780709
chr11	62780709	63584150
chr11	63584150	65570094
chr11	65570094	66838145
chr11	66838145	67700907
chr11	67700907	68810297
chr11	68810297	69356090
chr11	69356090	69974731
chr11	69974731	70926395
chr11	70926395	72179190
chr11	72179190	73672240
chr11	73672240	75027981
chr11	75027981	75888261
chr11	75888261	76883239
chr11	76883239	78511124
chr11	78511124	79374741
chr11	79374741	80800855
chr11	80800855	81211602
chr11	81211602	82840374
chr11	82840374	83045296
chr11	83045296	84382757
chr11	84382757	84964125
chr11	84964125	86426766
chr11	86426766	87633783
chr11	87633783	88284549
chr11	88284549	89479817
chr11	89479817	90954451
chr11	90954451	91535912
chr11	91535912	91946311
chr11	91946311	92666563
chr11	92666563	94035441
chr11	94035441	94681346
chr11	94681346	96047600
chr11	96047600	97674035
chr11	97674035	98887003
chr11	98887003	100417169
chr11	100417169	101398962
chr11	101398962	102836740
chr11	102836740	103493096
chr11	103493096	104297437
chr11	104297437	105502911
chr11	105502911	106522124
chr11	106522124	107843326
chr11	107843326	108823642
chr11	108823642	None
chr11	None	111048570
chr11	111048570	112221476
chr11	112221476	113107690
chr11	113107690	114187137
chr11	114187137	115172161
chr11	115172161	116459418
chr11	116459418	117788327
chr11	117788327	118962657
chr11	118962657	120534634
chr11	120534634	121204913
chr11	121204913	121833838
chr11	121833838	122481172
chr11	122481172	123510876
chr11	123510876	123994629
chr11	123994629	125049589
chr11	125049589	125985420
chr11	125985420	127199148
chr11	127199148	128352514
chr11	128352514	129452082
chr11	129452082	130341494
chr11	130341494	131218958
chr11	131218958	131873780
chr11	131873780	132586211
chr11	132586211	133697719
chr11	133697719	134346847
chr11	134346847	134946452
chr12	61107	669741
chr12	669741	1935983
chr12	1935983	2692746
chr12	2692746	3681079
chr12	3681079	4772215
chr12	4772215	6023946
chr12	6023946	6952660
chr12	6952660	7994997
chr12	7994997	9337987
chr12	9337987	10492428
chr12	10492428	11479368
chr12	11479368	12899831
chr12	12899831	14266758
chr12	14266758	15241296
chr12	15241296	16867284
chr12	16867284	17369713
chr12	17369713	18373624
chr12	18373624	19726646
chr12	19726646	20076917
chr12	20076917	21315966
chr12	21315966	22325755
chr12	22325755	22987679
chr12	22987679	24928744
chr12	24928744	26532811
chr12	26532811	27799203
chr12	27799203	29111553
chr12	29111553	29630784
chr12	29630784	30355166
chr12	30355166	30980097
chr12	30980097	32082360
chr12	32082360	33075761
chr12	33075761	33455515
chr12	33455515	37856717
chr12	37856717	38568802
chr12	38568802	40019163
chr12	40019163	40064682
chr12	40064682	41198874
chr12	41198874	42347363
chr12	42347363	43074644
chr12	43074644	43983111
chr12	43983111	44676786
chr12	44676786	45378955
chr12	45378955	46604899
chr12	46604899	47672436
chr12	47672436	48271504
chr12	48271504	49155905
chr12	49155905	50296096
chr12	50296096	51776016
chr12	51776016	53368586
chr12	53368586	55125959
chr12	55125959	57543103
chr12	57543103	58973673
chr12	58973673	60860873
chr12	60860873	61964961
chr12	61964961	63159449
chr12	63159449	63801572
chr12	63801572	65099183
chr12	65099183	66162560
chr12	66162560	67180887
chr12	67180887	67906381
chr12	67906381	68509457
chr12	68509457	69260779
chr12	69260779	70099837
chr12	70099837	71226829
chr12	71226829	71942689
chr12	71942689	73669731
chr12	73669731	75053209
chr12	75053209	76498688
chr12	76498688	77100991
chr12	77100991	77803587
chr12	77803587	79059283
chr12	79059283	80831044
chr12	80831044	81030178
chr12	81030178	82072843
chr12	82072843	83502028
chr12	83502028	84174878
chr12	84174878	85234422
chr12	85234422	86138242
chr12	86138242	86721662
chr12	86721662	88346851
chr12	88346851	89946781
chr12	89946781	91022199
chr12	91022199	92791164
chr12	92791164	93455674
chr12	93455674	94281561
chr12	94281561	95147802
chr12	95147802	96089737
chr12	96089737	97871604
chr12	97871604	98579587
chr12	98579587	99817232
chr12	99817232	100247240
chr12	100247240	101974506
chr12	101974506	102504960
chr12	102504960	103773721
chr12	103773721	104845349
chr12	104845349	105496083
chr12	105496083	106659471
chr12	106659471	107848652
chr12	107848652	109024725
chr12	109024725	109643152
chr12	109643152	110116178
chr12	110116178	111358112
chr12	111358112	113029496
chr12	113029496	114048617
chr12	114048617	115035949
chr12	115035949	116184485
chr12	116184485	117079935
chr12	117079935	117562436
chr12	117562436	118201775
chr12	118201775	119727683
chr12	119727683	120838305
chr12	120838305	123389778
chr12	123389778	124257461
chr12	124257461	125838417
chr12	125838417	126545213
chr12	126545213	127195223
chr12	127195223	128019998
chr12	128019998	128924937
chr12	128924937	129771024
chr12	129771024	130737321
chr12	130737321	131412850
chr12	131412850	132111974
chr12	132111974	133020274
chr12	133020274	133841511
chr13	19020013	19647211
chr13	19647211	20806153
chr13	20806153	21688904
chr13	21688904	22548702
chr13	22548702	23285165
chr13	23285165	23993990
chr13	23993990	24788603
chr13	24788603	25572125
chr13	25572125	26621709
chr13	26621709	27284527
chr13	27284527	28283059
chr13	28283059	29559598
chr13	29559598	30049867
chr13	30049867	31698426
chr13	31698426	32301689
chr13	32301689	33591464
chr13	33591464	34290790
chr13	34290790	35139735
chr13	35139735	36278055
chr13	36278055	37275110
chr13	37275110	38291602
chr13	38291602	39351888
chr13	39351888	39831321
chr13	39831321	40747232
chr13	40747232	41852025
chr13	41852025	42789002
chr13	42789002	43701343
chr13	43701343	45243639
chr13	45243639	46302653
chr13	46302653	47589227
chr13	47589227	48729624
chr13	48729624	51559570
chr13	51559570	53339520
chr13	53339520	55154316
chr13	55154316	56437116
chr13	56437116	57554224
chr13	57554224	59301217
chr13	59301217	60089772
chr13	60089772	60854356
chr13	60854356	61593740
chr13	61593740	63401368
chr13	63401368	64202642
chr13	64202642	65339575
chr13	65339575	66202811
chr13	66202811	67509412
chr13	67509412	69005565
chr13	69005565	69802499
chr13	69802499	70725253
chr13	70725253	71376679
chr13	71376679	71978290
chr13	71978290	72959890
chr13	72959890	73952056
chr13	73952056	74490884
chr13	74490884	75200024
chr13	75200024	76244028
chr13	76244028	76853253
chr13	76853253	78033940
chr13	78033940	79242944
chr13	79242944	80718918
chr13	80718918	81726935
chr13	81726935	82949309
chr13	82949309	84133413
chr13	84133413	85036417
chr13	85036417	86321572
chr13	86321572	87041798
chr13	87041798	88559139
chr13	88559139	90175701
chr13	90175701	91083577
chr13	91083577	92296020
chr13	92296020	92913551
chr13	92913551	94207218
chr13	94207218	94863072
chr13	94863072	95978892
chr13	95978892	96608513
chr13	96608513	98313853
chr13	98313853	99266018
chr13	99266018	100106198
chr13	100106198	101571438
chr13	101571438	102104098
chr13	102104098	103053192
chr13	103053192	103685706
[truncated: 585 more rows]

## Sheet: ST2c
Supplementary Table 2c: ASN population LD blocks using pre-computed cutoff points determined using Ldetect software
Chrom	LD_Start	LD_End
chr1	10583	1976558
chr1	1976558	3492739
chr1	3492739	4543012
chr1	4543012	5914790
chr1	5914790	7365002
chr1	7365002	9002909
chr1	9002909	10755520
chr1	10755520	11708678
chr1	11708678	13811000
chr1	13811000	14893157
chr1	14893157	17875820
chr1	17875820	20304720
chr1	20304720	22145806
chr1	22145806	23916165
chr1	23916165	25516893
chr1	25516893	27400828
chr1	27400828	30161897
chr1	30161897	32043093
chr1	32043093	34941267
chr1	34941267	36857533
chr1	36857533	39550621
chr1	39550621	41288115
chr1	41288115	43366279
chr1	43366279	45082440
chr1	45082440	47651005
chr1	47651005	50644820
chr1	50644820	54973025
chr1	54973025	56412729
chr1	56412729	57021655
chr1	57021655	58196478
chr1	58196478	59188245
chr1	59188245	60232862
chr1	60232862	62109988
chr1	62109988	64095111
chr1	64095111	65041376
chr1	65041376	66774011
chr1	66774011	68477862
chr1	68477862	69687902
chr1	69687902	72285466
chr1	72285466	74327078
chr1	74327078	76728120
chr1	76728120	79112109
chr1	79112109	80341732
chr1	80341732	81990569
chr1	81990569	83991644
chr1	83991644	86012417
chr1	86012417	88408033
chr1	88408033	90066205
chr1	90066205	92938314
chr1	92938314	93568956
chr1	93568956	96151207
chr1	96151207	97949735
chr1	97949735	99555996
chr1	99555996	101849109
chr1	101849109	102644327
chr1	102644327	105413133
chr1	105413133	106767764
chr1	106767764	110304092
chr1	110304092	112347256
chr1	112347256	114872038
chr1	114872038	118104015
chr1	118104015	142545956
chr1	142545956	147914609
chr1	147914609	152537155
chr1	152537155	153397055
chr1	153397055	156616039
chr1	156616039	157982579
chr1	157982579	159953315
chr1	159953315	162888864
chr1	162888864	164954020
chr1	164954020	168175845
chr1	168175845	170169621
chr1	170169621	172932966
chr1	172932966	175387679
chr1	175387679	177937441
chr1	177937441	181116840
chr1	181116840	183553326
chr1	183553326	185513153
chr1	185513153	187902801
chr1	187902801	189761326
chr1	189761326	191285922
chr1	191285922	192349898
chr1	192349898	194108441
chr1	194108441	195996764
chr1	195996764	198541162
chr1	198541162	201071502
chr1	201071502	203648600
chr1	203648600	205271007
chr1	205271007	208809070
chr1	208809070	209837236
chr1	209837236	212344930
chr1	212344930	213936674
chr1	213936674	216245665
chr1	216245665	218342976
chr1	218342976	220125116
chr1	220125116	221151629
chr1	221151629	223654495
chr1	223654495	225965358
chr1	225965358	228102732
chr1	228102732	230437262
chr1	230437262	232090252
chr1	232090252	233369741
chr1	233369741	234839043
chr1	234839043	236202705
chr1	236202705	237419495
chr1	237419495	238922341
chr1	238922341	239566655
chr1	239566655	241169137
chr1	241169137	242420888
chr1	242420888	244512787
chr1	244512787	245966754
chr1	245966754	247344630
chr1	247344630	249239466
chr2	10133	2645948
chr2	2645948	4015665
chr2	4015665	5529462
chr2	5529462	6967943
chr2	6967943	8233381
chr2	8233381	10083949
chr2	10083949	12419387
chr2	12419387	14757213
chr2	14757213	16549757
chr2	16549757	17515331
chr2	17515331	19692796
chr2	19692796	20402938
chr2	20402938	23703344
chr2	23703344	26209579
chr2	26209579	29456860
chr2	29456860	31111554
chr2	31111554	33363144
chr2	33363144	34016909
chr2	34016909	35344928
chr2	35344928	36123028
chr2	36123028	38132911
chr2	38132911	40508070
chr2	40508070	42336744
chr2	42336744	44322128
chr2	44322128	46482634
chr2	46482634	47806040
chr2	47806040	49116026
chr2	49116026	50818256
chr2	50818256	52491017
chr2	52491017	53355222
chr2	53355222	54686322
chr2	54686322	57429035
chr2	57429035	57726344
chr2	57726344	60728136
chr2	60728136	62429044
chr2	62429044	64625085
chr2	64625085	65936332
chr2	65936332	67227248
chr2	67227248	69375742
chr2	69375742	70579922
chr2	70579922	73125598
chr2	73125598	75409633
chr2	75409633	76647377
chr2	76647377	78080014
chr2	78080014	80049718
chr2	80049718	83606074
chr2	83606074	85893191
chr2	85893191	86961902
chr2	86961902	89260647
chr2	89260647	95326810
chr2	95326810	98629109
chr2	98629109	100544638
chr2	100544638	101557234
chr2	101557234	103759508
chr2	103759508	104714865
chr2	104714865	107780932
chr2	107780932	108996018
chr2	108996018	113477211
chr2	113477211	116413651
chr2	116413651	119581738
chr2	119581738	121554317
chr2	121554317	123396005
chr2	123396005	124932993
chr2	124932993	127752362
chr2	127752362	129313014
chr2	129313014	131767129
chr2	131767129	132783544
chr2	132783544	135158693
chr2	135158693	136977976
chr2	136977976	139414544
chr2	139414544	140903958
chr2	140903958	142793066
chr2	142793066	144519478
chr2	144519478	147956520
chr2	147956520	150473193
chr2	150473193	153465188
chr2	153465188	155637294
chr2	155637294	157560495
chr2	157560495	159577115
chr2	159577115	161769655
chr2	161769655	163503840
chr2	163503840	165203973
chr2	165203973	167128466
chr2	167128466	167490428
chr2	167490428	169588988
chr2	169588988	171319417
chr2	171319417	174122650
chr2	174122650	177074923
chr2	177074923	179244504
chr2	179244504	181812685
chr2	181812685	184145976
chr2	184145976	186242927
chr2	186242927	188897634
chr2	188897634	191973455
chr2	191973455	195123359
chr2	195123359	197140125
chr2	197140125	198142797
chr2	198142797	200513800
chr2	200513800	201357289
chr2	201357289	202542475
chr2	202542475	205363047
chr2	205363047	208120624
chr2	208120624	209941699
chr2	209941699	212194775
chr2	212194775	214013653
chr2	214013653	215573226
chr2	215573226	218395307
chr2	218395307	219853567
chr2	219853567	222520904
chr2	222520904	224859323
chr2	224859323	227665678
chr2	227665678	229593915
chr2	229593915	232191250
chr2	232191250	233550713
chr2	233550713	234883167
chr2	234883167	236066960
chr2	236066960	237201266
chr2	237201266	238502381
chr2	238502381	240328718
chr2	240328718	241459497
chr2	241459497	242489409
chr2	242489409	243188920
chr3	60157	1164057
chr3	1164057	2863911
chr3	2863911	5108349
chr3	5108349	6724765
chr3	6724765	8051951
chr3	8051951	9899533
chr3	9899533	11019488
chr3	11019488	12860229
chr3	12860229	14816750
chr3	14816750	16664547
chr3	16664547	17891041
chr3	17891041	19789003
chr3	19789003	20375345
chr3	20375345	21643707
chr3	21643707	22647520
chr3	22647520	25460047
chr3	25460047	27611777
chr3	27611777	30484625
chr3	30484625	31726060
chr3	31726060	32845663
chr3	32845663	33989246
chr3	33989246	35283408
chr3	35283408	38353505
chr3	38353505	40796032
chr3	40796032	42540434
chr3	42540434	45151576
chr3	45151576	45992977
chr3	45992977	47793553
chr3	47793553	51831792
chr3	51831792	53739789
chr3	53739789	55348768
chr3	55348768	56847831
chr3	56847831	59704331
chr3	59704331	61958750
chr3	61958750	63669879
chr3	63669879	65273079
chr3	65273079	66270447
chr3	66270447	67742901
chr3	67742901	68646218
chr3	68646218	70449028
chr3	70449028	72528426
chr3	72528426	74398940
chr3	74398940	75717386
chr3	75717386	79024471
chr3	79024471	82022276
chr3	82022276	82527031
chr3	82527031	84961750
chr3	84961750	87590636
chr3	87590636	89775033
chr3	89775033	94256163
chr3	94256163	96058347
chr3	96058347	98215516
chr3	98215516	100553825
chr3	100553825	102013409
chr3	102013409	104581613
chr3	104581613	106834267
chr3	106834267	108638228
chr3	108638228	110929056
chr3	110929056	112455117
chr3	112455117	113650586
chr3	113650586	115605661
chr3	115605661	116898042
chr3	116898042	118903462
chr3	118903462	120523073
chr3	120523073	121822627
chr3	121822627	123198641
chr3	123198641	124936549
chr3	124936549	126214330
chr3	126214330	128194796
chr3	128194796	130024576
chr3	130024576	131836226
chr3	131836226	133573172
chr3	133573172	135268752
chr3	135268752	137727495
chr3	137727495	139847179
chr3	139847179	141034491
chr3	141034491	142985100
chr3	142985100	144169280
chr3	144169280	146285125
chr3	146285125	148637333
chr3	148637333	150530065
chr3	150530065	151256352
chr3	151256352	152222143
chr3	152222143	153407526
chr3	153407526	154485881
chr3	154485881	157311596
chr3	157311596	159155377
chr3	159155377	161620009
chr3	161620009	165935731
chr3	165935731	168270619
chr3	168270619	172048457
chr3	172048457	175051223
chr3	175051223	176928975
chr3	176928975	179376588
chr3	179376588	181637723
chr3	181637723	184112682
chr3	184112682	186230742
chr3	186230742	188951597
chr3	188951597	190355509
chr3	190355509	192344597
chr3	192344597	193962112
chr3	193962112	195349066
chr3	195349066	196728482
chr3	196728482	197946622
chr4	10240	695912
chr4	695912	2306583
chr4	2306583	3384844
chr4	3384844	4989588
chr4	4989588	6325242
chr4	6325242	7663190
chr4	7663190	9217084
chr4	9217084	10698980
chr4	10698980	13004348
chr4	13004348	15148516
chr4	15148516	16579695
chr4	16579695	18752293
chr4	18752293	20486651
chr4	20486651	22319288
chr4	22319288	24135369
chr4	24135369	26836317
chr4	26836317	29313037
chr4	29313037	31205517
chr4	31205517	32593453
chr4	32593453	35151582
chr4	35151582	36540810
chr4	36540810	38203464
chr4	38203464	40588393
chr4	40588393	42664297
chr4	42664297	45189270
chr4	45189270	47412253
chr4	47412253	47997645
chr4	47997645	54658565
chr4	54658565	57458942
chr4	57458942	59360441
chr4	59360441	60608829
chr4	60608829	61598883
chr4	61598883	63843686
chr4	63843686	64504614
chr4	64504614	65592228
chr4	65592228	68741353
chr4	68741353	69601808
chr4	69601808	72418006
chr4	72418006	74888947
chr4	74888947	77718852
chr4	77718852	78969420
chr4	78969420	80322665
chr4	80322665	82691669
chr4	82691669	83510372
chr4	83510372	84922154
chr4	84922154	87214993
chr4	87214993	89236855
chr4	89236855	90500460
chr4	90500460	92166236
chr4	92166236	94233168
chr4	94233168	95896913
chr4	95896913	97912515
chr4	97912515	99040831
chr4	99040831	101711689
chr4	101711689	102707193
chr4	102707193	105305539
chr4	105305539	107501341
chr4	107501341	109780301
chr4	109780301	111466213
chr4	111466213	114687995
chr4	114687995	118224725
chr4	118224725	119932620
chr4	119932620	121393951
chr4	121393951	122458885
chr4	122458885	124387408
chr4	124387408	126751239
chr4	126751239	127833073
chr4	127833073	130591861
chr4	130591861	131284305
chr4	131284305	133742120
chr4	133742120	134111558
chr4	134111558	135954226
chr4	135954226	137831942
chr4	137831942	139197294
chr4	139197294	143226784
chr4	143226784	145025810
chr4	145025810	148834277
chr4	148834277	150683433
chr4	150683433	152782184
chr4	152782184	154122370
chr4	154122370	155546839
chr4	155546839	157596253
chr4	157596253	158455363
chr4	158455363	161798202
chr4	161798202	161998784
chr4	161998784	163413310
chr4	163413310	164173867
chr4	164173867	165472929
chr4	165472929	166593952
chr4	166593952	167853560
chr4	167853560	169676676
chr4	169676676	171209592
chr4	171209592	172963785
chr4	172963785	174857042
chr4	174857042	176376342
chr4	176376342	179391123
chr4	179391123	180547908
chr4	180547908	183473284
chr4	183473284	184930023
chr4	184930023	186544264
chr4	186544264	187867533
chr4	187867533	189155114
chr4	189155114	189915203
chr4	189915203	191043594
chr5	11940	1483180
chr5	1483180	2851269
chr5	2851269	4940255
chr5	4940255	5973036
chr5	5973036	8445402
chr5	8445402	9873006
chr5	9873006	11849590
chr5	11849590	13611631
chr5	13611631	17400372
chr5	17400372	18850604
chr5	18850604	22657008
chr5	22657008	23719696
chr5	23719696	26124488
chr5	26124488	27316597
chr5	27316597	29594524
chr5	29594524	31391126
chr5	31391126	33500818
chr5	33500818	35048572
chr5	35048572	36433092
chr5	36433092	38802788
chr5	38802788	40287729
chr5	40287729	42858747
chr5	42858747	44045380
chr5	44045380	49410915
chr5	49410915	51701349
chr5	51701349	53748307
chr5	53748307	55416658
chr5	55416658	57339005
chr5	57339005	58523945
chr5	58523945	61247124
chr5	61247124	62536058
chr5	62536058	65205427
chr5	65205427	67851517
chr5	67851517	71419711
chr5	71419711	73759199
chr5	73759199	76221198
chr5	76221198	77283975
chr5	77283975	79394041
chr5	79394041	79992758
chr5	79992758	81237241
chr5	81237241	83972773
chr5	83972773	85767057
chr5	85767057	87438020
chr5	87438020	90423339
chr5	90423339	91840637
chr5	91840637	93811097
chr5	93811097	96374150
chr5	96374150	97316375
chr5	97316375	99261850
chr5	99261850	100595234
chr5	100595234	103181351
chr5	103181351	104854817
chr5	104854817	106909041
chr5	106909041	109233618
chr5	109233618	110896791
chr5	110896791	112302830
chr5	112302830	113777986
chr5	113777986	114751103
chr5	114751103	115879777
chr5	115879777	117082850
chr5	117082850	118675901
chr5	118675901	119669846
chr5	119669846	122002653
chr5	122002653	123240670
chr5	123240670	125128470
chr5	125128470	127345468
chr5	127345468	129519147
chr5	129519147	132007338
chr5	132007338	134777577
chr5	134777577	136376492
chr5	136376492	139409053
chr5	139409053	141852077
chr5	141852077	143592976
chr5	143592976	146434800
chr5	146434800	148549094
chr5	148549094	150911275
chr5	150911275	152504700
chr5	152504700	153899307
chr5	153899307	156627810
chr5	156627810	157585548
chr5	157585548	159866697
chr5	159866697	161694489
chr5	161694489	163803607
chr5	163803607	165314602
chr5	165314602	167651859
chr5	167651859	169330611
chr5	169330611	170904981
chr5	170904981	172766002
chr5	172766002	174167623
chr5	174167623	176509938
chr5	176509938	179096402
chr5	179096402	179828925
chr5	179828925	180885156
chr6	73924	1452083
chr6	1452083	2510436
chr6	2510436	4317569
chr6	4317569	5057821
chr6	5057821	6752797
chr6	6752797	7975637
chr6	7975637	9020424
chr6	9020424	10627076
chr6	10627076	12365129
chr6	12365129	13835830
chr6	13835830	15819455
chr6	15819455	18404207
chr6	18404207	19672632
chr6	19672632	23199920
chr6	23199920	24397129
chr6	24397129	26141757
chr6	26141757	26697553
chr6	26697553	28901402
chr6	28901402	29688046
chr6	29688046	30458591
chr6	30458591	31054923
chr6	31054923	31571894
chr6	31571894	32682590
chr6	32682590	33209310
chr6	33209310	35757007
chr6	35757007	37112681
chr6	37112681	39022823
chr6	39022823	40434091
chr6	40434091	41712058
chr6	41712058	43728479
chr6	43728479	45405389
chr6	45405389	46731324
chr6	46731324	49957253
chr6	49957253	51171480
chr6	51171480	52828869
chr6	52828869	54293678
chr6	54293678	56105707
chr6	56105707	58138275
chr6	58138275	62693823
chr6	62693823	64607599
chr6	64607599	65764776
chr6	65764776	67152226
chr6	67152226	67906136
chr6	67906136	70361484
chr6	70361484	71609005
chr6	71609005	73451673
chr6	73451673	74404068
chr6	74404068	76627639
chr6	76627639	77415155
chr6	77415155	78385577
chr6	78385577	80691482
chr6	80691482	82389311
chr6	82389311	84742341
chr6	84742341	87650463
chr6	87650463	88857392
chr6	88857392	91092352
chr6	91092352	92348705
chr6	92348705	94329244
chr6	94329244	96490134
chr6	96490134	98021637
chr6	98021637	100875516
chr6	100875516	102201824
chr6	102201824	104733704
chr6	104733704	107240062
chr6	107240062	108858460
chr6	108858460	110305071
chr6	110305071	112345456
chr6	112345456	114220833
chr6	114220833	116703926
chr6	116703926	118099644
chr6	118099644	120338588
chr6	120338588	122348428
chr6	122348428	124099184
chr6	124099184	127540155
chr6	127540155	129860936
chr6	129860936	130935711
chr6	130935711	132891666
chr6	132891666	134243918
chr6	134243918	136223664
chr6	136223664	138245745
chr6	138245745	139976687
chr6	139976687	142288533
chr6	142288533	145518030
chr6	145518030	147740272
chr6	147740272	150755000
chr6	150755000	152702385
chr6	152702385	153993093
chr6	153993093	157641072
chr6	157641072	159542046
chr6	159542046	162169452
chr6	162169452	164360067
chr6	164360067	166831724
chr6	166831724	168042468
chr6	168042468	169236971
chr6	169236971	169946666
chr6	169946666	171051270
chr7	16161	1240747
chr7	1240747	2482290
chr7	2482290	4142453
chr7	4142453	5455378
chr7	5455378	6573087
chr7	6573087	8162908
chr7	8162908	9034684
chr7	9034684	10882977
chr7	10882977	12635431
chr7	12635431	14141608
chr7	14141608	15591421
chr7	15591421	16902524
chr7	16902524	18759806
chr7	18759806	21715378
chr7	21715378	23472033
chr7	23472033	26552261
chr7	26552261	28554104
chr7	28554104	31137289
chr7	31137289	33997077
chr7	33997077	36120153
chr7	36120153	37910002
chr7	37910002	38965629
chr7	38965629	40482673
chr7	40482673	41853482
chr7	41853482	43448397
chr7	43448397	45523273
chr7	45523273	47104276
chr7	47104276	49211848
chr7	49211848	51674880
chr7	51674880	53176376
chr7	53176376	54905959
chr7	54905959	57382764
chr7	57382764	62560322
chr7	62560322	63624322
chr7	63624322	67371495
chr7	67371495	68458764
chr7	68458764	69083424
chr7	69083424	71874126
chr7	71874126	74408523
chr7	74408523	76499312
chr7	76499312	78460635
chr7	78460635	80333322
chr7	80333322	81714243
chr7	81714243	83567546
chr7	83567546	85570789
chr7	85570789	88189329
chr7	88189329	89727016
chr7	89727016	92494245
chr7	92494245	94058818
chr7	94058818	96432923
chr7	96432923	99365083
chr7	99365083	100526290
chr7	100526290	101731498
chr7	101731498	103197911
chr7	103197911	103793049
chr7	103793049	105681590
chr7	105681590	107460001
chr7	107460001	109296362
chr7	109296362	112125631
chr7	112125631	113714773
chr7	113714773	116918288
chr7	116918288	119074052
chr7	119074052	120269171
chr7	120269171	122992990
chr7	122992990	125775066
chr7	125775066	126869221
chr7	126869221	129589868
chr7	129589868	131635483
chr7	131635483	133736374
chr7	133736374	136111689
chr7	136111689	138309842
chr7	138309842	139664085
chr7	139664085	141678417
chr7	141678417	142659758
chr7	142659758	145171422
chr7	145171422	146397904
chr7	146397904	147996405
chr7	147996405	149500992
chr7	149500992	151627123
chr7	151627123	153033738
chr7	153033738	154964316
chr7	154964316	156153106
chr7	156153106	157635553
chr7	157635553	159128575
chr8	10422	720794
chr8	720794	1162980
chr8	1162980	1957008
chr8	1957008	2791987
chr8	2791987	3361150
chr8	3361150	3704713
chr8	3704713	4480374
chr8	4480374	5146927
chr8	5146927	6142331
chr8	6142331	7153079
chr8	7153079	9099581
chr8	9099581	10118214
chr8	10118214	11088309
chr8	11088309	13394643
chr8	13394643	13945976
chr8	13945976	15709611
chr8	15709611	17300379
chr8	17300379	18671055
chr8	18671055	19221080
chr8	19221080	21137819
chr8	21137819	21901218
chr8	21901218	23028335
chr8	23028335	24672501
chr8	24672501	25803980
chr8	25803980	26900699
chr8	26900699	28621013
chr8	28621013	30534248
chr8	30534248	33044704
chr8	33044704	34782251
chr8	34782251	38017236
chr8	38017236	40054435
chr8	40054435	42472800
chr8	42472800	46841315
chr8	46841315	51464550
chr8	51464550	53885291
chr8	53885291	54450917
chr8	54450917	56115358
chr8	56115358	57212083
chr8	57212083	59047312
chr8	59047312	60470380
chr8	60470380	62328609
chr8	62328609	63426172
chr8	63426172	67414034
chr8	67414034	69121036
chr8	69121036	72289571
chr8	72289571	73836479
chr8	73836479	75684315
chr8	75684315	77379451
chr8	77379451	79751440
chr8	79751440	82016264
chr8	82016264	83727741
chr8	83727741	85110408
chr8	85110408	85978701
chr8	85978701	87634581
chr8	87634581	89085481
chr8	89085481	90639838
chr8	90639838	94303592
chr8	94303592	96205877
chr8	96205877	99403074
chr8	99403074	102260923
chr8	102260923	104123443
chr8	104123443	107270871
chr8	107270871	109011379
chr8	109011379	115011595
chr8	115011595	116407568
chr8	116407568	121179006
chr8	121179006	123780420
chr8	123780420	126401023
chr8	126401023	128708975
chr8	128708975	130003883
chr8	130003883	131959714
chr8	131959714	133351162
chr8	133351162	134571618
chr8	134571618	137120280
chr8	137120280	139607999
chr8	139607999	141104817
chr8	141104817	142610656
chr8	142610656	144214290
chr8	144214290	146303867
chr9	10023	1197526
chr9	1197526	2235668
chr9	2235668	2696555
chr9	2696555	4320425
chr9	4320425	6144486
chr9	6144486	7759242
chr9	7759242	8919319
chr9	8919319	11103346
chr9	11103346	12046746
chr9	12046746	14836080
chr9	14836080	16364351
chr9	16364351	18259692
chr9	18259692	20288119
chr9	20288119	21938460
chr9	21938460	23424761
chr9	23424761	24746694
chr9	24746694	25893114
chr9	25893114	27748183
chr9	27748183	29938115
chr9	29938115	31118133
chr9	31118133	31884883
chr9	31884883	33578941
chr9	33578941	34701352
chr9	34701352	36745892
chr9	36745892	38717181
chr9	38717181	69989375
chr9	69989375	72513605
chr9	72513605	74398785
chr9	74398785	75708879
chr9	75708879	77543688
chr9	77543688	79221991
chr9	79221991	81510359
chr9	81510359	82682883
chr9	82682883	83713504
chr9	83713504	86070382
chr9	86070382	87812366
chr9	87812366	89493523
chr9	89493523	92343050
chr9	92343050	94165486
chr9	94165486	96486026
chr9	96486026	98547390
chr9	98547390	100312284
chr9	100312284	102281873
chr9	102281873	104225480
chr9	104225480	105967984
chr9	105967984	107829748
chr9	107829748	110368474
chr9	110368474	112864469
chr9	112864469	116400502
chr9	116400502	119530000
chr9	119530000	122117725
chr9	122117725	124681439
chr9	124681439	126973204
chr9	126973204	128927728
chr9	128927728	130597604
chr9	130597604	132047808
chr9	132047808	133641809
chr9	133641809	134137629
chr9	134137629	134722557
chr9	134722557	136612240
chr9	136612240	138198537
chr9	138198537	139575793
chr9	139575793	141144796
chr10	60523	1523806
chr10	1523806	3350441
chr10	3350441	4806512
chr10	4806512	5699799
chr10	5699799	7227267
chr10	7227267	9038946
chr10	9038946	10631304
chr10	10631304	12641986
chr10	12641986	14492886
chr10	14492886	16679279
chr10	16679279	18537267
chr10	18537267	20311057
chr10	20311057	22282803
chr10	22282803	24787658
chr10	24787658	26886615
chr10	26886615	28736450
chr10	28736450	30287398
chr10	30287398	31908498
chr10	31908498	33908655
chr10	33908655	35148611
chr10	35148611	36940703
chr10	36940703	43606459
chr10	43606459	45448031
chr10	45448031	47753192
chr10	47753192	50452594
chr10	50452594	52087335
chr10	52087335	53791679
chr10	53791679	55868180
chr10	55868180	57129543
chr10	57129543	59159037
chr10	59159037	60514349
chr10	60514349	62085190
chr10	62085190	64198067
chr10	64198067	66313715
chr10	66313715	67549741
chr10	67549741	68757629
chr10	68757629	71054709
chr10	71054709	72673145
chr10	72673145	73730459
chr10	73730459	75699350
chr10	75699350	79466701
chr10	79466701	80464093
chr10	80464093	82568989
chr10	82568989	83992480
chr10	83992480	85920709
chr10	85920709	87935759
chr10	87935759	89149284
chr10	89149284	90787308
chr10	90787308	92107336
chr10	92107336	95362627
chr10	95362627	97064851
chr10	97064851	100365649
chr10	100365649	102471756
chr10	102471756	106139565
chr10	106139565	107883349
chr10	107883349	110353327
chr10	110353327	112170486
chr10	112170486	115752990
chr10	115752990	117845895
chr10	117845895	120999638
chr10	120999638	122365962
chr10	122365962	123230919
chr10	123230919	124236219
chr10	124236219	126143063
chr10	126143063	127822235
chr10	127822235	129962926
chr10	129962926	130764813
chr10	130764813	131740761
chr10	131740761	132689305
chr10	132689305	134038000
chr10	134038000	134609626
chr10	134609626	135523865
chr11	70855	2739889
chr11	2739889	4466102
chr11	4466102	6565001
chr11	6565001	7461582
chr11	7461582	9555470
chr11	9555470	10371326
chr11	10371326	12639329
chr11	12639329	13629455
chr11	13629455	15465638
chr11	15465638	17579783
chr11	17579783	19569432
chr11	19569432	21205247
chr11	21205247	22387440
chr11	22387440	23673700
chr11	23673700	25165355
chr11	25165355	26754938
chr11	26754938	29492526
chr11	29492526	30687490
chr11	30687490	32062967
chr11	32062967	34218653
chr11	34218653	35442608
chr11	35442608	38611205
chr11	38611205	40720444
chr11	40720444	44785739
chr11	44785739	47003018
chr11	47003018	54695473
chr11	54695473	55753843
chr11	55753843	58455947
chr11	58455947	59251804
chr11	59251804	62201641
chr11	62201641	63804569
chr11	63804569	67409718
chr11	67409718	69511630
chr11	69511630	70926292
chr11	70926292	72895950
chr11	72895950	74161461
chr11	74161461	76796159
chr11	76796159	79374417
chr11	79374417	81211602
chr11	81211602	84214592
chr11	84214592	86425728
chr11	86425728	88282078
chr11	88282078	90954609
chr11	90954609	92731401
chr11	92731401	94987750
chr11	94987750	97673784
chr11	97673784	98704141
chr11	98704141	100417158
chr11	100417158	102156568
chr11	102156568	103493096
chr11	103493096	105501639
chr11	105501639	106254207
chr11	106254207	107843998
chr11	107843998	109178131
chr11	109178131	111986912
chr11	111986912	114123539
chr11	114123539	115428159
chr11	115428159	116383543
chr11	116383543	117901740
chr11	117901740	118900987
chr11	118900987	120771784
chr11	120771784	121769481
chr11	121769481	123339958
chr11	123339958	124496119
chr11	124496119	126773879
chr11	126773879	128188777
chr11	128188777	130049774
chr11	130049774	131429519
chr11	131429519	132723635
chr11	132723635	134204731
chr11	134204731	134946452
chr12	61107	1739022
chr12	1739022	3562408
chr12	3562408	5198073
chr12	5198073	6521657
chr12	6521657	7995249
chr12	7995249	9032964
chr12	9032964	10480872
chr12	10480872	11479021
chr12	11479021	14428647
chr12	14428647	15819892
chr12	15819892	18628021
chr12	18628021	20523761
chr12	20523761	21757656
chr12	21757656	24562053
chr12	24562053	26532779
chr12	26532779	28193227
chr12	28193227	29630824
chr12	29630824	31158540
chr12	31158540	32164007
chr12	32164007	34339984
chr12	34339984	37856717
chr12	37856717	41198904
chr12	41198904	42347745
chr12	42347745	43212362
chr12	43212362	45209544
chr12	45209544	47786056
chr12	47786056	50165690
chr12	50165690	52569388
chr12	52569388	54688126
chr12	54688126	56798800
chr12	56798800	59994970
chr12	59994970	61965142
chr12	61965142	66069782
chr12	66069782	68247434
chr12	68247434	70817279
chr12	70817279	73150803
chr12	73150803	73733754
chr12	73733754	76517683
chr12	76517683	78400195
chr12	78400195	80115362
chr12	80115362	82073040
chr12	82073040	82916340
chr12	82916340	84116732
chr12	84116732	86138538
chr12	86138538	89682291
chr12	89682291	92066155
chr12	92066155	93932579
chr12	93932579	95148195
chr12	95148195	96440950
chr12	96440950	98579855
chr12	98579855	100780655
chr12	100780655	103124291
chr12	103124291	104845403
chr12	104845403	106156520
chr12	106156520	107548626
chr12	107548626	109270450
chr12	109270450	113028429
chr12	113028429	114181109
chr12	114181109	116184485
chr12	116184485	117008585
chr12	117008585	118149097
chr12	118149097	119859279
chr12	119859279	122015993
chr12	122015993	124721969
chr12	124721969	127195165
chr12	127195165	128810029
chr12	128810029	130612385
chr12	130612385	132015258
chr12	132015258	133841511
chr13	19020013	21479583
chr13	21479583	22386165
chr13	22386165	23326260
chr13	23326260	24531980
chr13	24531980	25728172
chr13	25728172	27283456
chr13	27283456	29435976
chr13	29435976	30625939
chr13	30625939	32301388
chr13	32301388	34095663
chr13	34095663	35433085
chr13	35433085	37137641
chr13	37137641	38965013
chr13	38965013	40859944
chr13	40859944	42118645
chr13	42118645	43701331
chr13	43701331	45477002
chr13	45477002	47324761
chr13	47324761	49286438
chr13	49286438	51723601
chr13	51723601	52762360
chr13	52762360	55562140
chr13	55562140	56437606
chr13	56437606	58829326
chr13	58829326	61392802
chr13	61392802	63401793
chr13	63401793	65340421
chr13	65340421	67714796
chr13	67714796	69224436
chr13	69224436	71978413
chr13	71978413	73934089
chr13	73934089	75806473
chr13	75806473	77411044
chr13	77411044	79469556
chr13	79469556	81726772
chr13	81726772	85035885
chr13	85035885	88190873
chr13	88190873	90177954
chr13	90177954	92913093
chr13	92913093	94779284
chr13	94779284	96087870
chr13	96087870	97768098
chr13	97768098	98959258
chr13	98959258	100633111
chr13	100633111	102104031
chr13	102104031	104167666
chr13	104167666	105863276
chr13	105863276	107114897
chr13	107114897	109121210
chr13	109121210	110188241
chr13	110188241	112137059
chr13	112137059	113609604
chr13	113609604	115109853
chr14	19002084	21191945
chr14	21191945	23018665
chr14	23018665	24905123
chr14	24905123	27533181
chr14	27533181	29862815
chr14	29862815	32382215
chr14	32382215	34815856
chr14	34815856	35858508
chr14	35858508	40256601
chr14	40256601	40342047
chr14	40342047	43066701
chr14	43066701	43802046
chr14	43802046	46081716
chr14	46081716	47458806
chr14	47458806	49956535
chr14	49956535	52048393
chr14	52048393	53474136
chr14	53474136	53997290
chr14	53997290	55234112
chr14	55234112	56216787
chr14	56216787	57481315
chr14	57481315	59448878
chr14	59448878	62043302
chr14	62043302	63291421
chr14	63291421	65225452
chr14	65225452	67889283
chr14	67889283	71102397
chr14	71102397	72890154
chr14	72890154	74832030
chr14	74832030	77605473
chr14	77605473	78561980
chr14	78561980	81000021
chr14	81000021	83137833
chr14	83137833	84092007
chr14	84092007	85568114
chr14	85568114	87635079
chr14	87635079	89411185
chr14	89411185	91618007
chr14	91618007	92916399
chr14	92916399	94325285
chr14	94325285	95947052
chr14	95947052	97572724
chr14	97572724	99370326
chr14	99370326	101357468
chr14	101357468	103390025
chr14	103390025	105001894
chr14	105001894	106339117
chr14	106339117	107289454
chr15	20001200	24979404
chr15	24979404	27298112
chr15	27298112	28604617
chr15	28604617	30435204
chr15	30435204	32197742
chr15	32197742	34016007
chr15	34016007	35038011
chr15	35038011	37456726
chr15	37456726	38531452
chr15	38531452	40384324
chr15	40384324	41798467
chr15	41798467	42910414
chr15	42910414	45095316
chr15	45095316	46666511
chr15	46666511	48365228
chr15	48365228	50008043
chr15	50008043	51678516
chr15	51678516	53699684
chr15	53699684	55823743
chr15	55823743	56865255
chr15	56865255	58828306
chr15	58828306	59909705
chr15	59909705	61292486
chr15	61292486	63015122
chr15	63015122	64339748
chr15	64339748	67468817
chr15	67468817	68891518
chr15	68891518	72047167
chr15	72047167	73628714
chr15	73628714	76398691
chr15	76398691	78516009
chr15	78516009	80638744
chr15	80638744	84260703
chr15	84260703	86652259
chr15	86652259	88370262
chr15	88370262	90070118
chr15	90070118	92011845
chr15	92011845	93591318
chr15	93591318	94922391
chr15	94922391	96473837
chr15	96473837	98030720
chr15	98030720	100290016
chr15	100290016	102520966
chr16	60054	1107356
chr16	1107356	2410640
chr16	2410640	4046570
chr16	4046570	5117847
chr16	5117847	5855102
chr16	5855102	6893427
chr16	6893427	7604976
chr16	7604976	8961640
chr16	8961640	10868121
chr16	10868121	12612116
chr16	12612116	13154643
chr16	13154643	14470775
chr16	14470775	16960200
chr16	16960200	18102736
chr16	18102736	20151006
chr16	20151006	21499397
chr16	21499397	24309956
chr16	24309956	25725416
chr16	25725416	27795175
chr16	27795175	29698606
chr16	29698606	32703171
chr16	32703171	49008733
chr16	49008733	51214363
chr16	51214363	54450244
chr16	54450244	56907578
chr16	56907578	58867358
chr16	58867358	60746327
chr16	60746327	62227636
chr16	62227636	63691589
chr16	63691589	66398031
chr16	66398031	69541877
chr16	69541877	73543801
chr16	73543801	74971511
chr16	74971511	76275794
chr16	76275794	77523907
chr16	77523907	78865571
chr16	78865571	80297074
chr16	80297074	81432839
chr16	81432839	82747943
chr16	82747943	83612985
chr16	83612985	84445738
chr16	84445738	85374253
chr16	85374253	86981136
chr16	86981136	88704477
chr16	88704477	90292812
chr17	56	1173001
chr17	1173001	2632816
chr17	2632816	3591295
chr17	3591295	5574965
chr17	5574965	6634094
chr17	6634094	9312566
chr17	9312566	10575138
chr17	10575138	12534588
chr17	12534588	13464480
chr17	13464480	14215665
chr17	14215665	15280576
chr17	15280576	16437685
chr17	16437685	18853178
chr17	18853178	21285188
chr17	21285188	26802478
chr17	26802478	29266626
chr17	29266626	31695393
chr17	31695393	32911704
chr17	32911704	34395061
chr17	34395061	36495389
chr17	36495389	38649589
chr17	38649589	39900528
chr17	39900528	43932381
chr17	43932381	45880185
chr17	45880185	49895548
chr17	49895548	51665573
chr17	51665573	53597456
chr17	53597456	55680273
chr17	55680273	57488351
chr17	57488351	59650641
chr17	59650641	63102444
chr17	63102444	64800166
chr17	64800166	67858770
chr17	67858770	69546299
chr17	69546299	72789312
chr17	72789312	75392712
chr17	75392712	77326228
chr17	77326228	79044911
chr17	79044911	81194908
chr18	10644	2405380
chr18	2405380	3542107
chr18	3542107	5154578
chr18	5154578	7133194
chr18	7133194	8467004
chr18	8467004	10845313
chr18	10845313	12024368
chr18	12024368	14439639
chr18	14439639	19485844
chr18	19485844	20790476
chr18	20790476	22895523
chr18	22895523	24025116
chr18	24025116	25760877
chr18	25760877	27429487
chr18	27429487	29368667
chr18	29368667	31424983
chr18	31424983	33794596
chr18	33794596	35838351
chr18	35838351	36979961
chr18	36979961	38767938
chr18	38767938	40990734
chr18	40990734	42921886
chr18	42921886	44155069
chr18	44155069	46208355
chr18	46208355	47730999
chr18	47730999	51061437
chr18	51061437	52517132
chr18	52517132	54958664
chr18	54958664	57377707
chr18	57377707	58232803
chr18	58232803	60278229
chr18	60278229	61818997
chr18	61818997	62898666
chr18	62898666	65106561
chr18	65106561	66205923
chr18	66205923	68813477
chr18	68813477	70096916
chr18	70096916	72982759
chr18	72982759	74459354
chr18	74459354	75975853
chr18	75975853	77149289
chr18	77149289	78017158
chr19	80840	759261
chr19	759261	1347381
chr19	1347381	3179690
chr19	3179690	5377037
chr19	5377037	6893560
chr19	6893560	9016693
chr19	9016693	9383877
chr19	9383877	11849449
chr19	11849449	12500149
chr19	12500149	15648148
chr19	15648148	16749208
chr19	16749208	20221313
chr19	20221313	21822864
chr19	21822864	23466054
chr19	23466054	27741111
chr19	27741111	29789974
chr19	29789974	30600792
chr19	30600792	32440024
chr19	32440024	34205226
chr19	34205226	36468278
chr19	36468278	38726451
chr19	38726451	41446535
chr19	41446535	41948683
chr19	41948683	43862455
chr19	43862455	45579043
chr19	45579043	47334409
chr19	47334409	49093112
chr19	49093112	51334271
chr19	51334271	52985347
chr19	52985347	54734184
chr19	54734184	55660892
chr19	55660892	57195058
chr19	57195058	59118839
chr20	60479	2244039
chr20	2244039	3147024
chr20	3147024	5415568
chr20	5415568	6669967
chr20	6669967	8602105
chr20	8602105	9591197
chr20	9591197	11014704
chr20	11014704	12154278
chr20	12154278	13689325
chr20	13689325	15543676
chr20	15543676	17753799
chr20	17753799	19110601
chr20	19110601	21683223
chr20	21683223	22740664
chr20	22740664	24060965
chr20	24060965	31047798
chr20	31047798	34960772
chr20	34960772	36954724
chr20	36954724	39083843
chr20	39083843	41198420
chr20	41198420	43060137
chr20	43060137	44814232
chr20	44814232	47198830
chr20	47198830	49239658
chr20	49239658	52472372
chr20	52472372	54142341
chr20	54142341	56512594
chr20	56512594	58104565
chr20	58104565	60242140
chr20	60242140	60765010
chr20	60765010	62189093
chr20	62189093	62965163
chr21	9411243	15842927
chr21	15842927	17889943
chr21	17889943	19332406
chr21	19332406	21056780
chr21	21056780	22883608
chr21	22883608	25333578
chr21	25333578	26470748
chr21	26470748	29125075
chr21	29125075	30846395
chr21	30846395	32814465
chr21	32814465	35407943
chr21	35407943	36355773
chr21	36355773	38040881
chr21	38040881	39830620
chr21	39830620	41389310
chr21	41389310	43321528
chr21	43321528	44504005
chr21	44504005	46176127
chr21	46176127	47031781
chr21	47031781	48119752
chr22	16050408	17581547
chr22	17581547	18557031
chr22	18557031	19912242
chr22	19912242	21986827
chr22	21986827	23398337
chr22	23398337	25209349
chr22	25209349	26524344
chr22	26524344	28233390
chr22	28233390	30954397
chr22	30954397	32665507
chr22	32665507	34860926
chr22	34860926	36453608
chr22	36453608	37977990
chr22	37977990	40527060
chr22	40527060	42690818
chr22	42690818	44994946
chr22	44994946	46915049
chr22	46915049	48212129
chr22	48212129	49800746
chr22	49800746	51243298

## Sheet: ST3a
Supplementary Table 3a: Effective number of variants within LD Blocks in EUR population with MAF greater than or equal to 0.05.
CHR	Start Position	End Position	Number of Raw Variants	Unique Variants	Effective Number of Tests
1	241582220	242071602	1453	890	342
1	200137649	201589975	4242	2444	890
1	173097907	175089768	3704	1435	441
1	204681068	206073265	3210	1923	720
1	239925314	240564091	2287	1398	489
1	234599434	235819436	3139	1939	769
1	238567807	239925314	3749	2074	743
1	181144121	182755356	3741	2036	722
1	69687616	71372470	4066	1975	650
1	237555628	238567807	2946	1742	573
1	240564091	241582220	3038	2085	846
1	233429284	234599434	3607	2207	819
1	235819436	237555628	5277	3286	1149
1	20469149	21736588	3114	1819	647
1	247344518	249239466	5598	3056	1086
1	65041704	66939404	4371	2087	708
1	188759945	189904130	2221	787	218
1	48978188	49894177	1176	703	240
1	3582736	4380811	2465	1571	633
1	5913893	7247335	3176	2095	734
1	191868930	194107442	4684	2245	675
1	37549183	38731847	2785	1589	593
1	43758457	44969183	2201	1286	431
1	41975327	43758457	3748	1838	593
1	38731847	40200567	3224	2038	784
1	44969183	46899501	3866	1698	568
1	51713726	54226262	3854	2086	784
1	154770403	156336133	2114	1227	466
1	114873845	115880593	2040	1055	370
1	113273306	114873845	3524	1994	711
1	103914211	106087842	5800	2382	675
1	83991748	84844495	1774	915	302
1	1892607	3582736	4657	3298	1291
1	115880593	118839067	5833	3079	1131
1	159913048	162346721	5895	3580	1310
1	10583	1892607	2925	2108	832
1	203334734	204681068	3287	2089	776
1	166460517	169086324	6996	3979	1476
1	79661198	81354191	4449	2188	619
1	81354191	83991748	7432	3989	1305
1	221858231	222230220	923	565	189
1	216243634	218705513	6480	3516	1206
1	194107442	196176201	6059	2254	672
1	153180829	154770403	3246	1792	662
1	111741737	113273306	4113	2276	820
1	151538881	153180829	3630	1660	504
1	86454751	88128631	4146	1967	686
1	84844495	86454751	4183	2247	829
1	162346721	165191702	7345	3829	1392
1	218705513	219590571	2480	1141	367
1	175089768	177433381	5165	2548	852
1	244109499	245506746	3946	2672	1040
1	214578266	216243634	3823	2017	666
1	32438685	34799758	3949	2323	851
1	212842330	214578266	3638	2256	832
1	4380811	5913893	5469	3432	1289
1	148361253	151538881	3991	2283	992
1	186810023	188759945	6722	2676	816
1	242071602	244109499	5461	3325	1093
1	178944309	178954470	22	18	8
1	110303931	111741737	3500	2096	759
1	165191702	166460517	3323	1855	669
1	48002576	48978188	1741	1100	374
1	106087842	108409665	5269	2598	891
1	169086324	170557776	4644	1785	513
1	56413117	57021728	1538	862	263
1	40200567	41975327	4428	2349	906
1	108409665	110303931	4298	2147	841
1	144977494	148361253	3979	2382	1064
1	49894177	51713726	2029	856	289
1	7247335	9365199	5173	3531	1262
1	102041016	102898745	2272	932	314
1	245506746	247344518	6594	4022	1387
1	177433381	178944309	3064	1695	535
1	66939404	68477895	4288	2093	711
1	158027412	159913048	5314	2459	859
1	219590571	221858231	5352	2571	848
1	102898745	103914211	2561	837	276
1	88128631	90066303	3578	1889	674
1	201589975	203334734	3737	2416	933
1	54226262	56413117	5590	3311	1211
1	208410364	210787750	5518	3443	1202
1	206073265	208410364	4002	2361	884
1	46899501	48002576	2493	1344	415
1	170557776	173097907	6443	3053	964
1	68477895	69687616	2620	1317	494
1	156336133	158027412	3917	2052	767
1	59890409	61922365	3685	2167	847
1	61922365	63455089	3718	2225	801
1	230685255	232090252	3699	2171	814
1	229156248	230685255	3643	2214	849
1	232090252	233429284	3636	2171	813
1	222230220	224938520	5929	3446	1099
1	226810860	229156248	6144	2917	885
1	10806984	11777841	2067	1407	541
1	11777841	12779466	2170	1494	566
1	58865399	59890409	2671	1321	454
1	94506191	96150893	3930	2204	777
1	91886317	93536459	3762	1890	604
1	21736588	23086883	4088	2601	983
1	99800604	100826405	2083	958	333
1	97885249	99800604	4075	1890	644
1	25516845	27401867	3203	1810	622
1	90066303	91886317	3919	2121	762
1	210787750	212842330	5074	2775	1011
1	96150893	97885249	4029	1813	570
1	23920590	25516845	3648	2303	838
1	27401867	30161881	4559	2597	946
1	63455089	65041704	4425	2178	794
1	224938520	226810860	4068	2229	784
1	57021728	58865399	4707	2703	944
1	18662899	20469149	5260	3056	1209
1	74326907	76728135	5589	2324	697
1	30161881	32438685	6041	3380	1165
1	100826405	102041016	3030	1481	504
1	71372470	71684405	744	322	95
1	23086883	23920590	1604	936	332
1	71684405	74326907	4955	1976	627
1	12779466	14891511	4528	3032	1203
1	196176201	197311514	2226	942	254
1	197311514	199239884	3586	1935	591
1	118839067	144977494	6596	4175	2015
1	9365199	10806984	2492	1640	658
1	34799758	37549183	4249	2616	1022
1	14891511	16897730	6268	3606	1355
1	16897730	18662899	4896	3341	1466
1	76728135	79661198	6830	3341	1180
1	178954470	181144121	6246	2791	886
1	199239884	200137649	2731	1248	400
1	184595513	186810023	3781	1960	603
1	182755356	184595513	4139	2001	658
1	189904130	191868930	5031	2088	587
1	93536459	94506191	2086	772	253
2	135158578	137042794	2992	1400	430
2	3973779	5708337	4708	2844	1014
2	29217559	30463711	3239	2239	725
2	133042784	135158578	5285	3445	1146
2	28598777	29217559	1611	1040	365
2	184357608	185280173	2855	1187	309
2	6836254	8422147	3696	2150	806
2	78079264	80050403	5874	3312	995
2	81620841	85140680	8875	2837	828
2	24686918	26894985	4203	2527	860
2	75630086	76913661	3714	2212	652
2	80050403	81620841	3561	2243	699
2	10133	1781022	6655	3780	1242
2	70755198	73174848	5615	3371	1140
2	130658085	133042784	5239	2799	902
2	35345028	36122006	3298	1765	385
2	130067170	130658085	1375	629	216
2	38132712	39031337	2386	1825	498
2	31550450	33363777	3536	2626	734
2	36122006	38132712	6049	4345	1330
2	26894985	28598777	2577	1514	457
2	30463711	31550450	3293	2176	685
2	33363777	35345028	6707	4551	1329
2	73174848	75630086	4928	3109	910
2	5708337	6836254	3569	1913	686
2	68010176	69139564	3134	1702	578
2	167160270	167355970	576	305	94
2	161769733	163503551	2477	1068	379
2	155391135	157560635	4560	2340	734
2	165178840	167160270	4384	2299	718
2	181312739	182266031	2566	1209	347
2	169968236	171226245	3985	2088	685
2	159577082	161769733	5786	2901	891
2	173138905	175588929	5933	3694	1362
2	171226245	173138905	4679	2883	934
2	157560635	158533218	1084	730	264
2	47318772	48213001	2490	1786	653
2	46482634	47318772	2449	1843	593
2	44313803	46482634	6161	4907	1670
2	1781022	3973779	6717	4301	1657
2	8422147	10298469	5020	3184	1141
2	12419150	14335308	5298	2616	900
2	40281483	43309590	9189	6578	1749
2	167355970	169968236	6207	3490	1093
2	48213001	50022257	5289	3669	990
2	50022257	50818928	2472	1597	374
2	43309590	44313803	2972	2114	594
2	158533218	159577082	2708	1432	455
2	175588929	177363636	3793	2035	668
2	233550003	235150987	4356	2703	953
2	185280173	189882065	9164	3913	1077
2	199311125	201576284	3560	2109	686
2	209941529	212379518	6115	3147	891
2	39031337	40281483	2207	1565	431
2	217715661	218395480	1688	1087	358
2	23341383	24686918	3258	1746	590
2	237449032	238760981	3936	2334	746
2	16329735	18647423	5649	2977	1061
2	178553183	181312739	7109	3865	1227
2	21050490	23341383	3947	2472	779
2	57429100	58297315	2785	1496	336
2	146445570	147277162	1227	675	218
2	151731462	152486782	1973	964	287
2	177363636	178553183	2810	1534	498
2	239952643	241560084	5557	3513	1340
2	218395480	220454551	3405	1999	740
2	60292000	62429044	4204	2912	863
2	201576284	202818637	2084	1235	467
2	19692404	21050490	3850	2348	846
2	205799241	206735704	2057	1607	566
2	67226166	68010176	2577	1616	475
2	195861164	196447456	1195	650	219
2	231843389	233550003	4004	2606	912
2	18647423	19692404	2365	1344	456
2	56203345	57429100	3168	2294	541
2	150210292	151731462	3227	1657	581
2	196447456	198078110	3095	1543	498
2	127373764	128034347	2254	1116	387
2	128034347	129474441	3546	1828	632
2	224859419	225840004	2555	1227	370
2	238760981	239952643	3780	2309	828
2	235150987	236043550	3073	2026	819
2	214014282	215573795	3626	1968	521
2	64625913	65933444	3213	1968	733
2	189882065	191973357	3829	1839	593
2	229370787	231843389	6727	3600	1291
2	147277162	150210292	4919	2389	788
2	242149921	243188920	2908	1841	594
2	206735704	208645399	4593	2736	951
2	202818637	205799241	5134	3114	1085
2	163503551	164466638	1731	819	283
2	198078110	199311125	2087	948	281
2	95326452	98995201	4106	2192	668
2	137042794	138698117	4485	2292	678
2	62429044	64625913	4076	2769	786
2	212379518	214014282	4867	3030	923
2	65933444	67226166	2976	1884	650
2	101822329	102688765	2121	1077	354
2	106210058	107408267	3520	1893	721
2	125840921	127373764	4396	1380	405
2	98995201	101822329	5992	3027	924
2	241560084	242149921	1910	1192	444
2	141805351	142518602	2463	1434	409
2	142518602	144519484	4704	2432	773
2	116772470	118367466	3858	1724	444
2	123302906	124732250	4216	1661	490
2	52491133	53508452	3517	2350	531
2	164466638	165178840	1194	661	207
2	138698117	140100271	3257	1277	469
2	118367466	121303783	6802	3497	1237
2	124732250	125840921	2986	1436	483
2	225840004	228119842	5490	2566	885
2	105125034	106210058	2723	1536	525
2	85140680	88038507	5721	3452	1222
2	50818928	52491133	4413	3138	800
2	228119842	229370787	4375	2112	757
2	144519484	146445570	2501	1475	567
2	113921856	116772470	6324	3694	1163
2	154005056	155391135	3974	2301	655
2	215573795	217715661	5122	3348	1174
2	107408267	108429177	2649	1066	359
2	110572432	113921856	5690	3215	1167
2	54685226	56203345	4222	2851	763
2	53508452	54685226	3229	2144	592
2	76913661	78079264	3861	2389	686
2	182266031	184357608	4676	2526	772
2	14335308	16329735	5258	2937	977
2	208645399	209941529	2879	1558	490
2	140100271	141805351	4921	2335	725
2	10298469	12419150	7100	4530	1784
2	129474441	130067170	1724	725	262
2	103588215	105125034	2338	1116	400
2	152486782	154005056	3493	1898	576
2	220454551	222521176	5568	3273	1070
2	121303783	123302906	4123	2290	813
2	191973357	195861164	5959	3087	1058
2	88038507	89154526	1890	1039	408
2	102688765	103588215	2448	1038	331
2	108429177	110572432	4424	2310	744
2	89154526	95326452	2214	1721	700
2	69139564	70755198	3380	1799	557
2	236043550	237449032	3557	2146	710
2	58297315	60292000	4044	3049	897
2	222521176	224859419	5708	2781	1039
3	8648561	9543183	2591	1903	750
3	6083183	7083387	3417	2280	754
3	13070799	14816900	4931	3189	1168
3	9543183	11019665	3716	2548	957
3	11019665	13070799	5137	3236	1151
3	49316972	51832015	3152	1354	453
3	41064528	42540002	4042	2033	589
3	42540002	45165153	4448	2299	810
3	47727212	49316972	1598	767	274
3	55348860	56433907	2397	1469	458
3	51832015	54081390	3824	2227	700
3	54081390	55348860	3481	2618	856
3	56433907	58157519	4215	2284	694
3	135456906	137371083	3703	1769	481
3	137371083	139954597	5315	2663	875
3	133252173	135456906	5103	3072	1029
3	46657500	47727212	1379	704	243
3	45165153	46657500	4211	2090	658
3	7083387	8648561	5465	3466	1019
3	150252004	151348730	2433	1553	513
3	154714218	156008700	2756	1378	465
3	157312028	159477890	5225	2050	612
3	156008700	157312028	2903	1311	425
3	17891118	19125144	2730	1345	456
3	20091348	21643707	5249	3229	976
3	19125144	20091348	1671	950	316
3	151348730	153256571	5015	2555	843
3	21643707	22204244	2915	1811	568
3	106982811	109522395	6036	2948	966
3	16282442	17891118	3534	1952	630
3	113947863	115447080	2351	1442	556
3	116800153	118530251	4184	2528	754
3	112815699	113947863	2408	1291	463
3	25461558	26877769	3345	1825	579
3	22204244	23804865	4661	2945	801
3	23804865	25461558	4833	3409	1030
3	197075987	197946622	2206	1370	543
3	126214943	128194861	4208	2215	736
3	115447080	116800153	3538	2029	635
3	153256571	154714218	3707	1400	443
3	173477285	175116539	4675	3014	874
3	167117429	168580960	2837	1322	429
3	179374586	181511166	3758	2126	706
3	163253205	165055469	5001	1623	437
3	181511166	183769683	4939	2699	978
3	165055469	167117429	5288	1961	567
3	194786674	195971408	4039	2980	1134
3	109522395	110513770	2564	964	271
3	168580960	170964909	5255	2892	978
3	170964909	172295731	3486	2186	814
3	195971408	197075987	3183	2002	745
3	161524504	163253205	6846	2082	587
3	178107165	179374586	3196	1661	531
3	36486842	38356116	3394	1921	666
3	38356116	40221298	4610	2202	739
3	2992120	4431647	5082	3553	1213
3	121974097	123517768	3491	1807	661
3	159477890	161524504	4144	1753	545
3	120523055	121974097	3579	1279	396
3	144410816	145664619	3903	1548	461
3	60157	1441779	4516	3330	1165
3	145664619	146726629	3030	1327	418
3	118530251	120523055	4806	2317	792
3	123517768	124936642	3748	2176	745
3	32351715	33255592	2480	1569	573
3	4431647	6083183	5503	4291	1514
3	186890344	188856214	4648	2942	1163
3	33255592	35283458	4671	2673	782
3	124936642	126214943	4553	2226	658
3	139954597	141339097	2857	1641	535
3	175116539	176320287	3201	1536	487
3	1441779	2992120	6987	4980	1656
3	29142260	30717955	4742	3085	1088
3	30717955	32351715	4215	2625	905
3	27840910	29142260	3004	1961	591
3	130244735	131836516	3930	1899	555
3	82643886	84367479	3634	1590	438
3	40221298	41064528	1008	588	208
3	98215950	99373762	3177	1347	420
3	87409732	88298373	2332	889	259
3	70449028	72529329	4594	3538	1279
3	77508835	79024541	2998	1570	490
3	95311971	98215950	6371	2630	705
3	63669286	65273538	4285	3217	1020
3	72529329	74321817	4598	3124	1027
3	103084960	104581613	4777	1888	580
3	99373762	100592217	2066	1044	317
3	62355666	63669286	3957	2477	864
3	141339097	143164628	4531	2414	874
3	85582231	87409732	4546	1708	471
3	176320287	178107165	4439	2441	868
3	58157519	60272906	6003	3707	1239
3	183769683	185068255	3152	2014	810
3	26877769	27840910	2622	1424	393
3	94255316	95311971	2931	1076	257
3	79024541	81427310	5170	1935	562
3	66270447	68286914	5115	3311	993
3	143164628	144410816	2753	1327	451
3	60272906	62355666	6108	4179	1412
3	68286914	69276762	2415	1653	451
3	100592217	103084960	6245	2618	775
3	188856214	190226607	4624	2763	946
3	14816900	16282442	3585	2026	712
3	75704949	77508835	4434	2648	788
3	172295731	173477285	2617	1736	576
3	146726629	149043237	5416	2815	1036
3	190226607	192343814	6472	3399	1133
3	185068255	186890344	4449	2986	1192
3	84367479	85582231	3149	1181	313
3	88298373	94255316	5380	2391	660
3	149043237	150252004	2955	1743	668
3	104581613	106982811	6231	3012	1021
3	74321817	75704949	3802	2136	568
3	69276762	70449028	3039	1878	569
3	128194861	130244735	4440	2259	741
3	131836516	133252173	4029	1783	562
3	110513770	112815699	5322	2519	857
3	35283458	36486842	2853	1633	478
3	65273538	66270447	2603	1960	685
3	194059671	194786674	3096	1972	781
3	81427310	82643886	2465	1074	321
3	192343814	194059671	4774	2876	1047
4	118479918	119933512	4154	1703	508
4	115666246	117276929	4136	1407	388
4	107501305	108815348	2651	1240	454
4	111256567	113870102	5619	2974	944
4	113870102	115666246	4672	2431	785
4	108815348	111256567	5977	2993	1054
4	150683580	152782184	3805	1752	570
4	148521873	150683580	4067	2123	702
4	146178187	148521873	4786	2430	852
4	99424067	100678360	3309	1443	514
4	96182188	97540703	3947	1935	615
4	161826435	163243679	5421	2227	698
4	105305294	107501305	4601	2137	681
4	103221356	105305294	4341	2000	540
4	97540703	99424067	4561	1616	447
4	8152235	9326479	3641	2458	905
4	58935008	60741087	5837	2306	662
4	122657987	124286481	3388	1484	452
4	66600492	68059497	3819	1655	516
4	119933512	120392684	1842	774	212
4	100678360	103221356	6444	3176	953
4	120392684	122657987	6643	2868	942
4	9326479	10699152	4967	2761	664
4	60741087	62371763	4789	1876	623
4	10699152	12323034	5296	3156	896
4	15147446	15927009	1846	1002	319
4	82125315	83372593	2995	1634	513
4	79093979	80990297	4489	1879	589
4	152782184	154477641	3481	2186	796
4	167018858	167852917	2438	1022	298
4	2842979	3846040	2821	2202	790
4	38907022	40202609	3793	1990	705
4	170776510	172558635	4353	1926	555
4	169676825	170776510	2355	1272	440
4	15927009	17383322	4019	2599	870
4	4684116	5502388	2744	1883	654
4	7539692	8152235	2511	1934	746
4	62371763	64341001	5308	2303	697
4	184929455	186909090	6850	4711	1745
4	189693511	191043594	5394	3205	1205
4	157485097	158743718	3050	1434	442
4	165823448	167018858	3478	1850	610
4	71049152	72140558	2690	1025	364
4	80990297	82125315	2010	926	296
4	68854765	71049152	7771	2888	827
4	188472981	189693511	5392	3365	1275
4	64341001	66600492	6249	2562	760
4	74592390	77130707	6472	2623	841
4	128996665	130591885	3465	1859	632
4	161058864	161826435	2675	1494	433
4	84799656	86930609	4810	2026	656
4	87534648	89238028	4630	2326	785
4	183371275	184929455	5274	3524	1419
4	124286481	125210862	2398	1105	394
4	3846040	4684116	3912	2614	879
4	10240	694715	1350	812	280
4	163243679	164478234	3039	1485	495
4	127275477	127830293	1667	958	261
4	125210862	126480886	3403	1659	571
4	127830293	128996665	1479	876	225
4	126480886	127275477	2502	1242	378
4	158743718	161058864	5036	2402	682
4	167852917	169676825	4794	2586	819
4	155056126	157485097	6640	3437	1111
4	17383322	18841874	3467	1754	567
4	182066807	183371275	4566	3352	1246
4	1478711	2842979	3307	2238	766
4	178991910	180122043	3197	1709	533
4	90231564	91560677	2768	1200	394
4	180122043	182066807	6891	4269	1498
4	174264132	176570716	5634	3121	1144
4	164478234	165823448	4300	2393	740
4	694715	1478711	2336	1437	473
4	130591885	131283821	1640	810	237
4	141084631	143443265	5553	2616	880
4	143443265	146178187	5422	2245	617
4	29762208	30454535	1620	782	280
4	35151415	36020436	3266	1164	362
4	131283821	132954033	4669	2211	656
4	132954033	134628434	4819	1668	493
4	136566407	138541971	5884	2532	847
4	40202609	42213058	5500	3406	1287
4	176570716	178991910	6981	3816	1312
4	94233299	96182188	4707	2669	766
4	138541971	139556511	2777	1500	473
4	77130707	79093979	5385	2516	837
4	42213058	43965045	4839	2191	701
4	172558635	174264132	3154	1578	499
4	154477641	155056126	1693	931	316
4	30454535	31782981	3745	1886	589
4	45189157	47411896	4167	1847	613
4	43965045	45189157	3696	1328	415
4	48123600	53877433	5172	2951	1227
4	86930609	87534648	1036	457	160
4	27965868	29762208	5660	2524	720
4	25609322	27343722	3664	2483	925
4	12323034	14272001	5533	3080	959
4	31782981	33172766	4502	1814	529
4	22319347	24135529	4383	2494	806
4	37255047	38907022	5334	3241	1175
4	83372593	84799656	3831	1914	653
4	134628434	136566407	4983	2054	588
4	27343722	27965868	1748	938	306
4	55429556	56547644	3090	1522	533
4	56547644	58935008	7360	4031	1403
4	53877433	55429556	3760	1980	631
4	117276929	118479918	3459	1460	428
4	72140558	74592390	4700	1880	595
4	14272001	15147446	2600	1621	525
4	186909090	188472981	5126	3444	1286
4	18841874	20544557	5061	2019	624
4	5502388	6773043	4556	3563	1383
4	91560677	94233299	5434	2754	825
4	24135529	25609322	3815	2373	897
4	20544557	22319347	5035	2662	838
4	68059497	68854765	2181	867	312
4	33172766	35151415	4149	1335	403
4	36020436	37255047	4045	1676	505
4	139556511	141084631	3485	2184	828
4	47411896	48123600	1801	811	278
4	89238028	90231564	2505	1325	468
4	6773043	7539692	3067	2381	915
5	65911286	67850860	4712	2856	941
5	142981248	144943354	4421	2065	573
5	125785649	127344604	3197	1795	601
5	134777401	136376050	3643	1752	540
5	136376050	139265072	4284	2350	812
5	129519025	132139649	3981	1864	519
5	127344604	129519025	5644	2282	660
5	132139649	134777401	5214	3302	1239
5	140645971	142981248	5039	3282	1254
5	139265072	140645971	2324	1137	376
5	147181998	148662624	3499	1714	565
5	22152073	23494324	3258	1468	446
5	63968304	65911286	4400	1954	662
5	63218987	63968304	1313	654	189
5	38802410	40287729	3829	1763	545
5	53703044	55417349	4555	2250	743
5	50163398	52134622	4703	2207	646
5	52134622	53703044	4730	2262	755
5	43983499	50163398	6518	2470	634
5	67850860	71240456	3831	2091	714
5	159973944	161482133	3629	1612	548
5	144943354	147181998	4914	2456	847
5	56621102	57340073	1759	834	328
5	55417349	56621102	3073	1770	709
5	122556905	123798100	3144	1940	562
5	120452166	122556905	5535	3121	910
5	77623332	79393144	4318	2536	875
5	118608820	119669042	2788	1653	462
5	61672995	63218987	3995	1785	519
5	91840542	93809984	2290	1191	450
5	79393144	80481471	3429	2002	677
5	40287729	41888710	4407	1639	514
5	123798100	125785649	6043	3782	1181
5	119669042	120452166	2146	1161	302
5	60935907	61672995	1428	728	243
5	107264196	108633934	3810	2016	513
5	158825698	159973944	2882	1749	674
5	8446336	9718832	3956	2065	713
5	41888710	43983499	3951	1682	472
5	101578769	103320005	3707	1870	554
5	87389991	88891530	1821	880	316
5	88891530	90422654	2605	1444	468
5	90422654	91840542	2441	1164	391
5	165642395	166847740	2767	2005	660
5	163771582	165642395	4341	2943	920
5	104851483	105893055	1983	1221	324
5	153773088	155373505	3955	2102	735
5	156628700	158825698	5735	2813	936
5	162743908	163771582	2864	1674	534
5	7143218	8446336	4217	2254	733
5	80481471	82025648	3070	2030	659
5	97315601	99260992	5350	2283	617
5	5973233	7143218	3638	2017	752
5	105893055	107264196	3743	2527	760
5	2132442	3361941	5051	3207	1255
5	29714820	31390249	4720	2236	747
5	117346213	118608820	3096	1968	601
5	27984513	29714820	5107	2074	650
5	175450595	177251507	3039	1944	764
5	172678327	173642871	2906	1731	666
5	3361941	4632110	3755	2038	756
5	57340073	58524622	3901	1978	631
5	11173271	13464832	4817	2871	775
5	35048970	36433954	3083	1557	523
5	36433954	38802410	5029	2828	988
5	115831047	117346213	4370	2701	880
5	71240456	73759326	5930	3093	1063
5	982252	2132442	4415	3210	1254
5	75798866	77623332	4536	2756	951
5	177251507	178413464	4353	2830	1050
5	33500180	35048970	4054	2202	788
5	4632110	5973233	4084	2371	913
5	13464832	14757804	3273	1925	659
5	155373505	156628700	2574	1517	458
5	26184851	26857604	1903	807	270
5	95963519	97315601	4189	1479	475
5	93809984	95963519	4198	2553	892
5	23494324	26184851	7593	3212	996
5	26857604	27984513	2768	1284	412
5	99260992	101578769	5279	2347	615
5	11940	982252	3297	2120	732
5	180559933	180885156	469	326	120
5	148662624	150561298	4519	2753	1026
5	152867774	153773088	2653	1177	390
5	171074292	172678327	4086	2615	1033
5	82025648	83972689	3756	2287	824
5	14757804	16963613	4506	2915	1002
5	179401244	180559933	3885	2444	931
5	18051592	19917716	5624	2559	718
5	168525318	169505664	2468	1507	568
5	108633934	110821144	4958	2748	800
5	161482133	162743908	3048	1623	501
5	111981562	113396285	4035	2378	634
5	150561298	152867774	6282	2832	884
5	85767290	87389991	2255	1291	391
5	19917716	22152073	4800	2184	693
5	169505664	171074292	3877	2360	946
5	58524622	60935907	4567	2437	727
5	16963613	18051592	2424	1453	569
5	113396285	114830370	4204	2378	624
5	9718832	11173271	4213	2735	965
5	73759326	75798866	5080	2714	851
5	114830370	115831047	3147	1780	483
5	173642871	175450595	4948	3475	1428
5	31390249	33500180	5709	3445	1364
5	178413464	179401244	2845	2007	802
5	103320005	104851483	3759	2056	536
5	110821144	111981562	3017	1836	532
5	166847740	168525318	3924	2952	1097
5	83972689	85767290	6360	2550	704
6	170330173	171051270	2143	1413	529
6	167024733	168042835	3501	2185	745
6	168042835	169382050	5503	3266	1203
6	55468270	56105313	2109	720	212
6	47311898	48391125	2939	1164	359
6	156763326	158218719	3040	1981	764
6	106056733	107450306	4104	2399	927
6	162169564	162931203	2533	1668	520
6	162931203	164383521	4646	2592	841
6	164383521	165586864	4278	2164	715
6	53279102	55468270	6524	2908	912
6	158218719	160580497	7493	3682	1266
6	103983395	106056733	5405	2650	836
6	42038721	43756169	3334	2029	810
6	68849483	69523448	2412	909	300
6	80691170	81929222	4422	1444	349
6	67329215	68849483	5803	2085	622
6	110304247	112345014	4387	2170	743
6	114220833	116131396	4837	1920	589
6	102636772	103983395	3847	1523	397
6	39295677	40345115	2268	1241	412
6	112345014	114220833	4075	1923	686
6	100630146	102636772	4080	2006	627
6	43756169	45406563	4049	2505	879
6	169382050	170330173	2895	1557	521
6	52210476	53279102	3008	1605	590
6	71609510	73450097	4959	2199	702
6	56105313	57599465	3413	1763	721
6	57599465	61880512	3379	1162	275
6	94441175	97093511	6079	2487	823
6	40345115	42038721	4231	2635	993
6	48391125	50386145	5114	1757	503
6	25684587	26791233	3075	1365	403
6	23936619	24852275	2776	1722	595
6	88822140	89973052	2915	1522	535
6	63552888	65765742	5116	1945	541
6	83127149	85209989	3799	1730	552
6	29737971	30798168	8530	3338	669
6	97093511	97842284	1736	724	242
6	21684065	22748307	3447	2161	755
6	31571218	32682664	16660	11896	2286
6	32682664	33236497	5214	2280	566
6	33236497	35455756	5384	3066	1046
6	22748307	23936619	3840	2417	773
6	85209989	87069500	5396	1902	583
6	28017819	28917608	2297	846	239
6	97842284	100630146	6060	2876	980
6	87069500	88822140	4602	1979	612
6	160580497	162169564	4969	2840	937
6	94118142	94441175	650	248	77
6	30798168	31571218	10506	5047	1078
6	26791233	28017819	2716	1215	330
6	93428644	94118142	2238	952	352
6	91843196	93428644	3780	1873	630
6	7808936	9020026	3936	2023	652
6	24852275	25684587	2818	1600	538
6	154974120	156763326	4662	3185	1161
6	17386405	19207487	5260	2617	832
6	28917608	29737971	2844	1176	304
6	153094496	154974120	6023	2888	1016
6	69523448	71609510	5565	2447	750
6	13209388	14802924	3972	2436	797
6	9020026	10540317	4449	2490	923
6	11790816	13209388	3514	2064	712
6	150253404	151912703	5539	3541	1311
6	148920352	150253404	3552	1942	653
6	107450306	108464380	2118	1255	452
6	137614218	138822629	3112	1702	663
6	89973052	91843196	4314	2599	963
6	139845436	142288479	4607	2102	630
6	145319810	146665424	2559	951	270
6	138822629	139845436	2755	1696	632
6	146665424	148920352	5456	3555	1220
6	5791472	6785207	3442	2214	816
6	10540317	11790816	3231	1952	686
6	61880512	63552888	4814	1505	318
6	108464380	110304247	3675	1669	562
6	119963278	120512128	1485	631	180
6	151912703	153094496	3212	1747	631
6	127540461	129861031	4458	2092	703
6	2458936	3573593	3668	2333	849
6	1452362	2458936	2470	1553	622
6	37572596	39295677	4899	2654	938
6	3573593	4617817	3575	2101	697
6	73924	1452362	4171	2833	1233
6	117672972	118963115	2773	1223	386
6	123856181	125424383	3576	2418	810
6	50386145	52210476	4537	2081	687
6	73450097	75462003	5718	2402	763
6	121905676	123856181	5051	2205	722
6	120512128	121905676	3879	1680	458
6	118963115	119963278	2420	1162	362
6	136224177	137614218	1864	1214	438
6	132765669	134244243	3509	1862	597
6	4617817	5791472	3430	2131	787
6	19207487	21684065	6777	4252	1426
6	134244243	136224177	3957	2355	844
6	6785207	7808936	3465	2254	817
6	129861031	130935454	3202	1718	608
6	125424383	127540461	2997	1618	523
6	142288479	145319810	6024	3387	1161
6	77414881	78957728	4983	1897	489
6	65765742	67329215	5759	2212	615
6	78957728	80691170	4783	2073	673
6	75462003	77414881	3749	1630	536
6	14802924	17386405	6223	3981	1402
6	35455756	37572596	5156	3257	1175
6	165586864	167024733	4976	3148	1106
6	116131396	117672972	3445	1551	514
6	81929222	83127149	2759	1350	411
6	45406563	47311898	4249	2236	822
6	130935454	132765669	4314	2253	754
7	124167552	126519170	6556	2674	671
7	138744679	139933177	2208	1340	518
7	139933177	140235210	1132	698	302
7	972752	1353067	1507	1049	341
7	146427960	147815318	4347	2464	683
7	33555768	36213538	6667	3518	1151
7	144968289	146427960	3830	1770	504
7	126869221	128778386	4471	2247	733
7	142656310	144968289	4563	2181	789
7	126519170	126869221	712	381	118
7	39862670	42001811	4078	2177	746
7	121933630	124156805	5417	2367	716
7	128778386	130422414	3634	2162	787
7	31137289	33555768	7584	3936	1178
7	153674019	154964730	4066	2925	1106
7	121045273	121933630	2119	978	335
7	25077259	25909555	2619	1537	572
7	134307596	135591083	3305	1785	612
7	16902069	19481547	6054	4572	1544
7	20124908	22507629	7453	5433	1791
7	53176312	54222976	3550	1527	453
7	124156805	124167552	39	26	11
7	55691584	57382638	5315	2474	778
7	19481547	20124908	2118	1323	364
7	22507629	23471442	2367	1517	492
7	9123423	9987499	3824	2313	680
7	49212278	51675322	6597	2995	969
7	51675322	53176312	5990	2572	813
7	152249806	153674019	4892	3100	1187
7	76458564	78093859	4969	3027	979
7	92493752	93966601	2504	1410	534
7	1353067	2062398	2003	1499	435
7	98715474	100196651	2102	1052	388
7	107780178	109647594	4558	2291	653
7	85572182	87825004	4590	1832	579
7	101199253	103197510	4294	2366	852
7	135591083	136876562	3331	1765	567
7	71874885	73334602	2203	1293	506
7	103197510	104159525	3263	1832	541
7	9987499	11299198	4597	2691	714
7	100196651	101199253	3012	1753	642
7	68234074	69085364	2416	1282	472
7	73334602	76458564	5385	3403	1300
7	63307359	63641125	876	337	102
7	15143657	16902069	5354	3672	1097
7	37555184	38966703	4613	2423	801
7	156065250	157634597	4809	3054	1104
7	96073508	97099570	2312	1242	437
7	83801203	85572182	3890	1625	454
7	87825004	90661784	8094	3562	999
7	4573428	5416232	3003	2288	779
7	5416232	5854526	1118	886	344
7	65689809	68234074	9226	4192	1343
7	13884202	15143657	3611	2699	876
7	109647594	112618684	5500	3636	1093
7	136876562	138744679	4240	3081	1079
7	69085364	71874885	6505	3738	1277
7	112618684	113712387	2045	1021	308
7	11299198	12635461	5722	3476	916
7	2772227	4573428	6817	4973	1500
7	54222976	55691584	4516	2145	676
7	90661784	92493752	2906	1541	505
7	82022686	83801203	5161	2626	833
7	36213538	37555184	3629	2345	882
7	93966601	96073508	4195	2365	752
7	5854526	6573857	2050	1475	541
7	147815318	149840658	5582	3729	1309
7	116780178	118351581	2535	1237	358
7	7808752	9123423	4710	3506	1173
7	97099570	98715474	4291	2226	747
7	105682905	107780178	4862	3037	992
7	12635461	13884202	4854	3285	938
7	113712387	116780178	5229	2455	863
7	63641125	65689809	5106	2301	646
7	6573857	7808752	4741	3142	1009
7	57382638	63307359	6260	3387	912
7	154964730	156065250	3836	2661	1140
7	2062398	2772227	2080	1600	516
7	132805848	134307596	3238	1599	430
7	44763828	45952922	3130	1699	606
7	28360309	31137289	7196	4800	1769
7	23471442	25077259	4863	2820	880
7	42001811	43159074	2934	1382	483
7	38966703	39862670	2198	1117	376
7	141226557	142656310	3145	1519	541
7	25909555	28360309	5709	3243	1077
7	43159074	44763828	3875	2019	670
7	46986720	49212278	6850	3235	1118
7	140235210	141226557	1690	880	308
7	149840658	150711505	3015	1405	458
7	130422414	132805848	5597	3679	1401
7	78093859	79888069	4678	2398	807
7	79888069	82022686	4710	2829	961
7	104159525	105682905	3479	2267	825
7	157634597	159128575	5176	3209	1141
7	118351581	121045273	3972	1748	523
7	16161	972752	3863	2923	1212
7	150711505	152249806	3325	2458	1038
7	45952922	46986720	3065	1312	412
8	73817199	75445064	3855	2022	764
8	90638162	93554386	4862	2350	691
8	35317232	37379389	2375	1206	431
8	111850847	113064320	2308	819	223
8	131639625	133351144	5205	2512	839
8	85955619	87411709	1992	932	304
8	37379389	38938806	2420	1538	638
8	84225589	85955619	4121	1503	451
8	32977218	35317232	4959	1820	583
8	75445064	76456542	2437	1113	387
8	79132861	81956395	5782	2928	1016
8	82693739	84225589	4535	1575	506
8	95005527	96534806	4140	2342	791
8	126410917	128659111	6193	3710	1337
8	62329099	63349306	2689	1048	322
8	65232872	66489090	2520	1161	431
8	63349306	65232872	4025	1828	531
8	66489090	69863057	6254	3223	1147
8	70867979	72289454	3390	1533	503
8	59728100	62329099	5624	2860	916
8	76456542	79132861	6424	2361	720
8	72289454	73817199	4488	2319	813
8	69863057	70867979	2708	1540	558
8	119685457	121201700	3844	1811	553
8	121201700	124861459	8443	4685	1701
8	124861459	125683719	2107	1201	404
8	128659111	130381139	4421	2398	814
8	9154694	9640787	1816	1179	305
8	24674718	25483454	2173	1140	383
8	9640787	10463197	3075	2429	673
8	6142797	7153079	4370	3207	1121
8	10463197	11278998	2688	2007	530
8	55945581	56956383	2536	1186	415
8	89085481	90638162	3647	1681	448
8	28162392	29327896	2337	1360	480
8	59068651	59728100	1893	909	305
8	22897057	24674718	4833	2825	972
8	26682525	28162392	4665	2308	798
8	93554386	95005527	2340	1346	470
8	5146927	6142797	6235	4424	1263
8	56956383	59068651	5831	2462	800
8	25483454	26682525	3900	2324	877
8	81956395	82693739	1536	736	278
8	31548360	32977218	3277	1775	548
8	46841315	50082470	4086	2158	632
8	41721454	42773823	1456	880	314
8	31133729	31548360	1242	605	196
8	109248173	110484314	2908	1048	314
8	101620958	104123306	6200	3879	1402
8	108648177	109248173	1540	602	200
8	107410754	108648177	3126	1417	466
8	130381139	131639625	3297	1861	574
8	104123306	104988752	2806	930	294
8	110484314	111850847	2241	918	320
8	104988752	107410754	5820	2931	915
8	29327896	31133729	3955	2271	813
8	17387876	17836399	1906	1371	400
8	139254830	140725643	4129	2715	922
8	140725643	143044914	5580	3863	1374
8	50082470	53302930	7760	2740	836
8	20060856	21661737	4681	3331	1046
8	19492840	20060856	1959	1405	473
8	53302930	54418044	3159	1428	406
8	144236881	146303867	4048	2746	960
8	99401581	101620958	2859	1550	523
8	21661737	22897057	2926	2198	776
8	42773823	46841315	1034	665	281
8	143044914	144236881	4144	2376	751
8	17836399	19492840	5991	4513	1461
8	40703337	41721454	2834	1661	569
8	3392926	3783017	3011	2235	631
8	2042942	2573279	3088	2268	817
8	4480476	5146927	3615	2712	803
8	15991660	17387876	4361	3244	1032
8	13944992	15991660	8665	6095	1616
8	11278998	13491775	7970	5720	1865
8	1163245	2042942	4018	3240	1209
8	2573279	3392926	4848	3538	1134
8	54418044	55945581	3245	1550	490
8	136035605	137524151	3748	1965	569
8	133351144	134570001	3417	2184	775
8	137524151	139254830	5885	2842	862
8	13491775	13944992	3086	1915	442
8	134570001	136035605	4743	2709	921
8	10422	1044217	3573	2880	925
8	7153079	9154694	4797	3533	1212
8	96534806	99401581	6857	4055	1435
8	125683719	126410917	1835	1083	400
8	38938806	40703337	5288	2445	768
8	3783017	4480476	4753	3822	1226
8	1044217	1163245	752	551	185
8	87411709	89085481	4228	2088	604
8	113064320	116096495	7722	2648	743
8	116096495	119685457	6562	3689	1254
9	22206559	24158518	4131	3301	1057
9	4884926	6557589	3738	2771	769
9	137589364	138938978	4506	3421	1392
9	8456299	9166403	2368	1818	617
9	7154923	8456299	5020	3769	1177
9	1916877	3190064	4496	3519	1174
9	1079707	1916877	3415	2548	768
9	6557589	7154923	2562	1712	495
9	18661051	20463534	5257	3951	1274
9	129059665	130055510	1994	1267	480
9	14836363	16659655	5330	3820	1153
9	132165470	133223217	2781	1751	726
9	65472190	72512711	6673	4508	1980
9	72753755	74253040	3870	1972	621
9	36743283	38641599	4687	2810	1034
9	134127888	135298842	2807	1769	675
9	74253040	76203946	4273	2105	726
9	133223217	134127888	2289	1655	678
9	9166403	10879253	6382	4556	1356
9	38641599	65472190	4776	3518	1602
9	82590928	84211233	5659	2946	855
9	28811584	30387392	5236	2390	634
9	85440801	86938196	3960	2429	801
9	78900183	79471208	1815	1237	444
9	86938196	88109333	2823	1524	512
9	28224283	28811584	1750	1129	395
9	88590417	90136246	3763	2249	772
9	34642243	36743283	4109	2461	857
9	4495328	4884926	1452	1031	397
9	30387392	31310383	2839	1313	316
9	33578334	34642243	2961	1255	399
9	84211233	85440801	2123	1435	532
9	79471208	81079055	3847	2338	736
9	76203946	76973081	1582	726	250
9	81079055	82590928	3490	2442	828
9	26111757	28224283	5863	4167	1329
9	10879253	12276489	5110	3057	627
9	31310383	32019368	2374	845	245
9	90136246	92528698	6513	3543	1187
9	24158518	25330810	2493	1806	552
9	126971887	129059665	3372	2191	721
9	114831082	115693145	2326	1086	341
9	105967976	107581749	4825	2158	602
9	121321537	122260297	2040	1211	395
9	110695062	112778024	6446	3825	1189
9	96671698	98922040	5153	2776	906
9	104624437	105967976	5148	2426	711
9	92528698	94167203	4256	2383	841
9	115693145	117019801	3546	2265	877
9	107581749	109298754	4230	2381	851
9	117921960	121321537	8868	4876	1596
9	10023	1079707	4392	3411	1082
9	101592859	104624437	6502	3374	1065
9	76973081	78900183	5310	3376	1255
9	122260297	124871322	4698	2913	954
9	72512711	72753755	657	328	110
9	109298754	110695062	3443	2189	858
9	94167203	96671698	5929	3127	988
9	88109333	88590417	620	382	153
9	138938978	139500342	1375	1047	389
9	98922040	101592859	5517	3244	1112
9	112778024	114831082	6402	3679	1268
9	25330810	26111757	2031	1582	523
9	135298842	137041122	5509	3771	1395
9	117019801	117921960	2338	1597	553
9	139500342	141144796	3433	2548	970
9	16659655	18661051	6688	4443	1240
9	32019368	33578334	4861	2481	836
9	20463534	22206559	4200	2910	833
9	124871322	126971887	4192	2682	983
9	3190064	4495328	3863	3094	1075
9	137041122	137589364	1458	1102	452
9	12276489	14836363	7749	5726	1937
10	134494673	135523865	2950	1994	789
10	42372579	43894771	4971	2320	677
10	84383745	85458703	3553	1373	397
10	37790029	42372579	5731	1869	462
10	35109355	36572508	3303	1645	540
10	62659679	63341695	982	461	162
10	60289987	61891409	3600	2000	670
10	58959528	60289987	4368	1544	438
10	57662146	58959528	4274	1336	323
10	55103572	57031140	6976	3582	996
10	57031140	57662146	1674	679	201
10	69900148	70195991	943	432	150
10	50840915	53616629	5209	3008	1026
10	36572508	37790029	3040	1410	477
10	70195991	72220850	5982	3545	1379
10	61891409	62659679	2092	1073	319
10	73508512	75422550	3091	1376	463
10	67549615	69900148	7212	3036	932
10	100241302	100668400	1011	518	146
10	97822357	100241302	5241	3209	1159
10	78706814	80876749	4957	3212	1153
10	31907519	33707968	5253	2414	749
10	96221243	97822357	4510	1860	558
10	85458703	87937577	7013	3174	1086
10	108726686	110317705	4860	2665	733
10	75422550	78706814	5156	2867	901
10	82414679	84383745	5229	2473	842
10	110317705	112561493	5140	2543	797
10	48760450	50840915	4042	2244	767
10	18537267	19716878	4665	2652	733
10	93335047	95396368	5123	2606	855
10	15026068	16551767	4224	2931	873
10	95396368	96221243	1576	899	278
10	92006581	93335047	3127	1529	500
10	16551767	18537267	5326	3723	1235
10	91013381	92006581	2677	1445	437
10	43894771	44730075	2457	1078	364
10	116421406	119523934	6362	3663	1230
10	123231465	123900545	2095	1298	495
10	112561493	115328432	5792	3852	1309
10	115328432	116421406	2729	1605	558
10	120591353	122407323	4818	2870	1051
10	122407323	123231465	2308	1485	516
10	132580245	134336329	6907	4481	1700
10	131741327	132580245	3017	1572	563
10	129154362	130844284	6048	3793	1543
10	29783692	30458838	2252	1431	501
10	29323236	29783692	1768	1031	399
10	65794114	67549615	4395	1914	573
10	106695048	108726686	5072	2655	780
10	100668400	102949239	5028	2654	923
10	119523934	120591353	2445	1497	578
10	128001098	129154362	2931	1931	722
10	8774665	10249396	4295	2422	770
10	10249396	12586797	6908	4725	1739
10	7171484	8774665	5486	3589	1338
10	19716878	22772283	6978	4533	1327
10	125869346	128001098	5973	3791	1316
10	63341695	65794114	6114	2830	968
10	12586797	13321600	2721	2021	780
10	751339	1523544	2629	1792	630
10	89127064	91013381	4080	2269	838
10	60523	751339	1074	852	292
10	5983762	7171484	4329	3203	1280
10	123900545	125869346	5587	3614	1292
10	25578596	26888684	5367	2259	682
10	134336329	134494673	234	154	52
10	3352699	4572274	3678	2224	816
10	4572274	5983762	5598	3302	1115
10	2254500	3352699	4301	2777	1039
10	130844284	131741327	2536	1571	566
10	1523544	2254500	2849	1719	656
10	72220850	73508512	4200	2826	1100
10	13321600	15026068	5366	3999	1372
10	22772283	23175132	800	595	160
10	30458838	31907519	3866	2093	680
10	23175132	25578596	5241	3095	1013
10	33707968	35109355	3107	1904	638
10	53616629	55103572	4834	2642	821
10	104380410	106695048	4598	2699	837
10	44730075	48760450	6712	3694	1408
10	87937577	89127064	2760	1595	542
10	102949239	104380410	2318	1245	427
10	26888684	29323236	7782	3867	1319
11	42310003	44693799	6481	3500	1208
11	17578402	19569535	5521	3060	1070
11	47006137	49866050	7410	2676	619
11	109866116	111114397	3298	1707	514
11	120766806	121175943	1080	602	200
11	121175943	122591910	3004	1903	690
11	117747110	119215476	3414	1991	652
11	122591910	123500117	2576	1725	699
11	123500117	124495528	3434	1432	428
11	119215476	120766806	3888	2519	888
11	124495528	126311320	4997	2889	1075
11	44693799	47006137	4305	2542	910
11	69516130	70926292	3653	2382	852
11	78355058	80722373	5600	4379	1465
11	32276901	33958739	3984	2112	720
11	6322869	7436701	3263	1883	633
11	7436701	8333274	3338	2155	773
11	72286017	74412351	4186	2236	761
11	76797209	78355058	3421	1804	490
11	8333274	9087317	1908	1210	341
11	65898631	68005825	3687	2086	704
11	49866050	54695473	6875	1838	367
11	10952027	12564229	5563	4043	1526
11	111114397	112459488	2219	1184	428
11	114830666	116383348	3437	2415	858
11	114257728	114830666	1545	773	240
11	62223771	63804569	2588	1459	536
11	54695473	55082657	1507	440	94
11	58457495	58780549	648	247	74
11	9087317	10952027	5299	3161	911
11	35502605	37116815	4030	2491	849
11	37116815	39382003	4795	1878	599
11	39382003	42310003	7135	3648	1132
11	70926292	72286017	3297	1582	533
11	108437037	109866116	2521	1602	475
11	30141357	32276901	3865	1936	597
11	21017138	22374142	3883	2290	739
11	106520894	107844200	3629	2154	652
11	24088517	26045753	7400	3554	988
11	27020461	28481593	2609	1224	406
11	89208936	90966490	4489	2107	576
11	55082657	58457495	11977	3652	870
11	101331121	103959636	8436	4047	1262
11	74412351	76797209	4616	2811	1029
11	58780549	62223771	6944	3779	1337
11	81266712	84381272	8251	4803	1332
11	90966490	92077144	2856	1354	390
11	104873284	106520894	3516	1562	459
11	86619301	87430235	3029	1334	391
11	80722373	81266712	1825	1093	355
11	87430235	89208936	4606	2572	730
11	4746709	6322869	7235	3736	1152
11	3665481	4746709	3937	2495	737
11	100417169	101331121	3003	1446	460
11	98705065	100417169	5880	3833	1113
11	1213590	3665481	8512	5874	2175
11	26045753	27020461	2807	1271	432
11	128188537	130342575	5137	3366	1300
11	112459488	114257728	4340	2477	873
11	92077144	93276157	2590	1348	398
11	70855	1213590	3608	2428	949
11	63804569	65898631	3333	2071	754
11	19569535	21017138	4234	2962	1069
11	134205993	134946452	3126	2009	767
11	33958739	35502605	4794	2307	814
11	127316679	128188537	2206	1144	390
11	131074612	133000046	5251	3797	1413
11	126311320	127316679	2878	1660	654
11	93276157	94242260	2249	1126	313
11	107844200	108437037	1004	511	142
11	68005825	69516130	3440	2055	714
11	116383348	117747110	3879	2578	889
11	22374142	24088517	5765	2628	728
11	28481593	30141357	3203	1751	534
11	94242260	95726041	3168	1883	706
11	84381272	86619301	5243	3120	901
11	103959636	104873284	2217	862	241
11	97057058	98705065	5080	2790	812
11	95726041	97057058	3110	1866	642
11	133000046	134205993	2867	2019	806
11	130342575	131074612	2123	1382	502
11	12564229	13373124	2365	1300	452
12	65559695	67181144	3289	1814	641
12	96020785	97108839	3266	1875	684
12	99305987	101447641	4393	2409	814
12	97108839	99305987	5569	3293	1160
12	101862690	102964986	2237	1323	447
12	101447641	101862690	1036	612	207
12	130377921	131786751	5667	3911	1468
12	40816185	41658586	2499	1110	330
12	43984474	46024229	3855	1617	534
12	41658586	43984474	6755	3201	979
12	127875098	129237297	4679	3151	1258
12	67909729	69826542	4743	3027	1093
12	29651255	30512406	3483	1712	543
12	83502666	84303844	2329	822	252
12	70957987	72645075	3730	1921	679
12	32165592	33076989	3651	1850	609
12	27799773	29651255	5137	2461	794
12	72645075	73818454	2960	1305	374
12	115036602	115503216	1387	912	378
12	110336719	113263518	3307	1835	612
12	80448150	81467767	2464	1096	361
12	113263518	113986709	1589	912	330
12	131786751	132807034	3050	1933	705
12	85990426	89682122	7369	2712	843
12	109025901	110336719	3079	1804	643
12	102964986	104848696	5207	2762	994
12	118135375	119754110	4661	2813	1079
12	104848696	106436213	4384	2531	859
12	117087471	118135375	2560	1715	630
12	113986709	115036602	3502	2102	746
12	84303844	85990426	3572	1358	396
12	115503216	117087471	4217	2969	1127
12	67181144	67909729	1893	866	328
12	106958748	109025901	5057	2625	871
12	119754110	122007651	5477	3062	1059
12	73818454	76511314	6106	3117	1002
12	106436213	106958748	1171	740	270
12	25371083	27799773	6966	3664	1284
12	20863943	23820634	7747	4058	1307
12	132807034	133841511	3161	2062	735
12	33076989	37856717	4694	1768	369
12	81467767	83502666	4794	2104	701
12	30512406	32165592	5609	3143	1085
12	39227169	40816185	3626	1741	516
12	23820634	25371083	4263	2915	1038
12	55665837	57548860	3275	1609	611
12	94514567	96020785	5083	2928	1097
12	61123729	64032461	8230	3806	1162
12	64032461	65559695	3238	1775	641
12	59308666	61123729	3809	1655	483
12	126445505	127875098	4454	2418	847
12	57548860	59308666	3303	1595	518
12	122007651	124977980	6379	3634	1239
12	15241484	16310460	1524	874	345
12	37856717	39227169	3066	1313	263
12	61107	1080331	2711	1999	871
12	8377536	9031395	2123	1307	451
12	2544786	3677037	3146	2088	836
12	54778823	55665837	2283	973	355
12	11754846	12733528	2911	2058	783
12	46024229	47714793	3380	1770	570
12	16310460	18087873	4082	2383	699
12	51776494	53039004	3470	1988	712
12	1080331	2544786	3581	2306	963
12	12733528	15241484	6506	4289	1519
12	6419753	8377536	4991	3264	1253
12	47714793	49001866	4365	2026	659
12	129237297	130377921	4272	3106	1191
12	18087873	20863943	8283	4993	1595
12	124977980	126445505	4436	2922	1145
12	49001866	51776494	5043	2582	939
12	3677037	4417679	2080	1416	627
12	76511314	78570570	5275	2911	986
12	69826542	70957987	3642	1766	531
12	89682122	92066155	4704	2156	728
12	92066155	94514567	6125	3475	1299
12	53039004	54778823	3687	2165	810
12	4417679	5321472	2421	1640	630
12	5321472	6419753	3167	1957	732
12	78570570	80448150	2963	1490	561
12	10481534	11754846	3968	1883	568
12	9031395	10481534	4535	2498	853
13	106247554	106750000	1778	1005	372
13	109121210	109815112	2233	1220	460
13	106750000	108189877	3550	2338	900
13	112247592	113572488	3433	2377	909
13	108189877	109121210	2769	1650	665
13	111232073	112247592	3275	1991	726
13	100574095	102300523	4668	2761	917
13	102300523	104066710	4862	2837	975
13	104844114	106247554	3925	2307	852
13	55817131	57554217	3432	1177	342
13	33776903	35026464	2767	1397	498
13	36046367	37498185	4026	2208	771
13	49383962	51591091	4972	2682	943
13	24531937	25784362	5176	3034	1087
13	29257551	30483267	3646	1719	629
13	20686720	22242174	4858	2978	1022
13	47431079	49383962	4619	2338	735
13	25784362	27284362	3741	2136	745
13	97519210	98938919	2765	1828	640
13	51591091	53339622	2447	1565	603
13	41069263	43101027	4587	2245	753
13	32301815	33776903	3333	1697	621
13	37498185	38878163	4217	1866	574
13	22242174	23594702	4722	2968	1184
13	19020013	20686720	5708	3016	906
13	44901409	46495214	3292	1904	717
13	77410555	78808813	2957	1492	501
13	23594702	24531937	3825	2233	797
13	30483267	32301815	4982	2925	1141
13	88559882	90521311	4857	1901	582
13	59302271	60854778	3859	1978	638
13	43101027	44901409	4267	2385	855
13	58410626	59302271	2111	846	244
13	57554217	58410626	1914	731	206
13	54682864	55817131	2905	1161	374
13	53339622	54682864	3039	1669	541
13	75670143	77410555	4739	2779	875
13	46495214	47431079	2303	1247	426
13	82581814	84133144	3942	1455	417
13	98938919	100574095	4873	3052	1056
13	84133144	85610916	4024	1724	517
13	85610916	88559882	8512	3388	956
13	38878163	41069263	5321	2984	1097
13	71526791	73934089	5936	3613	1246
13	73934089	75670143	4525	2621	933
13	80585676	82581814	5289	2608	866
13	65200602	67844453	5524	2613	871
13	63971559	65200602	3859	1232	350
13	93586455	96087558	7321	4286	1519
13	90521311	93129691	7163	3354	1091
13	67844453	70724516	8634	3620	1078
13	78808813	80585676	3549	2015	612
13	61591949	63971559	7172	2859	802
13	70724516	71526791	2510	1372	471
13	27284362	29257551	5980	3497	1294
13	93129691	93586455	1019	600	188
13	35026464	36046367	1751	959	348
13	104066710	104844114	2190	1206	411
13	96087558	97519210	2594	1382	396
13	113572488	115109853	4181	2766	1020
13	109815112	111232073	4749	3282	1276
13	60854778	61591949	2416	1165	346
14	71131957	72889615	4176	2364	747
14	76444767	77229472	2216	1396	558
14	77229472	78561945	4384	2500	932
14	67992317	71131957	7639	4285	1523
14	72889615	76444767	8193	4714	1622
14	55233681	56216880	2634	1191	326
14	56216880	57481262	3619	2280	761
14	61680424	63790015	5277	3418	1077
14	59448336	61680424	4721	2250	647
14	57481262	59448336	4767	2740	906
14	105001723	106340358	3276	2402	878
14	44543227	46081896	3164	1549	498
14	99138532	101534307	5410	3688	1464
14	43137389	44543227	4021	2092	556
14	41615502	43137389	3986	1930	451
14	106340358	107289454	4588	3628	872
14	98341162	99138532	2638	1269	453
14	46749130	48573586	5376	2727	763
14	48573586	49005471	1346	487	138
14	46081896	46749130	1930	797	186
14	51493572	53474383	5782	3328	1127
14	50507760	51493572	2304	1499	507
14	26135686	28466533	5509	3055	1022
14	24905123	26135686	3969	1859	585
14	95750867	96262415	1984	1233	506
14	89497643	91296860	4681	2850	1088
14	49005471	50507760	3480	2083	652
14	53474383	53997831	1523	682	203
14	87635341	89497643	4467	2036	641
14	94325285	95750867	5008	2961	1178
14	35859593	38667725	5498	2998	989
14	80186579	81579714	3469	1960	558
14	21589402	23018665	5116	2796	999
14	66399555	67992317	2934	1155	386
14	85746319	86647002	2259	1436	412
14	32383265	34846251	6791	5078	1993
14	81579714	83138097	3436	1690	620
14	23018665	24905123	4864	3007	1281
14	29972145	32383265	4710	2722	952
14	19002084	21589402	6049	4488	1965
14	84241633	85746319	3954	2189	688
14	65220298	66399555	2847	1660	551
14	78561945	80186579	3106	1958	689
14	28466533	29972145	3156	1609	558
14	63790015	65220298	2887	1575	507
14	38667725	40341990	4614	2312	642
14	40341990	41615502	4555	1605	412
14	83138097	84241633	2979	1408	512
14	34846251	35859593	3295	1655	512
14	103012102	105001723	4791	2966	1013
14	53997831	55233681	2443	1575	584
14	101534307	103012102	3437	2148	864
14	86647002	87635341	2531	1353	441
14	96262415	98341162	5175	3041	1206
15	99244059	100636847	4399	2850	970
15	32441811	34015425	4102	2817	1134
15	31591821	32441811	2018	1196	415
15	34015425	35083251	3766	2099	732
15	35083251	37456502	5839	3335	1313
15	30165568	31591821	2503	1657	639
15	93780902	94924330	4262	2813	1116
15	101552694	102520966	2745	2103	828
15	96141596	98030910	4766	3218	1256
15	100636847	101552694	3123	2139	805
15	37456502	38530777	2770	1672	497
15	78516053	80860978	6995	4266	1442
15	65104668	67094767	4435	2770	927
15	76398624	78516053	4688	2462	764
15	67094767	69017999	4266	2552	871
15	44198049	46618787	3808	2112	724
15	51677560	53069096	2781	1578	496
15	63215222	65104668	3814	2192	723
15	70133341	71922649	4098	2807	1038
15	56901773	58441366	3469	2585	765
15	20001200	21131604	1348	1082	700
15	90475551	92164392	5054	3515	1102
15	29338502	30165568	1994	1175	433
15	24195127	25108590	5334	2445	555
15	27298112	29338502	3865	2323	875
15	71922649	73628714	2393	1418	468
15	54508528	55136269	2026	1234	340
15	53069096	54508528	4260	2382	724
15	69017999	70133341	1774	1144	425
15	41177514	42776399	3383	1864	611
15	55136269	56901773	5436	2903	830
15	80860978	84260468	5702	3941	1329
15	42776399	44198049	1699	905	277
15	86652905	88369943	4940	3519	1033
15	58441366	59694116	3259	2451	780
15	84260468	86652905	6337	4073	1135
15	48136048	50008043	2939	1419	433
15	61265836	63215222	4854	3724	1301
15	40384132	41177514	1683	998	324
15	50008043	51677560	4252	2138	641
15	59694116	61265836	3864	2801	959
15	46618787	48136048	3678	1884	572
15	25108590	27298112	6074	4031	1597
15	92164392	93780902	5139	3854	1380
15	73628714	76398624	4360	2698	947
15	21131604	24195127	4536	3468	1722
15	88369943	90475551	4939	3508	1156
15	94924330	96141596	3382	2276	839
15	38530777	40384132	4752	2896	983
16	71054028	72935150	3435	2299	629
16	60745694	62229849	2815	1367	431
16	63691589	65938566	5791	3146	1000
16	72935150	74971503	5082	4024	1446
16	62229849	63691589	3496	1953	629
16	60054	1207206	3617	2787	1036
16	1207206	2764829	4298	2890	968
16	5891580	6893551	4519	3639	1247
16	89041165	90292812	3940	2760	860
16	87647349	89041165	5680	4357	1544
16	5118345	5891580	3273	2562	788
16	59045405	60745694	4399	2517	757
16	57664330	59045405	4242	2488	892
16	2764829	4001196	2875	2095	714
16	4001196	5118345	3013	2334	796
16	18643607	20150571	3704	2226	779
16	9799419	10426032	2375	1478	433
16	16154060	17644749	3123	2280	901
16	10426032	11520161	3899	2838	933
16	81772536	82747728	3830	2869	1033
16	82747728	83477208	3574	2799	907
16	78456292	79134815	3357	2729	980
16	17644749	18643607	1788	1255	426
16	11520161	12613098	3338	2345	699
16	85148685	86156599	3521	3013	1260
16	75977954	77523678	5568	3606	937
16	13154437	14464002	3845	2461	815
16	80297374	81772536	5461	4088	1313
16	79134815	80297374	4410	3293	1051
16	8338519	9799419	6255	4357	1426
16	74971503	75977954	2595	1643	478
16	65938566	68841363	4328	2663	850
16	7529121	8338519	4048	2663	898
16	77523678	78456292	4744	3095	1030
16	6893551	7529121	3641	2553	711
16	86156599	86815411	3013	2463	944
16	84445883	85148685	3440	2673	978
16	12613098	13154437	2715	1617	481
16	86815411	87647349	2423	2068	753
16	46399473	49007926	2568	1409	602
16	22448904	24136875	3597	2173	886
16	20150571	22448904	3623	2090	851
16	52035823	53382572	3097	1552	536
16	25986862	27445755	4553	2933	1142
16	49007926	52035823	6453	4037	1565
16	53382572	55903774	7025	4369	1594
16	31382943	46399473	2838	2026	973
16	27445755	29036613	2356	1553	602
16	29036613	31382943	3258	2111	705
16	24136875	25986862	5457	3259	1249
16	14464002	16154060	2619	1965	739
16	68841363	71054028	3856	2521	803
16	55903774	57664330	4223	2745	1052
16	83477208	84445883	4517	3698	1400
17	16412342	18856320	5245	3168	1044
17	21290357	27334244	5270	3173	1189
17	15019097	16412342	2915	1878	632
17	18856320	21290357	3936	2403	828
17	3702312	4696261	3038	2103	809
17	4696261	5741334	3286	1961	624
17	5741334	7317398	4745	3457	1324
17	1928731	3702312	5482	3663	1387
17	8306425	9965921	4670	3207	1272
17	38877404	39899810	3179	1420	467
17	27334244	29786491	3783	1936	607
17	39899810	41772087	3329	1835	664
17	32912798	34469036	3482	1998	758
17	34469036	36809344	4285	2964	1217
17	36809344	38877404	3457	2119	797
17	13180372	13894637	2630	1583	652
17	45876022	47517400	3945	2086	736
17	13894637	15019097	4147	2483	924
17	64800430	67858770	7180	4517	1644
17	49898957	50719055	1805	834	236
17	51826118	53599432	4249	2304	812
17	50719055	51826118	2934	1295	385
17	69387817	72672203	9190	6716	2674
17	61545589	63148128	2325	1410	496
17	74375560	76263413	5875	4028	1636
17	1172399	1928731	2651	1886	748
17	43056905	45876022	8033	3546	1028
17	76263413	77298636	3538	2705	1077
17	57487512	59312755	2015	1070	402
17	67858770	69387817	4360	2442	803
17	56	1172399	4312	3361	1501
17	55357541	57487512	4026	2558	1001
17	53599432	55357541	3984	2157	842
17	31538425	32912798	4319	2515	918
17	72672203	74375560	3670	2315	842
17	47517400	49898957	5131	3616	1407
17	78837588	80034408	3625	2408	894
17	80034408	81194908	3624	2297	760
17	11102815	12534769	3588	2423	857
17	77298636	78837588	4876	3370	1306
17	12534769	13180372	2256	1391	528
17	7317398	8306425	2353	1657	608
17	59312755	61545589	3594	2387	846
17	63148128	64800430	4893	2618	872
17	29786491	31538425	3940	2477	911
17	41772087	43056905	2598	1516	509
18	44299246	45939732	3877	2466	854
18	45939732	47730584	5045	3051	1076
18	42922106	44299246	3630	2206	747
18	66125817	67175820	2421	1323	488
18	69621618	71038474	4498	2404	849
18	64252801	66125817	5812	3021	965
18	61820252	63463402	4318	2122	640
18	25927682	26875587	1893	801	236
18	63463402	64252801	2291	936	262
18	24026191	25927682	4255	2566	959
18	22996651	24026191	1972	1128	371
18	51554175	55213838	7163	3818	1287
18	60277715	61820252	3591	1828	662
18	59020751	60277715	3669	2069	747
18	27866478	30264066	5913	3034	1055
18	67175820	68621179	3376	2087	816
18	55213838	56530220	4278	2559	926
18	47730584	51062185	8141	4738	1455
18	56530220	57630483	3576	2375	840
18	36365490	37684367	2479	1270	381
18	37684367	39892648	5272	2259	793
18	35075250	36365490	2950	1461	509
18	51062185	51554175	1979	765	183
18	39892648	42922106	6694	3278	1045
18	26875587	27866478	2590	1132	317
18	73526987	74813815	4020	2762	1119
18	75976317	77149991	4161	2313	857
18	77149991	78017158	3000	1926	701
18	71971462	73526987	3532	2242	850
18	10644	912486	3325	2264	939
18	31780067	33861964	4257	2093	697
18	71038474	71971462	3017	2025	751
18	8498931	11075913	8590	5333	2089
18	33861964	35075250	2427	1439	499
18	1942911	3891658	6439	4360	1727
18	912486	1942911	3009	1558	568
18	11905440	14440799	7560	4378	1513
18	14440799	19485844	3080	1700	511
18	30264066	31780067	2487	1083	363
18	5834180	7090485	3280	2139	889
18	11075913	11905440	2442	1473	582
18	7090485	8498931	3562	2248	856
18	20649472	22996651	4708	3171	1112
18	3891658	5834180	5688	3652	1418
18	74813815	75976317	4717	2845	1096
18	57630483	59020751	2957	1645	517
18	19485844	20649472	2401	1333	440
19	44744108	46102697	3737	2419	928
19	36469295	37527033	2662	1182	370
19	30727954	32746520	3683	2142	819
19	32746520	34262952	4547	2601	935
19	34262952	36469295	5558	3453	1361
19	37527033	40170619	6137	3496	1122
19	40170619	40984601	1816	1105	413
19	29790947	30727954	2719	1640	613
19	6684885	8347513	6069	4134	1623
19	20905757	22732896	6994	2518	723
19	55728080	57521335	5830	4185	1823
19	57521335	59118839	4529	2819	900
19	42131573	43862455	4181	1952	586
19	9238393	11284028	5400	2993	1085
19	8347513	9238393	2650	1630	666
19	22732896	23467746	2613	1079	280
19	23467746	28557893	6331	2296	713
19	49282227	51532567	6199	4346	1756
19	52985290	54602362	7996	5593	2259
19	46102697	47150082	3012	1905	752
19	28557893	29790947	4256	2029	589
19	54602362	55728080	4894	3518	1427
19	51532567	52985290	4759	2915	1178
19	47150082	49282227	5593	3547	1369
19	3019660	4348967	4268	3262	1369
19	16374416	18409862	5912	3955	1576
19	13471127	14486347	2387	1727	707
19	80840	610729	1700	1373	625
19	2098396	3019660	3202	2388	940
19	18409862	19877471	2990	1891	689
19	5811852	6684885	2330	1688	689
19	15648610	16374416	3737	1725	545
19	4348967	5811852	4461	3400	1351
19	11284028	13471127	4357	2582	978
19	14486347	15648610	3615	2252	870
19	40984601	42131573	2992	1887	698
19	43862455	44744108	2321	1253	460
19	610729	2098396	4764	3956	1694
19	19877471	20905757	3453	1605	475
20	40585689	41615460	2507	1786	608
20	58406572	59561724	2694	1622	590
20	49239658	52472549	8727	5581	2029
20	42680176	44839056	5064	2847	1027
20	56447959	58406572	4609	3226	1324
20	38436761	39610856	2657	1711	544
20	36909530	38436761	3101	1768	565
20	41615460	42680176	2632	1633	622
20	54055266	56447959	6810	4661	1784
20	3828413	5477850	5642	3608	1349
20	5477850	7084073	4641	2898	1092
20	47199980	49239658	5229	2888	953
20	24717724	25344231	1943	805	232
20	31614823	32813441	1767	1057	363
20	39610856	40585689	1867	1063	324
20	25344231	31614823	6668	3132	975
20	44839056	47199980	5875	3996	1447
20	34960446	36909530	3170	1837	683
20	697600	2469501	5598	3611	1506
20	11249536	12447499	3383	1625	534
20	9730921	11249536	4079	2371	920
20	18972203	20959710	4333	2656	970
20	61301855	62190180	3140	2199	868
20	59561724	61301855	5822	3865	1452
20	62190180	62965163	2332	1515	582
20	17487232	18972203	4410	2400	865
20	12447499	13689864	3542	1970	694
20	8117011	9730921	3970	2239	801
20	32813441	34960446	3303	1465	464
20	15958359	17487232	4985	2790	1006
20	22491456	23293790	1859	1058	334
20	60479	697600	1833	1428	649
20	20959710	22491456	2639	1156	394
20	52472549	54055266	4037	2588	908
20	13689864	15958359	5434	3395	1159
20	23293790	24717724	3892	1834	609
20	2469501	3828413	3766	2331	882
20	7084073	8117011	2768	1325	396
21	37870779	38711704	2222	1236	441
21	40482902	41389527	3364	1822	602
21	36524373	37870779	3698	2302	735
21	41389527	43321528	6290	4474	1689
21	38711704	40482902	4814	3044	1063
21	35225465	36524373	3136	2081	762
21	46177105	47492226	4276	3001	980
21	19480375	20962339	4826	2805	917
21	31197025	32668642	3732	1562	544
21	22072764	23362875	4084	2203	735
21	29125226	31197025	5551	2896	765
21	23362875	24696231	3597	1762	596
21	47492226	48119752	2357	1360	427
21	26469122	27271019	1799	1003	279
21	9411243	15950982	6982	4976	2839
21	27271019	29125226	5813	3671	1232
21	44506268	46177105	4450	3152	1124
21	24696231	26469122	5840	3042	973
21	34376999	35225465	1870	1216	467
21	20962339	22072764	3584	1947	645
21	43321528	44506268	4689	2936	1104
21	32668642	34376999	4584	2742	983
22	48903703	49824534	5402	3747	1435
22	47596318	48903703	4413	3100	1126
22	49824534	51243298	4439	3083	1118
22	17674295	18296088	2136	1418	617
22	18296088	19912358	4277	2811	1169
22	19912358	22357325	5014	3241	1382
22	26791628	27834752	3565	2444	1066
22	23712647	24984204	3394	2074	770
22	22357325	23712647	5153	3536	1119
22	31439918	32664986	2604	1442	451
22	24984204	26791628	5083	3519	1358
22	44995308	46470495	5176	3679	1390
22	42690818	43714200	3373	2328	762
22	39307894	40545797	2648	1743	626
22	46470495	47596318	3542	2343	807
22	29651799	31439918	3817	2211	732
22	43714200	44995308	4272	2999	1134
22	37570269	39307894	3815	2546	876
22	40545797	42690818	3865	2215	586
22	34494914	35530985	3379	1736	501
22	32664986	34494914	5476	3523	1291
22	35530985	37570269	5726	3602	1345
22	16050408	17674295	3236	2232	892
22	27834752	29651799	3405	2272	855

## Sheet: ST3b
Supplementary Table 3b: Effective number of variants within LD Blocks in EUR population with MAF greater than or equal to 0.02.
CHR	Start Position	End Position	Number of Raw Variants	Unique Variants	Effective Number of Tests
1	204681068	206073265	3785	2293	950
1	203334734	204681068	3902	2492	1023
1	21736588	23086883	5031	3149	1287
1	27401867	30161881	5859	3240	1304
1	71372470	71684405	840	377	136
1	18662899	20469149	6499	3743	1600
1	68477895	69687616	3435	1737	706
1	30161881	32438685	7042	4028	1578
1	69687616	71372470	4655	2361	868
1	66939404	68477895	4956	2501	955
1	59890409	61922365	4998	2771	1188
1	65041704	66939404	5407	2618	1008
1	74326907	76728135	6522	2882	1018
1	61922365	63455089	4523	2677	1071
1	63455089	65041704	5117	2611	1062
1	144977494	148361253	5153	2960	1400
1	71684405	74326907	6186	2543	916
1	23920590	25516845	4399	2778	1134
1	158027412	159913048	6307	2974	1162
1	169086324	170557776	5521	2140	688
1	159913048	162346721	7514	4358	1772
1	20469149	21736588	3887	2168	836
1	10583	1892607	4114	2816	1193
1	46899501	48002576	2924	1638	588
1	25516845	27401867	3808	2266	885
1	196176201	197311514	2461	1142	366
1	200137649	201589975	4945	2878	1154
1	197311514	199239884	4647	2441	844
1	191868930	194107442	5744	2816	1004
1	189904130	191868930	5640	2493	787
1	194107442	196176201	7150	2786	971
1	186810023	188759945	7610	3184	1114
1	199239884	200137649	3340	1507	542
1	201589975	203334734	4532	2911	1238
1	166460517	169086324	8494	4792	1956
1	208410364	210787750	6809	4212	1653
1	40200567	41975327	5505	2937	1234
1	165191702	166460517	3935	2215	887
1	156336133	158027412	5025	2570	1079
1	111741737	113273306	4862	2742	1124
1	188759945	189904130	3321	1166	388
1	43758457	44969183	2577	1544	584
1	23086883	23920590	1904	1123	437
1	99800604	100826405	2801	1256	491
1	83991748	84844495	2323	1130	419
1	93536459	94506191	2494	1008	394
1	102041016	102898745	3188	1217	468
1	102898745	103914211	3492	1099	394
1	100826405	102041016	3533	1806	687
1	110303931	111741737	4125	2513	1008
1	96150893	97885249	4913	2292	823
1	88128631	90066303	5008	2484	998
1	97885249	99800604	5111	2427	954
1	94506191	96150893	4756	2689	1040
1	103914211	106087842	7563	3033	994
1	38731847	40200567	4154	2498	1019
1	32438685	34799758	5257	3036	1258
1	175089768	177433381	6232	3109	1178
1	178954470	181144121	7310	3294	1164
1	91886317	93536459	4331	2244	804
1	90066303	91886317	4668	2585	1035
1	84844495	86454751	5250	2770	1093
1	108409665	110303931	5213	2660	1132
1	34799758	37549183	5759	3426	1479
1	81354191	83991748	8630	4703	1716
1	234599434	235819436	3881	2356	1026
1	224938520	226810860	5499	2786	1049
1	113273306	114873845	4012	2374	965
1	233429284	234599434	4589	2683	1107
1	238567807	239925314	4822	2537	996
1	106087842	108409665	6525	3236	1253
1	173097907	175089768	4701	1847	616
1	182755356	184595513	5228	2429	908
1	237555628	238567807	3964	2157	799
1	235819436	237555628	6352	3883	1513
1	240564091	241582220	3615	2425	1079
1	226810860	229156248	7051	3533	1209
1	170557776	173097907	7472	3658	1322
1	230685255	232090252	4468	2632	1090
1	10806984	11777841	2963	1816	767
1	232090252	233429284	4735	2682	1101
1	41975327	43758457	4760	2325	851
1	218705513	219590571	2902	1336	485
1	212842330	214578266	5095	2869	1147
1	214578266	216243634	4767	2507	931
1	219590571	221858231	6778	3155	1169
1	229156248	230685255	4349	2674	1131
1	177433381	178944309	3830	2054	732
1	79661198	81354191	5977	2718	877
1	221858231	222230220	1016	642	236
1	5913893	7247335	3938	2548	977
1	7247335	9365199	6093	4175	1640
1	242071602	244109499	6285	3892	1423
1	184595513	186810023	4688	2458	882
1	9365199	10806984	3683	2157	931
1	1892607	3582736	5761	4104	1770
1	4380811	5913893	6535	4039	1662
1	210787750	212842330	6928	3488	1358
1	76728135	79661198	8681	4236	1645
1	241582220	242071602	1800	1092	470
1	216243634	218705513	7932	4253	1636
1	148361253	151538881	4879	2859	1342
1	153180829	154770403	3793	2184	882
1	239925314	240564091	2546	1566	601
1	54226262	56413117	7183	4120	1652
1	86454751	88128631	5193	2421	939
1	154770403	156336133	2579	1567	656
1	178944309	178954470	34	25	12
1	16897730	18662899	6136	4144	1941
1	14891511	16897730	7224	4267	1764
1	11777841	12779466	2957	1928	798
1	44969183	46899501	4317	2025	752
1	244109499	245506746	4762	3210	1384
1	118839067	144977494	7911	5077	2587
1	114873845	115880593	2867	1323	503
1	51713726	54226262	5884	2822	1147
1	58865399	59890409	3272	1642	651
1	115880593	118839067	7811	3970	1627
1	3582736	4380811	3123	1892	828
1	151538881	153180829	4231	2017	703
1	57021728	58865399	5778	3270	1272
1	48978188	49894177	1619	915	350
1	222230220	224938520	7263	4152	1506
1	49894177	51713726	2623	1158	429
1	206073265	208410364	4940	2931	1221
1	162346721	165191702	8996	4728	1935
1	37549183	38731847	3348	1930	805
1	181144121	182755356	4712	2531	998
1	56413117	57021728	2029	1053	365
1	12779466	14891511	6009	3856	1672
1	48002576	48978188	2394	1397	534
1	247344518	249239466	6859	3742	1465
1	245506746	247344518	8103	4757	1817
2	29217559	30463711	3960	2671	985
2	24686918	26894985	5436	3175	1188
2	89154526	95326452	2681	2103	876
2	26894985	28598777	3144	1893	637
2	23341383	24686918	4029	2172	814
2	19692404	21050490	4717	2813	1122
2	10133	1781022	7706	4385	1581
2	28598777	29217559	1940	1247	481
2	3973779	5708337	5842	3408	1376
2	30463711	31550450	3933	2570	912
2	16329735	18647423	7430	3735	1477
2	18647423	19692404	3009	1661	633
2	33363777	35345028	8287	5337	1751
2	6836254	8422147	4596	2612	1109
2	67226166	68010176	3052	1876	618
2	76913661	78079264	4589	2846	936
2	75630086	76913661	4857	2681	892
2	69139564	70755198	3858	2156	779
2	80050403	81620841	4329	2736	965
2	60292000	62429044	5223	3500	1155
2	198078110	199311125	2380	1134	390
2	208645399	209941529	3489	1889	676
2	195861164	196447456	1936	907	325
2	199311125	201576284	4563	2611	940
2	57429100	58297315	3170	1739	459
2	218395480	220454551	4501	2593	1090
2	214014282	215573795	4271	2367	733
2	215573795	217715661	6483	4090	1585
2	65933444	67226166	4055	2314	876
2	58297315	60292000	5059	3608	1185
2	73174848	75630086	5857	3709	1263
2	189882065	191973357	5298	2328	846
2	68010176	69139564	3837	2019	761
2	31550450	33363777	4497	3220	989
2	1781022	3973779	8136	5107	2110
2	64625913	65933444	4021	2419	1003
2	212379518	214014282	5880	3562	1201
2	56203345	57429100	3917	2713	742
2	182266031	184357608	5905	3080	1058
2	10298469	12419150	8368	5292	2248
2	217715661	218395480	2420	1375	496
2	105125034	106210058	3222	1872	738
2	102688765	103588215	2718	1229	439
2	184357608	185280173	3257	1412	424
2	191973357	195861164	7467	4056	1564
2	205799241	206735704	2453	1898	747
2	201576284	202818637	2914	1562	628
2	103588215	105125034	3177	1586	649
2	62429044	64625913	4973	3300	1046
2	78079264	80050403	6978	3918	1318
2	101822329	102688765	2338	1263	478
2	21050490	23341383	5427	3228	1165
2	196447456	198078110	4060	1975	713
2	98995201	101822329	7073	3583	1219
2	35345028	36122006	3724	2017	508
2	43309590	44313803	3496	2374	738
2	38132712	39031337	2923	2164	672
2	52491133	53508452	4365	2721	701
2	50818928	52491133	5275	3691	1063
2	54685226	56203345	5449	3437	1003
2	53508452	54685226	4119	2624	805
2	44313803	46482634	7520	5766	2126
2	40281483	43309590	11198	7721	2320
2	50022257	50818928	2701	1780	478
2	36122006	38132712	7581	5068	1694
2	238760981	239952643	4541	2742	1082
2	81620841	85140680	10942	3621	1192
2	202818637	205799241	6579	3860	1446
2	231843389	233550003	5045	3154	1218
2	225840004	228119842	6777	3216	1249
2	144519484	146445570	3615	2006	829
2	150210292	151731462	4124	2052	815
2	157560635	158533218	1823	1000	410
2	237449032	238760981	4797	2846	1040
2	129474441	130067170	1981	869	345
2	121303783	123302906	5261	2846	1142
2	141805351	142518602	3288	1724	533
2	130067170	130658085	1693	820	329
2	181312739	182266031	2927	1444	478
2	39031337	40281483	2956	1920	613
2	241560084	242149921	2193	1371	560
2	154005056	155391135	4839	2704	866
2	95326452	98995201	5344	2929	1012
2	239952643	241560084	6660	4170	1748
2	46482634	47318772	3132	2226	789
2	167355970	169968236	7919	4351	1541
2	140100271	141805351	6409	2930	998
2	164466638	165178840	1382	799	290
2	118367466	121303783	8595	4373	1723
2	224859419	225840004	2970	1467	497
2	163503551	164466638	2357	1090	425
2	235150987	236043550	3914	2458	1081
2	173138905	175588929	7305	4447	1810
2	242149921	243188920	3284	2121	758
2	110572432	113921856	6798	3856	1552
2	113921856	116772470	7636	4409	1538
2	108429177	110572432	5454	2819	1047
2	229370787	231843389	7801	4306	1735
2	116772470	118367466	4854	2144	640
2	158533218	159577082	3372	1719	606
2	155391135	157560635	5659	2869	986
2	165178840	167160270	4897	2682	943
2	107408267	108429177	3216	1356	519
2	106210058	107408267	4390	2325	941
2	167160270	167355970	610	331	112
2	133042784	135158578	6233	4010	1507
2	130658085	133042784	6197	3441	1286
2	220454551	222521176	6549	3858	1435
2	147277162	150210292	6089	2999	1133
2	137042794	138698117	5797	2784	915
2	146445570	147277162	1610	891	339
2	138698117	140100271	4127	1615	665
2	88038507	89154526	2469	1295	561
2	152486782	154005056	4278	2322	784
2	178553183	181312739	8803	4688	1656
2	159577082	161769733	7314	3570	1231
2	123302906	124732250	5188	2085	717
2	125840921	127373764	5041	1729	593
2	209941529	212379518	7183	3688	1176
2	85140680	88038507	7423	4236	1625
2	135158578	137042794	3890	1739	592
2	228119842	229370787	5076	2493	985
2	127373764	128034347	2577	1349	542
2	175588929	177363636	4694	2575	969
2	171226245	173138905	5613	3425	1242
2	47318772	48213001	3021	2142	855
2	151731462	152486782	2422	1176	409
2	124732250	125840921	3480	1718	652
2	169968236	171226245	5036	2558	939
2	8422147	10298469	5853	3725	1477
2	206735704	208645399	5289	3177	1215
2	70755198	73174848	6966	4132	1553
2	185280173	189882065	11359	4964	1539
2	177363636	178553183	3354	1821	669
2	236043550	237449032	4153	2581	1005
2	233550003	235150987	5255	3255	1267
2	48213001	50022257	6220	4274	1274
2	12419150	14335308	6530	3245	1228
2	5708337	6836254	4376	2307	919
2	14335308	16329735	6305	3535	1319
2	161769733	163503551	3101	1422	583
2	142518602	144519484	5606	2925	1075
2	128034347	129474441	4315	2256	873
2	222521176	224859419	7130	3506	1458
3	159477890	161524504	5583	2256	785
3	72529329	74321817	5632	3741	1374
3	188856214	190226607	5518	3232	1211
3	74321817	75704949	4622	2529	778
3	190226607	192343814	8260	4116	1526
3	178107165	179374586	3690	1999	718
3	139954597	141339097	3640	2073	771
3	63669286	65273538	5130	3784	1319
3	181511166	183769683	5632	3202	1295
3	103084960	104581613	5711	2281	780
3	100592217	103084960	7343	3162	1069
3	110513770	112815699	7210	3283	1231
3	109522395	110513770	2987	1226	422
3	183769683	185068255	3892	2436	1059
3	99373762	100592217	2557	1327	448
3	106982811	109522395	7114	3546	1295
3	40221298	41064528	1540	850	342
3	56433907	58157519	5270	2722	914
3	35283458	36486842	3666	1966	673
3	42540002	45165153	5570	2959	1141
3	33255592	35283458	5766	3180	1033
3	54081390	55348860	4028	3012	1109
3	55348860	56433907	3211	1873	650
3	130244735	131836516	4625	2297	755
3	131836516	133252173	4719	2112	754
3	41064528	42540002	4629	2404	804
3	179374586	181511166	4534	2643	989
3	157312028	159477890	6177	2543	873
3	121974097	123517768	4343	2215	904
3	113947863	115447080	3144	1839	785
3	126214943	128194861	5417	2770	1019
3	118530251	120523055	6133	2829	1070
3	124936642	126214943	5443	2636	869
3	115447080	116800153	4208	2417	842
3	112815699	113947863	3226	1632	639
3	116800153	118530251	5515	3097	1038
3	120523055	121974097	4559	1595	553
3	128194861	130244735	5533	2880	1048
3	38356116	40221298	5575	2705	1019
3	170964909	172295731	4173	2596	1066
3	167117429	168580960	3416	1671	633
3	45165153	46657500	5271	2505	864
3	70449028	72529329	5438	4145	1658
3	49316972	51832015	3882	1765	621
3	173477285	175116539	5459	3505	1158
3	32351715	33255592	3362	1878	742
3	175116539	176320287	4045	1916	699
3	104581613	106982811	7603	3703	1400
3	47727212	49316972	2043	1069	416
3	46657500	47727212	1710	923	345
3	123517768	124936642	4475	2617	1006
3	29142260	30717955	6192	3722	1427
3	36486842	38356116	4627	2538	979
3	135456906	137371083	4126	2085	646
3	95311971	98215950	8018	3300	1007
3	185068255	186890344	5437	3570	1543
3	154714218	156008700	3471	1730	663
3	153256571	154714218	4320	1772	638
3	30717955	32351715	5151	3159	1207
3	151348730	153256571	5806	2979	1082
3	133252173	135456906	5966	3638	1389
3	156008700	157312028	3659	1626	596
3	176320287	178107165	5538	3017	1193
3	195971408	197075987	3701	2349	962
3	51832015	54081390	4689	2815	1020
3	161524504	163253205	8022	2470	750
3	82643886	84367479	4557	2004	614
3	172295731	173477285	3303	2064	790
3	94255316	95311971	3393	1323	370
3	60272906	62355666	7307	4887	1836
3	62355666	63669286	4912	2985	1156
3	88298373	94255316	6678	3073	948
3	141339097	143164628	5517	2917	1161
3	81427310	82643886	2966	1356	465
3	77508835	79024541	3717	1952	680
3	17891118	19125144	3212	1653	632
3	6083183	7083387	4182	2758	1011
3	27840910	29142260	3558	2327	789
3	23804865	25461558	5896	4035	1358
3	8648561	9543183	3100	2273	981
3	146726629	149043237	7114	3568	1441
3	149043237	150252004	3751	2130	891
3	14816900	16282442	4323	2440	936
3	20091348	21643707	6475	3764	1233
3	2992120	4431647	6327	4248	1582
3	60157	1441779	5464	3987	1510
3	26877769	27840910	3245	1702	538
3	85582231	87409732	5416	2107	672
3	68286914	69276762	3001	1963	616
3	69276762	70449028	3536	2201	749
3	98215950	99373762	4072	1739	604
3	1441779	2992120	8174	5776	2103
3	65273538	66270447	3139	2281	877
3	137371083	139954597	6240	3296	1232
3	145664619	146726629	3742	1656	586
3	7083387	8648561	6163	3905	1299
3	11019665	13070799	6600	3917	1528
3	25461558	26877769	4044	2266	808
3	9543183	11019665	4730	3121	1278
3	16282442	17891118	4977	2408	843
3	144410816	145664619	4688	1876	639
3	4431647	6083183	6740	5107	1992
3	84367479	85582231	3898	1470	438
3	143164628	144410816	3523	1678	656
3	13070799	14816900	5787	3744	1497
3	165055469	167117429	6963	2518	820
3	22204244	23804865	5702	3418	1039
3	87409732	88298373	2619	1075	355
3	66270447	68286914	6835	4157	1375
3	75704949	77508835	5549	3253	1096
3	163253205	165055469	5537	1942	609
3	79024541	81427310	6457	2516	829
3	150252004	151348730	3011	1874	695
3	168580960	170964909	6400	3585	1370
3	194059671	194786674	3713	2331	979
3	194786674	195971408	5058	3615	1468
3	186890344	188856214	5896	3644	1591
3	192343814	194059671	5835	3458	1412
3	197075987	197946622	2703	1716	738
3	58157519	60272906	7447	4438	1614
3	19125144	20091348	1973	1183	448
3	21643707	22204244	3314	2067	727
4	40202609	42213058	6612	4026	1671
4	71049152	72140558	3651	1334	508
4	6773043	7539692	3556	2732	1136
4	68059497	68854765	2554	1062	424
4	37255047	38907022	6490	3858	1536
4	47411896	48123600	2098	975	368
4	107501305	108815348	3513	1617	659
4	68854765	71049152	9305	3558	1141
4	66600492	68059497	4654	1986	696
4	3846040	4684116	4563	3075	1133
4	72140558	74592390	5949	2462	910
4	14272001	15147446	3515	1960	698
4	111256567	113870102	6935	3643	1301
4	94233299	96182188	5980	3260	1063
4	86930609	87534648	1731	605	231
4	80990297	82125315	2576	1234	471
4	84799656	86930609	5757	2482	906
4	83372593	84799656	4476	2310	901
4	79093979	80990297	5503	2319	832
4	82125315	83372593	3879	2043	737
4	87534648	89238028	5563	2732	1009
4	189693511	191043594	6346	3710	1506
4	43965045	45189157	4468	1613	580
4	4684116	5502388	3720	2303	869
4	694715	1478711	3100	1776	635
4	119933512	120392684	2130	890	272
4	126480886	127275477	2896	1501	531
4	124286481	125210862	2930	1344	529
4	42213058	43965045	6651	2716	944
4	38907022	40202609	4403	2327	901
4	125210862	126480886	4347	2056	785
4	35151415	36020436	3894	1429	509
4	118479918	119933512	4792	1980	653
4	127275477	127830293	2065	1150	360
4	7539692	8152235	2999	2295	955
4	62371763	64341001	6654	2896	1008
4	56547644	58935008	8875	4764	1821
4	64341001	66600492	8001	3177	1053
4	115666246	117276929	4765	1738	576
4	164478234	165823448	5172	2814	979
4	53877433	55429556	4611	2400	877
4	120392684	122657987	8348	3508	1274
4	122657987	124286481	4350	1891	648
4	97540703	99424067	5131	1938	604
4	96182188	97540703	4587	2281	802
4	10699152	12323034	6379	3730	1231
4	55429556	56547644	3986	1893	725
4	103221356	105305294	5160	2502	811
4	45189157	47411896	5095	2419	907
4	36020436	37255047	4796	1999	679
4	12323034	14272001	7005	3831	1319
4	33172766	35151415	5410	1804	641
4	100678360	103221356	7778	3828	1301
4	2842979	3846040	3682	2670	1041
4	163243679	164478234	3972	1840	698
4	10240	694715	1911	1025	385
4	5502388	6773043	5542	4209	1777
4	99424067	100678360	4531	1826	714
4	105305294	107501305	5727	2667	973
4	127830293	128996665	1862	1124	353
4	108815348	111256567	7193	3670	1454
4	30454535	31782981	4721	2329	832
4	128996665	130591885	4138	2283	875
4	60741087	62371763	6228	2449	902
4	27343722	27965868	2463	1210	447
4	20544557	22319347	6115	3202	1138
4	48123600	53877433	6373	3687	1620
4	167852917	169676825	6244	3211	1145
4	24135529	25609322	4710	2898	1215
4	29762208	30454535	2704	1166	460
4	31782981	33172766	5513	2258	754
4	90231564	91560677	3598	1588	603
4	134628434	136566407	5749	2482	808
4	131283821	132954033	5663	2607	851
4	143443265	146178187	6695	2884	936
4	138541971	139556511	3181	1765	625
4	155056126	157485097	7966	4115	1506
4	130591885	131283821	2110	1022	345
4	77130707	79093979	6442	3040	1146
4	148521873	150683580	4869	2604	976
4	141084631	143443265	6681	3239	1236
4	25609322	27343722	4340	2947	1229
4	8152235	9326479	4724	3068	1253
4	74592390	77130707	7943	3292	1221
4	27965868	29762208	6757	3033	991
4	89238028	90231564	2980	1572	619
4	22319347	24135529	5235	3049	1144
4	150683580	152782184	5098	2314	816
4	136566407	138541971	6960	3097	1164
4	165823448	167018858	4236	2248	838
4	15147446	15927009	2452	1258	452
4	18841874	20544557	6043	2470	871
4	15927009	17383322	4794	3090	1181
4	146178187	148521873	6066	3047	1183
4	167018858	167852917	3356	1319	443
4	180122043	182066807	8562	5119	1928
4	184929455	186909090	7998	5520	2244
4	152782184	154477641	4961	2789	1130
4	161826435	163243679	6279	2646	924
4	170776510	172558635	6266	2563	831
4	178991910	180122043	4180	2082	752
4	174264132	176570716	7133	3876	1578
4	186909090	188472981	6272	4112	1663
4	188472981	189693511	6303	3907	1586
4	183371275	184929455	6459	4208	1810
4	132954033	134628434	5737	2046	708
4	139556511	141084631	4040	2588	1087
4	157485097	158743718	3968	1827	642
4	91560677	94233299	7173	3552	1200
4	176570716	178991910	8216	4554	1764
4	117276929	118479918	4161	1765	582
4	113870102	115666246	5723	2947	1069
4	158743718	161058864	6326	3025	999
4	169676825	170776510	2809	1533	578
4	161058864	161826435	3075	1724	563
4	58935008	60741087	6933	2828	925
4	172558635	174264132	3856	2009	744
4	182066807	183371275	5499	3964	1602
4	1478711	2842979	4182	2774	1033
4	9326479	10699152	6319	3312	906
4	154477641	155056126	1912	1098	428
4	17383322	18841874	4223	2123	766
5	56621102	57340073	2290	1057	459
5	53703044	55417349	5482	2709	1010
5	175450595	177251507	4322	2499	1062
5	40287729	41888710	5138	2047	726
5	36433954	38802410	6230	3469	1340
5	38802410	40287729	4715	2184	749
5	41888710	43983499	5358	2251	713
5	50163398	52134622	5501	2655	870
5	117346213	118608820	4321	2518	849
5	43983499	50163398	8019	3248	936
5	27984513	29714820	6334	2548	894
5	85767290	87389991	3252	1704	596
5	55417349	56621102	3876	2204	959
5	73759326	75798866	5711	3170	1144
5	172678327	173642871	3388	2052	880
5	91840542	93809984	3104	1653	697
5	129519025	132139649	5313	2376	732
5	132139649	134777401	6357	4058	1678
5	142981248	144943354	5554	2583	839
5	134777401	136376050	4293	2173	783
5	125785649	127344604	4180	2229	851
5	144943354	147181998	5911	3025	1191
5	127344604	129519025	6840	2785	910
5	136376050	139265072	5350	2999	1146
5	171074292	172678327	4920	3151	1374
5	71240456	73759326	7047	3769	1438
5	11940	982252	4163	2589	970
5	139265072	140645971	2615	1353	503
5	169505664	171074292	4707	2844	1246
5	95963519	97315601	5442	1884	665
5	93809984	95963519	5099	3126	1210
5	118608820	119669042	3468	1985	619
5	2132442	3361941	5987	3767	1607
5	168525318	169505664	3273	1847	753
5	79393144	80481471	3850	2304	845
5	67850860	71240456	4570	2562	993
5	173642871	175450595	5986	4148	1834
5	65911286	67850860	5835	3464	1306
5	4632110	5973233	4937	2872	1229
5	57340073	58524622	4314	2283	809
5	63218987	63968304	1463	772	254
5	101578769	103320005	4479	2286	770
5	5973233	7143218	4550	2491	1030
5	97315601	99260992	6307	2768	873
5	119669042	120452166	2715	1384	411
5	61672995	63218987	4817	2166	711
5	166847740	168525318	4731	3458	1413
5	120452166	122556905	7146	3731	1243
5	140645971	142981248	6781	4175	1733
5	26184851	26857604	2452	1038	390
5	60935907	61672995	1712	895	345
5	99260992	101578769	6922	2946	872
5	982252	2132442	5409	3831	1602
5	26857604	27984513	3219	1559	568
5	33500180	35048970	5376	2713	1064
5	29714820	31390249	5925	2748	1020
5	13464832	14757804	3895	2291	865
5	87389991	88891530	2351	1221	491
5	11173271	13464832	6014	3507	1097
5	9718832	11173271	5023	3235	1268
5	14757804	16963613	5711	3594	1406
5	147181998	148662624	4366	2122	810
5	8446336	9718832	4799	2529	984
5	104851483	105893055	2522	1478	453
5	107264196	108633934	4451	2367	680
5	31390249	33500180	7131	4187	1803
5	114830370	115831047	3983	2186	682
5	150561298	152867774	7300	3438	1198
5	161482133	162743908	3643	1981	710
5	177251507	178413464	5232	3335	1341
5	18051592	19917716	6618	3029	979
5	3361941	4632110	4521	2442	1014
5	23494324	26184851	9233	3995	1420
5	162743908	163771582	3343	1986	712
5	156628700	158825698	6709	3379	1261
5	16963613	18051592	3078	1820	797
5	159973944	161482133	4591	2020	760
5	19917716	22152073	6142	2873	1046
5	35048970	36433954	4163	1961	732
5	110821144	111981562	3739	2174	697
5	111981562	113396285	5364	2924	880
5	153773088	155373505	4867	2555	993
5	22152073	23494324	4013	1834	647
5	88891530	90422654	3269	1856	695
5	123798100	125785649	7258	4531	1568
5	158825698	159973944	3617	2138	891
5	63968304	65911286	5006	2359	902
5	90422654	91840542	2970	1493	555
5	155373505	156628700	3401	1886	648
5	108633934	110821144	6593	3480	1152
5	75798866	77623332	5739	3340	1292
5	83972689	85767290	7603	3089	967
5	180559933	180885156	705	463	184
5	105893055	107264196	4725	3012	1019
5	58524622	60935907	5865	3014	1011
5	122556905	123798100	3724	2255	743
5	7143218	8446336	5103	2678	968
5	179401244	180559933	4770	2923	1214
5	80481471	82025648	3837	2428	848
5	77623332	79393144	5010	2968	1151
5	82025648	83972689	4554	2757	1115
5	178413464	179401244	3445	2393	1030
5	152867774	153773088	3062	1418	535
5	113396285	114830370	4869	2801	832
5	103320005	104851483	4709	2500	758
5	148662624	150561298	5551	3322	1356
5	115831047	117346213	5596	3393	1252
5	52134622	53703044	5473	2672	993
5	163771582	165642395	5220	3521	1223
5	165642395	166847740	3313	2380	882
6	103983395	106056733	6298	3132	1120
6	107450306	108464380	2537	1509	608
6	164383521	165586864	4947	2532	932
6	162931203	164383521	5226	2968	1075
6	165586864	167024733	5754	3654	1416
6	158218719	160580497	8827	4389	1683
6	162169564	162931203	2964	1974	686
6	117672972	118963115	3585	1564	555
6	119963278	120512128	1897	771	253
6	129861031	130935454	4063	2110	818
6	123856181	125424383	4646	2983	1140
6	127540461	129861031	5753	2728	1051
6	120512128	121905676	4665	2013	615
6	48391125	50386145	5868	2146	706
6	118963115	119963278	3145	1411	485
6	50386145	52210476	5926	2590	917
6	81929222	83127149	3532	1639	569
6	68849483	69523448	2856	1116	420
6	9020026	10540317	5342	2977	1213
6	10540317	11790816	3971	2346	938
6	26791233	28017819	3428	1585	466
6	40345115	42038721	5314	3207	1324
6	11790816	13209388	4164	2448	960
6	43756169	45406563	5149	3038	1160
6	42038721	43756169	4530	2576	1081
6	33236497	35455756	6847	3867	1446
6	121905676	123856181	5890	2671	967
6	28017819	28917608	2931	1092	335
6	21684065	22748307	4067	2540	972
6	32682664	33236497	6276	2641	718
6	75462003	77414881	4694	2137	792
6	83127149	85209989	4895	2238	811
6	45406563	47311898	5209	2795	1156
6	85209989	87069500	6144	2299	755
6	28917608	29737971	3604	1430	404
6	17386405	19207487	6885	3243	1123
6	22748307	23936619	4477	2769	973
6	39295677	40345115	3261	1643	609
6	30798168	31571218	12156	5564	1254
6	24852275	25684587	3439	1918	702
6	89973052	91843196	5191	3113	1251
6	73450097	75462003	7326	3061	1102
6	14802924	17386405	7903	4934	1935
6	29737971	30798168	10539	3868	842
6	77414881	78957728	5544	2191	648
6	78957728	80691170	6103	2547	895
6	37572596	39295677	5738	3186	1251
6	87069500	88822140	5694	2474	857
6	35455756	37572596	6074	3882	1545
6	25684587	26791233	3603	1649	531
6	31571218	32682664	18292	12833	2621
6	71609510	73450097	6394	2754	956
6	80691170	81929222	5197	1741	486
6	100630146	102636772	5369	2530	898
6	7808936	9020026	4584	2401	868
6	169382050	170330173	3425	1826	664
6	61880512	63552888	6413	1913	476
6	168042835	169382050	6557	3825	1508
6	57599465	61880512	4235	1463	382
6	65765742	67329215	6576	2637	834
6	47311898	48391125	3258	1390	491
6	52210476	53279102	3668	1935	779
6	55468270	56105313	2421	894	312
6	13209388	14802924	4673	2902	1091
6	69523448	71609510	6634	3039	1044
6	88822140	89973052	3640	1836	717
6	102636772	103983395	4839	1845	561
6	150253404	151912703	6839	4207	1695
6	53279102	55468270	7865	3477	1221
6	154974120	156763326	5839	3829	1529
6	153094496	154974120	7317	3535	1375
6	63552888	65765742	6286	2485	809
6	56105313	57599465	4222	2119	902
6	23936619	24852275	3507	2100	788
6	19207487	21684065	8345	5085	1905
6	170330173	171051270	2586	1643	666
6	112345014	114220833	4723	2334	937
6	110304247	112345014	5828	2773	1041
6	108464380	110304247	4594	2120	805
6	156763326	158218719	3914	2460	1053
6	4617817	5791472	4197	2620	1064
6	116131396	117672972	4286	1938	701
6	5791472	6785207	4101	2596	1053
6	97093511	97842284	2220	920	340
6	130935454	132765669	5330	2798	1040
6	125424383	127540461	3949	2101	778
6	132765669	134244243	4389	2270	828
6	73924	1452362	5210	3493	1648
6	6785207	7808936	4141	2672	1063
6	139845436	142288479	5556	2620	875
6	134244243	136224177	5050	2980	1194
6	3573593	4617817	4186	2450	906
6	91843196	93428644	4475	2300	858
6	136224177	137614218	2472	1589	672
6	67329215	68849483	6925	2497	833
6	145319810	146665424	3204	1270	415
6	97842284	100630146	7260	3532	1347
6	138822629	139845436	3515	2049	846
6	1452362	2458936	2899	1823	810
6	137614218	138822629	4063	2139	906
6	2458936	3573593	4495	2794	1129
6	94441175	97093511	7614	3095	1148
6	94118142	94441175	749	311	112
6	114220833	116131396	5870	2412	826
6	93428644	94118142	2664	1192	495
6	142288479	145319810	7231	4094	1572
6	167024733	168042835	4103	2557	958
6	160580497	162169564	5754	3351	1236
6	148920352	150253404	4150	2277	841
6	106056733	107450306	4999	2832	1188
6	146665424	148920352	6811	4269	1605
6	151912703	153094496	4033	2155	869
7	105682905	107780178	5836	3667	1358
7	1353067	2062398	2650	1852	630
7	79888069	82022686	6091	3502	1339
7	2772227	4573428	8050	5814	1952
7	5854526	6573857	2823	1900	735
7	39862670	42001811	4790	2704	1074
7	38966703	39862670	2613	1350	503
7	96073508	97099570	2892	1488	571
7	37555184	38966703	5577	2891	1061
7	92493752	93966601	3495	1871	785
7	33555768	36213538	8457	4367	1610
7	19481547	20124908	3160	1656	528
7	31137289	33555768	8753	4649	1555
7	90661784	92493752	3536	1948	745
7	36213538	37555184	4436	2867	1173
7	4573428	5416232	3747	2761	1038
7	6573857	7808752	5770	3762	1317
7	11299198	12635461	6590	3892	1153
7	104159525	105682905	4182	2705	1080
7	12635461	13884202	5728	3746	1197
7	9123423	9987499	4417	2703	894
7	20124908	22507629	8940	6324	2291
7	101199253	103197510	5223	2886	1114
7	141226557	142656310	3786	1886	764
7	138744679	139933177	2941	1755	754
7	132805848	134307596	3801	1887	587
7	126519170	126869221	893	473	173
7	147815318	149840658	6725	4442	1726
7	126869221	128778386	5536	2738	982
7	154964730	156065250	4809	3219	1472
7	103197510	104159525	3894	2166	714
7	149840658	150711505	3371	1658	622
7	124167552	126519170	7473	3174	936
7	124156805	124167552	41	28	13
7	130422414	132805848	6706	4428	1840
7	140235210	141226557	2037	1111	451
7	22507629	23471442	2972	1807	632
7	134307596	135591083	3954	2111	805
7	153674019	154964730	5021	3426	1395
7	121933630	124156805	6424	2858	995
7	25077259	25909555	2998	1759	697
7	7808752	9123423	5683	4114	1524
7	146427960	147815318	5496	3018	956
7	150711505	152249806	3971	2976	1370
7	135591083	136876562	4093	2159	791
7	97099570	98715474	5331	2762	1036
7	23471442	25077259	5828	3334	1124
7	28360309	31137289	8950	5791	2331
7	93966601	96073508	4887	2777	986
7	100196651	101199253	3671	2131	862
7	128778386	130422414	4595	2625	1047
7	85572182	87825004	5917	2406	837
7	98715474	100196651	2803	1459	571
7	139933177	140235210	1323	800	373
7	25909555	28360309	7016	3912	1448
7	157634597	159128575	6211	3798	1482
7	144968289	146427960	4727	2151	705
7	9987499	11299198	5559	3162	943
7	142656310	144968289	5477	2731	1117
7	136876562	138744679	5296	3755	1485
7	152249806	153674019	6109	3712	1542
7	71874885	73334602	2785	1639	682
7	121045273	121933630	2660	1219	472
7	53176312	54222976	4815	1867	612
7	73334602	76458564	6629	4146	1735
7	113712387	116780178	6464	3175	1242
7	45952922	46986720	3628	1649	599
7	51675322	53176312	7161	3020	1047
7	49212278	51675322	7805	3658	1355
7	46986720	49212278	8181	3924	1520
7	116780178	118351581	3671	1619	536
7	42001811	43159074	3711	1731	694
7	76458564	78093859	5885	3408	1195
7	109647594	112618684	7173	4500	1507
7	107780178	109647594	5579	2869	950
7	63641125	65689809	6955	2951	890
7	54222976	55691584	5567	2560	894
7	44763828	45952922	3903	2122	840
7	69085364	71874885	8175	4528	1708
7	78093859	79888069	5685	2868	1069
7	112618684	113712387	2819	1333	469
7	63307359	63641125	1231	445	154
7	87825004	90661784	9598	4318	1365
7	57382638	63307359	7253	4101	1212
7	68234074	69085364	3091	1610	648
7	65689809	68234074	11139	5061	1762
7	5416232	5854526	1712	1187	479
7	15143657	16902069	6328	4284	1411
7	16902069	19481547	7640	5601	2094
7	972752	1353067	1897	1272	460
7	156065250	157634597	6463	3844	1509
7	43159074	44763828	4555	2429	896
7	83801203	85572182	4458	1943	632
7	82022686	83801203	6125	3148	1121
7	55691584	57382638	6632	3053	1037
7	118351581	121045273	5551	2307	785
7	2062398	2772227	2755	1960	712
7	16161	972752	4753	3516	1531
7	13884202	15143657	4572	3306	1195
8	109248173	110484314	3610	1351	488
8	87411709	89085481	4999	2547	828
8	40703337	41721454	3520	1997	759
8	144236881	146303867	4797	3318	1317
8	59068651	59728100	2209	1082	407
8	54418044	55945581	3958	1894	706
8	55945581	56956383	3128	1466	568
8	56956383	59068651	6956	3062	1145
8	59728100	62329099	6945	3557	1289
8	79132861	81956395	7448	3771	1459
8	84225589	85955619	5538	1978	682
8	81956395	82693739	2048	977	401
8	76456542	79132861	8123	3057	1066
8	72289454	73817199	5179	2700	1056
8	53302930	54418044	3790	1719	566
8	108648177	109248173	1777	755	293
8	62329099	63349306	3306	1347	479
8	75445064	76456542	3310	1443	559
8	140725643	143044914	6745	4656	1851
8	73817199	75445064	4812	2563	1075
8	137524151	139254830	6765	3320	1140
8	85955619	87411709	2602	1186	433
8	31548360	32977218	3788	2121	753
8	65232872	66489090	3053	1458	596
8	26682525	28162392	5680	2818	1080
8	66489090	69863057	8529	4239	1650
8	10422	1044217	4448	3427	1187
8	70867979	72289454	3791	1816	658
8	25483454	26682525	4750	2762	1119
8	99401581	101620958	4185	2113	767
8	139254830	140725643	4903	3228	1223
8	29327896	31133729	4949	2815	1139
8	107410754	108648177	3597	1679	611
8	31133729	31548360	1548	756	275
8	32977218	35317232	6508	2393	884
8	121201700	124861459	10361	5736	2318
8	113064320	116096495	9394	3372	1060
8	128659111	130381139	5366	2926	1117
8	1163245	2042942	4846	3830	1542
8	116096495	119685457	7956	4518	1775
8	28162392	29327896	2775	1696	683
8	143044914	144236881	4774	2787	1000
8	130381139	131639625	4058	2227	763
8	95005527	96534806	5447	2877	1068
8	69863057	70867979	3177	1850	765
8	38938806	40703337	6231	2940	1044
8	124861459	125683719	2470	1435	547
8	3392926	3783017	3523	2592	818
8	104988752	107410754	6767	3467	1226
8	119685457	121201700	4942	2232	763
8	136035605	137524151	4493	2382	805
8	35317232	37379389	2868	1587	663
8	101620958	104123306	7734	4673	1908
8	96534806	99401581	8126	4890	1914
8	133351144	134570001	4014	2589	1039
8	41721454	42773823	2161	1200	460
8	42773823	46841315	1948	1138	443
8	2573279	3392926	5903	4107	1406
8	46841315	50082470	5770	2859	919
8	131639625	133351144	6107	3038	1141
8	50082470	53302930	10086	3696	1293
8	125683719	126410917	2382	1303	532
8	63349306	65232872	5045	2273	750
8	90638162	93554386	6392	3041	1047
8	126410917	128659111	7480	4459	1807
8	93554386	95005527	3047	1705	664
8	104123306	104988752	3175	1102	376
8	7153079	9154694	5828	4177	1584
8	20060856	21661737	5937	3998	1409
8	11278998	13491775	9564	6702	2371
8	5146927	6142797	7545	5091	1577
8	21661737	22897057	3564	2628	1030
8	10463197	11278998	3094	2322	702
8	6142797	7153079	5503	3926	1516
8	13944992	15991660	11149	7386	2152
8	3783017	4480476	5508	4322	1499
8	19492840	20060856	2283	1624	596
8	24674718	25483454	2583	1389	526
8	82693739	84225589	5144	1901	691
8	110484314	111850847	3022	1231	506
8	1044217	1163245	940	649	229
8	13491775	13944992	3716	2249	583
8	9154694	9640787	2040	1322	388
8	134570001	136035605	5688	3255	1235
8	89085481	90638162	4632	2071	626
8	4480476	5146927	4435	3161	1014
8	17387876	17836399	2667	1739	559
8	9640787	10463197	3614	2823	863
8	22897057	24674718	5810	3382	1279
8	15991660	17387876	5618	4039	1391
8	17836399	19492840	7759	5479	1909
8	111850847	113064320	2671	1044	344
8	2042942	2573279	3668	2658	1008
8	37379389	38938806	2939	1905	890
9	4884926	6557589	4888	3452	1110
9	76973081	78900183	6269	3950	1597
9	26111757	28224283	7442	5008	1747
9	88109333	88590417	1224	550	235
9	84211233	85440801	2695	1755	707
9	86938196	88109333	3851	1896	709
9	90136246	92528698	8005	4382	1673
9	85440801	86938196	4545	2818	1034
9	92528698	94167203	5256	2879	1122
9	88590417	90136246	4681	2700	1060
9	4495328	4884926	1719	1199	497
9	130055510	132165470	4593	2803	1173
9	72512711	72753755	708	371	143
9	10879253	12276489	6145	3600	868
9	72753755	74253040	4610	2378	861
9	74253040	76203946	5324	2667	1015
9	12276489	14836363	9291	6736	2519
9	8456299	9166403	2734	2061	769
9	14836363	16659655	6211	4430	1490
9	9166403	10879253	7708	5335	1765
9	121321537	122260297	2319	1416	532
9	76203946	76973081	1961	901	346
9	129059665	130055510	2386	1484	615
9	126971887	129059665	4254	2738	1007
9	6557589	7154923	2984	2012	653
9	7154923	8456299	6035	4340	1482
9	132165470	133223217	3510	2148	953
9	24158518	25330810	4138	2429	835
9	28224283	28811584	2121	1387	537
9	33578334	34642243	3228	1460	508
9	133223217	134127888	2923	2011	889
9	65472190	72512711	8170	5489	2545
9	36743283	38641599	5383	3301	1357
9	134127888	135298842	3254	2060	852
9	38641599	65472190	5833	4320	2122
9	115693145	117019801	4353	2721	1147
9	112778024	114831082	7524	4328	1629
9	109298754	110695062	4418	2765	1172
9	1079707	1916877	4071	2926	961
9	10023	1079707	5352	3980	1366
9	1916877	3190064	5441	4142	1534
9	124871322	126971887	5690	3393	1342
9	78900183	79471208	2177	1453	572
9	96671698	98922040	6393	3421	1239
9	28811584	30387392	6083	2759	824
9	105967976	107581749	5554	2569	836
9	30387392	31310383	3603	1573	445
9	94167203	96671698	8772	4107	1415
9	81079055	82590928	4168	2881	1107
9	104624437	105967976	6113	2892	950
9	82590928	84211233	6560	3455	1118
9	22206559	24158518	5790	4166	1464
9	32019368	33578334	5600	2899	1074
9	16659655	18661051	7980	5134	1599
9	20463534	22206559	5256	3520	1131
9	122260297	124871322	6045	3644	1340
9	137041122	137589364	1821	1345	611
9	138938978	139500342	1941	1376	559
9	137589364	138938978	5473	4080	1809
9	135298842	137041122	6715	4497	1816
9	139500342	141144796	4274	3160	1345
9	114831082	115693145	2547	1258	448
9	98922040	101592859	6931	3957	1480
9	31310383	32019368	2818	1054	351
9	3190064	4495328	4543	3597	1385
9	117019801	117921960	2900	1905	721
9	107581749	109298754	5498	3063	1206
9	79471208	81079055	4844	2848	1016
9	34642243	36743283	4891	2948	1153
9	18661051	20463534	6426	4636	1628
9	25330810	26111757	2645	1895	680
9	110695062	112778024	7620	4433	1522
9	101592859	104624437	7895	4117	1461
9	117921960	121321537	10402	5810	2114
10	131741327	132580245	3772	1902	750
10	48760450	50840915	4846	2708	1020
10	120591353	122407323	5846	3450	1385
10	116421406	119523934	8046	4521	1708
10	122407323	123231465	2922	1737	669
10	60289987	61891409	4339	2414	917
10	58959528	60289987	5217	1913	639
10	61891409	62659679	2547	1282	425
10	128001098	129154362	3325	2227	924
10	62659679	63341695	1451	644	258
10	63341695	65794114	7412	3468	1313
10	43894771	44730075	3412	1397	527
10	44730075	48760450	7871	4509	1900
10	42372579	43894771	6001	2895	948
10	123900545	125869346	6723	4319	1709
10	70195991	72220850	7536	4375	1834
10	123231465	123900545	2492	1568	650
10	106695048	108726686	5928	3181	1055
10	57662146	58959528	4951	1653	474
10	75422550	78706814	6611	3677	1348
10	73508512	75422550	3883	1835	702
10	67549615	69900148	8852	3727	1274
10	125869346	128001098	7036	4459	1699
10	72220850	73508512	4941	3322	1395
10	80876749	82414679	6710	3415	1214
10	104380410	106695048	5617	3259	1130
10	87937577	89127064	3561	1947	724
10	3352699	4572274	4468	2729	1106
10	29323236	29783692	2063	1212	521
10	91013381	92006581	3419	1767	597
10	18537267	19716878	5266	3000	930
10	15026068	16551767	5169	3459	1156
10	92006581	93335047	4004	1952	723
10	19716878	22772283	8963	5553	1793
10	89127064	91013381	5003	2844	1167
10	16551767	18537267	6740	4431	1633
10	50840915	53616629	6393	3659	1419
10	69900148	70195991	1171	541	208
10	132580245	134336329	8339	5358	2204
10	53616629	55103572	5616	3069	1083
10	134336329	134494673	297	202	81
10	2254500	3352699	5398	3300	1335
10	10249396	12586797	8386	5621	2231
10	1523544	2254500	3561	2076	864
10	22772283	23175132	1151	755	234
10	29783692	30458838	2574	1664	657
10	85458703	87937577	8738	3932	1470
10	30458838	31907519	4408	2488	918
10	13321600	15026068	6527	4744	1790
10	97822357	100241302	6367	3922	1577
10	7171484	8774665	6618	4306	1764
10	33707968	35109355	4002	2394	901
10	55103572	57031140	8111	4173	1310
10	4572274	5983762	6816	3923	1467
10	36572508	37790029	3656	1724	657
10	96221243	97822357	5187	2213	740
10	108726686	110317705	5732	3142	988
10	78706814	80876749	6238	3970	1583
10	37790029	42372579	6257	2187	600
10	129154362	130844284	7386	4524	1989
10	31907519	33707968	6280	2917	982
10	5983762	7171484	5441	3875	1676
10	130844284	131741327	3361	1977	802
10	26888684	29323236	9359	4636	1721
10	100241302	100668400	1220	624	212
10	134494673	135523865	4091	2593	1089
10	23175132	25578596	6252	3749	1407
10	115328432	116421406	3182	1906	754
10	84383745	85458703	4316	1689	561
10	8774665	10249396	5212	2874	1000
10	112561493	115328432	7464	4780	1833
10	12586797	13321600	3112	2312	968
10	57031140	57662146	1826	812	283
10	102949239	104380410	2732	1547	576
10	110317705	112561493	6043	3114	1100
10	119523934	120591353	3040	1872	797
10	65794114	67549615	5602	2389	816
10	100668400	102949239	6141	3291	1278
10	751339	1523544	3149	2105	814
10	35109355	36572508	3998	2018	768
10	60523	751339	1679	1155	417
10	82414679	84383745	6595	3109	1174
10	93335047	95396368	6006	3098	1134
10	95396368	96221243	1976	1128	412
10	25578596	26888684	6017	2597	892
11	86619301	87430235	3693	1615	546
11	124495528	126311320	5835	3461	1411
11	120766806	121175943	1181	689	258
11	117747110	119215476	3966	2375	882
11	122591910	123500117	3118	2065	908
11	121175943	122591910	3771	2354	959
11	119215476	120766806	4510	2967	1184
11	114830666	116383348	4221	2945	1169
11	116383348	117747110	4836	3075	1165
11	127316679	128188537	2952	1419	533
11	8333274	9087317	2357	1462	460
11	6322869	7436701	3867	2242	864
11	95726041	97057058	3821	2290	883
11	47006137	49866050	8858	3332	869
11	70855	1213590	4264	2902	1218
11	42310003	44693799	8206	4244	1607
11	114257728	114830666	1764	921	325
11	1213590	3665481	10161	6889	2811
11	109866116	111114397	3720	2000	710
11	7436701	8333274	4297	2618	1020
11	112459488	114257728	5350	3034	1204
11	111114397	112459488	2729	1451	583
11	3665481	4746709	4708	2938	961
11	123500117	124495528	3880	1691	579
11	4746709	6322869	8534	4393	1513
11	32276901	33958739	5167	2585	979
11	130342575	131074612	2605	1701	685
11	128188537	130342575	6106	4078	1718
11	133000046	134205993	3718	2522	1111
11	134205993	134946452	3906	2427	1004
11	84381272	86619301	6762	3754	1195
11	81266712	84381272	10279	5733	1795
11	62223771	63804569	3577	1936	789
11	80722373	81266712	2184	1324	486
11	28481593	30141357	4283	2179	754
11	13373124	15742552	5997	2862	1098
11	37116815	39382003	6171	2544	919
11	39382003	42310003	9263	4546	1587
11	90966490	92077144	3636	1667	548
11	54695473	55082657	1715	594	165
11	27020461	28481593	3153	1474	546
11	55082657	58457495	13215	4371	1175
11	87430235	89208936	5839	3113	971
11	17578402	19569535	6337	3586	1394
11	30141357	32276901	4299	2263	803
11	15742552	17578402	4550	2239	834
11	21017138	22374142	4339	2626	957
11	58780549	62223771	8767	4784	1854
11	89208936	90966490	5167	2489	761
11	49866050	54695473	7608	2295	509
11	33958739	35502605	5493	2702	1067
11	12564229	13373124	2713	1521	593
11	9087317	10952027	6034	3626	1178
11	70926292	72286017	4855	2119	782
11	22374142	24088517	6763	3147	1027
11	103959636	104873284	2593	1054	348
11	106520894	107844200	4616	2598	862
11	68005825	69516130	4017	2397	924
11	107844200	108437037	1147	612	200
11	74412351	76797209	6146	3453	1378
11	131074612	133000046	6264	4495	1845
11	100417169	101331121	3607	1753	633
11	104873284	106520894	4202	1893	645
11	97057058	98705065	6401	3391	1105
11	98705065	100417169	7111	4470	1422
11	65898631	68005825	4487	2607	969
11	101331121	103959636	9844	4834	1699
11	72286017	74412351	4960	2697	1023
11	76797209	78355058	3825	2109	674
11	19569535	21017138	5041	3499	1408
11	78355058	80722373	6955	5226	1941
11	93276157	94242260	2789	1357	443
11	94242260	95726041	4170	2362	976
11	92077144	93276157	3137	1642	578
11	26045753	27020461	3855	1618	617
11	44693799	47006137	5322	3113	1235
11	10952027	12564229	6541	4694	1914
11	35502605	37116815	4775	2932	1135
11	24088517	26045753	8610	4212	1360
11	63804569	65898631	4268	2625	1041
11	126311320	127316679	3318	1950	852
11	108437037	109866116	3146	2007	691
11	58457495	58780549	1015	332	118
11	69516130	70926292	4409	2883	1165
12	83502666	84303844	3086	1096	395
12	89682122	92066155	6006	2810	1058
12	40816185	41658586	3273	1394	463
12	81467767	83502666	6114	2685	991
12	84303844	85990426	4166	1697	569
12	115036602	115503216	1690	1101	501
12	72645075	73818454	3619	1651	540
12	69826542	70957987	4075	1980	660
12	59308666	61123729	4553	2035	680
12	70957987	72645075	4812	2432	938
12	67909729	69826542	5892	3669	1479
12	131786751	132807034	3701	2292	923
12	57548860	59308666	4374	2052	769
12	65559695	67181144	3909	2242	911
12	124977980	126445505	5542	3514	1482
12	67181144	67909729	2357	1096	458
12	73818454	76511314	7864	3882	1354
12	61123729	64032461	9617	4571	1593
12	115503216	117087471	5228	3551	1457
12	129237297	130377921	4889	3579	1501
12	5321472	6419753	3752	2285	944
12	113263518	113986709	1947	1139	461
12	132807034	133841511	3849	2463	962
12	126445505	127875098	5345	2883	1134
12	80448150	81467767	2990	1366	509
12	118135375	119754110	5607	3293	1371
12	64032461	65559695	3751	2144	875
12	6419753	8377536	6279	3956	1672
12	46024229	47714793	4156	2196	795
12	117087471	118135375	3081	2010	810
12	113986709	115036602	4152	2469	969
12	3677037	4417679	2492	1694	820
12	122007651	124977980	7997	4579	1730
12	130377921	131786751	6443	4451	1819
12	127875098	129237297	5432	3688	1632
12	101447641	101862690	1209	722	283
12	101862690	102964986	2894	1623	632
12	61107	1080331	3338	2405	1123
12	110336719	113263518	4287	2375	870
12	85990426	89682122	9715	3609	1226
12	119754110	122007651	6713	3758	1424
12	8377536	9031395	2433	1531	604
12	41658586	43984474	8141	3847	1308
12	102964986	104848696	6472	3379	1334
12	11754846	12733528	3342	2358	965
12	12733528	15241484	7805	5027	1952
12	27799773	29651255	6107	2972	1058
12	20863943	23820634	9400	5014	1819
12	55665837	57548860	3910	2076	886
12	51776494	53039004	4075	2363	936
12	49001866	51776494	6446	3223	1262
12	106958748	109025901	5994	3178	1189
12	37856717	39227169	4031	1734	419
12	25371083	27799773	8805	4512	1725
12	18087873	20863943	10263	5976	2114
12	43984474	46024229	4707	2085	788
12	32165592	33076989	4109	2126	772
12	10481534	11754846	4936	2278	787
12	9031395	10481534	5262	2968	1122
12	4417679	5321472	2882	1916	802
12	15241484	16310460	1966	1147	519
12	2544786	3677037	3824	2558	1127
12	29651255	30512406	4050	1990	706
12	54778823	55665837	2886	1213	499
12	76511314	78570570	6669	3511	1333
12	92066155	94514567	7691	4244	1741
12	94514567	96020785	6158	3512	1403
12	106436213	106958748	1398	904	377
12	1080331	2544786	5221	3027	1351
12	23820634	25371083	5257	3452	1352
12	33076989	37856717	5836	2217	538
12	99305987	101447641	5337	2952	1118
12	39227169	40816185	4513	2135	692
12	96020785	97108839	3818	2215	884
12	78570570	80448150	3915	2040	870
12	47714793	49001866	4814	2318	829
12	104848696	106436213	5326	3026	1147
12	30512406	32165592	6738	3646	1356
12	97108839	99305987	6723	3938	1509
12	16310460	18087873	4981	2874	980
12	53039004	54778823	4481	2659	1084
12	109025901	110336719	3707	2203	861
13	84133144	85610916	4739	2087	698
13	75670143	77410555	5970	3309	1164
13	85610916	88559882	10153	4139	1301
13	46495214	47431079	2670	1484	570
13	58410626	59302271	2512	1027	331
13	59302271	60854778	4836	2385	838
13	49383962	51591091	6040	3242	1245
13	71526791	73934089	7434	4440	1677
13	65200602	67844453	6717	3252	1225
13	61591949	63971559	8454	3460	1112
13	60854778	61591949	2688	1341	452
13	51591091	53339622	4001	2112	826
13	67844453	70724516	10420	4430	1468
13	41069263	43101027	5526	2741	1037
13	57554217	58410626	2189	900	292
13	63971559	65200602	4750	1632	542
13	44901409	46495214	3983	2314	949
13	20686720	22242174	5749	3507	1347
13	19020013	20686720	7360	3744	1256
13	55817131	57554217	4030	1556	514
13	53339622	54682864	3877	2022	722
13	22242174	23594702	5786	3605	1567
13	113572488	115109853	5117	3323	1340
13	30483267	32301815	6146	3517	1514
13	25784362	27284362	4524	2618	1024
13	32301815	33776903	4118	2096	854
13	29257551	30483267	4157	2068	847
13	73934089	75670143	5766	3275	1302
13	43101027	44901409	5052	2835	1133
13	47431079	49383962	6172	2990	1041
13	104844114	106247554	4931	2831	1174
13	104066710	104844114	2786	1474	556
13	80585676	82581814	6661	3244	1180
13	70724516	71526791	2954	1626	632
13	38878163	41069263	6681	3666	1481
13	54682864	55817131	3497	1459	554
13	112247592	113572488	4309	2954	1243
13	23594702	24531937	4341	2558	1003
13	33776903	35026464	3472	1753	712
13	109121210	109815112	2751	1496	625
13	106750000	108189877	4341	2799	1190
13	109815112	111232073	5876	3836	1610
13	111232073	112247592	3852	2349	951
13	93129691	93586455	1297	744	257
13	90521311	93129691	8564	4102	1540
13	36046367	37498185	4716	2597	1017
13	102300523	104066710	5726	3386	1313
13	35026464	36046367	2412	1260	495
13	108189877	109121210	3456	1976	860
13	88559882	90521311	6599	2398	825
13	37498185	38878163	4777	2217	773
13	27284362	29257551	6974	4146	1684
13	97519210	98938919	3664	2269	900
13	96087558	97519210	3299	1731	546
13	100574095	102300523	5482	3241	1205
13	98938919	100574095	5905	3571	1333
13	93586455	96087558	8679	5075	1986
13	24531937	25784362	5887	3444	1332
13	77410555	78808813	3939	1874	677
13	78808813	80585676	4676	2518	872
13	82581814	84133144	4684	1821	589
13	106247554	106750000	2040	1183	496
14	56216880	57481262	4355	2674	993
14	57481262	59448336	5619	3291	1209
14	43137389	44543227	5233	2593	771
14	35859593	38667725	7103	3783	1394
14	34846251	35859593	4138	1997	666
14	40341990	41615502	5475	1944	564
14	59448336	61680424	5615	2765	898
14	24905123	26135686	4624	2243	802
14	41615502	43137389	4711	2336	658
14	23018665	24905123	5810	3630	1677
14	65220298	66399555	3695	2077	748
14	63790015	65220298	3935	2008	699
14	29972145	32383265	6297	3495	1362
14	28466533	29972145	4059	2021	785
14	55233681	56216880	3082	1427	451
14	32383265	34846251	8314	6046	2589
14	61680424	63790015	6577	4137	1453
14	38667725	40341990	5034	2637	811
14	19002084	21589402	7241	5290	2466
14	103012102	105001723	6229	3666	1400
14	85746319	86647002	2941	1764	592
14	76444767	77229472	2742	1660	725
14	84241633	85746319	4909	2588	908
14	50507760	51493572	2912	1773	656
14	21589402	23018665	6003	3263	1291
14	51493572	53474383	6833	3965	1479
14	93132299	94325285	3738	1990	800
14	101534307	103012102	4658	2774	1201
14	53474383	53997831	1689	795	265
14	46081896	46749130	2237	964	269
14	71131957	72889615	5094	2855	1007
14	78561945	80186579	4007	2470	983
14	98341162	99138532	3368	1570	611
14	89497643	91296860	5503	3428	1456
14	83138097	84241633	3649	1743	684
14	48573586	49005471	1705	616	195
14	86647002	87635341	3236	1684	619
14	80186579	81579714	4199	2343	771
14	46749130	48573586	6281	3204	994
14	87635341	89497643	5571	2567	928
14	49005471	50507760	4311	2520	899
14	81579714	83138097	4405	2165	884
14	77229472	78561945	5159	2896	1149
14	99138532	101534307	7195	4647	1995
14	95750867	96262415	2306	1448	642
14	106340358	107289454	5123	3993	1053
14	72889615	76444767	9696	5667	2144
14	66399555	67992317	4457	1605	566
14	53997831	55233681	3158	1933	801
14	96262415	98341162	6536	3748	1627
14	26135686	28466533	6768	3700	1392
14	91296860	93132299	6098	3490	1448
14	94325285	95750867	5749	3444	1495
14	44543227	46081896	3832	1925	684
14	105001723	106340358	4091	2959	1191
14	67992317	71131957	9068	5079	1970
15	25108590	27298112	7538	4939	2115
15	31591821	32441811	2351	1442	560
15	40384132	41177514	1915	1174	431
15	32441811	34015425	5187	3445	1483
15	58441366	59694116	3939	2889	1022
15	55136269	56901773	6670	3463	1116
15	41177514	42776399	4093	2280	837
15	56901773	58441366	4425	3088	1018
15	50008043	51677560	5365	2639	884
15	46618787	48136048	4438	2246	770
15	100636847	101552694	3847	2534	1033
15	27298112	29338502	5016	2993	1266
15	96141596	98030910	5645	3771	1607
15	53069096	54508528	5128	2853	997
15	61265836	63215222	6126	4494	1715
15	37456502	38530777	3266	1988	674
15	93780902	94924330	5123	3308	1442
15	42776399	44198049	1995	1142	392
15	54508528	55136269	2708	1476	455
15	48136048	50008043	3822	1781	634
15	29338502	30165568	2474	1424	586
15	38530777	40384132	5914	3552	1329
15	35083251	37456502	6929	4035	1750
15	88369943	90475551	5913	4231	1629
15	86652905	88369943	6081	4150	1349
15	90475551	92164392	5846	4048	1419
15	59694116	61265836	4774	3328	1266
15	101552694	102520966	3281	2479	1074
15	24195127	25108590	6702	2853	730
15	99244059	100636847	5270	3392	1268
15	63215222	65104668	5166	2829	1009
15	71922649	73628714	3304	1867	677
15	76398624	78516053	5636	3030	1038
15	70133341	71922649	4904	3341	1381
15	84260468	86652905	7297	4740	1467
15	80860978	84260468	6853	4696	1759
15	65104668	67094767	5502	3342	1246
15	69017999	70133341	2413	1532	638
15	92164392	93780902	6086	4456	1732
15	20001200	21131604	1693	1403	894
15	67094767	69017999	5206	3105	1186
15	73628714	76398624	5628	3438	1340
15	44198049	46618787	5401	2808	1068
15	98030910	99244059	5192	3497	1382
15	78516053	80860978	8044	4968	1850
15	51677560	53069096	3445	2002	710
15	34015425	35083251	4204	2382	909
15	21131604	24195127	5603	4311	2250
15	30165568	31591821	3043	2018	859
15	94924330	96141596	3874	2644	1099
16	62229849	63691589	4111	2342	875
16	79134815	80297374	5366	3902	1366
16	53382572	55903774	8523	5256	2120
16	57664330	59045405	5398	3071	1216
16	60745694	62229849	3406	1718	634
16	55903774	57664330	5709	3418	1412
16	59045405	60745694	5369	2992	1030
16	83477208	84445883	5460	4302	1730
16	2764829	4001196	3387	2493	967
16	1207206	2764829	5056	3496	1330
16	4001196	5118345	3850	2818	1062
16	10426032	11520161	4487	3288	1205
16	9799419	10426032	2670	1677	558
16	60054	1207206	4475	3413	1401
16	72935150	74971503	6456	4912	1940
16	74971503	75977954	3294	2019	653
16	71054028	72935150	4036	2705	821
16	78456292	79134815	4170	3267	1255
16	14464002	16154060	3486	2436	973
16	65938566	68841363	5909	3411	1197
16	68841363	71054028	4647	3095	1074
16	11520161	12613098	4142	2879	1002
16	24136875	25986862	6382	3808	1614
16	27445755	29036613	2841	1916	816
16	75977954	77523678	6393	4065	1203
16	86815411	87647349	3452	2593	1002
16	86156599	86815411	3722	2926	1222
16	77523678	78456292	5551	3586	1274
16	31382943	46399473	4458	3128	1392
16	46399473	49007926	4040	2059	907
16	80297374	81772536	6652	4854	1741
16	13154437	14464002	4731	2902	1063
16	12613098	13154437	3300	1951	676
16	87647349	89041165	6743	5048	1934
16	8338519	9799419	7331	5062	1831
16	5118345	5891580	3975	3018	1032
16	7529121	8338519	4983	3198	1188
16	6893551	7529121	4262	2963	924
16	5891580	6893551	5489	4308	1629
16	20150571	22448904	4718	2768	1226
16	18643607	20150571	4683	2732	1056
16	82747728	83477208	4243	3214	1128
16	49007926	52035823	8112	4989	2134
16	52035823	53382572	3902	1939	771
16	81772536	82747728	4814	3454	1330
16	89041165	90292812	4665	3252	1125
16	84445883	85148685	4073	3111	1223
16	22448904	24136875	4723	2767	1240
16	85148685	86156599	4158	3536	1606
16	16154060	17644749	3859	2717	1157
16	63691589	65938566	6953	3797	1360
16	25986862	27445755	5341	3454	1470
16	29036613	31382943	3764	2537	957
16	17644749	18643607	2350	1561	605
17	41772087	43056905	3160	1857	696
17	36809344	38877404	4463	2642	1072
17	21290357	27334244	6703	3945	1596
17	51826118	53599432	5169	2837	1111
17	50719055	51826118	3380	1553	523
17	38877404	39899810	3700	1694	633
17	39899810	41772087	3916	2244	884
17	53599432	55357541	4854	2663	1161
17	27334244	29786491	4622	2441	862
17	57487512	59312755	2641	1471	602
17	15019097	16412342	3788	2309	869
17	8306425	9965921	5513	3806	1659
17	18856320	21290357	4796	2930	1146
17	16412342	18856320	6212	3795	1381
17	76263413	77298636	4367	3274	1412
17	67858770	69387817	4969	2851	1056
17	13180372	13894637	3082	1870	844
17	77298636	78837588	5705	3958	1663
17	59312755	61545589	4747	2999	1172
17	61545589	63148128	3049	1838	759
17	29786491	31538425	4747	3011	1219
17	7317398	8306425	2965	2019	800
17	11102815	12534769	4207	2841	1137
17	13894637	15019097	4786	2898	1194
17	12534769	13180372	2655	1625	679
17	63148128	64800430	6336	3234	1185
17	72672203	74375560	4996	3037	1233
17	69387817	72672203	11084	8038	3498
17	64800430	67858770	8602	5495	2219
17	74375560	76263413	7244	4891	2177
17	9965921	11102815	3629	2277	1036
17	80034408	81194908	4566	2747	1001
17	31538425	32912798	4958	2952	1202
17	32912798	34469036	4270	2413	1005
17	78837588	80034408	4510	2975	1211
17	56	1172399	5302	4043	1906
17	3702312	4696261	3466	2432	1038
17	1172399	1928731	3232	2282	988
17	49898957	50719055	2170	1065	359
17	43056905	45876022	9069	4141	1338
17	45876022	47517400	4741	2510	941
17	55357541	57487512	5045	3163	1339
17	47517400	49898957	6146	4334	1838
17	5741334	7317398	5710	4123	1728
17	4696261	5741334	3951	2337	823
17	1928731	3702312	6357	4293	1773
17	34469036	36809344	5219	3613	1612
18	69621618	71038474	5474	2941	1165
18	67175820	68621179	4630	2672	1103
18	68621179	69621618	3963	2194	810
18	71038474	71971462	3620	2338	950
18	63463402	64252801	2782	1166	385
18	60277715	61820252	4392	2272	934
18	26875587	27866478	2990	1362	465
18	22996651	24026191	2731	1488	537
18	5834180	7090485	3922	2575	1200
18	33861964	35075250	2742	1679	658
18	30264066	31780067	3268	1412	554
18	35075250	36365490	3308	1725	668
18	11075913	11905440	3044	1830	789
18	912486	1942911	3553	1875	762
18	3891658	5834180	7085	4466	1893
18	25927682	26875587	2466	1021	350
18	1942911	3891658	7711	5140	2229
18	20649472	22996651	5909	3914	1532
18	11905440	14440799	9222	5261	1985
18	19485844	20649472	2962	1640	622
18	10644	912486	3992	2654	1185
18	31780067	33861964	5072	2592	980
18	8498931	11075913	10348	6377	2713
18	7090485	8498931	4502	2760	1172
18	55213838	56530220	4889	2942	1173
18	56530220	57630483	4292	2794	1104
18	66125817	67175820	3266	1677	691
18	64252801	66125817	7066	3611	1283
18	51062185	51554175	2416	906	251
18	36365490	37684367	2912	1491	505
18	44299246	45939732	5060	2999	1152
18	42922106	44299246	4149	2619	998
18	47730584	51062185	10507	5783	1998
18	75976317	77149991	5048	2830	1143
18	45939732	47730584	6162	3682	1392
18	74813815	75976317	5672	3422	1422
18	71971462	73526987	4619	2824	1201
18	14440799	19485844	3927	2170	736
18	77149991	78017158	3584	2295	905
18	57630483	59020751	3808	2054	732
18	73526987	74813815	5256	3413	1491
18	37684367	39892648	6545	2861	1107
18	51554175	55213838	9145	4681	1735
18	61820252	63463402	5356	2575	902
18	24026191	25927682	5441	3169	1310
18	27866478	30264066	7251	3736	1447
18	39892648	42922106	8088	4052	1480
18	59020751	60277715	4259	2438	960
19	47150082	49282227	6857	4317	1825
19	44744108	46102697	4618	2908	1229
19	49282227	51532567	7626	5263	2331
19	16374416	18409862	7290	4767	2047
19	40170619	40984601	2478	1394	561
19	32746520	34262952	5654	3152	1228
19	37527033	40170619	7536	4310	1545
19	36469295	37527033	2997	1406	486
19	15648610	16374416	4057	1926	682
19	42131573	43862455	4718	2366	823
19	14486347	15648610	4249	2667	1131
19	34262952	36469295	7218	4302	1838
19	46102697	47150082	3873	2273	976
19	52985290	54602362	9059	6381	2806
19	57521335	59118839	5222	3284	1184
19	51532567	52985290	6072	3537	1526
19	54602362	55728080	6163	4259	1830
19	43862455	44744108	2833	1545	631
19	80840	610729	2112	1692	827
19	8347513	9238393	3155	1961	873
19	2098396	3019660	4186	2969	1238
19	11284028	13471127	5862	3320	1362
19	4348967	5811852	5516	4080	1748
19	6684885	8347513	7151	4887	2097
19	9238393	11284028	6486	3607	1427
19	19877471	20905757	4257	1929	635
19	13471127	14486347	2924	2110	945
19	5811852	6684885	3248	2088	916
19	18409862	19877471	3688	2310	921
19	3019660	4348967	5025	3864	1761
19	28557893	29790947	5147	2423	798
19	20905757	22732896	7960	2990	958
19	30727954	32746520	4858	2777	1215
19	23467746	28557893	7681	2999	993
19	22732896	23467746	3190	1337	393
19	29790947	30727954	3289	1960	813
19	55728080	57521335	7238	5073	2348
19	40984601	42131573	3780	2313	940
19	610729	2098396	5859	4755	2208
20	44839056	47199980	7065	4788	1919
20	52472549	54055266	5437	3207	1245
20	36909530	38436761	3937	2284	827
20	39610856	40585689	2446	1349	468
20	38436761	39610856	3082	2000	735
20	54055266	56447959	8753	5760	2435
20	34960446	36909530	3954	2358	976
20	49239658	52472549	10604	6668	2688
20	41615460	42680176	3212	2000	850
20	42680176	44839056	6269	3479	1375
20	59561724	61301855	7079	4686	1951
20	58406572	59561724	3531	2035	829
20	62190180	62965163	2722	1792	746
20	47199980	49239658	6064	3428	1273
20	60479	697600	2342	1731	841
20	2469501	3828413	4449	2732	1149
20	40585689	41615460	2968	2085	804
20	697600	2469501	6528	4261	1914
20	11249536	12447499	3860	1916	706
20	24717724	25344231	2219	969	306
20	13689864	15958359	7035	4181	1564
20	5477850	7084073	5577	3476	1456
20	61301855	62190180	3910	2743	1182
20	3828413	5477850	6677	4252	1737
20	23293790	24717724	5308	2312	851
20	31614823	32813441	2135	1341	521
20	25344231	31614823	7863	3925	1357
20	22491456	23293790	2140	1251	473
20	18972203	20959710	5561	3253	1320
20	7084073	8117011	3339	1620	586
20	56447959	58406572	6081	4045	1806
20	12447499	13689864	4437	2339	914
20	8117011	9730921	4720	2652	1067
20	20959710	22491456	3426	1650	643
20	17487232	18972203	5203	2880	1139
20	9730921	11249536	4916	2860	1255
20	32813441	34960446	4202	1933	669
20	15958359	17487232	5969	3297	1285
21	38711704	40482902	5623	3516	1362
21	26469122	27271019	2306	1282	412
21	18053165	19480375	4632	2887	1086
21	22072764	23362875	4827	2647	994
21	24696231	26469122	7154	3649	1304
21	9411243	15950982	8562	5897	3398
21	20962339	22072764	4327	2327	869
21	15950982	18053165	5225	3429	1406
21	19480375	20962339	5707	3275	1204
21	31197025	32668642	4448	1977	794
21	34376999	35225465	2255	1470	628
21	40482902	41389527	3816	2118	784
21	41389527	43321528	7650	5337	2189
21	35225465	36524373	3649	2445	1007
21	43321528	44506268	5731	3515	1414
21	36524373	37870779	4909	2776	984
21	37870779	38711704	2743	1555	633
21	29125226	31197025	6545	3436	1062
21	46177105	47492226	5046	3495	1271
21	32668642	34376999	5414	3324	1317
21	27271019	29125226	7035	4332	1612
21	23362875	24696231	4330	2150	818
21	47492226	48119752	2838	1611	547
21	44506268	46177105	5431	3730	1456
22	19912358	22357325	6229	3965	1829
22	24984204	26791628	6548	4269	1790
22	49824534	51243298	5454	3725	1468
22	27834752	29651799	4798	2972	1166
22	23712647	24984204	4217	2504	1020
22	16050408	17674295	4008	2683	1168
22	18296088	19912358	5486	3461	1555
22	26791628	27834752	4238	2871	1340
22	17674295	18296088	2637	1745	825
22	31439918	32664986	3640	1857	628
22	35530985	37570269	7158	4414	1814
22	46470495	47596318	4261	2794	1090
22	34494914	35530985	4289	2119	707
22	29651799	31439918	4926	2663	963
22	43714200	44995308	5114	3533	1453
22	32664986	34494914	6867	4272	1715
22	44995308	46470495	6219	4376	1795
22	37570269	39307894	4533	3051	1175
22	48903703	49824534	6157	4222	1736
22	22357325	23712647	6156	4139	1476
22	40545797	42690818	4540	2671	796
22	42690818	43714200	4108	2738	994
22	47596318	48903703	5183	3606	1451
22	39307894	40545797	3092	2084	842

## Sheet: ST3c
Supplementary Table 3c: Effective number of variants within LD Blocks in EUR population with MAF greater than or equal to 0.01.
CHR	Start Position	End Position	Number of Raw Variants	Unique Variants	Effective Number of Tests
1	247344518	249239466	7657	4287	1812
1	186810023	188759945	8410	3665	1410
1	61922365	63455089	5148	3095	1353
1	68477895	69687616	3982	2054	890
1	65041704	66939404	6050	3032	1291
1	113273306	114873845	4592	2790	1231
1	115880593	118839067	9187	4732	2130
1	118839067	144977494	9132	6034	3216
1	63455089	65041704	5654	3028	1357
1	66939404	68477895	5427	2854	1200
1	203334734	204681068	4427	2884	1289
1	201589975	203334734	5247	3372	1569
1	178944309	178954470	36	27	14
1	49894177	51713726	3175	1454	597
1	196176201	197311514	2831	1391	498
1	102041016	102898745	3534	1440	631
1	100826405	102041016	3909	2076	871
1	57021728	58865399	6631	3785	1622
1	189904130	191868930	6219	2870	1012
1	96150893	97885249	5645	2687	1042
1	51713726	54226262	7021	3402	1496
1	56413117	57021728	2219	1198	470
1	197311514	199239884	5436	2879	1107
1	9365199	10806984	4261	2599	1222
1	38731847	40200567	4608	2791	1235
1	37549183	38731847	3819	2249	1017
1	32438685	34799758	6060	3656	1655
1	169086324	170557776	5993	2462	893
1	170557776	173097907	8263	4208	1676
1	5913893	7247335	4632	2969	1245
1	1892607	3582736	6842	4776	2228
1	7247335	9365199	7006	4807	2062
1	34799758	37549183	6869	4158	1945
1	158027412	159913048	7324	3528	1521
1	162346721	165191702	10259	5525	2460
1	191868930	194107442	7338	3390	1354
1	43758457	44969183	2951	1785	742
1	86454751	88128631	6053	2853	1213
1	40200567	41975327	6192	3374	1506
1	83991748	84844495	2648	1320	536
1	159913048	162346721	8728	5076	2240
1	212842330	214578266	5694	3263	1408
1	71684405	74326907	7327	3072	1219
1	74326907	76728135	7504	3415	1347
1	84844495	86454751	5886	3174	1361
1	166460517	169086324	9682	5524	2448
1	54226262	56413117	8230	4794	2098
1	3582736	4380811	3569	2149	1007
1	44969183	46899501	4901	2404	968
1	88128631	90066303	5818	3009	1321
1	11777841	12779466	3456	2176	980
1	204681068	206073265	4415	2654	1176
1	58865399	59890409	3588	1868	814
1	10583	1892607	4947	3365	1561
1	178954470	181144121	8193	3795	1471
1	199239884	200137649	3811	1771	703
1	210787750	212842330	8031	4065	1688
1	79661198	81354191	7052	3173	1145
1	194107442	196176201	8051	3240	1252
1	200137649	201589975	5581	3314	1448
1	76728135	79661198	10097	4935	2065
1	110303931	111741737	4651	2911	1289
1	229156248	230685255	5052	3183	1489
1	156336133	158027412	5816	3067	1413
1	182755356	184595513	5914	2848	1185
1	238567807	239925314	5665	2949	1272
1	240564091	241582220	4061	2742	1341
1	241582220	242071602	1972	1210	563
1	18662899	20469149	7377	4270	1971
1	233429284	234599434	5138	3052	1367
1	219590571	221858231	7727	3732	1529
1	4380811	5913893	7342	4595	2055
1	208410364	210787750	7797	4877	2095
1	20469149	21736588	4267	2456	1034
1	234599434	235819436	4407	2698	1266
1	222230220	224938520	8169	4828	1934
1	242071602	244109499	7126	4371	1761
1	230685255	232090252	5111	3027	1343
1	216243634	218705513	9076	5014	2128
1	221858231	222230220	1182	744	305
1	69687616	71372470	5264	2766	1126
1	154770403	156336133	3016	1897	853
1	144977494	148361253	5824	3394	1686
1	16897730	18662899	6893	4709	2362
1	153180829	154770403	4232	2545	1129
1	148361253	151538881	5842	3505	1729
1	237555628	238567807	4649	2463	995
1	114873845	115880593	3201	1491	615
1	235819436	237555628	7174	4374	1871
1	151538881	153180829	4648	2346	924
1	206073265	208410364	5966	3481	1568
1	226810860	229156248	7883	4106	1538
1	91886317	93536459	4979	2634	1027
1	232090252	233429284	5394	3074	1374
1	224938520	226810860	6090	3224	1320
1	97885249	99800604	6168	2998	1290
1	111741737	113273306	5420	3143	1400
1	214578266	216243634	5549	2952	1206
1	14891511	16897730	8075	4866	2159
1	30161881	32438685	8093	4668	2023
1	184595513	186810023	5670	3039	1228
1	93536459	94506191	3004	1252	520
1	188759945	189904130	4420	1502	561
1	173097907	175089768	5104	2139	773
1	41975327	43758457	5443	2755	1123
1	12779466	14891511	7047	4484	2087
1	10806984	11777841	3322	2112	977
1	90066303	91886317	5406	3060	1338
1	244109499	245506746	5420	3690	1750
1	175089768	177433381	7135	3642	1536
1	23086883	23920590	2141	1309	564
1	46899501	48002576	3466	1922	762
1	108409665	110303931	5832	3157	1454
1	25516845	27401867	4252	2637	1129
1	177433381	178944309	4277	2392	942
1	106087842	108409665	7457	3901	1680
1	181144121	182755356	5348	2950	1278
1	27401867	30161881	6977	3926	1707
1	71372470	71684405	899	425	169
1	21736588	23086883	5679	3615	1603
1	165191702	166460517	4420	2536	1114
1	81354191	83991748	9677	5398	2187
1	245506746	247344518	9178	5425	2255
1	103914211	106087842	8450	3576	1323
1	218705513	219590571	3323	1556	634
1	94506191	96150893	5309	3066	1295
1	48978188	49894177	1904	1081	453
1	239925314	240564091	2773	1738	726
1	59890409	61922365	5906	3314	1529
1	99800604	100826405	3485	1498	639
1	48002576	48978188	2832	1613	691
1	102898745	103914211	3820	1296	497
1	23920590	25516845	4941	3179	1415
2	167355970	169968236	9290	5053	1971
2	8422147	10298469	6549	4247	1843
2	6836254	8422147	5201	3055	1440
2	89154526	95326452	2960	2331	1016
2	18647423	19692404	3490	1953	813
2	19692404	21050490	5171	3190	1385
2	14335308	16329735	6995	4031	1656
2	164466638	165178840	1597	951	392
2	16329735	18647423	8522	4408	1893
2	215573795	217715661	7436	4682	1999
2	220454551	222521176	7307	4384	1803
2	165178840	167160270	5539	3085	1200
2	218395480	220454551	5163	3063	1413
2	167160270	167355970	703	386	155
2	161769733	163503551	4046	1837	813
2	47318772	48213001	3441	2464	1062
2	56203345	57429100	4490	3045	943
2	1781022	3973779	9178	5774	2558
2	241560084	242149921	2476	1587	706
2	35345028	36122006	3898	2159	594
2	163503551	164466638	2718	1288	556
2	5708337	6836254	4761	2586	1121
2	54685226	56203345	6013	3854	1241
2	38132712	39031337	3552	2459	850
2	39031337	40281483	3735	2306	821
2	3973779	5708337	6609	3852	1697
2	30463711	31550450	4563	2929	1158
2	50818928	52491133	6006	4161	1317
2	52491133	53508452	4894	2994	861
2	48213001	50022257	6912	4772	1569
2	85140680	88038507	8249	4819	2023
2	44313803	46482634	8479	6428	2556
2	53508452	54685226	4645	2953	1006
2	198078110	199311125	2777	1352	524
2	242149921	243188920	3851	2406	933
2	217715661	218395480	2653	1545	621
2	214014282	215573795	5435	2797	970
2	212379518	214014282	6676	4007	1489
2	12419150	14335308	7442	3751	1551
2	158533218	159577082	3907	1991	781
2	157560635	158533218	2131	1223	559
2	130067170	130658085	1963	989	437
2	138698117	140100271	4518	1881	840
2	46482634	47318772	3597	2527	990
2	152486782	154005056	4900	2667	996
2	151731462	152486782	2666	1332	513
2	142518602	144519484	6559	3403	1371
2	147277162	150210292	7132	3583	1497
2	133042784	135158578	7044	4567	1902
2	141805351	142518602	3666	1919	654
2	50022257	50818928	3061	2033	622
2	150210292	151731462	4778	2475	1094
2	128034347	129474441	4949	2650	1108
2	154005056	155391135	5174	2974	1045
2	140100271	141805351	7339	3374	1267
2	130658085	133042784	7294	4127	1715
2	209941529	212379518	8024	4251	1507
2	36122006	38132712	8646	5698	2116
2	144519484	146445570	4176	2410	1082
2	137042794	138698117	6676	3192	1159
2	10298469	12419150	9468	5936	2701
2	129474441	130067170	2162	1004	440
2	155391135	157560635	6364	3280	1215
2	159577082	161769733	8274	4130	1558
2	208645399	209941529	4036	2282	930
2	33363777	35345028	9634	6013	2186
2	146445570	147277162	2029	1060	436
2	31550450	33363777	5819	3743	1244
2	40281483	43309590	12394	8584	2844
2	57429100	58297315	3505	1960	578
2	135158578	137042794	4444	2043	781
2	181312739	182266031	3471	1692	629
2	177363636	178553183	3985	2117	851
2	184357608	185280173	3577	1615	540
2	169968236	171226245	5458	2864	1129
2	224859419	225840004	3340	1745	674
2	98995201	101822329	8657	4270	1602
2	231843389	233550003	6024	3655	1521
2	222521176	224859419	7972	4057	1836
2	236043550	237449032	4927	3072	1336
2	238760981	239952643	5139	3108	1334
2	229370787	231843389	8906	5018	2219
2	21050490	23341383	6459	3823	1539
2	29217559	30463711	4466	3029	1214
2	235150987	236043550	4390	2761	1302
2	189882065	191973357	5984	2786	1120
2	107408267	108429177	3582	1594	665
2	101822329	102688765	2711	1476	605
2	233550003	235150987	5941	3676	1569
2	225840004	228119842	7505	3713	1600
2	24686918	26894985	6238	3736	1526
2	116772470	118367466	5998	2550	866
2	88038507	89154526	2865	1529	716
2	182266031	184357608	7331	3672	1406
2	237449032	238760981	5399	3266	1346
2	127373764	128034347	2823	1526	673
2	105125034	106210058	3622	2174	949
2	196447456	198078110	4554	2319	915
2	108429177	110572432	6268	3331	1362
2	106210058	107408267	5072	2710	1168
2	125840921	127373764	5631	2104	802
2	185280173	189882065	13557	5950	2016
2	118367466	121303783	9956	5108	2182
2	26894985	28598777	3961	2292	851
2	110572432	113921856	8020	4538	1987
2	113921856	116772470	8562	5006	1906
2	23341383	24686918	4892	2537	1026
2	175588929	177363636	5291	2962	1219
2	201576284	202818637	3514	1843	789
2	199311125	201576284	5354	3085	1223
2	95326452	98995201	6200	3535	1336
2	173138905	175588929	8533	5122	2249
2	10133	1781022	8561	4966	1960
2	76913661	78079264	5099	3185	1153
2	81620841	85140680	12324	4403	1602
2	28598777	29217559	2095	1373	575
2	68010176	69139564	4250	2272	940
2	64625913	65933444	4512	2792	1263
2	69139564	70755198	4389	2507	1005
2	80050403	81620841	4919	3145	1235
2	123302906	124732250	5686	2365	897
2	73174848	75630086	6710	4291	1652
2	78079264	80050403	7685	4440	1655
2	60292000	62429044	5928	3979	1437
2	65933444	67226166	4486	2643	1098
2	75630086	76913661	5305	3012	1097
2	103588215	105125034	4243	2030	899
2	58297315	60292000	5902	4186	1523
2	70755198	73174848	7982	4741	1936
2	43309590	44313803	3866	2656	921
2	62429044	64625913	5953	3752	1287
2	206735704	208645399	6115	3730	1572
2	205799241	206735704	2876	2184	935
2	195861164	196447456	2648	1119	446
2	102688765	103588215	2925	1398	550
2	228119842	229370787	5692	2840	1213
2	171226245	173138905	6577	3888	1527
2	178553183	181312739	9920	5314	2025
2	124732250	125840921	3768	1966	822
2	191973357	195861164	9299	5019	2138
2	239952643	241560084	7434	4729	2156
2	67226166	68010176	3340	2072	743
2	202818637	205799241	7601	4506	1824
2	121303783	123302906	6144	3344	1457
3	175116539	176320287	4465	2242	918
3	41064528	42540002	5314	2801	1045
3	36486842	38356116	5275	3013	1266
3	46657500	47727212	2132	1119	456
3	42540002	45165153	6678	3509	1454
3	72529329	74321817	6328	4250	1725
3	161524504	163253205	8612	2823	940
3	35283458	36486842	4251	2315	874
3	173477285	175116539	6216	3968	1447
3	168580960	170964909	7538	4183	1737
3	38356116	40221298	6427	3167	1307
3	167117429	168580960	3945	2029	867
3	170964909	172295731	4657	2948	1322
3	84367479	85582231	4363	1706	558
3	178107165	179374586	4054	2250	892
3	85582231	87409732	6589	2547	902
3	179374586	181511166	5288	3068	1238
3	58157519	60272906	8321	4992	1998
3	49316972	51832015	4640	2129	801
3	45165153	46657500	5647	2777	1039
3	190226607	192343814	9315	4696	1929
3	70449028	72529329	6338	4753	2080
3	157312028	159477890	6822	2995	1124
3	172295731	173477285	3823	2366	1008
3	188856214	190226607	6161	3598	1477
3	82643886	84367479	5257	2318	772
3	60272906	62355666	8332	5559	2297
3	6083183	7083387	4837	3071	1240
3	8648561	9543183	3526	2569	1187
3	87409732	88298373	2849	1232	446
3	192343814	194059671	6630	3950	1757
3	62355666	63669286	5412	3339	1415
3	163253205	165055469	6086	2297	801
3	165055469	167117429	8505	3027	1082
3	81427310	82643886	3392	1637	620
3	79024541	81427310	7275	3015	1095
3	60157	1441779	6229	4521	1848
3	11019665	13070799	7330	4448	1871
3	2992120	4431647	7192	4756	1913
3	9543183	11019665	5401	3590	1584
3	156008700	157312028	4244	1926	781
3	77508835	79024541	4307	2314	897
3	131836516	133252173	5311	2447	975
3	121974097	123517768	5035	2650	1193
3	151348730	153256571	6475	3355	1329
3	137371083	139954597	7053	3865	1591
3	154714218	156008700	4087	2013	828
3	135456906	137371083	4739	2490	857
3	176320287	178107165	6199	3485	1500
3	123517768	124936642	5342	3012	1241
3	128194861	130244735	6518	3394	1362
3	146726629	149043237	7935	4085	1795
3	153256571	154714218	5046	2051	809
3	150252004	151348730	3501	2170	895
3	143164628	144410816	4224	2009	865
3	7083387	8648561	7004	4418	1650
3	126214943	128194861	6164	3220	1309
3	4431647	6083183	7748	5715	2403
3	139954597	141339097	4313	2499	1027
3	124936642	126214943	5934	2939	1060
3	159477890	161524504	6392	2676	1024
3	130244735	131836516	5237	2667	975
3	144410816	145664619	5100	2154	821
3	145664619	146726629	4392	1930	746
3	74321817	75704949	5531	2925	1000
3	68286914	69276762	3475	2207	753
3	197075987	197946622	3138	1986	914
3	194059671	194786674	4114	2603	1170
3	133252173	135456906	6899	4211	1763
3	40221298	41064528	1938	1076	477
3	75704949	77508835	6184	3677	1369
3	112815699	113947863	3672	1890	806
3	141339097	143164628	6087	3335	1433
3	195971408	197075987	4163	2697	1192
3	115447080	116800153	4666	2773	1073
3	109522395	110513770	3501	1470	562
3	110513770	112815699	8304	3825	1540
3	94255316	95311971	4024	1551	493
3	103084960	104581613	6339	2658	1008
3	95311971	98215950	9314	3974	1348
3	100592217	103084960	7986	3612	1342
3	66270447	68286914	7515	4629	1687
3	104581613	106982811	8985	4375	1792
3	116800153	118530251	6108	3460	1282
3	63669286	65273538	5860	4255	1613
3	54081390	55348860	4560	3356	1362
3	120523055	121974097	4970	1866	717
3	1441779	2992120	8894	6328	2490
3	19125144	20091348	2283	1407	585
3	32351715	33255592	3967	2180	941
3	88298373	94255316	7786	3773	1277
3	20091348	21643707	7266	4223	1505
3	29142260	30717955	6858	4139	1712
3	65273538	66270447	3527	2534	1049
3	26877769	27840910	3922	1947	679
3	14816900	16282442	4896	2805	1175
3	16282442	17891118	5585	2755	1058
3	30717955	32351715	5875	3576	1488
3	106982811	109522395	8059	4170	1673
3	98215950	99373762	4776	2060	774
3	33255592	35283458	6427	3660	1297
3	25461558	26877769	4791	2588	1015
3	22204244	23804865	6316	3806	1276
3	149043237	150252004	4285	2437	1089
3	17891118	19125144	3600	1908	797
3	23804865	25461558	6633	4508	1666
3	13070799	14816900	6540	4267	1868
3	186890344	188856214	6775	4212	2007
3	27840910	29142260	4053	2642	1001
3	56433907	58157519	5842	3082	1131
3	118530251	120523055	6943	3315	1361
3	69276762	70449028	4002	2497	941
3	99373762	100592217	3028	1563	582
3	194786674	195971408	5878	4067	1750
3	181511166	183769683	6454	3728	1660
3	51832015	54081390	5381	3269	1304
3	185068255	186890344	5975	4007	1889
3	21643707	22204244	3528	2240	859
3	55348860	56433907	3739	2142	815
3	47727212	49316972	2396	1295	536
3	183769683	185068255	4436	2767	1281
3	113947863	115447080	3893	2217	1018
4	68059497	68854765	2789	1229	537
4	183371275	184929455	7138	4722	2154
4	170776510	172558635	7426	2978	1071
4	82125315	83372593	4410	2368	954
4	64341001	66600492	8907	3729	1365
4	71049152	72140558	4085	1566	648
4	91560677	94233299	8311	4159	1520
4	83372593	84799656	5019	2672	1146
4	178991910	180122043	4752	2423	983
4	182066807	183371275	6076	4373	1894
4	180122043	182066807	9483	5745	2346
4	107501305	108815348	3983	1910	853
4	58935008	60741087	7774	3306	1194
4	103221356	105305294	5889	2975	1093
4	100678360	103221356	8799	4438	1673
4	62371763	64341001	7500	3452	1317
4	56547644	58935008	9976	5380	2223
4	105305294	107501305	6454	3113	1234
4	72140558	74592390	6973	2989	1222
4	74592390	77130707	8812	3873	1603
4	53877433	55429556	5169	2789	1136
4	169676825	170776510	3171	1796	748
4	176570716	178991910	9275	5229	2213
4	174264132	176570716	8231	4520	2014
4	68854765	71049152	10058	4044	1429
4	15147446	15927009	2691	1427	565
4	17383322	18841874	5148	2462	972
4	10699152	12323034	7383	4250	1569
4	24135529	25609322	5476	3346	1529
4	14272001	15147446	3952	2173	835
4	184929455	186909090	8809	6136	2700
4	77130707	79093979	7003	3437	1416
4	94233299	96182188	6817	3745	1353
4	12323034	14272001	8281	4414	1678
4	99424067	100678360	5099	2148	915
4	9326479	10699152	7479	3858	1175
4	55429556	56547644	4510	2194	928
4	47411896	48123600	2306	1146	480
4	48123600	53877433	7399	4364	2019
4	161058864	161826435	3532	1988	712
4	167852917	169676825	7008	3685	1432
4	146178187	148521873	6980	3589	1533
4	158743718	161058864	7086	3572	1324
4	154477641	155056126	2233	1271	539
4	163243679	164478234	4558	2138	889
4	157485097	158743718	4515	2158	856
4	143443265	146178187	7642	3533	1303
4	136566407	138541971	7839	3600	1498
4	20544557	22319347	6964	3702	1458
4	152782184	154477641	5777	3307	1469
4	148521873	150683580	5718	3097	1294
4	134628434	136566407	6323	2903	1051
4	161826435	163243679	6748	2957	1126
4	150683580	152782184	5984	2827	1092
4	108815348	111256567	8121	4275	1853
4	80990297	82125315	3217	1522	644
4	22319347	24135529	5886	3511	1456
4	138541971	139556511	3778	1997	770
4	155056126	157485097	9158	4755	1933
4	164478234	165823448	5924	3239	1252
4	97540703	99424067	5784	2307	792
4	15927009	17383322	5476	3475	1433
4	167018858	167852917	3599	1510	566
4	141084631	143443265	7474	3768	1586
4	18841874	20544557	6673	2899	1126
4	96182188	97540703	5290	2582	995
4	7539692	8152235	3353	2549	1136
4	694715	1478711	3462	2014	766
4	2842979	3846040	4221	3038	1262
4	1478711	2842979	4813	3220	1305
4	84799656	86930609	6563	2948	1191
4	189693511	191043594	6938	4128	1805
4	139556511	141084631	4602	2963	1348
4	10240	694715	2228	1203	496
4	119933512	120392684	2317	1004	345
4	6773043	7539692	4121	3090	1378
4	118479918	119933512	5234	2248	812
4	127830293	128996665	2586	1360	473
4	113870102	115666246	6372	3376	1356
4	117276929	118479918	4769	2077	777
4	111256567	113870102	7890	4221	1662
4	120392684	122657987	9541	4184	1671
4	128996665	130591885	4823	2655	1118
4	86930609	87534648	1931	736	314
4	90231564	91560677	4126	1902	784
4	127275477	127830293	2466	1296	447
4	115666246	117276929	5413	2125	803
4	89238028	90231564	3305	1795	766
4	60741087	62371763	6849	2861	1171
4	87534648	89238028	6319	3131	1248
4	27343722	27965868	2789	1406	572
4	124286481	125210862	3246	1560	661
4	188472981	189693511	7188	4423	1920
4	43965045	45189157	5006	1936	761
4	35151415	36020436	4328	1661	648
4	30454535	31782981	5445	2721	1076
4	27965868	29762208	7640	3467	1252
4	45189157	47411896	6061	2959	1203
4	33172766	35151415	6365	2282	904
4	131283821	132954033	6161	2983	1077
4	125210862	126480886	4906	2368	970
4	38907022	40202609	4912	2671	1105
4	31782981	33172766	6282	2656	975
4	29762208	30454535	3173	1382	585
4	37255047	38907022	7385	4370	1852
4	122657987	124286481	5121	2256	837
4	40202609	42213058	7709	4540	2021
4	126480886	127275477	3156	1691	652
4	132954033	134628434	7389	2517	976
4	79093979	80990297	6072	2733	1090
4	165823448	167018858	4805	2591	1077
4	5502388	6773043	6222	4720	2158
4	4684116	5502388	4377	2639	1087
4	3846040	4684116	5083	3410	1365
4	36020436	37255047	5276	2291	867
4	186909090	188472981	7121	4707	2082
4	25609322	27343722	5057	3445	1571
4	42213058	43965045	7464	3170	1195
4	66600492	68059497	5220	2321	903
4	8152235	9326479	5596	3611	1603
4	172558635	174264132	4604	2480	1050
4	130591885	131283821	2662	1238	479
5	88891530	90422654	3884	2239	926
5	119669042	120452166	3397	1669	552
5	108633934	110821144	7422	4049	1495
5	175450595	177251507	5258	2998	1376
5	144943354	147181998	6708	3549	1543
5	120452166	122556905	8051	4266	1562
5	125785649	127344604	5546	2647	1096
5	136376050	139265072	6492	3686	1532
5	155373505	156628700	4036	2259	864
5	158825698	159973944	4077	2457	1117
5	148662624	150561298	6287	3823	1709
5	162743908	163771582	3742	2256	895
5	161482133	162743908	4154	2303	921
5	153773088	155373505	5596	2992	1263
5	147181998	148662624	5067	2493	1069
5	123798100	125785649	7966	5030	1899
5	85767290	87389991	4068	2136	834
5	111981562	113396285	6122	3353	1121
5	140645971	142981248	7800	4847	2190
5	105893055	107264196	5133	3352	1241
5	180559933	180885156	877	536	238
5	2132442	3361941	6815	4245	1964
5	127344604	129519025	7499	3214	1170
5	139265072	140645971	3088	1655	671
5	156628700	158825698	7408	3879	1572
5	7143218	8446336	5696	3012	1190
5	4632110	5973233	5676	3310	1540
5	83972689	85767290	8244	3528	1209
5	36433954	38802410	7012	4012	1698
5	52134622	53703044	6188	3079	1240
5	179401244	180559933	5311	3308	1484
5	150561298	152867774	8029	3934	1501
5	35048970	36433954	4707	2279	924
5	50163398	52134622	6326	3145	1144
5	5973233	7143218	4997	2829	1257
5	118608820	119669042	3946	2302	801
5	90422654	91840542	3509	1838	761
5	103320005	104851483	5251	2840	946
5	173642871	175450595	6692	4656	2220
5	152867774	153773088	3491	1615	656
5	115831047	117346213	6681	3914	1573
5	41888710	43983499	6045	2663	931
5	101578769	103320005	5302	2662	995
5	104851483	105893055	2886	1742	591
5	178413464	179401244	3950	2724	1254
5	159973944	161482133	5269	2384	981
5	91840542	93809984	3825	2090	958
5	134777401	136376050	5073	2569	1022
5	132139649	134777401	7335	4683	2082
5	27984513	29714820	6954	2960	1147
5	33500180	35048970	6115	3050	1293
5	8446336	9718832	5474	2888	1228
5	9718832	11173271	5784	3659	1579
5	122556905	123798100	4087	2527	934
5	168525318	169505664	3764	2149	959
5	3361941	4632110	4902	2767	1266
5	38802410	40287729	5414	2578	977
5	43983499	50163398	9062	3893	1244
5	99260992	101578769	8087	3495	1160
5	169505664	171074292	5377	3305	1560
5	166847740	168525318	5531	3986	1772
5	26857604	27984513	3589	1813	742
5	19917716	22152073	7104	3431	1370
5	114830370	115831047	4396	2484	873
5	14757804	16963613	6664	4188	1789
5	110821144	111981562	4472	2511	903
5	18051592	19917716	7507	3568	1305
5	142981248	144943354	6229	2995	1083
5	16963613	18051592	3796	2153	1000
5	177251507	178413464	5804	3739	1610
5	23494324	26184851	10221	4645	1806
5	26184851	26857604	2766	1206	492
5	982252	2132442	6087	4365	1967
5	13464832	14757804	4256	2573	1053
5	11940	982252	4751	2998	1223
5	165642395	166847740	3781	2710	1106
5	163771582	165642395	5879	4003	1519
5	63218987	63968304	1742	958	358
5	55417349	56621102	4508	2553	1191
5	79393144	80481471	4189	2581	1019
5	53703044	55417349	6476	3148	1262
5	61672995	63218987	5324	2498	916
5	60935907	61672995	1957	1054	452
5	75798866	77623332	6455	3819	1634
5	67850860	71240456	5188	2982	1269
5	56621102	57340073	2487	1214	564
5	57340073	58524622	4709	2589	1005
5	63968304	65911286	5776	2821	1188
5	58524622	60935907	6628	3461	1270
5	77623332	79393144	5794	3436	1465
5	65911286	67850860	6805	4002	1648
5	31390249	33500180	8219	4815	2202
5	73759326	75798866	6772	3674	1455
5	71240456	73759326	7850	4352	1835
5	107264196	108633934	5153	2713	872
5	40287729	41888710	5566	2366	920
5	29714820	31390249	6771	3232	1310
5	171074292	172678327	5598	3610	1701
5	95963519	97315601	6046	2214	872
5	11173271	13464832	7575	4140	1440
5	22152073	23494324	4665	2198	868
5	129519025	132139649	6005	2770	945
5	93809984	95963519	5892	3655	1529
5	117346213	118608820	4969	2868	1053
5	80481471	82025648	4359	2807	1095
5	113396285	114830370	5400	3097	1006
5	82025648	83972689	5292	3316	1483
5	87389991	88891530	2799	1487	641
5	172678327	173642871	3788	2311	1070
5	97315601	99260992	7215	3221	1132
6	154974120	156763326	6758	4311	1850
6	23936619	24852275	4168	2436	983
6	6785207	7808936	4587	3017	1306
6	24852275	25684587	3765	2125	835
6	10540317	11790816	4745	2787	1235
6	25684587	26791233	4136	1904	676
6	9020026	10540317	5958	3391	1505
6	22748307	23936619	5148	3136	1209
6	11790816	13209388	4753	2868	1243
6	7808936	9020026	5037	2706	1070
6	17386405	19207487	7654	3684	1391
6	14802924	17386405	8989	5677	2422
6	162169564	162931203	3189	2166	833
6	19207487	21684065	9148	5712	2341
6	73924	1452362	5882	3976	1979
6	1452362	2458936	3513	2135	1020
6	13209388	14802924	5186	3336	1424
6	151912703	153094496	4565	2505	1092
6	5791472	6785207	4597	2940	1314
6	21684065	22748307	4654	2874	1199
6	160580497	162169564	6346	3719	1484
6	158218719	160580497	9811	5026	2105
6	156763326	158218719	4558	2845	1312
6	123856181	125424383	5272	3427	1454
6	112345014	114220833	5277	2684	1172
6	121905676	123856181	6510	3090	1224
6	134244243	136224177	6082	3498	1528
6	139845436	142288479	6439	3156	1154
6	2458936	3573593	4951	3123	1384
6	145319810	146665424	3863	1542	552
6	116131396	117672972	5171	2280	891
6	136224177	137614218	3132	1982	929
6	127540461	129861031	6730	3289	1410
6	107450306	108464380	3047	1792	791
6	138822629	139845436	3899	2317	1041
6	3573593	4617817	4598	2759	1130
6	94441175	97093511	8745	3696	1496
6	102636772	103983395	5202	2114	734
6	169382050	170330173	3779	2043	803
6	100630146	102636772	6593	3043	1204
6	167024733	168042835	4800	2858	1165
6	150253404	151912703	7612	4715	2049
6	108464380	110304247	5463	2525	1049
6	97842284	100630146	8170	4141	1728
6	114220833	116131396	6402	2765	1024
6	137614218	138822629	4489	2464	1121
6	110304247	112345014	6820	3278	1347
6	97093511	97842284	2555	1097	458
6	168042835	169382050	7232	4290	1835
6	170330173	171051270	2918	1892	839
6	148920352	150253404	4551	2552	1023
6	103983395	106056733	7127	3620	1440
6	130935454	132765669	6023	3233	1329
6	118963115	119963278	3796	1659	632
6	129861031	130935454	4602	2416	1025
6	120512128	121905676	5640	2319	780
6	61880512	63552888	7190	2362	667
6	68849483	69523448	3235	1278	521
6	50386145	52210476	6625	2983	1148
6	119963278	120512128	2329	910	334
6	87069500	88822140	6364	2910	1100
6	48391125	50386145	6708	2586	941
6	37572596	39295677	6518	3689	1557
6	69523448	71609510	7486	3493	1324
6	106056733	107450306	5523	3162	1426
6	43756169	45406563	6168	3503	1458
6	55468270	56105313	2610	1029	409
6	88822140	89973052	4060	2107	892
6	75462003	77414881	5372	2533	1036
6	53279102	55468270	8941	4004	1551
6	33236497	35455756	8398	4585	1818
6	83127149	85209989	5863	2703	1087
6	71609510	73450097	7121	3136	1194
6	26791233	28017819	4130	1856	590
6	89973052	91843196	5911	3582	1570
6	91843196	93428644	5251	2698	1097
6	35455756	37572596	7237	4495	1919
6	125424383	127540461	4607	2537	1034
6	57599465	61880512	5046	1782	523
6	56105313	57599465	4706	2491	1132
6	47311898	48391125	3675	1624	638
6	162931203	164383521	5770	3331	1325
6	40345115	42038721	6216	3743	1692
6	39295677	40345115	3811	1936	790
6	165586864	167024733	6357	4117	1751
6	94118142	94441175	871	394	175
6	30798168	31571218	13415	5880	1385
6	52210476	53279102	4159	2254	1001
6	65765742	67329215	7383	3080	1074
6	45406563	47311898	6038	3315	1510
6	4617817	5791472	4659	2926	1290
6	31571218	32682664	19469	13381	2843
6	67329215	68849483	7632	2863	1049
6	32682664	33236497	6619	2802	818
6	146665424	148920352	7655	4862	2006
6	153094496	154974120	7985	3984	1686
6	73450097	75462003	8154	3559	1399
6	81929222	83127149	4091	1959	765
6	28017819	28917608	3654	1326	442
6	77414881	78957728	6257	2576	858
6	132765669	134244243	5005	2634	1067
6	117672972	118963115	4167	1865	729
6	142288479	145319810	8418	4807	2031
6	28917608	29737971	4496	1673	516
6	78957728	80691170	6672	2873	1115
6	85209989	87069500	6770	2670	976
6	80691170	81929222	5573	1978	617
6	42038721	43756169	5133	2991	1362
6	164383521	165586864	5513	2846	1164
6	63552888	65765742	7327	3049	1120
6	93428644	94118142	3038	1399	630
6	29737971	30798168	11882	4207	987
7	124156805	124167552	41	28	13
7	121933630	124156805	7150	3366	1293
7	124167552	126519170	8533	3756	1255
7	19481547	20124908	3714	1935	694
7	105682905	107780178	6549	4197	1723
7	157634597	159128575	7000	4340	1845
7	147815318	149840658	7541	4998	2135
7	150711505	152249806	4900	3443	1677
7	100196651	101199253	4313	2461	1061
7	132805848	134307596	4318	2216	777
7	141226557	142656310	4506	2252	1005
7	146427960	147815318	6049	3410	1219
7	134307596	135591083	4335	2393	1001
7	121045273	121933630	2985	1424	597
7	101199253	103197510	5723	3252	1334
7	139933177	140235210	1439	894	446
7	128778386	130422414	5095	3006	1288
7	142656310	144968289	6112	3171	1425
7	20124908	22507629	10009	7040	2757
7	112618684	113712387	3193	1583	616
7	116780178	118351581	4442	1977	736
7	118351581	121045273	6621	2876	1097
7	113712387	116780178	7644	3914	1686
7	144968289	146427960	5401	2566	961
7	153674019	154964730	5497	3813	1700
7	104159525	105682905	4772	3103	1333
7	152249806	153674019	6890	4219	1909
7	103197510	104159525	4302	2423	875
7	4573428	5416232	4118	3054	1241
7	6573857	7808752	6359	4144	1567
7	7808752	9123423	6795	4656	1875
7	2772227	4573428	9368	6606	2435
7	5854526	6573857	3292	2166	887
7	9123423	9987499	4746	2963	1070
7	1353067	2062398	3056	2150	820
7	12635461	13884202	6826	4231	1496
7	11299198	12635461	7170	4284	1415
7	15143657	16902069	7178	4822	1766
7	972752	1353067	2261	1452	572
7	5416232	5854526	1982	1351	582
7	22507629	23471442	3419	2054	784
7	31137289	33555768	9932	5263	1922
7	33555768	36213538	9561	5042	2051
7	28360309	31137289	10245	6582	2856
7	98715474	100196651	3327	1758	728
7	16161	972752	5337	3927	1816
7	25909555	28360309	8122	4542	1828
7	44763828	45952922	4446	2456	1052
7	63307359	63641125	1384	543	216
7	71874885	73334602	3134	1911	849
7	46986720	49212278	9221	4554	1911
7	97099570	98715474	6020	3189	1323
7	78093859	79888069	6392	3302	1363
7	87825004	90661784	10502	4903	1719
7	51675322	53176312	7820	3433	1300
7	54222976	55691584	6867	2974	1153
7	37555184	38966703	6220	3259	1305
7	49212278	51675322	8811	4312	1751
7	38966703	39862670	2955	1550	628
7	82022686	83801203	6779	3552	1383
7	85572182	87825004	6653	2890	1114
7	43159074	44763828	5113	2851	1171
7	92493752	93966601	4135	2279	1041
7	42001811	43159074	4213	2052	914
7	16902069	19481547	8867	6437	2623
7	69085364	71874885	9305	5221	2126
7	79888069	82022686	7065	4078	1722
7	73334602	76458564	7655	4820	2138
7	55691584	57382638	7202	3467	1265
7	57382638	63307359	8178	4800	1549
7	13884202	15143657	5181	3720	1464
7	63641125	65689809	7644	3386	1117
7	96073508	97099570	3191	1695	713
7	156065250	157634597	7417	4466	1891
7	83801203	85572182	5112	2312	852
7	9987499	11299198	6152	3493	1132
7	25077259	25909555	3255	1949	846
7	39862670	42001811	5693	3219	1408
7	45952922	46986720	4215	1952	789
7	2062398	2772227	3204	2312	946
7	93966601	96073508	5606	3210	1262
7	149840658	150711505	3737	1904	799
7	90661784	92493752	4173	2363	1006
7	65689809	68234074	12510	5749	2168
7	36213538	37555184	4979	3231	1418
7	107780178	109647594	6395	3369	1241
7	154964730	156065250	5390	3625	1764
7	126519170	126869221	1004	560	232
7	23471442	25077259	6388	3708	1365
7	109647594	112618684	8420	5253	1942
7	138744679	139933177	3532	2075	965
7	140235210	141226557	2425	1358	609
7	126869221	128778386	6139	3185	1265
7	135591083	136876562	4668	2496	1013
7	130422414	132805848	7512	5036	2277
7	136876562	138744679	6348	4350	1890
7	76458564	78093859	6433	3786	1464
7	68234074	69085364	3475	1864	820
7	53176312	54222976	5560	2232	791
8	107410754	108648177	4223	1939	781
8	11278998	13491775	10638	7394	2815
8	108648177	109248173	2083	891	382
8	121201700	124861459	11589	6595	2917
8	99401581	101620958	4807	2548	990
8	89085481	90638162	5151	2435	836
8	96534806	99401581	9122	5597	2393
8	111850847	113064320	2897	1228	462
8	63349306	65232872	5544	2648	981
8	5146927	6142797	8176	5523	1866
8	104123306	104988752	3388	1252	474
8	93554386	95005527	3625	2060	880
8	95005527	96534806	6031	3250	1311
8	90638162	93554386	7395	3642	1397
8	101620958	104123306	8939	5421	2447
8	10463197	11278998	3443	2592	887
8	87411709	89085481	5504	2934	1049
8	3392926	3783017	3932	2835	969
8	131639625	133351144	6967	3530	1461
8	126410917	128659111	8326	5098	2261
8	1044217	1163245	1016	710	272
8	124861459	125683719	2840	1662	701
8	2573279	3392926	6594	4531	1685
8	133351144	134570001	4741	2970	1308
8	128659111	130381139	6155	3416	1436
8	85955619	87411709	2965	1435	582
8	130381139	131639625	4594	2524	956
8	17836399	19492840	8891	6173	2342
8	1163245	2042942	5542	4348	1863
8	113064320	116096495	11128	4016	1398
8	4480476	5146927	4967	3500	1239
8	2042942	2573279	4222	2946	1194
8	42773823	46841315	3101	1472	596
8	15991660	17387876	6701	4584	1733
8	41721454	42773823	2818	1498	646
8	35317232	37379389	3667	2131	973
8	55945581	56956383	3613	1756	755
8	10422	1044217	5114	3866	1432
8	40703337	41721454	3940	2259	936
8	46841315	50082470	6911	3501	1244
8	73817199	75445064	5485	2980	1344
8	17387876	17836399	3021	1959	687
8	56956383	59068651	7910	3610	1495
8	79132861	81956395	8784	4496	1899
8	53302930	54418044	4306	2010	756
8	50082470	53302930	11364	4516	1751
8	20060856	21661737	6680	4515	1752
8	32977218	35317232	7828	2937	1184
8	84225589	85955619	6149	2345	905
8	125683719	126410917	2632	1486	653
8	82693739	84225589	5793	2259	895
8	76456542	79132861	9371	3614	1377
8	38938806	40703337	6879	3366	1320
8	62329099	63349306	3890	1635	646
8	110484314	111850847	3493	1510	658
8	144236881	146303867	5654	3892	1662
8	59728100	62329099	8188	4215	1676
8	22897057	24674718	6862	3897	1600
8	81956395	82693739	2299	1159	522
8	21661737	22897057	4187	3019	1304
8	13491775	13944992	3987	2434	707
8	75445064	76456542	3783	1678	699
8	139254830	140725643	5732	3707	1554
8	9640787	10463197	4014	3093	1027
8	104988752	107410754	7571	4071	1593
8	54418044	55945581	4514	2275	952
8	9154694	9640787	2321	1470	484
8	137524151	139254830	7501	3817	1466
8	140725643	143044914	7786	5358	2334
8	37379389	38938806	3429	2284	1156
8	28162392	29327896	3078	1952	867
8	31548360	32977218	4675	2490	968
8	26682525	28162392	6252	3181	1308
8	72289454	73817199	5671	3047	1303
8	13944992	15991660	12496	8278	2653
8	109248173	110484314	4035	1608	643
8	31133729	31548360	1683	857	345
8	25483454	26682525	5208	3062	1334
8	70867979	72289454	4188	2124	858
8	7153079	9154694	6690	4774	1986
8	66489090	69863057	10219	5087	2160
8	65232872	66489090	3407	1715	767
8	24674718	25483454	2890	1585	663
8	69863057	70867979	3605	2140	976
8	59068651	59728100	2534	1256	507
8	19492840	20060856	2710	1826	733
8	116096495	119685457	9402	5393	2359
8	3783017	4480476	6209	4811	1811
8	143044914	144236881	5371	3160	1240
8	29327896	31133729	5587	3270	1448
8	6142797	7153079	6286	4461	1868
8	119685457	121201700	5612	2588	986
8	136035605	137524151	5179	2782	1068
8	134570001	136035605	6383	3699	1531
9	32019368	33578334	6106	3295	1362
9	1079707	1916877	4659	3274	1188
9	84211233	85440801	3117	2035	891
9	20463534	22206559	5905	4000	1434
9	92528698	94167203	6179	3320	1397
9	96671698	98922040	7486	3949	1557
9	101592859	104624437	9416	4805	1875
9	104624437	105967976	6631	3231	1165
9	94167203	96671698	9777	4741	1769
9	90136246	92528698	9097	5067	2129
9	22206559	24158518	6878	4814	1846
9	28224283	28811584	2381	1560	651
9	76973081	78900183	7288	4473	1971
9	7154923	8456299	6799	4796	1785
9	98922040	101592859	8084	4634	1896
9	6557589	7154923	3287	2221	798
9	81079055	82590928	4853	3332	1418
9	82590928	84211233	7299	3885	1382
9	79471208	81079055	5632	3277	1279
9	25330810	26111757	3026	2159	879
9	24158518	25330810	4976	2821	1064
9	129059665	130055510	2787	1752	796
9	115693145	117019801	4838	3085	1400
9	139500342	141144796	5061	3711	1706
9	65472190	72512711	9472	6404	3137
9	137589364	138938978	6442	4740	2282
9	121321537	122260297	2678	1688	728
9	138938978	139500342	2343	1637	735
9	112778024	114831082	8556	4926	2019
9	124871322	126971887	6651	3898	1667
9	126971887	129059665	4918	3202	1286
9	105967976	107581749	6383	2981	1076
9	137041122	137589364	2141	1542	746
9	34642243	36743283	5616	3457	1470
9	133223217	134127888	3380	2333	1119
9	110695062	112778024	8497	4971	1875
9	109298754	110695062	5095	3170	1436
9	114831082	115693145	2857	1458	577
9	117019801	117921960	3257	2129	872
9	72512711	72753755	769	421	181
9	117921960	121321537	11681	6664	2664
9	107581749	109298754	6223	3566	1508
9	76203946	76973081	2278	1105	458
9	10023	1079707	5926	4396	1639
9	72753755	74253040	5201	2709	1066
9	8456299	9166403	3503	2351	957
9	36743283	38641599	6193	3847	1727
9	135298842	137041122	7680	5110	2239
9	12276489	14836363	10584	7623	3097
9	38641599	65472190	6932	5120	2625
9	9166403	10879253	8636	5964	2173
9	130055510	132165470	5400	3374	1567
9	28811584	30387392	6862	3210	1087
9	122260297	124871322	7117	4234	1725
9	88590417	90136246	5395	3135	1356
9	16659655	18661051	8919	5718	1968
9	86938196	88109333	4353	2174	897
9	4884926	6557589	5486	3884	1374
9	74253040	76203946	5937	3091	1274
9	132165470	133223217	4206	2488	1182
9	14836363	16659655	7011	4934	1809
9	3190064	4495328	5199	4083	1717
9	1916877	3190064	6017	4600	1863
9	134127888	135298842	3742	2356	1055
9	4495328	4884926	1915	1345	611
9	26111757	28224283	8483	5648	2161
9	78900183	79471208	2414	1611	689
9	33578334	34642243	3648	1685	636
9	31310383	32019368	3158	1226	457
9	88109333	88590417	1367	638	296
9	85440801	86938196	5293	3202	1291
9	18661051	20463534	7199	5192	2017
9	10879253	12276489	6791	4010	1095
9	30387392	31310383	3994	1798	577
10	29323236	29783692	2283	1337	604
10	25578596	26888684	6619	2935	1107
10	16551767	18537267	7713	5034	2024
10	130844284	131741327	3742	2245	999
10	29783692	30458838	2843	1850	801
10	60289987	61891409	4985	2827	1201
10	57662146	58959528	5527	1920	605
10	110317705	112561493	7151	3727	1455
10	44730075	48760450	9088	5291	2398
10	48760450	50840915	5425	3161	1334
10	50840915	53616629	7482	4328	1877
10	30458838	31907519	4959	2844	1156
10	55103572	57031140	8999	4670	1620
10	19716878	22772283	10285	6357	2243
10	131741327	132580245	4046	2119	913
10	58959528	60289987	5859	2236	836
10	134494673	135523865	5050	3065	1389
10	100241302	100668400	1495	728	273
10	4572274	5983762	7634	4400	1780
10	95396368	96221243	2310	1352	562
10	10249396	12586797	9451	6310	2702
10	69900148	70195991	1288	615	252
10	63341695	65794114	8517	4053	1680
10	122407323	123231465	3343	1992	844
10	5983762	7171484	6046	4316	1992
10	89127064	91013381	5738	3298	1468
10	67549615	69900148	10030	4292	1609
10	87937577	89127064	4002	2195	883
10	73508512	75422550	4547	2217	929
10	129154362	130844284	8335	5156	2435
10	57031140	57662146	2056	932	356
10	62659679	63341695	1802	814	357
10	92006581	93335047	4421	2257	918
10	70195991	72220850	8405	4945	2216
10	72220850	73508512	5513	3750	1699
10	3352699	4572274	5014	3123	1379
10	96221243	97822357	5775	2565	952
10	18537267	19716878	5921	3380	1162
10	97822357	100241302	7319	4564	2019
10	13321600	15026068	7361	5327	2188
10	61891409	62659679	3015	1509	560
10	93335047	95396368	7048	3575	1425
10	84383745	85458703	4725	1940	712
10	8774665	10249396	5668	3185	1210
10	128001098	129154362	3666	2507	1138
10	80876749	82414679	7425	3816	1485
10	65794114	67549615	6184	2795	1072
10	1523544	2254500	3953	2340	1060
10	91013381	92006581	4034	2083	787
10	751339	1523544	3577	2387	1008
10	82414679	84383745	7362	3650	1534
10	112561493	115328432	8642	5558	2344
10	78706814	80876749	6915	4526	1968
10	22772283	23175132	1308	861	297
10	106695048	108726686	6875	3678	1360
10	123231465	123900545	2818	1756	769
10	102949239	104380410	3202	1811	727
10	12586797	13321600	3528	2583	1157
10	125869346	128001098	7869	5012	2075
10	100668400	102949239	6888	3809	1609
10	36572508	37790029	4180	2022	835
10	7171484	8774665	7503	4832	2142
10	2254500	3352699	6192	3775	1655
10	123900545	125869346	7737	4889	2095
10	60523	751339	2062	1402	539
10	85458703	87937577	9773	4475	1813
10	75422550	78706814	7889	4501	1809
10	115328432	116421406	3556	2194	954
10	37790029	42372579	7186	2588	764
10	104380410	106695048	6492	3804	1446
10	43894771	44730075	4079	1663	682
10	33707968	35109355	4520	2735	1122
10	116421406	119523934	9374	5404	2249
10	108726686	110317705	6379	3523	1222
10	120591353	122407323	6688	3966	1713
10	15026068	16551767	5845	3910	1448
10	23175132	25578596	7524	4471	1881
10	35109355	36572508	4647	2429	1014
10	132580245	134336329	9222	5969	2628
10	42372579	43894771	6840	3392	1197
10	31907519	33707968	6920	3306	1214
10	53616629	55103572	6125	3426	1333
10	134336329	134494673	537	257	114
10	26888684	29323236	10884	5334	2135
10	119523934	120591353	3568	2140	970
11	109866116	111114397	4105	2297	902
11	98705065	100417169	8048	5044	1782
11	112459488	114257728	6044	3542	1557
11	114257728	114830666	1939	1064	430
11	111114397	112459488	3211	1746	763
11	107844200	108437037	1366	759	283
11	108437037	109866116	3684	2359	890
11	104873284	106520894	4779	2237	848
11	100417169	101331121	3975	2002	794
11	101331121	103959636	10894	5486	2104
11	106520894	107844200	5477	2938	1062
11	97057058	98705065	7381	3858	1353
11	6322869	7436701	4292	2566	1087
11	133000046	134205993	4186	2875	1349
11	134205993	134946452	4272	2690	1181
11	103959636	104873284	2784	1201	441
11	3665481	4746709	5241	3273	1184
11	93276157	94242260	3197	1580	584
11	94242260	95726041	4994	2783	1246
11	122591910	123500117	3746	2432	1172
11	120766806	121175943	1303	798	337
11	123500117	124495528	4366	1944	739
11	119215476	120766806	5067	3376	1482
11	121175943	122591910	4299	2739	1239
11	70855	1213590	4651	3201	1432
11	131074612	133000046	7182	5103	2283
11	127316679	128188537	3291	1666	715
11	126311320	127316679	3742	2226	1049
11	130342575	131074612	3103	1973	868
11	114830666	116383348	4995	3437	1482
11	86619301	87430235	4073	1851	691
11	69516130	70926292	5103	3300	1448
11	90966490	92077144	4163	1932	714
11	28481593	30141357	4960	2569	977
11	70926292	72286017	5506	2521	1015
11	62223771	63804569	4146	2353	1041
11	65898631	68005825	5352	3127	1277
11	76797209	78355058	4542	2509	917
11	63804569	65898631	4885	3078	1321
11	81266712	84381272	11467	6555	2286
11	87430235	89208936	6796	3566	1221
11	39382003	42310003	10414	5196	1981
11	55082657	58457495	14319	4979	1494
11	22374142	24088517	7472	3612	1319
11	74412351	76797209	7096	4048	1763
11	47006137	49866050	9754	3924	1118
11	54695473	55082657	1889	714	223
11	32276901	33958739	5882	2982	1235
11	72286017	74412351	6244	3184	1287
11	89208936	90966490	5836	2838	944
11	33958739	35502605	6054	3126	1361
11	9087317	10952027	6744	4074	1474
11	37116815	39382003	7838	3169	1246
11	19569535	21017138	5748	3940	1720
11	78355058	80722373	8391	5926	2392
11	24088517	26045753	10470	4919	1754
11	58457495	58780549	1368	422	175
11	128188537	130342575	6894	4660	2119
11	84381272	86619301	7725	4258	1476
11	49866050	54695473	8221	2672	668
11	95726041	97057058	4344	2635	1102
11	21017138	22374142	5055	3008	1219
11	12564229	13373124	3023	1766	760
11	30141357	32276901	4909	2677	1073
11	44693799	47006137	6120	3648	1568
11	13373124	15742552	6803	3405	1434
11	42310003	44693799	9629	4986	2059
11	4746709	6322869	9157	4867	1840
11	1213590	3665481	11468	7853	3470
11	8333274	9087317	2737	1655	576
11	7436701	8333274	4826	2928	1239
11	116383348	117747110	5581	3479	1425
11	117747110	119215476	4434	2705	1112
11	68005825	69516130	4834	2819	1203
11	124495528	126311320	6475	3931	1727
11	92077144	93276157	3670	1932	758
11	80722373	81266712	2466	1485	596
11	35502605	37116815	5580	3352	1438
11	26045753	27020461	5005	1935	812
11	10952027	12564229	7233	5172	2266
11	15742552	17578402	5184	2591	1057
11	17578402	19569535	7060	4065	1742
11	58780549	62223771	9992	5568	2359
11	27020461	28481593	3587	1757	720
12	64032461	65559695	4364	2505	1117
12	80448150	81467767	3273	1572	649
12	54778823	55665837	3426	1478	672
12	59308666	61123729	5374	2410	889
12	118135375	119754110	6183	3708	1658
12	119754110	122007651	7548	4325	1768
12	126445505	127875098	5986	3316	1458
12	122007651	124977980	9310	5367	2183
12	47714793	49001866	5337	2636	1028
12	127875098	129237297	5982	4109	1955
12	85990426	89682122	10886	4338	1637
12	76511314	78570570	7629	4035	1652
12	72645075	73818454	4016	1884	684
12	49001866	51776494	7453	3811	1612
12	15241484	16310460	2364	1389	676
12	39227169	40816185	5171	2489	890
12	10481534	11754846	5798	2657	1001
12	124977980	126445505	6113	3927	1784
12	20863943	23820634	10469	5707	2260
12	33076989	37856717	7394	2667	737
12	9031395	10481534	5747	3304	1361
12	53039004	54778823	5281	3069	1364
12	43984474	46024229	5873	2607	1083
12	37856717	39227169	6053	2185	591
12	3677037	4417679	2795	1890	968
12	1080331	2544786	5920	3522	1680
12	67909729	69826542	6867	4182	1809
12	46024229	47714793	4773	2615	1042
12	4417679	5321472	3217	2153	976
12	5321472	6419753	4112	2577	1168
12	25371083	27799773	9634	5145	2141
12	18087873	20863943	11542	6658	2536
12	8377536	9031395	2713	1710	732
12	11754846	12733528	3785	2668	1189
12	32165592	33076989	4500	2374	930
12	6419753	8377536	6947	4469	2037
12	106958748	109025901	6805	3669	1510
12	29651255	30512406	4493	2254	893
12	106436213	106958748	1716	1038	475
12	16310460	18087873	5822	3336	1275
12	55665837	57548860	4592	2538	1180
12	104848696	106436213	6039	3438	1414
12	40816185	41658586	3592	1603	591
12	2544786	3677037	4280	2894	1373
12	97108839	99305987	7636	4534	1868
12	27799773	29651255	7185	3442	1328
12	101447641	101862690	1404	837	361
12	61107	1080331	3787	2715	1342
12	12733528	15241484	8990	5687	2411
12	84303844	85990426	4817	2060	770
12	23820634	25371083	6064	3929	1663
12	57548860	59308666	5000	2447	1023
12	99305987	101447641	6259	3455	1421
12	129237297	130377921	5424	3968	1788
12	130377921	131786751	7298	4998	2216
12	30512406	32165592	7633	4093	1651
12	115503216	117087471	5883	3972	1748
12	69826542	70957987	4482	2228	825
12	132807034	133841511	4309	2814	1182
12	83502666	84303844	3589	1302	511
12	115036602	115503216	1967	1258	614
12	102964986	104848696	7175	3879	1658
12	131786751	132807034	4079	2591	1118
12	110336719	113263518	5304	2893	1141
12	113986709	115036602	4586	2770	1168
12	101862690	102964986	3685	1946	830
12	89682122	92066155	6846	3315	1367
12	94514567	96020785	6766	3935	1681
12	96020785	97108839	4366	2538	1089
12	92066155	94514567	8644	4810	2132
12	117087471	118135375	3697	2311	1009
12	109025901	110336719	4560	2572	1102
12	70957987	72645075	5620	2859	1217
12	61123729	64032461	10857	5280	2020
12	67181144	67909729	2687	1278	576
12	65559695	67181144	4560	2668	1207
12	41658586	43984474	8927	4360	1636
12	78570570	80448150	4704	2491	1150
12	51776494	53039004	4508	2688	1164
12	113263518	113986709	2283	1348	601
12	73818454	76511314	8939	4448	1681
12	81467767	83502666	6918	3170	1267
13	112247592	113572488	5041	3393	1550
13	59302271	60854778	5275	2706	1039
13	109815112	111232073	6594	4301	1953
13	57554217	58410626	2444	1076	401
13	53339622	54682864	4298	2335	911
13	58410626	59302271	2734	1180	420
13	54682864	55817131	4020	1739	708
13	113572488	115109853	5669	3733	1605
13	55817131	57554217	4414	1836	663
13	24531937	25784362	6386	3767	1567
13	93129691	93586455	1480	872	355
13	82581814	84133144	5110	2141	768
13	78808813	80585676	5250	2913	1126
13	23594702	24531937	4801	2848	1203
13	22242174	23594702	6341	4045	1902
13	19020013	20686720	8217	4283	1579
13	51591091	53339622	4529	2457	1034
13	84133144	85610916	5465	2443	908
13	93586455	96087558	9647	5777	2470
13	90521311	93129691	9686	4768	1985
13	20686720	22242174	6482	4001	1692
13	30483267	32301815	6865	3995	1861
13	47431079	49383962	7107	3508	1344
13	75670143	77410555	6601	3723	1431
13	98938919	100574095	6679	4032	1641
13	35026464	36046367	2823	1441	596
13	46495214	47431079	3107	1726	737
13	29257551	30483267	4648	2374	1075
13	27284362	29257551	8107	4756	2103
13	109121210	109815112	3082	1695	764
13	33776903	35026464	4206	2098	936
13	104844114	106247554	5843	3326	1503
13	108189877	109121210	3976	2288	1088
13	96087558	97519210	3828	1998	682
13	102300523	104066710	6497	3849	1619
13	41069263	43101027	6610	3253	1339
13	43101027	44901409	5912	3301	1462
13	106247554	106750000	2246	1335	612
13	97519210	98938919	4420	2681	1173
13	77410555	78808813	4902	2189	849
13	104066710	104844114	3209	1723	719
13	25784362	27284362	5634	3103	1336
13	36046367	37498185	5213	2970	1273
13	71526791	73934089	8964	5187	2126
13	44901409	46495214	4699	2737	1229
13	65200602	67844453	7786	3900	1594
13	38878163	41069263	7758	4274	1872
13	63971559	65200602	5484	1937	714
13	60854778	61591949	3065	1517	564
13	100574095	102300523	6201	3719	1518
13	67844453	70724516	11611	5166	1872
13	49383962	51591091	6930	3756	1553
13	61591949	63971559	9740	4105	1464
13	111232073	112247592	4394	2703	1185
13	73934089	75670143	6435	3705	1595
13	80585676	82581814	7391	3688	1438
13	88559882	90521311	7492	2883	1093
13	85610916	88559882	10908	4711	1642
13	70724516	71526791	3424	1898	801
13	37498185	38878163	5496	2552	982
13	32301815	33776903	4622	2454	1101
13	106750000	108189877	5115	3240	1514
14	28466533	29972145	4596	2408	1001
14	87635341	89497643	6624	3063	1215
14	83138097	84241633	3985	1992	851
14	76444767	77229472	3163	1916	899
14	81579714	83138097	4938	2543	1143
14	77229472	78561945	5615	3227	1365
14	78561945	80186579	4949	2930	1256
14	80186579	81579714	4888	2669	968
14	86647002	87635341	3701	1941	779
14	85746319	86647002	3297	1991	739
14	21589402	23018665	6671	3685	1593
14	84241633	85746319	5470	2934	1116
14	57481262	59448336	6563	3824	1547
14	29972145	32383265	7437	4094	1735
14	51493572	53474383	7743	4502	1821
14	56216880	57481262	4974	3110	1281
14	19002084	21589402	8277	6022	2967
14	32383265	34846251	9343	6749	3111
14	63790015	65220298	4470	2346	907
14	53474383	53997831	1898	918	341
14	61680424	63790015	7781	4736	1827
14	59448336	61680424	6594	3258	1157
14	34846251	35859593	4420	2221	814
14	40341990	41615502	6344	2224	718
14	101534307	103012102	5366	3211	1479
14	38667725	40341990	5693	3008	1025
14	44543227	46081896	4535	2313	935
14	46749130	48573586	6986	3581	1211
14	96262415	98341162	7492	4388	2081
14	41615502	43137389	5660	2728	855
14	24905123	26135686	5026	2514	977
14	43137389	44543227	5895	2944	967
14	95750867	96262415	2581	1635	778
14	53997831	55233681	3565	2215	1009
14	49005471	50507760	4900	2913	1141
14	66399555	67992317	6110	1983	734
14	91296860	93132299	6940	3967	1779
14	106340358	107289454	5664	4342	1265
14	93132299	94325285	4067	2261	973
14	35859593	38667725	8044	4427	1814
14	105001723	106340358	4709	3412	1489
14	98341162	99138532	3872	1826	778
14	103012102	105001723	7458	4269	1764
14	67992317	71131957	10350	5788	2419
14	48573586	49005471	1864	714	252
14	94325285	95750867	6414	3915	1842
14	89497643	91296860	6373	3942	1807
14	26135686	28466533	7720	4280	1777
14	65220298	66399555	4219	2366	929
14	23018665	24905123	6627	4224	2110
14	71131957	72889615	6069	3309	1270
14	46081896	46749130	2412	1105	352
14	99138532	101534307	8301	5354	2494
14	50507760	51493572	3253	2011	818
14	72889615	76444767	11169	6551	2676
14	55233681	56216880	3560	1685	599
15	32441811	34015425	5921	3936	1820
15	25108590	27298112	8805	5646	2610
15	24195127	25108590	7079	3149	903
15	54508528	55136269	3049	1678	565
15	48136048	50008043	4687	2117	839
15	53069096	54508528	5878	3252	1264
15	50008043	51677560	5822	2962	1076
15	55136269	56901773	7375	3938	1387
15	51677560	53069096	3999	2303	880
15	56901773	58441366	5226	3575	1316
15	30165568	31591821	3436	2314	1070
15	31591821	32441811	2800	1696	717
15	20001200	21131604	1944	1615	1042
15	40384132	41177514	2112	1309	532
15	42776399	44198049	2278	1368	511
15	35083251	37456502	7729	4615	2166
15	38530777	40384132	6744	4011	1652
15	70133341	71922649	5779	3835	1712
15	69017999	70133341	3003	1853	839
15	76398624	78516053	6445	3479	1288
15	90475551	92164392	6453	4521	1758
15	61265836	63215222	6968	5028	2071
15	59694116	61265836	5452	3749	1560
15	88369943	90475551	6707	4873	2062
15	71922649	73628714	4199	2257	876
15	63215222	65104668	5890	3275	1266
15	27298112	29338502	5769	3484	1617
15	94924330	96141596	4383	3028	1389
15	92164392	93780902	6788	4955	2111
15	99244059	100636847	6009	3845	1580
15	100636847	101552694	4450	2856	1254
15	58441366	59694116	4571	3265	1271
15	86652905	88369943	7162	4729	1715
15	101552694	102520966	3818	2832	1323
15	41177514	42776399	4674	2609	1028
15	37456502	38530777	3668	2250	855
15	78516053	80860978	9243	5708	2340
15	96141596	98030910	6610	4380	2043
15	65104668	67094767	6461	3890	1583
15	73628714	76398624	6847	4040	1697
15	84260468	86652905	8483	5333	1796
15	67094767	69017999	5893	3580	1493
15	98030910	99244059	5741	3907	1691
15	44198049	46618787	6166	3327	1378
15	46618787	48136048	5366	2551	959
15	34015425	35083251	4843	2698	1122
15	80860978	84260468	8230	5385	2205
15	21131604	24195127	6411	4958	2723
15	29338502	30165568	2755	1645	753
15	93780902	94924330	5651	3736	1760
16	55903774	57664330	6601	3954	1747
16	53382572	55903774	9724	6036	2674
16	59045405	60745694	5978	3411	1312
16	74971503	75977954	3949	2335	843
16	60745694	62229849	4054	2100	874
16	77523678	78456292	6135	3993	1546
16	79134815	80297374	6015	4387	1679
16	24136875	25986862	7125	4347	1983
16	57664330	59045405	6182	3508	1494
16	71054028	72935150	4854	3171	1044
16	78456292	79134815	4989	3755	1564
16	2764829	4001196	3946	2914	1243
16	4001196	5118345	4450	3221	1329
16	62229849	63691589	4631	2706	1120
16	6893551	7529121	4875	3283	1125
16	86156599	86815411	4130	3245	1446
16	9799419	10426032	2995	1905	698
16	5118345	5891580	4602	3441	1312
16	89041165	90292812	5411	3745	1408
16	11520161	12613098	4804	3312	1286
16	8338519	9799419	8317	5684	2242
16	17644749	18643607	2769	1824	794
16	65938566	68841363	6915	4072	1546
16	82747728	83477208	4748	3528	1341
16	25986862	27445755	6010	3947	1827
16	81772536	82747728	5630	3979	1660
16	5891580	6893551	6257	4853	2024
16	84445883	85148685	4465	3423	1441
16	83477208	84445883	6182	4776	2032
16	10426032	11520161	4961	3635	1447
16	7529121	8338519	5579	3607	1472
16	75977954	77523678	7196	4547	1505
16	22448904	24136875	5402	3195	1547
16	27445755	29036613	3329	2270	1068
16	85148685	86156599	4803	3982	1931
16	60054	1207206	5291	3991	1793
16	1207206	2764829	5852	4114	1731
16	13154437	14464002	5375	3293	1331
16	29036613	31382943	4411	3031	1263
16	31382943	46399473	5855	4129	1821
16	14464002	16154060	4076	2851	1227
16	49007926	52035823	9124	5737	2679
16	52035823	53382572	4369	2312	1039
16	80297374	81772536	7895	5479	2160
16	72935150	74971503	7510	5626	2395
16	68841363	71054028	5451	3613	1363
16	63691589	65938566	7853	4409	1729
16	16154060	17644749	4537	3127	1451
16	18643607	20150571	5179	3096	1305
16	12613098	13154437	3839	2225	861
16	46399473	49007926	4759	2570	1191
16	20150571	22448904	5480	3313	1559
16	86815411	87647349	3974	2976	1245
16	87647349	89041165	7680	5644	2325
17	32912798	34469036	5164	2860	1296
17	27334244	29786491	5339	2923	1134
17	29786491	31538425	5426	3424	1492
17	31538425	32912798	5432	3331	1501
17	57487512	59312755	3133	1846	815
17	63148128	64800430	7003	3702	1494
17	59312755	61545589	5414	3534	1522
17	77298636	78837588	6386	4439	2005
17	61545589	63148128	3632	2260	1025
17	64800430	67858770	9748	6258	2741
17	69387817	72672203	12748	9175	4304
17	53599432	55357541	5563	3125	1489
17	55357541	57487512	5737	3661	1659
17	9965921	11102815	4084	2582	1271
17	11102815	12534769	4776	3257	1446
17	13894637	15019097	5395	3281	1475
17	8306425	9965921	6156	4313	2041
17	49898957	50719055	2524	1241	464
17	5741334	7317398	6408	4640	2115
17	51826118	53599432	5897	3235	1372
17	56	1172399	6056	4494	2227
17	38877404	39899810	4415	1992	809
17	76263413	77298636	4924	3714	1736
17	43056905	45876022	9816	4647	1643
17	41772087	43056905	3529	2130	859
17	80034408	81194908	5036	3135	1259
17	78837588	80034408	5208	3469	1530
17	36809344	38877404	5286	3146	1393
17	1172399	1928731	3571	2561	1182
17	50719055	51826118	3988	1803	672
17	12534769	13180372	2981	1836	840
17	3702312	4696261	3935	2764	1269
17	39899810	41772087	4428	2635	1146
17	4696261	5741334	4418	2643	1011
17	13180372	13894637	3445	2132	1039
17	7317398	8306425	3542	2324	996
17	18856320	21290357	5593	3494	1510
17	15019097	16412342	4252	2639	1080
17	45876022	47517400	5304	2898	1176
17	21290357	27334244	8012	4749	2055
17	72672203	74375560	5722	3519	1544
17	1928731	3702312	7200	4859	2152
17	16412342	18856320	6951	4330	1725
17	34469036	36809344	5902	4137	1977
17	74375560	76263413	8310	5565	2628
17	67858770	69387817	5583	3227	1306
17	47517400	49898957	7210	5013	2309
18	59020751	60277715	4807	2785	1192
18	77149991	78017158	3932	2556	1085
18	75976317	77149991	5620	3185	1380
18	61820252	63463402	6229	3031	1180
18	60277715	61820252	4991	2603	1150
18	51062185	51554175	2596	1028	328
18	42922106	44299246	4681	2991	1258
18	45939732	47730584	6720	4136	1695
18	39892648	42922106	9284	4784	1921
18	56530220	57630483	4761	3158	1360
18	55213838	56530220	5389	3299	1427
18	44299246	45939732	5862	3440	1420
18	47730584	51062185	12343	6676	2536
18	64252801	66125817	7988	4076	1595
18	51554175	55213838	10506	5475	2222
18	63463402	64252801	3074	1333	497
18	25927682	26875587	2760	1196	459
18	14440799	19485844	4646	2635	976
18	22996651	24026191	3211	1758	706
18	37684367	39892648	7372	3407	1441
18	10644	912486	4371	2911	1380
18	71971462	73526987	5506	3320	1529
18	1942911	3891658	8646	5805	2727
18	71038474	71971462	3947	2599	1155
18	73526987	74813815	6066	3864	1798
18	5834180	7090485	4557	2988	1494
18	27866478	30264066	8069	4267	1801
18	69621618	71038474	6398	3417	1492
18	24026191	25927682	6106	3658	1655
18	26875587	27866478	3439	1584	612
18	20649472	22996651	6957	4555	1919
18	30264066	31780067	3975	1789	779
18	3891658	5834180	8143	5136	2372
18	33861964	35075250	3206	1986	852
18	31780067	33861964	5783	3081	1282
18	11075913	11905440	3451	2110	1002
18	36365490	37684367	3520	1777	667
18	7090485	8498931	5429	3203	1503
18	68621179	69621618	4555	2482	1003
18	67175820	68621179	5443	3070	1366
18	57630483	59020751	4978	2439	948
18	35075250	36365490	3863	2039	876
18	11905440	14440799	10264	5983	2450
18	19485844	20649472	3437	1899	794
18	912486	1942911	3860	2120	942
18	66125817	67175820	4037	2049	932
18	74813815	75976317	6268	3812	1697
18	8498931	11075913	11357	7166	3302
19	3019660	4348967	5867	4436	2175
19	13471127	14486347	3406	2444	1188
19	11284028	13471127	6857	3905	1734
19	9238393	11284028	7274	4131	1774
19	8347513	9238393	3574	2232	1074
19	4348967	5811852	6384	4672	2151
19	5811852	6684885	3880	2447	1151
19	2098396	3019660	4754	3383	1530
19	610729	2098396	6835	5463	2720
19	6684885	8347513	7961	5470	2536
19	54602362	55728080	6955	4778	2195
19	55728080	57521335	8170	5718	2806
19	52985290	54602362	9965	7050	3303
19	14486347	15648610	4890	3088	1409
19	80840	610729	2446	1943	1002
19	57521335	59118839	5839	3737	1493
19	40170619	40984601	2972	1625	726
19	30727954	32746520	5740	3384	1629
19	36469295	37527033	3398	1599	602
19	22732896	23467746	3417	1515	499
19	20905757	22732896	8649	3482	1229
19	16374416	18409862	8134	5376	2482
19	46102697	47150082	4405	2606	1202
19	28557893	29790947	5644	2788	1027
19	44744108	46102697	5353	3408	1582
19	47150082	49282227	7891	4940	2248
19	34262952	36469295	8025	4905	2271
19	43862455	44744108	3217	1774	789
19	29790947	30727954	3750	2254	1012
19	32746520	34262952	6300	3580	1508
19	19877471	20905757	4883	2218	809
19	18409862	19877471	4208	2684	1159
19	15648610	16374416	4320	2136	829
19	40984601	42131573	4262	2663	1193
19	42131573	43862455	5449	2867	1126
19	23467746	28557893	8678	3590	1262
19	49282227	51532567	8728	6046	2878
19	51532567	52985290	6576	3910	1796
19	37527033	40170619	8669	4937	1918
20	25344231	31614823	8772	4545	1693
20	31614823	32813441	2495	1611	687
20	40585689	41615460	3715	2409	1015
20	32813441	34960446	4772	2328	880
20	2469501	3828413	4919	3099	1410
20	41615460	42680176	3646	2335	1075
20	5477850	7084073	6330	3954	1813
20	17487232	18972203	6158	3248	1380
20	36909530	38436761	4565	2672	1058
20	7084073	8117011	3812	1925	796
20	9730921	11249536	5608	3288	1577
20	39610856	40585689	2853	1572	596
20	15958359	17487232	6584	3723	1570
20	12447499	13689864	5050	2661	1144
20	13689864	15958359	8047	4780	1940
20	60479	697600	2661	1961	1017
20	18972203	20959710	6449	3741	1665
20	11249536	12447499	4378	2255	931
20	34960446	36909530	4531	2773	1241
20	3828413	5477850	7365	4721	2082
20	24717724	25344231	2483	1100	386
20	23293790	24717724	5854	2647	1080
20	58406572	59561724	4040	2373	1068
20	52472549	54055266	6112	3659	1562
20	42680176	44839056	7108	4002	1722
20	56447959	58406572	7006	4683	2264
20	20959710	22491456	3933	1988	837
20	54055266	56447959	9949	6529	2978
20	62190180	62965163	2996	2010	896
20	44839056	47199980	8128	5480	2409
20	697600	2469501	7242	4766	2308
20	8117011	9730921	5368	3066	1361
20	38436761	39610856	3563	2317	954
20	22491456	23293790	2416	1475	625
20	61301855	62190180	4434	3094	1424
20	47199980	49239658	7141	4026	1647
20	59561724	61301855	7897	5294	2392
20	49239658	52472549	11890	7597	3319
21	31197025	32668642	5154	2352	1046
21	29125226	31197025	7214	3881	1344
21	44506268	46177105	6115	4251	1828
21	46177105	47492226	5557	3886	1537
21	47492226	48119752	3141	1801	654
21	26469122	27271019	2614	1482	530
21	24696231	26469122	7796	4137	1635
21	36524373	37870779	5511	3183	1233
21	38711704	40482902	6383	3961	1691
21	41389527	43321528	8662	5986	2651
21	27271019	29125226	7798	4851	1966
21	37870779	38711704	3224	1797	796
21	43321528	44506268	6307	3933	1711
21	40482902	41389527	4052	2317	931
21	18053165	19480375	5338	3369	1419
21	15950982	18053165	6256	4113	1894
21	34376999	35225465	2495	1658	754
21	20962339	22072764	4922	2690	1122
21	9411243	15950982	9608	6627	3885
21	32668642	34376999	6052	3724	1598
21	23362875	24696231	4840	2509	1040
21	35225465	36524373	4213	2829	1273
21	22072764	23362875	5407	3024	1259
21	19480375	20962339	6607	3749	1515
22	16050408	17674295	4613	3099	1462
22	18296088	19912358	6425	3971	1909
22	17674295	18296088	3022	1998	1020
22	19912358	22357325	6899	4500	2223
22	49824534	51243298	6317	4229	1773
22	46470495	47596318	4972	3217	1400
22	31439918	32664986	4306	2135	778
22	26791628	27834752	4843	3253	1615
22	32664986	34494914	7629	4798	2092
22	29651799	31439918	5565	3084	1210
22	39307894	40545797	3484	2397	1069
22	24984204	26791628	7613	4933	2243
22	23712647	24984204	5079	2891	1276
22	35530985	37570269	8058	4995	2228
22	22357325	23712647	6998	4641	1804
22	27834752	29651799	5427	3366	1400
22	34494914	35530985	4935	2435	899
22	40545797	42690818	5308	3079	1006
22	42690818	43714200	4507	3045	1195
22	43714200	44995308	5688	3936	1735
22	44995308	46470495	6835	4878	2156
22	37570269	39307894	5435	3585	1507
22	47596318	48903703	5858	4089	1817
22	48903703	49824534	6713	4640	2038

## Sheet: ST3d
Supplementary Table 3d: Effective number of variants within LD Blocks in EUR population with MAF greater than or equal to 0.005.
CHR	Start Position	End Position	Number of Raw Variants	Unique Variants	Effective Number of Tests
1	84844495	86454751	6485	3637	1688
1	153180829	154770403	4714	2959	1439
1	156336133	158027412	6636	3647	1839
1	151538881	153180829	5265	2741	1199
1	158027412	159913048	8181	4101	1917
1	159913048	162346721	9822	5808	2766
1	162346721	165191702	11513	6397	3093
1	154770403	156336133	3551	2270	1102
1	9365199	10806984	5007	3076	1561
1	20469149	21736588	4771	2803	1274
1	99800604	100826405	3870	1763	822
1	102898745	103914211	4238	1567	666
1	18662899	20469149	8221	4848	2409
1	102041016	102898745	4340	1735	848
1	100826405	102041016	4416	2415	1117
1	106087842	108409665	8397	4580	2139
1	103914211	106087842	9656	4224	1741
1	97885249	99800604	6997	3591	1679
1	221858231	222230220	1348	870	398
1	12779466	14891511	7859	5097	2546
1	43758457	44969183	3584	2089	943
1	71372470	71684405	1001	493	215
1	10806984	11777841	3778	2424	1205
1	74326907	76728135	8317	4024	1755
1	71684405	74326907	8418	3682	1588
1	11777841	12779466	4012	2540	1249
1	79661198	81354191	7810	3642	1454
1	38731847	40200567	5271	3226	1542
1	10583	1892607	5809	3983	1998
1	219590571	221858231	9104	4393	1957
1	96150893	97885249	6357	3140	1334
1	1892607	3582736	8008	5605	2840
1	196176201	197311514	3236	1651	674
1	113273306	114873845	5316	3230	1531
1	199239884	200137649	4128	2013	884
1	203334734	204681068	5114	3345	1636
1	34799758	37549183	8198	4990	2492
1	216243634	218705513	10168	5764	2656
1	206073265	208410364	7010	4153	2039
1	212842330	214578266	6499	3830	1813
1	76728135	79661198	11297	5710	2598
1	182755356	184595513	6754	3381	1563
1	14891511	16897730	9078	5548	2661
1	16897730	18662899	7697	5306	2823
1	3582736	4380811	3877	2420	1230
1	32438685	34799758	7066	4350	2144
1	197311514	199239884	6059	3314	1390
1	37549183	38731847	4432	2639	1292
1	214578266	216243634	6338	3444	1549
1	201589975	203334734	5891	3890	1962
1	189904130	191868930	7266	3381	1302
1	44969183	46899501	5706	2876	1263
1	111741737	113273306	6163	3656	1775
1	186810023	188759945	9123	4183	1764
1	194107442	196176201	9049	3862	1660
1	184595513	186810023	6796	3644	1615
1	181144121	182755356	6097	3448	1635
1	83991748	84844495	2946	1537	689
1	81354191	83991748	10879	6176	2748
1	108409665	110303931	6604	3707	1840
1	56413117	57021728	2489	1370	601
1	93536459	94506191	3307	1493	696
1	23920590	25516845	5656	3690	1788
1	21736588	23086883	6368	4102	1952
1	27401867	30161881	8157	4691	2233
1	69687616	71372470	5810	3138	1388
1	94506191	96150893	6023	3572	1637
1	23086883	23920590	2434	1534	727
1	86454751	88128631	6721	3323	1551
1	30161881	32438685	9296	5405	2576
1	188759945	189904130	5102	1841	761
1	110303931	111741737	5399	3396	1638
1	191868930	194107442	8236	3970	1761
1	88128631	90066303	6738	3556	1688
1	224938520	226810860	6979	3761	1682
1	242071602	244109499	8070	5045	2227
1	5913893	7247335	5375	3463	1583
1	233429284	234599434	5739	3471	1673
1	57021728	58865399	7521	4349	2045
1	90066303	91886317	6260	3652	1744
1	226810860	229156248	8898	4751	1948
1	234599434	235819436	4962	3109	1568
1	235819436	237555628	8100	5001	2352
1	229156248	230685255	5911	3734	1881
1	91886317	93536459	5892	3072	1315
1	232090252	233429284	6124	3561	1748
1	208410364	210787750	9112	5623	2623
1	230685255	232090252	5729	3426	1633
1	118839067	144977494	10907	7404	4133
1	48978188	49894177	2320	1309	605
1	49894177	51713726	4153	1867	853
1	144977494	148361253	6772	3915	2033
1	148361253	151538881	6830	4184	2161
1	247344518	249239466	8900	4993	2266
1	240564091	241582220	4644	3152	1661
1	241582220	242071602	2158	1368	703
1	237555628	238567807	5422	2848	1261
1	58865399	59890409	4125	2177	1044
1	239925314	240564091	3069	1962	916
1	65041704	66939404	6766	3546	1668
1	66939404	68477895	5989	3293	1511
1	7247335	9365199	7813	5456	2552
1	63455089	65041704	6240	3507	1718
1	41975327	43758457	6147	3211	1432
1	61922365	63455089	5937	3566	1692
1	25516845	27401867	5020	3165	1519
1	59890409	61922365	6825	3905	1946
1	40200567	41975327	6932	3896	1878
1	222230220	224938520	9283	5562	2424
1	115880593	118839067	10328	5575	2715
1	54226262	56413117	9234	5533	2614
1	170557776	173097907	9188	4855	2145
1	238567807	239925314	6440	3436	1627
1	178944309	178954470	40	30	17
1	166460517	169086324	10895	6375	3073
1	175089768	177433381	8049	4331	2015
1	178954470	181144121	9174	4407	1866
1	68477895	69687616	4461	2395	1134
1	177433381	178944309	4935	2805	1221
1	173097907	175089768	5919	2575	1025
1	204681068	206073265	5084	3070	1482
1	210787750	212842330	8729	4578	2038
1	51713726	54226262	8285	4097	1964
1	169086324	170557776	6522	2818	1140
1	244109499	245506746	6102	4222	2172
1	245506746	247344518	10371	6197	2800
1	200137649	201589975	6274	3786	1786
1	218705513	219590571	3745	1802	802
1	114873845	115880593	3709	1801	819
1	4380811	5913893	8224	5173	2495
1	46899501	48002576	4249	2255	980
1	48002576	48978188	3280	1873	881
1	165191702	166460517	5112	2965	1424
2	35345028	36122006	4242	2376	750
2	43309590	44313803	4466	2997	1151
2	38132712	39031337	4267	2799	1066
2	36122006	38132712	9782	6445	2632
2	31550450	33363777	6991	4226	1521
2	40281483	43309590	13960	9671	3547
2	33363777	35345028	10923	6740	2673
2	47318772	48213001	3902	2785	1297
2	46482634	47318772	3969	2820	1191
2	58297315	60292000	6735	4798	1915
2	57429100	58297315	3790	2171	718
2	39031337	40281483	4387	2702	1060
2	88038507	89154526	3258	1808	918
2	102688765	103588215	3300	1633	717
2	107408267	108429177	4058	1883	864
2	108429177	110572432	7769	3932	1766
2	89154526	95326452	3369	2634	1204
2	85140680	88038507	9250	5522	2508
2	81620841	85140680	13526	5153	2054
2	110572432	113921856	9002	5321	2531
2	118367466	121303783	11239	5957	2733
2	113921856	116772470	9667	5762	2429
2	124732250	125840921	4168	2263	1034
2	103588215	105125034	5162	2494	1188
2	106210058	107408267	5756	3123	1450
2	98995201	101822329	10281	5060	2081
2	78079264	80050403	8561	5009	2047
2	205799241	206735704	3284	2511	1182
2	241560084	242149921	2851	1811	869
2	233550003	235150987	6697	4212	1962
2	235150987	236043550	4844	3068	1553
2	201576284	202818637	3918	2127	972
2	212379518	214014282	7552	4485	1820
2	206735704	208645399	7035	4337	1975
2	225840004	228119842	8366	4334	2035
2	236043550	237449032	5671	3602	1720
2	215573795	217715661	8336	5320	2465
2	220454551	222521176	8274	5042	2295
2	218395480	220454551	5999	3665	1852
2	224859419	225840004	3740	2013	854
2	54685226	56203345	6903	4321	1520
2	44313803	46482634	9718	7194	3080
2	56203345	57429100	5471	3471	1200
2	52491133	53508452	5432	3348	1079
2	208645399	209941529	4669	2695	1195
2	222521176	224859419	9090	4757	2354
2	217715661	218395480	2928	1730	767
2	48213001	50022257	7917	5428	1982
2	238760981	239952643	5710	3520	1640
2	123302906	124732250	6314	2805	1192
2	53508452	54685226	5224	3294	1237
2	50022257	50818928	3356	2261	774
2	229370787	231843389	10123	5840	2796
2	105125034	106210058	4257	2558	1225
2	28598777	29217559	2325	1550	707
2	26894985	28598777	4607	2678	1081
2	24686918	26894985	7108	4360	1926
2	76913661	78079264	5994	3645	1465
2	75630086	76913661	5786	3352	1337
2	65933444	67226166	5074	3051	1411
2	231843389	233550003	6956	4227	1922
2	30463711	31550450	5142	3300	1436
2	50818928	52491133	6855	4678	1650
2	67226166	68010176	3753	2325	928
2	73174848	75630086	7857	5020	2173
2	1781022	3973779	10361	6551	3117
2	202818637	205799241	8664	5281	2321
2	237449032	238760981	6214	3759	1710
2	69139564	70755198	5230	2922	1292
2	5708337	6836254	5241	2957	1424
2	130067170	130658085	2273	1185	580
2	60292000	62429044	6888	4623	1843
2	10133	1781022	9495	5645	2424
2	70755198	73174848	8985	5475	2432
2	116772470	118367466	6865	2970	1136
2	95326452	98995201	7491	4316	1789
2	158533218	159577082	4346	2303	1004
2	154005056	155391135	5672	3332	1297
2	151731462	152486782	2997	1575	678
2	177363636	178553183	4630	2409	1059
2	144519484	146445570	4839	2910	1410
2	169968236	171226245	6030	3268	1414
2	199311125	201576284	6216	3601	1548
2	23341383	24686918	5382	2867	1260
2	130658085	133042784	8450	4915	2227
2	135158578	137042794	5070	2384	1007
2	191973357	195861164	11446	6134	2873
2	138698117	140100271	4976	2250	1113
2	164466638	165178840	1863	1154	525
2	196447456	198078110	5570	2791	1204
2	159577082	161769733	9232	4783	1960
2	157560635	158533218	2540	1492	751
2	128034347	129474441	5578	3082	1408
2	189882065	191973357	6804	3291	1456
2	137042794	138698117	7489	3594	1435
2	64625913	65933444	4994	3151	1532
2	209941529	212379518	8976	4938	1952
2	195861164	196447456	2994	1306	573
2	182266031	184357608	8191	4249	1794
2	181312739	182266031	4027	1994	825
2	68010176	69139564	4791	2623	1187
2	150210292	151731462	5340	2907	1398
2	171226245	173138905	7429	4450	1902
2	175588929	177363636	6061	3434	1543
2	127373764	128034347	3099	1748	848
2	3973779	5708337	7477	4443	2161
2	198078110	199311125	3287	1664	724
2	140100271	141805351	8088	3833	1566
2	152486782	154005056	5563	3078	1256
2	167160270	167355970	766	442	204
2	146445570	147277162	2573	1330	610
2	161769733	163503551	4790	2275	1086
2	125840921	127373764	6281	2462	1027
2	142518602	144519484	7422	3956	1741
2	29217559	30463711	5108	3426	1506
2	185280173	189882065	15530	7072	2644
2	10298469	12419150	10380	6677	3274
2	8422147	10298469	7429	4896	2336
2	133042784	135158578	7991	5256	2408
2	18647423	19692404	3917	2217	999
2	19692404	21050490	5722	3614	1707
2	21050490	23341383	7483	4522	2031
2	12419150	14335308	8192	4313	1952
2	167355970	169968236	10670	5856	2509
2	129474441	130067170	2341	1156	560
2	14335308	16329735	7805	4624	2106
2	16329735	18647423	9648	5134	2395
2	178553183	181312739	11206	6069	2531
2	141805351	142518602	3910	2118	784
2	165178840	167160270	6280	3564	1534
2	101822329	102688765	3042	1687	763
2	80050403	81620841	5676	3622	1554
2	121303783	123302906	7103	3979	1891
2	6836254	8422147	5970	3612	1882
2	242149921	243188920	4463	2773	1183
2	228119842	229370787	6391	3234	1500
2	214014282	215573795	6175	3253	1267
2	239952643	241560084	8412	5416	2682
2	147277162	150210292	8222	4284	1970
2	155391135	157560635	7151	3797	1547
2	163503551	164466638	3419	1588	759
2	184357608	185280173	3922	1849	695
2	62429044	64625913	6951	4334	1638
2	173138905	175588929	9610	5827	2767
3	163253205	165055469	6785	2687	1034
3	19125144	20091348	2745	1671	752
3	17891118	19125144	4066	2218	1025
3	16282442	17891118	6277	3202	1361
3	197075987	197946622	3636	2268	1113
3	194786674	195971408	6454	4541	2089
3	195971408	197075987	4654	3053	1455
3	170964909	172295731	5275	3366	1654
3	194059671	194786674	4511	2898	1407
3	178107165	179374586	4613	2614	1144
3	137371083	139954597	7975	4542	2053
3	128194861	130244735	7717	4131	1814
3	157312028	159477890	7785	3556	1474
3	167117429	168580960	4454	2417	1155
3	131836516	133252173	5736	2774	1213
3	145664619	146726629	4763	2195	940
3	154714218	156008700	4891	2364	1066
3	153256571	154714218	5608	2446	1068
3	135456906	137371083	5490	2981	1139
3	156008700	157312028	4739	2235	981
3	159477890	161524504	7255	3181	1354
3	149043237	150252004	4751	2782	1336
3	161524504	163253205	9201	3242	1204
3	84367479	85582231	4850	2001	741
3	141339097	143164628	6825	3849	1778
3	151348730	153256571	7312	3874	1693
3	176320287	178107165	7015	4067	1928
3	143164628	144410816	5009	2310	1071
3	69276762	70449028	4580	2835	1174
3	54081390	55348860	5170	3804	1696
3	75704949	77508835	7237	4274	1777
3	13070799	14816900	7658	4941	2338
3	63669286	65273538	6859	4781	1982
3	51832015	54081390	6361	3871	1697
3	79024541	81427310	8528	3648	1437
3	60272906	62355666	9462	6313	2831
3	55348860	56433907	4300	2431	1019
3	144410816	145664619	5602	2502	1074
3	49316972	51832015	5497	2580	1049
3	74321817	75704949	6361	3350	1272
3	165055469	167117429	9372	3496	1363
3	133252173	135456906	7794	4829	2214
3	146726629	149043237	8969	4786	2290
3	65273538	66270447	3856	2783	1240
3	66270447	68286914	8357	5225	2108
3	6083183	7083387	5374	3437	1522
3	46657500	47727212	2443	1322	596
3	7083387	8648561	7677	4918	2026
3	47727212	49316972	2919	1602	718
3	32351715	33255592	4401	2469	1149
3	35283458	36486842	4838	2651	1088
3	42540002	45165153	7590	4122	1851
3	150252004	151348730	3935	2525	1161
3	29142260	30717955	7604	4649	2093
3	27840910	29142260	4604	2972	1232
3	14816900	16282442	5692	3243	1468
3	77508835	79024541	5099	2738	1168
3	72529329	74321817	7215	4865	2180
3	60157	1441779	7004	5088	2244
3	36486842	38356116	6075	3478	1578
3	41064528	42540002	5938	3241	1351
3	168580960	170964909	8605	4872	2217
3	8648561	9543183	3990	2904	1452
3	62355666	63669286	6034	3751	1728
3	38356116	40221298	7465	3742	1692
3	2992120	4431647	8023	5353	2342
3	82643886	84367479	5960	2730	1004
3	33255592	35283458	7330	4209	1643
3	188856214	190226607	6895	4048	1805
3	45165153	46657500	6171	3131	1290
3	56433907	58157519	6511	3494	1401
3	113947863	115447080	4569	2640	1306
3	185068255	186890344	6680	4523	2276
3	30717955	32351715	6741	4132	1893
3	126214943	128194861	7016	3769	1673
3	58157519	60272906	9189	5641	2460
3	186890344	188856214	7735	4886	2507
3	100592217	103084960	8968	4224	1731
3	121974097	123517768	5712	3100	1508
3	112815699	113947863	4163	2168	998
3	106982811	109522395	9125	4835	2120
3	104581613	106982811	10206	5074	2251
3	1441779	2992120	9933	7061	3028
3	118530251	120523055	7749	3823	1702
3	120523055	121974097	5582	2211	933
3	115447080	116800153	5334	3183	1351
3	25461558	26877769	5738	3001	1290
3	192343814	194059671	7447	4497	2179
3	95311971	98215950	10530	4661	1758
3	81427310	82643886	3931	1962	822
3	123517768	124936642	6043	3453	1526
3	88298373	94255316	9901	4623	1709
3	94255316	95311971	4477	1837	674
3	116800153	118530251	6825	3988	1645
3	183769683	185068255	4864	3125	1552
3	87409732	88298373	3247	1464	591
3	40221298	41064528	2428	1329	641
3	181511166	183769683	7404	4397	2139
3	103084960	104581613	7054	3085	1290
3	110513770	112815699	9381	4445	1964
3	21643707	22204244	3824	2461	1030
3	11019665	13070799	8150	5087	2319
3	26877769	27840910	4386	2194	848
3	20091348	21643707	8097	4709	1824
3	99373762	100592217	4418	1874	762
3	98215950	99373762	5368	2358	969
3	190226607	192343814	10358	5425	2462
3	23804865	25461558	7570	5130	2100
3	139954597	141339097	4886	2918	1318
3	22204244	23804865	7055	4301	1597
3	9543183	11019665	6059	4082	1954
3	85582231	87409732	7609	3101	1224
3	68286914	69276762	4083	2574	989
3	70449028	72529329	7238	5416	2559
3	4431647	6083183	8734	6432	2940
3	109522395	110513770	3860	1706	718
3	124936642	126214943	6566	3355	1326
3	179374586	181511166	6417	3618	1594
3	130244735	131836516	5949	3083	1240
3	172295731	173477285	4237	2696	1268
3	175116539	176320287	5035	2626	1198
3	173477285	175116539	7308	4560	1859
4	48123600	53877433	8606	5181	2500
4	43965045	45189157	5612	2297	988
4	42213058	43965045	8269	3653	1493
4	694715	1478711	3799	2278	942
4	154477641	155056126	2541	1480	693
4	157485097	158743718	5023	2498	1088
4	146178187	148521873	7802	4201	1943
4	150683580	152782184	6834	3373	1407
4	20544557	22319347	7973	4261	1838
4	152782184	154477641	6639	3875	1878
4	155056126	157485097	10241	5484	2452
4	161826435	163243679	7306	3367	1411
4	10240	694715	2800	1403	626
4	158743718	161058864	8061	4212	1740
4	7539692	8152235	3726	2822	1342
4	29762208	30454535	3578	1612	754
4	58935008	60741087	8703	3932	1580
4	60741087	62371763	7925	3386	1523
4	167852917	169676825	7956	4206	1791
4	27965868	29762208	8411	3961	1599
4	139556511	141084631	5424	3433	1707
4	141084631	143443265	8377	4404	2022
4	167018858	167852917	3981	1709	709
4	143443265	146178187	8904	4266	1743
4	47411896	48123600	2541	1330	607
4	40202609	42213058	8613	5168	2483
4	138541971	139556511	4298	2293	972
4	17383322	18841874	5920	2870	1253
4	169676825	170776510	3699	2111	978
4	38907022	40202609	5357	3005	1316
4	164478234	165823448	6815	3648	1533
4	12323034	14272001	9229	5072	2117
4	10699152	12323034	8260	4829	1974
4	14272001	15147446	4311	2444	1038
4	189693511	191043594	7667	4634	2179
4	170776510	172558635	8372	3441	1357
4	174264132	176570716	9642	5269	2534
4	180122043	182066807	10523	6483	2858
4	22319347	24135529	6794	4088	1845
4	118479918	119933512	5775	2651	1059
4	127830293	128996665	3097	1634	638
4	131283821	132954033	6814	3412	1342
4	15927009	17383322	6199	3983	1807
4	125210862	126480886	5441	2731	1211
4	136566407	138541971	8660	4188	1910
4	111256567	113870102	8923	4855	2086
4	130591885	131283821	3051	1438	622
4	184929455	186909090	9933	6976	3327
4	115666246	117276929	6549	2630	1101
4	113870102	115666246	7146	3883	1713
4	117276929	118479918	5582	2469	1026
4	119933512	120392684	2531	1143	434
4	176570716	178991910	10621	5995	2776
4	120392684	122657987	10401	4812	2083
4	186909090	188472981	7832	5265	2499
4	45189157	47411896	7240	3659	1607
4	163243679	164478234	5227	2524	1160
4	183371275	184929455	7884	5308	2611
4	132954033	134628434	8118	2992	1286
4	68854765	71049152	11112	4697	1855
4	126480886	127275477	3504	1927	813
4	122657987	124286481	6045	2633	1079
4	15147446	15927009	2964	1629	709
4	24135529	25609322	6128	3804	1870
4	68059497	68854765	3248	1491	718
4	74592390	77130707	9790	4565	2090
4	77130707	79093979	7769	3994	1813
4	128996665	130591885	5711	3150	1445
4	72140558	74592390	8771	3683	1673
4	56547644	58935008	11205	6133	2747
4	127275477	127830293	2714	1464	561
4	161058864	161826435	3832	2210	862
4	9326479	10699152	8532	4395	1461
4	37255047	38907022	8117	4849	2205
4	62371763	64341001	8497	4122	1745
4	36020436	37255047	5691	2609	1084
4	80990297	82125315	4219	1856	859
4	83372593	84799656	5573	3111	1467
4	82125315	83372593	4898	2713	1202
4	87534648	89238028	6898	3567	1536
4	134628434	136566407	7054	3385	1359
4	18841874	20544557	7443	3399	1446
4	84799656	86930609	7480	3508	1586
4	188472981	189693511	7880	4951	2298
4	66600492	68059497	5890	2766	1196
4	165823448	167018858	5406	2977	1341
4	55429556	56547644	5026	2512	1157
4	90231564	91560677	5107	2267	1018
4	53877433	55429556	5774	3214	1438
4	86930609	87534648	2232	885	414
4	107501305	108815348	4502	2248	1085
4	30454535	31782981	6086	3203	1412
4	99424067	100678360	5644	2487	1144
4	33172766	35151415	7418	2809	1221
4	79093979	80990297	6759	3224	1425
4	100678360	103221356	10053	5189	2165
4	1478711	2842979	5493	3704	1640
4	71049152	72140558	4583	1837	831
4	31782981	33172766	7042	3083	1275
4	64341001	66600492	9978	4463	1814
4	91560677	94233299	9570	4812	1927
4	6773043	7539692	4520	3434	1658
4	4684116	5502388	4848	2969	1338
4	25609322	27343722	6025	4028	2004
4	89238028	90231564	3636	2054	965
4	27343722	27965868	3114	1589	704
4	108815348	111256567	9283	4977	2338
4	96182188	97540703	5971	2995	1268
4	97540703	99424067	6630	2769	1072
4	2842979	3846040	4843	3432	1540
4	103221356	105305294	6934	3576	1493
4	178991910	180122043	5445	2805	1250
4	172558635	174264132	5646	2973	1373
4	182066807	183371275	6793	4887	2267
4	124286481	125210862	3557	1781	810
4	148521873	150683580	6692	3694	1679
4	3846040	4684116	5636	3795	1652
4	5502388	6773043	7015	5304	2613
4	105305294	107501305	7675	3734	1631
4	94233299	96182188	7906	4343	1755
4	8152235	9326479	6525	4134	1967
4	35151415	36020436	4782	1930	836
5	113396285	114830370	6085	3529	1286
5	129519025	132139649	7190	3318	1245
5	117346213	118608820	5629	3305	1328
5	125785649	127344604	6165	3100	1407
5	142981248	144943354	7153	3517	1411
5	144943354	147181998	7576	4246	2046
5	111981562	113396285	7000	3806	1405
5	108633934	110821144	8492	4713	1921
5	120452166	122556905	8920	4806	1939
5	150561298	152867774	9127	4547	1918
5	119669042	120452166	3851	1922	715
5	147181998	148662624	5779	2963	1408
5	140645971	142981248	9025	5582	2722
5	123798100	125785649	9031	5639	2329
5	33500180	35048970	6636	3429	1586
5	38802410	40287729	6298	3048	1266
5	139265072	140645971	3694	2029	907
5	110821144	111981562	5114	2866	1127
5	104851483	105893055	3296	2013	757
5	95963519	97315601	6663	2576	1114
5	103320005	104851483	5889	3261	1208
5	105893055	107264196	5700	3734	1514
5	101578769	103320005	6744	3160	1317
5	97315601	99260992	7880	3721	1459
5	134777401	136376050	5895	3027	1326
5	107264196	108633934	5776	3081	1098
5	152867774	153773088	3823	1820	793
5	35048970	36433954	5173	2597	1147
5	127344604	129519025	8548	3785	1516
5	132139649	134777401	8532	5476	2644
5	156628700	158825698	8173	4412	1942
5	168525318	169505664	4197	2453	1187
5	172678327	173642871	4236	2601	1305
5	175450595	177251507	5973	3521	1735
5	169505664	171074292	5989	3811	1926
5	155373505	156628700	4571	2574	1060
5	171074292	172678327	6470	4185	2129
5	166847740	168525318	6311	4560	2196
5	173642871	175450595	7577	5274	2712
5	85767290	87389991	4864	2573	1097
5	87389991	88891530	3500	1868	884
5	26857604	27984513	3992	2135	965
5	27984513	29714820	7885	3505	1489
5	153773088	155373505	6251	3417	1547
5	99260992	101578769	9264	4124	1531
5	91840542	93809984	4589	2586	1258
5	122556905	123798100	4536	2857	1156
5	114830370	115831047	5249	2874	1123
5	90422654	91840542	3958	2157	975
5	118608820	119669042	4545	2633	1001
5	75798866	77623332	7313	4384	2035
5	88891530	90422654	4341	2572	1155
5	82025648	83972689	6094	3861	1861
5	177251507	178413464	6412	4178	1946
5	93809984	95963519	6855	4230	1922
5	115831047	117346213	7480	4409	1915
5	982252	2132442	6865	4943	2401
5	29714820	31390249	7798	3770	1655
5	31390249	33500180	9122	5440	2659
5	161482133	162743908	4732	2648	1175
5	165642395	166847740	4222	3078	1378
5	178413464	179401244	4438	3103	1545
5	159973944	161482133	5825	2793	1254
5	36433954	38802410	8241	4651	2118
5	136376050	139265072	7506	4369	1944
5	162743908	163771582	4175	2558	1106
5	11940	982252	5248	3401	1505
5	163771582	165642395	6663	4553	1900
5	2132442	3361941	7652	4791	2373
5	67850860	71240456	5740	3417	1587
5	13464832	14757804	4819	2931	1330
5	3361941	4632110	5616	3220	1618
5	57340073	58524622	5171	2924	1249
5	50163398	52134622	7202	3680	1470
5	53703044	55417349	7138	3614	1578
5	9718832	11173271	6491	4188	2000
5	11173271	13464832	8752	4831	1870
5	14757804	16963613	8280	4870	2256
5	179401244	180559933	6041	3807	1851
5	52134622	53703044	6765	3514	1532
5	43983499	50163398	10667	4724	1672
5	61672995	63218987	6033	2900	1175
5	16963613	18051592	4246	2502	1260
5	41888710	43983499	7351	3225	1264
5	83972689	85767290	9041	3998	1513
5	18051592	19917716	8344	4139	1680
5	8446336	9718832	6114	3298	1538
5	180559933	180885156	981	615	293
5	40287729	41888710	6144	2779	1184
5	23494324	26184851	11572	5383	2298
5	63968304	65911286	6689	3347	1538
5	63218987	63968304	2049	1136	475
5	5973233	7143218	5402	3160	1502
5	60935907	61672995	2260	1261	594
5	7143218	8446336	6339	3375	1462
5	26184851	26857604	3202	1425	645
5	65911286	67850860	7701	4622	2094
5	73759326	75798866	7646	4256	1863
5	22152073	23494324	5390	2673	1179
5	158825698	159973944	4783	2836	1391
5	58524622	60935907	7570	4026	1637
5	55417349	56621102	5042	2946	1480
5	77623332	79393144	6545	3965	1849
5	79393144	80481471	4735	2894	1236
5	80481471	82025648	5078	3259	1389
5	148662624	150561298	7134	4431	2147
5	56621102	57340073	2751	1422	721
5	19917716	22152073	8267	4101	1795
5	4632110	5973233	6418	3792	1915
5	71240456	73759326	8761	5025	2313
6	168042835	169382050	8024	4818	2214
6	169382050	170330173	4265	2335	1011
6	10540317	11790816	5477	3239	1547
6	170330173	171051270	3260	2117	1010
6	7808936	9020026	5453	3026	1295
6	162169564	162931203	3579	2444	1048
6	6785207	7808936	5145	3436	1609
6	165586864	167024733	6953	4594	2122
6	9020026	10540317	6871	3901	1871
6	97093511	97842284	2783	1294	601
6	75462003	77414881	6392	3073	1392
6	87069500	88822140	7031	3398	1421
6	39295677	40345115	4412	2277	1006
6	52210476	53279102	4648	2575	1230
6	25684587	26791233	4860	2221	876
6	32682664	33236497	7127	2977	938
6	48391125	50386145	7434	3087	1249
6	67329215	68849483	8321	3325	1362
6	40345115	42038721	7055	4260	2064
6	55468270	56105313	2931	1216	546
6	37572596	39295677	7321	4200	1901
6	53279102	55468270	9979	4536	1911
6	35455756	37572596	8372	5201	2412
6	56105313	57599465	5247	2914	1399
6	29737971	30798168	12919	4500	1162
6	81929222	83127149	4583	2282	975
6	30798168	31571218	14015	6123	1530
6	43756169	45406563	6997	4034	1833
6	65765742	67329215	8505	3495	1328
6	89973052	91843196	6669	4162	1991
6	94118142	94441175	990	483	238
6	93428644	94118142	3349	1614	781
6	68849483	69523448	3448	1441	633
6	88822140	89973052	4574	2462	1132
6	164383521	165586864	5975	3214	1441
6	61880512	63552888	7969	2821	913
6	50386145	52210476	7313	3443	1445
6	31571218	32682664	20555	13722	3049
6	1452362	2458936	4263	2483	1282
6	73924	1452362	6554	4477	2367
6	108464380	110304247	6513	3089	1409
6	94441175	97093511	10081	4438	1992
6	26791233	28017819	4838	2111	731
6	117672972	118963115	4782	2204	950
6	116131396	117672972	5869	2677	1144
6	57599465	61880512	5584	2118	706
6	33236497	35455756	10054	5295	2257
6	77414881	78957728	6861	2930	1085
6	100630146	102636772	7615	3589	1555
6	42038721	43756169	5981	3578	1783
6	5791472	6785207	5132	3321	1614
6	45406563	47311898	6842	3914	1937
6	97842284	100630146	9405	4873	2217
6	47311898	48391125	4112	1929	842
6	73450097	75462003	9010	4147	1802
6	63552888	65765742	8632	3741	1517
6	162931203	164383521	6488	3799	1658
6	91843196	93428644	6187	3200	1421
6	167024733	168042835	5313	3211	1439
6	78957728	80691170	7223	3277	1383
6	28917608	29737971	5251	1847	623
6	102636772	103983395	5956	2571	1023
6	85209989	87069500	7746	3198	1294
6	114220833	116131396	7053	3215	1315
6	28017819	28917608	4328	1492	536
6	83127149	85209989	6948	3268	1435
6	119963278	120512128	2552	1049	423
6	118963115	119963278	4177	1898	792
6	125424383	127540461	5532	3107	1407
6	127540461	129861031	7791	3916	1811
6	69523448	71609510	8532	4039	1685
6	80691170	81929222	6154	2297	816
6	121905676	123856181	7523	3662	1601
6	3573593	4617817	4996	3070	1368
6	123856181	125424383	6029	3965	1854
6	130935454	132765669	6945	3752	1690
6	142288479	145319810	9864	5712	2652
6	137614218	138822629	4978	2844	1413
6	139845436	142288479	7391	3772	1517
6	153094496	154974120	8719	4511	2077
6	148920352	150253404	5171	2951	1305
6	158218719	160580497	10895	5785	2629
6	4617817	5791472	5306	3355	1615
6	138822629	139845436	4377	2654	1301
6	129861031	130935454	5140	2744	1268
6	112345014	114220833	6039	3184	1520
6	71609510	73450097	7964	3625	1519
6	132765669	134244243	5814	3138	1418
6	134244243	136224177	7109	4141	1967
6	146665424	148920352	8668	5540	2478
6	24852275	25684587	4202	2394	1038
6	21684065	22748307	5136	3210	1443
6	103983395	106056733	7972	4225	1868
6	11790816	13209388	5410	3302	1550
6	151912703	153094496	5022	2862	1369
6	154974120	156763326	7629	4894	2282
6	2458936	3573593	5578	3525	1694
6	23936619	24852275	4931	2794	1227
6	107450306	108464380	3625	2101	1018
6	17386405	19207487	8511	4237	1760
6	13209388	14802924	5933	3868	1825
6	156763326	158218719	5144	3297	1646
6	22748307	23936619	5753	3574	1525
6	14802924	17386405	10382	6564	3045
6	136224177	137614218	3874	2433	1249
6	110304247	112345014	7614	3787	1677
6	120512128	121905676	6374	2681	1009
6	145319810	146665424	4304	1828	738
6	19207487	21684065	10261	6471	2884
6	160580497	162169564	7123	4264	1878
6	106056733	107450306	6121	3587	1749
6	150253404	151912703	8458	5293	2479
7	19481547	20124908	4211	2215	878
7	4573428	5416232	4686	3457	1533
7	76458564	78093859	7085	4207	1767
7	73334602	76458564	8785	5625	2689
7	1353067	2062398	3647	2513	1066
7	79888069	82022686	8021	4739	2204
7	6573857	7808752	7424	4639	1913
7	53176312	54222976	6111	2537	966
7	54222976	55691584	7647	3417	1460
7	51675322	53176312	8653	3912	1618
7	16902069	19481547	10006	7278	3201
7	63307359	63641125	1513	626	283
7	71874885	73334602	3637	2285	1094
7	2062398	2772227	3735	2674	1194
7	63641125	65689809	8491	3890	1413
7	2772227	4573428	10550	7366	2958
7	7808752	9123423	7553	5150	2254
7	9123423	9987499	5173	3249	1284
7	16161	972752	6235	4454	2182
7	65689809	68234074	13627	6518	2669
7	69085364	71874885	10502	5979	2642
7	25077259	25909555	3661	2239	1063
7	57382638	63307359	9409	5558	1947
7	972752	1353067	2550	1649	706
7	15143657	16902069	8055	5408	2170
7	156065250	157634597	8481	5142	2359
7	157634597	159128575	7829	4978	2281
7	23471442	25077259	7124	4211	1699
7	96073508	97099570	3652	1984	917
7	112618684	113712387	3604	1841	793
7	139933177	140235210	1550	983	524
7	124167552	126519170	9625	4432	1667
7	126869221	128778386	6921	3712	1617
7	83801203	85572182	5916	2785	1145
7	104159525	105682905	5340	3526	1635
7	92493752	93966601	4740	2707	1359
7	97099570	98715474	6794	3714	1696
7	107780178	109647594	7325	3894	1558
7	132805848	134307596	5006	2574	1004
7	82022686	83801203	7618	4018	1717
7	116780178	118351581	4912	2322	970
7	134307596	135591083	5011	2764	1264
7	109647594	112618684	9854	6189	2547
7	85572182	87825004	7349	3365	1406
7	5854526	6573857	3631	2396	1044
7	126519170	126869221	1123	654	309
7	36213538	37555184	5564	3636	1725
7	103197510	104159525	4654	2668	1053
7	98715474	100196651	3789	2071	926
7	121933630	124156805	7971	3976	1677
7	100196651	101199253	4769	2775	1290
7	42001811	43159074	4734	2416	1172
7	11299198	12635461	7917	4759	1754
7	136876562	138744679	7272	4990	2362
7	90661784	92493752	4801	2825	1320
7	39862670	42001811	6665	3793	1806
7	138744679	139933177	4089	2478	1253
7	44763828	45952922	5047	2812	1299
7	118351581	121045273	7874	3560	1499
7	113712387	116780178	9084	4754	2222
7	130422414	132805848	8740	5848	2880
7	37555184	38966703	6907	3678	1602
7	101199253	103197510	6343	3723	1664
7	68234074	69085364	3861	2125	1019
7	33555768	36213538	10756	5848	2604
7	121045273	121933630	3288	1620	742
7	140235210	141226557	2861	1632	787
7	105682905	107780178	7500	4821	2170
7	93966601	96073508	6669	3722	1611
7	45952922	46986720	4793	2269	1017
7	43159074	44763828	5645	3274	1475
7	135591083	136876562	5448	2890	1292
7	46986720	49212278	10185	5217	2365
7	28360309	31137289	11452	7453	3498
7	31137289	33555768	11124	6002	2421
7	38966703	39862670	3309	1793	792
7	25909555	28360309	9444	5299	2308
7	22507629	23471442	3790	2324	970
7	149840658	150711505	4057	2145	981
7	150711505	152249806	5559	3952	2062
7	147815318	149840658	8732	5702	2635
7	20124908	22507629	11081	7831	3325
7	144968289	146427960	6213	3063	1285
7	153674019	154964730	6198	4327	2108
7	141226557	142656310	5087	2653	1302
7	154964730	156065250	6129	4161	2185
7	87825004	90661784	11722	5659	2174
7	55691584	57382638	7905	3948	1582
7	124156805	124167552	45	32	17
7	128778386	130422414	5709	3433	1578
7	152249806	153674019	7675	4780	2342
7	13884202	15143657	5964	4176	1797
7	5416232	5854526	2349	1559	735
7	142656310	144968289	6718	3672	1800
7	146427960	147815318	6758	3867	1549
7	78093859	79888069	7152	3826	1739
7	49212278	51675322	9688	4965	2189
7	12635461	13884202	7545	4630	1793
7	9987499	11299198	6751	3923	1407
8	20060856	21661737	7494	5115	2176
8	13491775	13944992	4277	2651	865
8	11278998	13491775	12067	8298	3454
8	1044217	1163245	1205	803	332
8	108648177	109248173	2397	1054	503
8	104123306	104988752	3768	1447	608
8	104988752	107410754	8530	4731	2035
8	96534806	99401581	10252	6411	2972
8	101620958	104123306	10238	6302	3066
8	28162392	29327896	3600	2289	1109
8	24674718	25483454	3244	1848	849
8	21661737	22897057	4707	3431	1606
8	85955619	87411709	3473	1738	792
8	25483454	26682525	5737	3485	1637
8	17836399	19492840	9888	6877	2823
8	22897057	24674718	7720	4470	2010
8	26682525	28162392	6809	3583	1603
8	2573279	3392926	7423	5032	2030
8	82693739	84225589	6481	2694	1180
8	19492840	20060856	2983	2033	885
8	3392926	3783017	4438	3133	1193
8	99401581	101620958	5591	3036	1285
8	31133729	31548360	1855	983	441
8	3783017	4480476	6998	5386	2213
8	29327896	31133729	6478	3781	1813
8	84225589	85955619	6830	2802	1189
8	109248173	110484314	4653	1956	879
8	131639625	133351144	8092	4087	1845
8	133351144	134570001	5236	3350	1595
8	143044914	144236881	6120	3639	1578
8	136035605	137524151	5822	3245	1395
8	137524151	139254830	8110	4297	1805
8	134570001	136035605	7039	4206	1906
8	139254830	140725643	6602	4276	1985
8	2042942	2573279	4686	3237	1397
8	17387876	17836399	3400	2187	849
8	140725643	143044914	8969	6185	2947
8	81956395	82693739	2568	1377	684
8	107410754	108648177	4728	2248	1005
8	69863057	70867979	3997	2456	1224
8	54418044	55945581	5263	2694	1240
8	55945581	56956383	4154	2049	957
8	35317232	37379389	4784	2702	1336
8	38938806	40703337	7667	3888	1666
8	42773823	46841315	3775	1868	810
8	89085481	90638162	5872	2845	1103
8	130381139	131639625	5053	2838	1192
8	128659111	130381139	6871	3933	1809
8	126410917	128659111	9302	5831	2823
8	93554386	95005527	4191	2467	1149
8	66489090	69863057	11663	6005	2754
8	116096495	119685457	10857	6393	3060
8	70867979	72289454	4715	2479	1090
8	95005527	96534806	6645	3678	1609
8	90638162	93554386	8596	4456	1894
8	65232872	66489090	4018	2063	1012
8	62329099	63349306	4201	1861	803
8	7153079	9154694	7584	5406	2440
8	63349306	65232872	6390	3142	1287
8	53302930	54418044	4770	2332	971
8	125683719	126410917	2946	1739	830
8	32977218	35317232	8737	3568	1579
8	31548360	32977218	5273	2870	1226
8	113064320	116096495	12186	4688	1806
8	50082470	53302930	12861	5478	2333
8	121201700	124861459	13246	7652	3682
8	59728100	62329099	9357	4904	2132
8	119685457	121201700	6226	2956	1235
8	10463197	11278998	3940	2935	1144
8	9154694	9640787	2613	1673	612
8	46841315	50082470	8745	4346	1683
8	59068651	59728100	2873	1455	649
8	40703337	41721454	4434	2604	1185
8	9640787	10463197	4617	3427	1256
8	41721454	42773823	3264	1856	878
8	79132861	81956395	9920	5285	2420
8	87411709	89085481	6193	3378	1329
8	37379389	38938806	4147	2776	1504
8	75445064	76456542	4238	1988	921
8	144236881	146303867	6574	4584	2123
8	6142797	7153079	7148	5023	2267
8	73817199	75445064	6194	3490	1698
8	76456542	79132861	10430	4356	1847
8	72289454	73817199	6490	3543	1656
8	110484314	111850847	3999	1839	881
8	10422	1044217	5722	4314	1720
8	111850847	113064320	3262	1492	632
8	56956383	59068651	8868	4267	1938
8	124861459	125683719	3364	1950	904
8	1163245	2042942	6111	4791	2192
8	15991660	17387876	7763	5230	2175
8	13944992	15991660	13951	9136	3191
8	4480476	5146927	5534	3887	1501
8	5146927	6142797	8926	6064	2249
9	129059665	130055510	3275	2076	1019
9	132165470	133223217	4702	2778	1395
9	133223217	134127888	3856	2696	1390
9	139500342	141144796	5965	4390	2187
9	33578334	34642243	4005	1942	800
9	34642243	36743283	6494	4083	1869
9	3190064	4495328	6033	4623	2112
9	130055510	132165470	6357	4055	2034
9	6557589	7154923	3579	2428	951
9	25330810	26111757	3417	2420	1076
9	28224283	28811584	2885	1782	809
9	8456299	9166403	3973	2689	1198
9	104624437	105967976	7383	3704	1472
9	110695062	112778024	9413	5608	2324
9	105967976	107581749	7482	3470	1387
9	107581749	109298754	7037	4065	1866
9	12276489	14836363	12003	8611	3787
9	101592859	104624437	10580	5575	2386
9	18661051	20463534	8081	5838	2493
9	10879253	12276489	7740	4539	1417
9	92528698	94167203	6930	3779	1726
9	90136246	92528698	10349	5906	2722
9	98922040	101592859	9647	5383	2392
9	20463534	22206559	6761	4580	1822
9	7154923	8456299	7541	5276	2143
9	26111757	28224283	9556	6364	2643
9	109298754	110695062	5817	3655	1792
9	88109333	88590417	1537	762	388
9	36743283	38641599	7110	4391	2120
9	112778024	114831082	9450	5551	2449
9	1079707	1916877	5206	3640	1457
9	96671698	98922040	8561	4610	1975
9	94167203	96671698	10841	5428	2199
9	31310383	32019368	3609	1433	603
9	28811584	30387392	7698	3653	1366
9	86938196	88109333	4902	2566	1185
9	126971887	129059665	6424	3832	1667
9	85440801	86938196	5863	3631	1594
9	9166403	10879253	9639	6640	2637
9	135298842	137041122	8622	5769	2731
9	137041122	137589364	2479	1781	941
9	16659655	18661051	10115	6427	2442
9	88590417	90136246	6118	3627	1699
9	117019801	117921960	3692	2415	1093
9	117921960	121321537	13074	7611	3305
9	122260297	124871322	8158	4961	2226
9	72512711	72753755	840	483	232
9	124871322	126971887	7629	4558	2114
9	115693145	117019801	5507	3483	1708
9	137589364	138938978	7551	5479	2841
9	138938978	139500342	2647	1887	930
9	121321537	122260297	3011	1948	923
9	78900183	79471208	2693	1829	856
9	79471208	81079055	6568	3835	1654
9	32019368	33578334	6909	3757	1693
9	76973081	78900183	8170	5092	2433
9	10023	1079707	6653	4829	1945
9	72753755	74253040	5862	3151	1357
9	114831082	115693145	3259	1719	752
9	84211233	85440801	3766	2419	1143
9	4884926	6557589	6275	4423	1737
9	38641599	65472190	8170	6037	3226
9	81079055	82590928	5642	3856	1796
9	74253040	76203946	6882	3616	1623
9	24158518	25330810	5685	3240	1339
9	30387392	31310383	4559	2117	779
9	22206559	24158518	8264	5555	2336
9	65472190	72512711	10983	7520	3888
9	134127888	135298842	4348	2783	1367
9	76203946	76973081	2569	1321	604
9	14836363	16659655	8149	5612	2264
9	4495328	4884926	2145	1507	748
9	82590928	84211233	8241	4394	1709
9	1916877	3190064	6762	5149	2275
10	134494673	135523865	5756	3576	1750
10	108726686	110317705	7654	4044	1553
10	120591353	122407323	7418	4456	2067
10	110317705	112561493	8375	4408	1868
10	112561493	115328432	9997	6410	2950
10	123900545	125869346	8683	5554	2582
10	60523	751339	2396	1605	668
10	116421406	119523934	10731	6308	2870
10	3352699	4572274	5624	3538	1695
10	751339	1523544	4065	2693	1207
10	100241302	100668400	1736	833	342
10	125869346	128001098	8943	5722	2581
10	2254500	3352699	6817	4224	1998
10	100668400	102949239	7933	4408	2009
10	130844284	131741327	4249	2582	1269
10	1523544	2254500	4412	2637	1285
10	4572274	5983762	8394	4935	2179
10	5983762	7171484	6682	4777	2353
10	123231465	123900545	3185	1982	939
10	115328432	116421406	3965	2539	1218
10	119523934	120591353	4170	2431	1177
10	131741327	132580245	4434	2406	1132
10	97822357	100241302	8459	5328	2584
10	95396368	96221243	2621	1563	715
10	93335047	95396368	7924	4141	1803
10	33707968	35109355	5075	3150	1416
10	67549615	69900148	11193	4897	1997
10	18537267	19716878	6421	3738	1399
10	55103572	57031140	9791	5254	2015
10	8774665	10249396	6227	3606	1504
10	60289987	61891409	5691	3307	1542
10	30458838	31907519	5477	3269	1459
10	58959528	60289987	6482	2585	1075
10	29783692	30458838	3235	2109	1005
10	23175132	25578596	8645	5231	2409
10	7171484	8774665	8323	5422	2587
10	15026068	16551767	6575	4470	1853
10	37790029	42372579	7896	2923	959
10	42372579	43894771	7841	3938	1526
10	29323236	29783692	2478	1502	739
10	102949239	104380410	3573	2067	886
10	104380410	106695048	7419	4353	1805
10	106695048	108726686	7975	4236	1737
10	53616629	55103572	6792	3911	1685
10	10249396	12586797	10702	7131	3280
10	57031140	57662146	2331	1105	475
10	13321600	15026068	8397	5965	2672
10	69900148	70195991	1424	692	313
10	50840915	53616629	8492	5017	2344
10	35109355	36572508	5227	2833	1301
10	31907519	33707968	7841	3782	1516
10	26888684	29323236	12208	6089	2631
10	91013381	92006581	4587	2405	1007
10	73508512	75422550	5788	2723	1230
10	80876749	82414679	8252	4352	1861
10	65794114	67549615	7089	3350	1415
10	63341695	65794114	9659	4825	2187
10	89127064	91013381	6754	3898	1870
10	70195991	72220850	9292	5558	2660
10	16551767	18537267	8601	5678	2477
10	12586797	13321600	3962	2900	1403
10	82414679	84383745	8327	4258	1944
10	48760450	50840915	6288	3653	1672
10	84383745	85458703	5118	2223	896
10	92006581	93335047	5016	2642	1195
10	61891409	62659679	3350	1736	713
10	75422550	78706814	9346	5326	2329
10	25578596	26888684	7136	3321	1382
10	87937577	89127064	4603	2564	1126
10	122407323	123231465	3751	2258	1043
10	96221243	97822357	6398	2970	1221
10	128001098	129154362	4238	2879	1417
10	43894771	44730075	4616	1961	867
10	57662146	58959528	6264	2241	804
10	134336329	134494673	637	329	166
10	129154362	130844284	9140	5816	2946
10	132580245	134336329	10287	6728	3207
10	72220850	73508512	6285	4240	2055
10	78706814	80876749	7982	5235	2478
10	85458703	87937577	10795	5129	2231
10	22772283	23175132	1520	1008	391
10	62659679	63341695	2131	1025	505
10	36572508	37790029	4665	2322	1037
10	44730075	48760450	10324	6169	3013
10	19716878	22772283	11730	7241	2806
11	120766806	121175943	1544	918	422
11	24088517	26045753	11837	5624	2228
11	101331121	103959636	12024	6309	2630
11	122591910	123500117	4203	2770	1428
11	121175943	122591910	4819	3167	1576
11	32276901	33958739	6578	3458	1570
11	44693799	47006137	6994	4239	1981
11	39382003	42310003	11671	6071	2565
11	68005825	69516130	5436	3257	1505
11	111114397	112459488	4247	2148	1018
11	114830666	116383348	5664	3902	1826
11	112459488	114257728	6880	4106	1959
11	37116815	39382003	9193	3777	1586
11	42310003	44693799	10811	5667	2525
11	109866116	111114397	4596	2649	1149
11	33958739	35502605	6758	3628	1740
11	58457495	58780549	1476	498	230
11	93276157	94242260	3861	1885	776
11	95726041	97057058	4934	2970	1337
11	94242260	95726041	5658	3204	1566
11	58780549	62223771	11975	6545	3012
11	35502605	37116815	6397	3851	1800
11	65898631	68005825	6340	3764	1658
11	131074612	133000046	8181	5831	2834
11	119215476	120766806	5695	3889	1864
11	130342575	131074612	3428	2205	1045
11	134205993	134946452	4682	2975	1398
11	28481593	30141357	5466	2962	1254
11	92077144	93276157	4135	2248	984
11	62223771	63804569	4745	2785	1343
11	128188537	130342575	8040	5389	2658
11	76797209	78355058	5093	2925	1187
11	116383348	117747110	6125	3891	1713
11	74412351	76797209	7941	4682	2205
11	69516130	70926292	5782	3790	1821
11	63804569	65898631	5613	3601	1669
11	30141357	32276901	5725	3271	1466
11	100417169	101331121	4393	2286	982
11	123500117	124495528	4912	2242	940
11	117747110	119215476	5031	3109	1399
11	78355058	80722373	9762	6719	2949
11	70926292	72286017	6250	2942	1294
11	133000046	134205993	4767	3281	1660
11	114257728	114830666	2157	1232	546
11	80722373	81266712	2725	1683	738
11	27020461	28481593	4125	2112	957
11	90966490	92077144	4899	2271	939
11	127316679	128188537	3782	1971	932
11	126311320	127316679	4224	2556	1319
11	89208936	90966490	6335	3195	1168
11	54695473	55082657	2093	862	314
11	55082657	58457495	15599	5741	1910
11	49866050	54695473	9194	3116	900
11	124495528	126311320	7158	4465	2113
11	47006137	49866050	10947	4569	1443
11	72286017	74412351	7036	3674	1609
11	104873284	106520894	5568	2638	1106
11	12564229	13373124	3343	2013	951
11	13373124	15742552	7754	3971	1815
11	8333274	9087317	2980	1834	695
11	19569535	21017138	6422	4443	2099
11	17578402	19569535	7997	4740	2229
11	26045753	27020461	5522	2280	1040
11	4746709	6322869	9918	5400	2232
11	3665481	4746709	5928	3681	1462
11	7436701	8333274	5304	3239	1478
11	10952027	12564229	7992	5722	2693
11	21017138	22374142	5934	3464	1550
11	87430235	89208936	7613	4037	1532
11	106520894	107844200	6002	3314	1314
11	81266712	84381272	13008	7460	2862
11	98705065	100417169	8872	5633	2177
11	6322869	7436701	4721	2902	1345
11	84381272	86619301	8800	4854	1835
11	15742552	17578402	5896	3114	1426
11	86619301	87430235	4484	2114	865
11	9087317	10952027	7643	4685	1882
11	103959636	104873284	3109	1438	592
11	107844200	108437037	1655	900	378
11	22374142	24088517	8210	4122	1691
11	70855	1213590	5231	3640	1753
11	1213590	3665481	12984	8884	4226
11	97057058	98705065	8138	4366	1687
11	108437037	109866116	4358	2788	1176
12	30512406	32165592	8538	4621	2015
12	29651255	30512406	4967	2582	1134
12	40816185	41658586	4190	1836	739
12	101447641	101862690	1674	964	459
12	101862690	102964986	4300	2237	1023
12	102964986	104848696	8006	4465	2067
12	41658586	43984474	9912	5029	2072
12	9031395	10481534	6309	3717	1656
12	96020785	97108839	5014	2891	1336
12	8377536	9031395	3057	1936	898
12	94514567	96020785	7315	4380	2019
12	89682122	92066155	7760	3878	1730
12	92066155	94514567	9614	5496	2655
12	39227169	40816185	5928	2877	1127
12	12733528	15241484	10240	6506	2984
12	61107	1080331	4397	3093	1614
12	3677037	4417679	3158	2173	1196
12	67181144	67909729	2965	1461	709
12	15241484	16310460	2858	1740	923
12	64032461	65559695	4915	2874	1382
12	109025901	110336719	5074	2951	1353
12	65559695	67181144	5165	3105	1523
12	106958748	109025901	7744	4282	1935
12	59308666	61123729	6346	2881	1177
12	61123729	64032461	12229	6162	2607
12	57548860	59308666	5675	2893	1331
12	67909729	69826542	7689	4769	2237
12	1080331	2544786	6600	4021	2044
12	80448150	81467767	3769	1900	878
12	110336719	113263518	6778	3400	1473
12	32165592	33076989	4924	2660	1133
12	33076989	37856717	9114	3158	981
12	99305987	101447641	7164	4038	1817
12	25371083	27799773	10698	5851	2629
12	55665837	57548860	5286	3078	1553
12	97108839	99305987	8547	5201	2331
12	4417679	5321472	3559	2425	1192
12	2544786	3677037	4807	3319	1721
12	127875098	129237297	6764	4679	2420
12	129237297	130377921	6005	4439	2163
12	113986709	115036602	5181	3168	1462
12	126445505	127875098	6905	3842	1865
12	124977980	126445505	6822	4450	2205
12	118135375	119754110	6887	4222	2055
12	115503216	117087471	6636	4468	2116
12	132807034	133841511	4846	3137	1408
12	119754110	122007651	8543	4962	2187
12	117087471	118135375	4207	2613	1232
12	131786751	132807034	4587	2964	1389
12	122007651	124977980	10765	6200	2737
12	5321472	6419753	4668	2974	1485
12	53039004	54778823	5850	3517	1684
12	37856717	39227169	7267	2639	819
12	54778823	55665837	3785	1740	855
12	49001866	51776494	8428	4500	2059
12	106436213	106958748	1967	1203	600
12	115036602	115503216	2223	1453	766
12	51776494	53039004	5046	3052	1421
12	11754846	12733528	4288	3026	1464
12	113263518	113986709	2600	1570	760
12	47714793	49001866	5853	2980	1269
12	83502666	84303844	4028	1531	660
12	84303844	85990426	5585	2524	1043
12	6419753	8377536	7923	5139	2535
12	72645075	73818454	4429	2183	879
12	76511314	78570570	8567	4600	2039
12	78570570	80448150	5484	3054	1545
12	104848696	106436213	6632	3908	1756
12	16310460	18087873	6619	3885	1666
12	18087873	20863943	13078	7520	3130
12	70957987	72645075	6424	3362	1562
12	23820634	25371083	6782	4436	2038
12	10481534	11754846	6449	3032	1245
12	130377921	131786751	8109	5628	2699
12	43984474	46024229	7251	3136	1418
12	81467767	83502666	7681	3694	1622
12	46024229	47714793	5505	3077	1343
12	69826542	70957987	5029	2536	1030
12	73818454	76511314	9812	5068	2101
12	20863943	23820634	11698	6517	2805
12	27799773	29651255	7753	3864	1622
12	85990426	89682122	12850	5250	2152
13	35026464	36046367	3247	1690	773
13	113572488	115109853	6313	4214	1965
13	36046367	37498185	5910	3410	1608
13	46495214	47431079	3475	2003	950
13	32301815	33776903	5360	2857	1388
13	44901409	46495214	5306	3195	1563
13	30483267	32301815	7765	4623	2349
13	82581814	84133144	5896	2557	1027
13	80585676	82581814	8188	4183	1788
13	33776903	35026464	4712	2488	1211
13	43101027	44901409	6728	3861	1851
13	60854778	61591949	3418	1751	740
13	63971559	65200602	6082	2263	921
13	59302271	60854778	6220	3146	1317
13	73934089	75670143	7280	4246	1988
13	61591949	63971559	10907	4814	1889
13	27284362	29257551	8939	5398	2593
13	77410555	78808813	5393	2515	1062
13	58410626	59302271	3183	1384	552
13	88559882	90521311	8214	3387	1415
13	71526791	73934089	10215	5972	2648
13	84133144	85610916	6220	2854	1165
13	67844453	70724516	13067	5912	2341
13	38878163	41069263	8799	4919	2345
13	70724516	71526791	3842	2183	1016
13	41069263	43101027	7598	3834	1724
13	37498185	38878163	6252	2961	1265
13	23594702	24531937	5235	3130	1418
13	22242174	23594702	7027	4567	2302
13	25784362	27284362	6570	3632	1712
13	90521311	93129691	10755	5520	2512
13	78808813	80585676	6029	3420	1478
13	75670143	77410555	7292	4172	1744
13	19020013	20686720	9370	4915	1994
13	53339622	54682864	4766	2669	1131
13	24531937	25784362	6956	4184	1893
13	85610916	88559882	12160	5436	2095
13	51591091	53339622	5661	2895	1321
13	49383962	51591091	7846	4377	1955
13	65200602	67844453	8760	4564	2042
13	20686720	22242174	7253	4544	2094
13	47431079	49383962	8427	4149	1757
13	108189877	109121210	4636	2634	1347
13	106750000	108189877	5665	3705	1883
13	57554217	58410626	2730	1271	529
13	104844114	106247554	6553	3798	1874
13	97519210	98938919	5124	3165	1512
13	96087558	97519210	4369	2326	896
13	98938919	100574095	7485	4584	2019
13	100574095	102300523	6972	4228	1900
13	102300523	104066710	7388	4405	1998
13	109121210	109815112	3435	1956	981
13	111232073	112247592	4917	3082	1466
13	109815112	111232073	7404	4861	2375
13	93586455	96087558	11004	6648	3094
13	55817131	57554217	5213	2212	882
13	104066710	104844114	3611	1997	914
13	54682864	55817131	4448	2020	897
13	112247592	113572488	5821	3950	1977
13	29257551	30483267	5190	2732	1329
13	106247554	106750000	2579	1532	772
13	93129691	93586455	1688	1029	471
14	87635341	89497643	7532	3572	1537
14	91296860	93132299	7808	4535	2186
14	89497643	91296860	7168	4537	2271
14	93132299	94325285	4538	2581	1204
14	24905123	26135686	5577	2826	1210
14	53474383	53997831	2116	1068	447
14	83138097	84241633	4376	2286	1059
14	56216880	57481262	5561	3491	1553
14	55233681	56216880	4092	1957	781
14	85746319	86647002	3786	2246	931
14	65220298	66399555	4735	2689	1147
14	67992317	71131957	11895	6620	2979
14	57481262	59448336	7375	4353	1908
14	59448336	61680424	7404	3735	1442
14	53997831	55233681	4088	2608	1294
14	61680424	63790015	9051	5426	2296
14	81579714	83138097	5997	3055	1493
14	66399555	67992317	6757	2311	927
14	84241633	85746319	6277	3399	1409
14	72889615	76444767	12928	7589	3376
14	80186579	81579714	5518	3041	1241
14	94325285	95750867	7079	4413	2238
14	95750867	96262415	2930	1839	937
14	103012102	105001723	8508	4983	2254
14	96262415	98341162	8631	5105	2613
14	99138532	101534307	9485	6169	3103
14	86647002	87635341	4156	2263	1006
14	77229472	78561945	6182	3612	1647
14	105001723	106340358	5437	3884	1834
14	98341162	99138532	4222	2091	969
14	101534307	103012102	5977	3686	1827
14	106340358	107289454	6081	4646	1479
14	71131957	72889615	7098	3819	1622
14	32383265	34846251	10389	7566	3740
14	40341990	41615502	6865	2527	895
14	76444767	77229472	3512	2162	1091
14	46081896	46749130	2651	1246	444
14	29972145	32383265	8326	4720	2167
14	26135686	28466533	8934	4926	2230
14	35859593	38667725	9309	5145	2309
14	38667725	40341990	6265	3417	1297
14	44543227	46081896	5059	2674	1163
14	43137389	44543227	6639	3337	1202
14	48573586	49005471	2025	829	332
14	19002084	21589402	9332	6821	3572
14	34846251	35859593	4895	2504	1003
14	49005471	50507760	5796	3428	1480
14	50507760	51493572	3646	2320	1039
14	46749130	48573586	7625	4021	1495
14	23018665	24905123	7445	4849	2585
14	28466533	29972145	5036	2749	1240
14	63790015	65220298	5082	2762	1177
14	78561945	80186579	5668	3390	1578
14	51493572	53474383	8803	5096	2238
14	41615502	43137389	6724	3091	1088
14	21589402	23018665	7256	4151	1959
15	29338502	30165568	3198	1943	980
15	38530777	40384132	7577	4520	2031
15	50008043	51677560	6444	3360	1349
15	31591821	32441811	3137	1961	922
15	48136048	50008043	5399	2489	1098
15	46618787	48136048	6272	2938	1226
15	27298112	29338502	6528	4061	2073
15	40384132	41177514	2416	1527	696
15	88369943	90475551	8005	5686	2637
15	84260468	86652905	9592	6050	2254
15	90475551	92164392	7339	5093	2183
15	42776399	44198049	2793	1667	694
15	41177514	42776399	5473	3027	1299
15	44198049	46618787	7143	3966	1809
15	30165568	31591821	3990	2715	1368
15	80860978	84260468	9481	6277	2811
15	92164392	93780902	7746	5635	2612
15	73628714	76398624	7937	4795	2212
15	20001200	21131604	2224	1859	1233
15	54508528	55136269	3319	1843	678
15	55136269	56901773	8036	4427	1718
15	25108590	27298112	10063	6468	3230
15	86652905	88369943	8268	5390	2148
15	51677560	53069096	4564	2650	1108
15	69017999	70133341	3506	2210	1099
15	67094767	69017999	6774	4112	1858
15	53069096	54508528	6869	3693	1571
15	65104668	67094767	7392	4504	2008
15	37456502	38530777	4149	2600	1112
15	35083251	37456502	8684	5324	2678
15	21131604	24195127	7347	5702	3318
15	59694116	61265836	6052	4251	1951
15	93780902	94924330	6181	4175	2112
15	71922649	73628714	4733	2620	1118
15	24195127	25108590	7632	3457	1102
15	61265836	63215222	7946	5745	2570
15	58441366	59694116	5255	3706	1576
15	56901773	58441366	6146	4064	1640
15	94924330	96141596	4967	3487	1745
15	101552694	102520966	4412	3246	1640
15	34015425	35083251	5443	3052	1382
15	63215222	65104668	6637	3754	1570
15	99244059	100636847	6678	4334	1939
15	100636847	101552694	4939	3212	1518
15	70133341	71922649	6529	4400	2136
15	98030910	99244059	6465	4347	2045
15	32441811	34015425	6522	4388	2166
15	96141596	98030910	7564	5071	2563
15	76398624	78516053	7260	4003	1606
15	78516053	80860978	10309	6446	2867
16	24136875	25986862	8137	5027	2484
16	10426032	11520161	5726	4151	1812
16	46399473	49007926	5786	3231	1579
16	17644749	18643607	3151	2127	1029
16	59045405	60745694	6824	3950	1684
16	74971503	75977954	4466	2671	1066
16	75977954	77523678	8116	5106	1879
16	77523678	78456292	6832	4418	1848
16	29036613	31382943	5074	3554	1614
16	22448904	24136875	6252	3739	1944
16	27445755	29036613	3890	2645	1340
16	9799419	10426032	3323	2130	867
16	49007926	52035823	10541	6739	3407
16	18643607	20150571	5859	3571	1668
16	78456292	79134815	5721	4232	1895
16	68841363	71054028	6481	4248	1758
16	72935150	74971503	8736	6439	2952
16	71054028	72935150	5822	3702	1346
16	65938566	68841363	8356	4864	2021
16	13154437	14464002	6031	3726	1645
16	12613098	13154437	4231	2494	1068
16	86156599	86815411	4556	3573	1704
16	20150571	22448904	6711	3953	1968
16	89041165	90292812	6403	4286	1737
16	79134815	80297374	6919	5016	2104
16	55903774	57664330	7433	4516	2138
16	87647349	89041165	8740	6428	2880
16	80297374	81772536	8935	6190	2680
16	53382572	55903774	11104	6938	3347
16	60745694	62229849	4815	2559	1171
16	83477208	84445883	6774	5246	2387
16	84445883	85148685	4984	3792	1727
16	82747728	83477208	5253	3913	1625
16	85148685	86156599	5417	4482	2314
16	6893551	7529121	5549	3677	1390
16	2764829	4001196	4698	3423	1608
16	5118345	5891580	5161	3836	1598
16	60054	1207206	6183	4606	2241
16	1207206	2764829	6900	4887	2247
16	5891580	6893551	7052	5415	2433
16	57664330	59045405	7022	4018	1866
16	8338519	9799419	9210	6319	2705
16	4001196	5118345	5073	3690	1663
16	7529121	8338519	6220	4025	1793
16	52035823	53382572	4935	2733	1339
16	86815411	87647349	4574	3390	1538
16	31382943	46399473	9083	5154	2338
16	62229849	63691589	5234	3166	1462
16	63691589	65938566	8894	5092	2184
16	81772536	82747728	6408	4480	2001
16	11520161	12613098	5524	3770	1603
16	16154060	17644749	5187	3623	1827
16	25986862	27445755	6767	4493	2251
16	14464002	16154060	4734	3334	1556
17	61545589	63148128	4136	2679	1328
17	55357541	57487512	6570	4230	2052
17	78837588	80034408	5992	4062	1942
17	80034408	81194908	5713	3626	1602
17	67858770	69387817	6227	3670	1638
17	49898957	50719055	2872	1458	609
17	50719055	51826118	4442	2098	868
17	59312755	61545589	6268	4175	1957
17	64800430	67858770	10970	7163	3399
17	74375560	76263413	9422	6306	3170
17	47517400	49898957	8366	5829	2888
17	53599432	55357541	6411	3689	1906
17	63148128	64800430	7714	4174	1828
17	9965921	11102815	4680	3016	1602
17	39899810	41772087	5079	3121	1456
17	15019097	16412342	4983	3058	1369
17	11102815	12534769	5629	3780	1829
17	38877404	39899810	4862	2289	1013
17	32912798	34469036	5863	3354	1655
17	43056905	45876022	10714	5226	2034
17	21290357	27334244	9356	5644	2608
17	27334244	29786491	6653	3526	1483
17	13180372	13894637	3960	2446	1282
17	12534769	13180372	3284	2060	1013
17	57487512	59312755	3746	2268	1087
17	41772087	43056905	3973	2430	1074
17	34469036	36809344	6648	4737	2418
17	18856320	21290357	6754	4148	1955
17	31538425	32912798	6080	3774	1858
17	16412342	18856320	8092	4989	2156
17	29786491	31538425	6161	3974	1892
17	51826118	53599432	6492	3686	1695
17	36809344	38877404	6481	3784	1800
17	4696261	5741334	4897	2987	1243
17	1928731	3702312	8112	5508	2615
17	1172399	1928731	4046	2899	1446
17	69387817	72672203	14660	10450	5229
17	8306425	9965921	6878	4882	2491
17	56	1172399	6724	4995	2620
17	76263413	77298636	5489	4168	2089
17	3702312	4696261	4533	3181	1588
17	7317398	8306425	3996	2657	1247
17	72672203	74375560	6366	4034	1922
17	13894637	15019097	6035	3686	1795
17	77298636	78837588	7162	4967	2410
17	45876022	47517400	5927	3348	1490
17	5741334	7317398	7372	5312	2641
18	25927682	26875587	3211	1454	622
18	73526987	74813815	6730	4315	2141
18	75976317	77149991	6233	3633	1722
18	71038474	71971462	4511	2945	1419
18	71971462	73526987	6366	3862	1921
18	30264066	31780067	4713	2187	1027
18	77149991	78017158	4367	2880	1319
18	74813815	75976317	6821	4238	2037
18	42922106	44299246	5314	3456	1589
18	44299246	45939732	6630	3943	1775
18	36365490	37684367	4082	2125	896
18	39892648	42922106	10699	5714	2515
18	37684367	39892648	8247	4005	1829
18	27866478	30264066	9068	4990	2289
18	7090485	8498931	6120	3695	1869
18	19485844	20649472	3879	2205	1022
18	11075913	11905440	3890	2414	1224
18	5834180	7090485	5144	3422	1839
18	20649472	22996651	7974	5241	2401
18	10644	912486	4766	3235	1627
18	912486	1942911	4228	2393	1152
18	24026191	25927682	6752	4163	2031
18	11905440	14440799	11491	6804	2999
18	14440799	19485844	5316	3136	1272
18	22996651	24026191	3850	2103	909
18	3891658	5834180	9034	5804	2882
18	68621179	69621618	5068	2770	1208
18	57630483	59020751	5702	2843	1207
18	69621618	71038474	7275	3977	1888
18	8498931	11075913	12755	8103	3999
18	45939732	47730584	7449	4675	2057
18	63463402	64252801	3368	1542	641
18	59020751	60277715	5632	3187	1466
18	66125817	67175820	4604	2427	1191
18	51554175	55213838	11955	6489	2884
18	67175820	68621179	6253	3576	1724
18	47730584	51062185	14098	7790	3261
18	55213838	56530220	5863	3702	1736
18	61820252	63463402	6949	3526	1528
18	64252801	66125817	8850	4634	1995
18	60277715	61820252	5608	3055	1475
18	26875587	27866478	4021	1882	818
18	35075250	36365490	4382	2394	1116
18	33861964	35075250	3632	2296	1068
18	1942911	3891658	9567	6468	3247
18	31780067	33861964	6684	3656	1666
18	51062185	51554175	2837	1193	447
18	56530220	57630483	5557	3624	1713
19	5811852	6684885	4451	2815	1426
19	8347513	9238393	3989	2513	1292
19	11284028	13471127	8139	4650	2240
19	28557893	29790947	6216	3158	1274
19	15648610	16374416	4589	2360	1007
19	6684885	8347513	8812	6132	3061
19	14486347	15648610	5421	3496	1716
19	80840	610729	2814	2208	1202
19	13471127	14486347	3841	2815	1472
19	36469295	37527033	3834	1887	790
19	34262952	36469295	9011	5602	2791
19	19877471	20905757	5323	2512	1006
19	37527033	40170619	9664	5671	2408
19	3019660	4348967	6711	5067	2649
19	40170619	40984601	3426	1884	916
19	9238393	11284028	8376	4894	2274
19	2098396	3019660	5277	3799	1842
19	29790947	30727954	4399	2599	1272
19	30727954	32746520	6671	4054	2124
19	610729	2098396	7819	6247	3324
19	32746520	34262952	7026	4045	1840
19	18409862	19877471	4888	3120	1449
19	46102697	47150082	4883	2966	1471
19	55728080	57521335	9154	6479	3384
19	42131573	43862455	6470	3498	1504
19	57521335	59118839	6571	4310	1908
19	51532567	52985290	7274	4398	2169
19	54602362	55728080	7809	5334	2633
19	16374416	18409862	9211	6091	3010
19	47150082	49282227	9080	5683	2787
19	49282227	51532567	9987	6893	3507
19	20905757	22732896	9635	4012	1559
19	44744108	46102697	5969	3848	1907
19	52985290	54602362	10839	7748	3856
19	4348967	5811852	7215	5286	2616
19	43862455	44744108	3591	2052	1004
19	40984601	42131573	4843	3039	1471
19	23467746	28557893	10246	4216	1595
19	22732896	23467746	3776	1740	652
20	58406572	59561724	4911	2830	1418
20	52472549	54055266	7065	4158	1936
20	56447959	58406572	7885	5407	2817
20	54055266	56447959	11425	7366	3593
20	61301855	62190180	5006	3477	1705
20	49239658	52472549	13379	8728	4138
20	47199980	49239658	8033	4636	2060
20	59561724	61301855	8927	6006	2910
20	38436761	39610856	4163	2666	1214
20	11249536	12447499	4984	2626	1181
20	20959710	22491456	4419	2332	1069
20	12447499	13689864	5864	3083	1456
20	24717724	25344231	2856	1279	504
20	40585689	41615460	4220	2763	1283
20	9730921	11249536	6337	3805	1985
20	44839056	47199980	9154	6245	2975
20	31614823	32813441	3061	1933	898
20	41615460	42680176	4171	2692	1326
20	7084073	8117011	4241	2245	1046
20	32813441	34960446	5570	2801	1157
20	13689864	15958359	9006	5406	2388
20	39610856	40585689	3234	1794	742
20	36909530	38436761	5215	3111	1348
20	34960446	36909530	5292	3286	1597
20	18972203	20959710	7284	4280	2063
20	17487232	18972203	6921	3724	1721
20	25344231	31614823	10078	5296	2140
20	15958359	17487232	7318	4226	1931
20	3828413	5477850	8135	5324	2555
20	2469501	3828413	5590	3515	1716
20	5477850	7084073	7117	4466	2215
20	8117011	9730921	6011	3545	1739
20	23293790	24717724	6747	3183	1449
20	22491456	23293790	2810	1751	834
20	62190180	62965163	3318	2274	1088
20	697600	2469501	7989	5336	2754
20	60479	697600	2982	2205	1219
20	42680176	44839056	8118	4640	2160
21	22072764	23362875	6043	3479	1580
21	23362875	24696231	5385	2897	1302
21	24696231	26469122	8808	4740	2063
21	46177105	47492226	6459	4418	1908
21	26469122	27271019	2940	1696	678
21	29125226	31197025	8107	4416	1691
21	44506268	46177105	7002	4907	2288
21	27271019	29125226	8546	5410	2390
21	31197025	32668642	5746	2777	1348
21	47492226	48119752	3403	1981	776
21	40482902	41389527	4413	2604	1152
21	20962339	22072764	5616	3086	1402
21	41389527	43321528	9610	6666	3158
21	36524373	37870779	6180	3590	1521
21	37870779	38711704	3612	2080	1003
21	18053165	19480375	6443	3923	1802
21	19480375	20962339	7503	4236	1866
21	38711704	40482902	7280	4588	2168
21	43321528	44506268	6989	4428	2091
21	15950982	18053165	7329	4881	2466
21	35225465	36524373	4833	3280	1616
21	34376999	35225465	2842	1890	916
21	9411243	15950982	10833	7418	4467
21	32668642	34376999	6694	4193	1936
22	26791628	27834752	5376	3663	1952
22	19912358	22357325	7854	5169	2717
22	18296088	19912358	7333	4533	2322
22	22357325	23712647	7772	5131	2171
22	16050408	17674295	5109	3531	1796
22	24984204	26791628	8703	5663	2785
22	17674295	18296088	3393	2268	1231
22	23712647	24984204	5892	3351	1612
22	27834752	29651799	6240	3829	1720
22	31439918	32664986	4818	2475	992
22	42690818	43714200	5041	3434	1474
22	44995308	46470495	7762	5502	2616
22	40545797	42690818	6225	3589	1304
22	29651799	31439918	6422	3599	1521
22	37570269	39307894	6146	4127	1891
22	34494914	35530985	5450	2788	1136
22	39307894	40545797	4142	2766	1349
22	32664986	34494914	8849	5525	2614
22	43714200	44995308	6295	4395	2089
22	47596318	48903703	6752	4733	2301
22	49824534	51243298	7101	4770	2160
22	48903703	49824534	7334	5093	2389
22	46470495	47596318	5578	3698	1745
22	35530985	37570269	9090	5720	2780

## Sheet: ST3e
Supplementary Table 3e: Effective number of variants within LD Blocks in EUR population with MAF greater than or equal to 0.001.
CHR	Start Position	End Position	Number of Raw Variants	Unique Variants	Effective Number of Tests
1	99800604	100826405	5234	2543	1410
1	247344518	249239466	11523	6520	3329
1	63455089	65041704	8416	4786	2647
1	61922365	63455089	7854	4771	2577
1	230685255	232090252	7798	4638	2504
1	237555628	238567807	6831	3724	1923
1	238567807	239925314	8513	4637	2503
1	244109499	245506746	8167	5629	3221
1	83991748	84844495	4178	2132	1159
1	81354191	83991748	14809	8301	4170
1	239925314	240564091	4074	2619	1439
1	240564091	241582220	6047	4168	2464
1	212842330	214578266	8947	5263	2831
1	178954470	181144121	12169	5960	2949
1	173097907	175089768	8953	3595	1751
1	245506746	247344518	13290	8041	4045
1	178944309	178954470	53	40	27
1	65041704	66939404	9078	4970	2683
1	233429284	234599434	7561	4491	2441
1	170557776	173097907	12532	6750	3435
1	162346721	165191702	15661	8717	4649
1	169086324	170557776	8518	3799	1859
1	49894177	51713726	6000	2865	1571
1	12779466	14891511	10235	6686	3676
1	48978188	49894177	3362	1876	1049
1	181144121	182755356	8384	4711	2537
1	189904130	191868930	9808	4612	2161
1	182755356	184595513	9678	4845	2593
1	166460517	169086324	15095	8604	4559
1	229156248	230685255	8397	5108	2854
1	191868930	194107442	11523	5599	2899
1	51713726	54226262	11879	5859	3177
1	188759945	189904130	6651	2696	1393
1	197311514	199239884	8345	4616	2319
1	221858231	222230220	1821	1170	661
1	226810860	229156248	12099	6315	3027
1	186810023	188759945	11527	5631	2785
1	219590571	221858231	12167	6061	3094
1	235819436	237555628	10558	6577	3489
1	222230220	224938520	13025	7576	3766
1	216243634	218705513	13706	7691	3971
1	224938520	226810860	9508	5073	2614
1	234599434	235819436	6513	4106	2329
1	14891511	16897730	12167	7473	3998
1	165191702	166460517	7064	4038	2223
1	196176201	197311514	5014	2389	1205
1	86454751	88128631	9125	4580	2452
1	84844495	86454751	8462	4929	2618
1	93536459	94506191	4735	2219	1252
1	91886317	93536459	8056	4236	2124
1	46899501	48002576	5928	3093	1618
1	184595513	186810023	11503	5221	2684
1	199239884	200137649	5166	2651	1381
1	48002576	48978188	4802	2626	1462
1	16897730	18662899	10400	7067	4068
1	94506191	96150893	8114	4791	2513
1	242071602	244109499	10683	6644	3337
1	9365199	10806984	7419	4363	2467
1	88128631	90066303	9288	4919	2654
1	20469149	21736588	6444	3770	1993
1	203334734	204681068	7528	4702	2629
1	23920590	25516845	8001	5133	2824
1	21736588	23086883	8450	5312	2835
1	156336133	158027412	8874	5049	2842
1	241582220	242071602	2908	1878	1143
1	57021728	58865399	10082	5901	3147
1	30161881	32438685	13023	7465	3991
1	25516845	27401867	7941	4627	2516
1	7247335	9365199	10788	7197	3772
1	23086883	23920590	3583	2251	1290
1	54226262	56413117	12754	7546	3997
1	27401867	30161881	11854	6690	3561
1	3582736	4380811	4947	3172	1838
1	110303931	111741737	7390	4595	2512
1	38731847	40200567	7455	4446	2443
1	177433381	178944309	6896	3884	1998
1	56413117	57021728	3505	1906	1019
1	1892607	3582736	11385	7747	4297
1	204681068	206073265	6859	4074	2234
1	4380811	5913893	10517	6778	3659
1	111741737	113273306	8171	4968	2723
1	5913893	7247335	7455	4618	2418
1	18662899	20469149	10655	6436	3548
1	34799758	37549183	12170	7119	3909
1	118839067	144977494	16291	10683	6185
1	151538881	153180829	7982	3955	2063
1	159913048	162346721	13157	7867	4169
1	153180829	154770403	6719	4235	2366
1	58865399	59890409	5490	3034	1709
1	102041016	102898745	5513	2510	1447
1	106087842	108409665	11706	6369	3366
1	68477895	69687616	5943	3243	1769
1	40200567	41975327	9191	5266	2869
1	10583	1892607	8592	5733	3222
1	232090252	233429284	8155	4835	2681
1	11777841	12779466	5526	3451	1954
1	114873845	115880593	4873	2465	1321
1	102898745	103914211	5490	2220	1140
1	79661198	81354191	10199	4898	2334
1	154770403	156336133	5513	3352	1876
1	218705513	219590571	4894	2458	1310
1	148361253	151538881	10506	6092	3439
1	37549183	38731847	6149	3658	2051
1	71372470	71684405	1402	702	394
1	158027412	159913048	11188	5761	3072
1	76728135	79661198	14946	7722	3940
1	71684405	74326907	11788	5255	2649
1	144977494	148361253	8154	4805	2685
1	108409665	110303931	9039	4997	2748
1	43758457	44969183	5277	2941	1571
1	208410364	210787750	12916	7592	3953
1	206073265	208410364	10238	5875	3224
1	74326907	76728135	11536	5651	2867
1	66939404	68477895	7827	4504	2388
1	200137649	201589975	8157	5050	2716
1	201589975	203334734	8307	5400	3047
1	41975327	43758457	8511	4462	2330
1	44969183	46899501	8454	4089	2120
1	69687616	71372470	7902	4328	2257
1	90066303	91886317	8527	5028	2725
1	10806984	11777841	5195	3342	1909
1	100826405	102041016	6503	3386	1842
1	175089768	177433381	11140	6078	3215
1	194107442	196176201	11674	5340	2671
1	214578266	216243634	9196	4734	2447
1	96150893	97885249	8763	4324	2170
1	97885249	99800604	9769	4989	2643
1	210787750	212842330	11169	6000	3032
1	113273306	114873845	7346	4508	2469
1	32438685	34799758	10149	6253	3444
1	103914211	106087842	12654	5858	2840
1	59890409	61922365	9793	5454	3040
1	115880593	118839067	13984	7785	4190
2	129474441	130067170	3128	1647	953
2	137042794	138698117	9753	4744	2244
2	217715661	218395480	3829	2330	1254
2	6836254	8422147	8056	5102	2982
2	130067170	130658085	3131	1694	991
2	64625913	65933444	6789	4292	2391
2	225840004	228119842	11723	6072	3233
2	47318772	48213001	5368	3599	1924
2	28598777	29217559	3361	2069	1125
2	26894985	28598777	6839	3700	1798
2	140100271	141805351	10252	4948	2351
2	29217559	30463711	7012	4477	2286
2	19692404	21050490	7701	4806	2600
2	24686918	26894985	10221	5974	3015
2	14335308	16329735	11059	6321	3286
2	12419150	14335308	11201	5901	3076
2	138698117	140100271	6492	3248	1855
2	150210292	151731462	7254	3984	2165
2	18647423	19692404	5229	2996	1588
2	21050490	23341383	11235	6436	3319
2	16329735	18647423	12940	6841	3583
2	141805351	142518602	4891	2680	1219
2	146445570	147277162	3580	1895	1043
2	23341383	24686918	7045	3855	1982
2	147277162	150210292	11672	6065	3186
2	50022257	50818928	4556	2872	1238
2	133042784	135158578	11103	7029	3641
2	48213001	50022257	10480	6887	2978
2	224859419	225840004	5182	2733	1402
2	198078110	199311125	4619	2439	1299
2	53508452	54685226	7046	4166	1882
2	196447456	198078110	7684	3797	1925
2	199311125	201576284	8723	5056	2549
2	151731462	152486782	4080	2096	1081
2	46482634	47318772	5174	3592	1785
2	54685226	56203345	9262	5441	2298
2	135158578	137042794	7185	3413	1758
2	116772470	118367466	9236	4105	1935
2	218395480	220454551	9014	5274	2979
2	130658085	133042784	12214	7084	3643
2	75630086	76913661	7561	4362	2061
2	76913661	78079264	8136	4759	2277
2	220454551	222521176	11385	6891	3597
2	206735704	208645399	9586	5739	2957
2	67226166	68010176	4856	2959	1422
2	127373764	128034347	4122	2421	1383
2	202818637	205799241	12370	7318	3662
2	209941529	212379518	12210	6654	3114
2	212379518	214014282	9633	5746	2733
2	70755198	73174848	11942	7250	3648
2	121303783	123302906	10051	5644	3044
2	3973779	5708337	10221	6109	3343
2	68010176	69139564	6095	3513	1875
2	10133	1781022	12268	7399	3640
2	195861164	196447456	3657	1738	915
2	165178840	167160270	9022	5029	2537
2	44313803	46482634	12868	9101	4394
2	167355970	169968236	14205	7940	3891
2	163503551	164466638	4890	2336	1310
2	181312739	182266031	5207	2718	1369
2	118367466	121303783	14969	8182	4196
2	175588929	177363636	8495	4749	2458
2	10298469	12419150	13623	8805	4733
2	123302906	124732250	8656	3996	2030
2	169968236	171226245	7671	4246	2141
2	65933444	67226166	6865	4135	2215
2	191973357	195861164	16663	8782	4545
2	173138905	175588929	13132	7805	4135
2	208645399	209941529	6459	3707	1940
2	164466638	165178840	2883	1768	1011
2	201576284	202818637	5173	2930	1587
2	222521176	224859419	12234	6575	3607
2	142518602	144519484	9938	5306	2687
2	8422147	10298469	10244	6697	3607
2	177363636	178553183	6438	3324	1742
2	73174848	75630086	10975	6838	3401
2	171226245	173138905	10287	5931	2946
2	235150987	236043550	6362	4105	2369
2	228119842	229370787	8029	4294	2301
2	124732250	125840921	5501	3138	1684
2	69139564	70755198	7647	4123	2142
2	184357608	185280173	5435	2500	1183
2	231843389	233550003	9737	5681	2943
2	189882065	191973357	9217	4585	2366
2	237449032	238760981	9166	5199	2723
2	229370787	231843389	13523	7900	4202
2	236043550	237449032	8103	5046	2769
2	113921856	116772470	13395	7717	3739
2	144519484	146445570	7140	4213	2320
2	39031337	40281483	6119	3653	1756
2	238760981	239952643	7493	4623	2453
2	233550003	235150987	9357	5686	3016
2	167160270	167355970	975	607	354
2	205799241	206735704	4789	3377	1839
2	56203345	57429100	7860	4433	1895
2	185280173	189882065	21109	9555	4176
2	214014282	215573795	8296	4273	1996
2	31550450	33363777	9703	5417	2330
2	101822329	102688765	4275	2433	1329
2	88038507	89154526	4656	2588	1514
2	85140680	88038507	12448	7439	3807
2	152486782	154005056	7507	4143	2019
2	107408267	108429177	5368	2635	1436
2	155391135	157560635	10205	5243	2534
2	239952643	241560084	11324	7226	3960
2	242149921	243188920	6383	3688	1857
2	102688765	103588215	4492	2284	1231
2	33363777	35345028	14785	8691	3997
2	110572432	113921856	12067	7259	3848
2	80050403	81620841	7689	4870	2442
2	161769733	163503551	6688	3333	1844
2	98995201	101822329	13990	6910	3288
2	178553183	181312739	14827	8005	3812
2	30463711	31550450	6889	4310	2200
2	103588215	105125034	7130	3572	1969
2	182266031	184357608	11187	5846	2890
2	108429177	110572432	10504	5453	2812
2	154005056	155391135	7206	4336	2034
2	95326452	98995201	11997	6291	3030
2	40281483	43309590	18098	12099	5104
2	106210058	107408267	7628	4104	2173
2	38132712	39031337	5772	3618	1681
2	159577082	161769733	12036	6291	2971
2	128034347	129474441	7925	4288	2255
2	158533218	159577082	5819	3155	1632
2	36122006	38132712	13230	8383	3935
2	60292000	62429044	9463	6085	2846
2	52491133	53508452	6686	4085	1624
2	125840921	127373764	7975	3459	1725
2	43309590	44313803	5889	3861	1796
2	50818928	52491133	9333	5932	2519
2	241560084	242149921	3825	2425	1367
2	35345028	36122006	5518	3062	1273
2	57429100	58297315	4872	2834	1230
2	5708337	6836254	6799	4023	2219
2	58297315	60292000	9204	6283	2949
2	62429044	64625913	9677	5658	2540
2	1781022	3973779	14029	8812	4632
2	215573795	217715661	11260	7137	3738
2	105125034	106210058	6073	3526	1949
2	89154526	95326452	4370	3270	1691
2	157560635	158533218	3882	2267	1339
2	78079264	80050403	11657	6580	3133
2	81620841	85140680	17956	7096	3306
3	8648561	9543183	5450	3826	2160
3	14816900	16282442	7934	4360	2265
3	7083387	8648561	10487	6417	3098
3	11019665	13070799	11067	6823	3511
3	2992120	4431647	10798	6874	3430
3	6083183	7083387	6920	4464	2298
3	9543183	11019665	8164	5446	2942
3	21643707	22204244	4888	3129	1561
3	22204244	23804865	9662	5562	2480
3	49316972	51832015	8187	3702	1829
3	170964909	172295731	7148	4526	2527
3	19125144	20091348	4348	2416	1318
3	60272906	62355666	12690	8211	4136
3	23804865	25461558	10827	6692	3184
3	63669286	65273538	9426	6198	2990
3	54081390	55348860	7255	5021	2587
3	13070799	14816900	10086	6546	3480
3	16282442	17891118	8347	4331	2169
3	173477285	175116539	9726	5989	2867
3	20091348	21643707	10493	5907	2679
3	154714218	156008700	6430	3233	1705
3	46657500	47727212	3869	1945	1076
3	58157519	60272906	12045	7328	3633
3	26877769	27840910	5872	2905	1383
3	32351715	33255592	5517	3234	1748
3	25461558	26877769	7605	4134	2123
3	30717955	32351715	9125	5547	2892
3	175116539	176320287	6880	3670	1978
3	172295731	173477285	5631	3634	1989
3	70449028	72529329	9963	7184	3806
3	55348860	56433907	5725	3208	1618
3	27840910	29142260	6768	4011	2008
3	33255592	35283458	10311	5660	2622
3	157312028	159477890	10225	4838	2371
3	56433907	58157519	8498	4659	2249
3	47727212	49316972	4662	2469	1349
3	163253205	165055469	8908	3756	1782
3	153256571	154714218	7206	3374	1730
3	186890344	188856214	10671	6670	3778
3	35283458	36486842	6439	3535	1742
3	190226607	192343814	13899	7247	3716
3	179374586	181511166	9167	4982	2541
3	183769683	185068255	6893	4224	2385
3	197075987	197946622	5197	3132	1764
3	185068255	186890344	9298	6170	3475
3	156008700	157312028	6201	3044	1592
3	167117429	168580960	6129	3462	1915
3	168580960	170964909	12003	6604	3395
3	181511166	183769683	10425	6191	3376
3	159477890	161524504	9645	4403	2204
3	38356116	40221298	10304	5172	2674
3	29142260	30717955	10023	6012	3087
3	84367479	85582231	6680	2792	1318
3	60157	1441779	9503	6569	3273
3	75704949	77508835	9426	5573	2693
3	151348730	153256571	9716	5244	2656
3	85582231	87409732	10339	4346	2073
3	79024541	81427310	11178	4965	2323
3	51832015	54081390	9674	5371	2716
3	77508835	79024541	7343	3861	1981
3	178107165	179374586	6390	3619	1873
3	82643886	84367479	7992	3723	1690
3	150252004	151348730	5585	3436	1852
3	74321817	75704949	8172	4363	2011
3	116800153	118530251	9030	5272	2557
3	103084960	104581613	9350	4184	2066
3	118530251	120523055	10106	5095	2598
3	192343814	194059671	9750	5987	3267
3	106982811	109522395	12412	6513	3243
3	100592217	103084960	12693	5844	2843
3	194786674	195971408	8892	5917	3062
3	99373762	100592217	6118	2615	1299
3	120523055	121974097	7323	3124	1597
3	133252173	135456906	10899	6587	3426
3	36486842	38356116	8670	4807	2509
3	124936642	126214943	8586	4393	2081
3	110513770	112815699	12798	6014	3032
3	104581613	106982811	13743	6868	3488
3	137371083	139954597	11431	6357	3253
3	87409732	88298373	4697	2095	1067
3	81427310	82643886	5484	2729	1386
3	72529329	74321817	10098	6522	3351
3	109522395	110513770	5143	2400	1240
3	113947863	115447080	6711	3616	2030
3	141339097	143164628	9038	5181	2744
3	146726629	149043237	11805	6513	3495
3	131836516	133252173	7595	3761	1942
3	135456906	137371083	7835	4091	1908
3	195971408	197075987	6675	4183	2292
3	145664619	146726629	6017	2905	1476
3	144410816	145664619	7299	3451	1775
3	126214943	128194861	9744	5136	2643
3	65273538	66270447	5186	3665	1928
3	40221298	41064528	3929	1983	1144
3	121974097	123517768	7723	4246	2346
3	95311971	98215950	15066	6531	2969
3	1441779	2992120	12882	8846	4272
3	94255316	95311971	6211	2594	1225
3	188856214	190226607	9153	5291	2729
3	41064528	42540002	8700	4446	2197
3	68286914	69276762	5499	3339	1543
3	62355666	63669286	8111	4966	2614
3	69276762	70449028	6189	3728	1833
3	42540002	45165153	10872	5758	2948
3	17891118	19125144	5908	3179	1750
3	45165153	46657500	8716	4180	2047
3	161524504	163253205	11003	4266	1920
3	149043237	150252004	6312	3723	2060
3	165055469	167117429	11847	4762	2254
3	115447080	116800153	7033	4165	2077
3	112815699	113947863	5540	2944	1594
3	123517768	124936642	7665	4435	2263
3	4431647	6083183	11705	8308	4242
3	194059671	194786674	5835	3711	2050
3	66270447	68286914	11535	6946	3289
3	98215950	99373762	7378	3210	1581
3	139954597	141339097	6930	3973	2109
3	143164628	144410816	6630	3176	1726
3	128194861	130244735	11112	5603	2792
3	88298373	94255316	15681	6431	2832
3	176320287	178107165	9481	5538	2969
3	130244735	131836516	8353	4154	2013
4	79093979	80990297	9107	4453	2292
4	131283821	132954033	9401	4567	2144
4	72140558	74592390	11700	5381	2816
4	83372593	84799656	7743	4324	2358
4	136566407	138541971	10981	5646	2935
4	130591885	131283821	4382	2028	1088
4	139556511	141084631	7403	4630	2588
4	134628434	136566407	9901	4715	2291
4	74592390	77130707	12959	6492	3389
4	90231564	91560677	7259	3256	1733
4	68854765	71049152	14482	6370	2955
4	132954033	134628434	10127	4101	2064
4	68059497	68854765	4129	2083	1181
4	89238028	90231564	4908	2848	1585
4	128996665	130591885	8040	4309	2273
4	84799656	86930609	10231	4980	2619
4	66600492	68059497	7586	3739	1901
4	87534648	89238028	9131	4779	2405
4	80990297	82125315	5969	2736	1504
4	138541971	139556511	5669	3024	1526
4	94233299	96182188	10449	5795	2773
4	24135529	25609322	8330	5116	2839
4	126480886	127275477	4612	2586	1321
4	125210862	126480886	7321	3661	1881
4	62371763	64341001	11414	5637	2794
4	27343722	27965868	3969	2126	1128
4	127830293	128996665	4800	2390	1176
4	127275477	127830293	3459	1887	900
4	25609322	27343722	8423	5540	3086
4	124286481	125210862	4738	2393	1292
4	22319347	24135529	9856	5607	2914
4	27965868	29762208	10770	5315	2557
4	64341001	66600492	13257	6166	2918
4	122657987	124286481	7926	3637	1806
4	20544557	22319347	10722	5826	2922
4	33172766	35151415	10021	4163	2147
4	77130707	79093979	10292	5422	2817
4	105305294	107501305	10779	5209	2630
4	53877433	55429556	7796	4417	2312
4	113870102	115666246	9927	5260	2703
4	7539692	8152235	5109	3691	2010
4	15927009	17383322	8198	5212	2723
4	189693511	191043594	9690	5926	3121
4	5502388	6773043	9301	6868	3761
4	99424067	100678360	7069	3352	1787
4	58935008	60741087	11393	5330	2508
4	118479918	119933512	7438	3545	1704
4	97540703	99424067	10218	3869	1819
4	120392684	122657987	13457	6336	3136
4	180122043	182066807	13491	8266	4084
4	157485097	158743718	6694	3430	1768
4	9326479	10699152	11562	5738	2363
4	152782184	154477641	8903	5231	2852
4	167018858	167852917	5182	2385	1250
4	18841874	20544557	9536	4549	2261
4	164478234	165823448	8622	4702	2293
4	56547644	58935008	14319	7953	4012
4	170776510	172558635	10911	4679	2220
4	146178187	148521873	10876	5899	3104
4	163243679	164478234	6945	3515	1895
4	169676825	170776510	5334	2975	1635
4	172558635	174264132	8313	4290	2304
4	119933512	120392684	3121	1462	693
4	165823448	167018858	7452	3986	2078
4	143443265	146178187	12569	5986	2881
4	4684116	5502388	6148	3853	2017
4	154477641	155056126	3242	1980	1092
4	161058864	161826435	5154	2818	1326
4	111256567	113870102	12149	6607	3298
4	148521873	150683580	9523	5228	2737
4	178991910	180122043	7286	3823	2019
4	30454535	31782981	8074	4254	2184
4	10699152	12323034	11190	6443	3093
4	158743718	161058864	11349	5913	2877
4	17383322	18841874	8110	4003	2050
4	47411896	48123600	3292	1826	999
4	14272001	15147446	5560	3226	1646
4	155056126	157485097	13477	7442	3773
4	42213058	43965045	10217	4800	2308
4	186909090	188472981	10457	6854	3633
4	182066807	183371275	9013	6250	3253
4	188472981	189693511	9919	6215	3232
4	161826435	163243679	9560	4467	2196
4	184929455	186909090	13069	9068	4775
4	45189157	47411896	10271	5192	2630
4	2842979	3846040	6817	4549	2372
4	40202609	42213058	11219	6809	3657
4	174264132	176570716	13366	7216	3840
4	100678360	103221356	13366	7028	3402
4	3846040	4684116	7315	4861	2431
4	96182188	97540703	7906	4017	2021
4	29762208	30454535	4786	2243	1252
4	150683580	152782184	9288	4608	2244
4	6773043	7539692	5997	4435	2433
4	43965045	45189157	7182	3159	1606
4	48123600	53877433	12549	7165	3800
4	8152235	9326479	8969	5543	2977
4	176570716	178991910	14608	8022	4138
4	108815348	111256567	12916	6774	3560
4	10240	694715	3421	1781	923
4	103221356	105305294	10138	5096	2522
4	36020436	37255047	7320	3486	1729
4	86930609	87534648	2888	1260	718
4	183371275	184929455	10358	6894	3758
4	55429556	56547644	6471	3399	1834
4	37255047	38907022	10200	6100	3119
4	31782981	33172766	9618	4243	2121
4	15147446	15927009	3881	2215	1169
4	167852917	169676825	10798	5578	2750
4	141084631	143443265	11126	6079	3180
4	35151415	36020436	5930	2619	1353
4	38907022	40202609	6761	3847	1941
4	1478711	2842979	7851	5015	2558
4	107501305	108815348	6163	3164	1770
4	71049152	72140558	5877	2671	1465
4	694715	1478711	5126	3030	1517
4	82125315	83372593	6659	3694	1946
4	91560677	94233299	13718	6616	3101
4	117276929	118479918	7244	3281	1616
4	60741087	62371763	10341	4671	2430
4	115666246	117276929	9594	3639	1803
4	12323034	14272001	12071	6773	3296
5	22152073	23494324	7320	3662	1900
5	162743908	163771582	5477	3333	1702
5	29714820	31390249	10128	4917	2474
5	23494324	26184851	15128	7393	3646
5	180559933	180885156	1301	818	476
5	169505664	171074292	8217	5204	2939
5	33500180	35048970	8230	4435	2351
5	26184851	26857604	4016	1969	1082
5	173642871	175450595	10293	7005	3963
5	158825698	159973944	6293	3784	2113
5	156628700	158825698	10894	5890	2963
5	16963613	18051592	5957	3458	1989
5	85767290	87389991	7163	3666	1875
5	14757804	16963613	11116	6524	3403
5	13464832	14757804	6601	4019	2153
5	87389991	88891530	5812	2812	1549
5	148662624	150561298	9945	6103	3326
5	150561298	152867774	12126	6109	2982
5	35048970	36433954	7160	3562	1841
5	177251507	178413464	8063	5319	2790
5	161482133	162743908	6454	3660	1933
5	159973944	161482133	7880	3903	2047
5	125785649	127344604	8426	4233	2240
5	115831047	117346213	10093	5808	2903
5	168525318	169505664	5412	3214	1778
5	122556905	123798100	6216	3777	1849
5	144943354	147181998	10805	5983	3252
5	127344604	129519025	11297	5140	2440
5	171074292	172678327	8601	5600	3150
5	134777401	136376050	8181	4178	2154
5	178413464	179401244	6187	4185	2360
5	136376050	139265072	11546	6135	3106
5	19917716	22152073	11846	5709	2879
5	119669042	120452166	4976	2523	1168
5	9718832	11173271	8599	5527	2988
5	117346213	118608820	7596	4267	2030
5	132139649	134777401	12295	7542	4016
5	83972689	85767290	11488	5243	2376
5	18051592	19917716	11264	5526	2649
5	120452166	122556905	12467	6534	3127
5	11173271	13464832	12461	6435	2941
5	140645971	142981248	11950	7439	4008
5	8446336	9718832	7934	4388	2362
5	172678327	173642871	5549	3483	1995
5	118608820	119669042	6255	3384	1553
5	142981248	144943354	9564	4738	2245
5	63968304	65911286	9133	4663	2440
5	88891530	90422654	6507	3621	1911
5	31390249	33500180	11779	7220	3908
5	71240456	73759326	11659	6739	3494
5	57340073	58524622	6547	3776	1895
5	75798866	77623332	9613	5831	3071
5	67850860	71240456	7965	4726	2523
5	139265072	140645971	5591	2914	1545
5	95963519	97315601	8470	3540	1819
5	60935907	61672995	3171	1792	1000
5	79393144	80481471	6327	3782	1877
5	123798100	125785649	11942	7266	3468
5	63218987	63968304	3061	1646	868
5	99260992	101578769	12800	5550	2484
5	129519025	132139649	10787	4673	2145
5	77623332	79393144	8818	5371	2857
5	2132442	3361941	9813	6182	3402
5	93809984	95963519	9650	5693	2944
5	5973233	7143218	6921	4169	2270
5	11940	982252	7196	4483	2290
5	65911286	67850860	10307	6184	3191
5	7143218	8446336	8252	4462	2270
5	147181998	148662624	7890	4137	2272
5	4632110	5973233	8433	5071	2861
5	3361941	4632110	7657	4473	2549
5	90422654	91840542	5645	3022	1611
5	91840542	93809984	6647	3723	2070
5	175450595	177251507	8234	4995	2781
5	55417349	56621102	6549	3922	2238
5	38802410	40287729	8446	4041	1967
5	58524622	60935907	10392	5400	2566
5	50163398	52134622	9998	5014	2377
5	36433954	38802410	11423	6278	3242
5	40287729	41888710	7973	3834	1943
5	80481471	82025648	7039	4393	2193
5	53703044	55417349	9669	4782	2417
5	52134622	53703044	8774	4632	2324
5	41888710	43983499	10430	4509	2122
5	103320005	104851483	7849	4308	1943
5	107264196	108633934	8003	4057	1788
5	982252	2132442	9091	6360	3428
5	105893055	107264196	7751	4914	2376
5	108633934	110821144	11832	6394	3062
5	104851483	105893055	4459	2682	1244
5	110821144	111981562	6798	3743	1760
5	43983499	50163398	15994	6651	2865
5	101578769	103320005	8888	4283	2116
5	56621102	57340073	3637	1998	1178
5	111981562	113396285	9421	4907	2185
5	113396285	114830370	8065	4603	2048
5	152867774	153773088	4879	2358	1217
5	165642395	166847740	5677	4010	2085
5	153773088	155373505	8504	4493	2318
5	155373505	156628700	6780	3439	1683
5	179401244	180559933	8047	5013	2736
5	163771582	165642395	9345	6043	2937
5	114830370	115831047	7235	3691	1732
5	82025648	83972689	9033	5312	2863
5	73759326	75798866	10582	5754	2908
5	61672995	63218987	8046	3936	1913
5	97315601	99260992	10465	5036	2376
5	166847740	168525318	8759	6064	3277
5	27984513	29714820	10029	4682	2310
5	26857604	27984513	5236	2987	1606
6	7808936	9020026	7083	3945	1990
6	23936619	24852275	6609	3640	1860
6	50386145	52210476	9751	4604	2274
6	47311898	48391125	5602	2673	1395
6	73924	1452362	8521	5834	3383
6	9020026	10540317	9034	5249	2853
6	68849483	69523448	4293	1991	1066
6	39295677	40345115	6097	3163	1666
6	67329215	68849483	10450	4537	2208
6	65765742	67329215	10726	4643	2129
6	63552888	65765742	12282	5252	2515
6	33236497	35455756	14343	7124	3472
6	53279102	55468270	13279	6132	3011
6	3573593	4617817	6503	4063	2135
6	30798168	31571218	15331	6633	1907
6	32682664	33236497	8113	3397	1279
6	42038721	43756169	8546	4999	2787
6	6785207	7808936	6764	4396	2338
6	28017819	28917608	5440	1979	905
6	5791472	6785207	6689	4383	2423
6	94118142	94441175	1402	705	427
6	26791233	28017819	6820	2812	1251
6	2458936	3573593	7364	4684	2579
6	151912703	153094496	6709	3883	2139
6	137614218	138822629	6912	3927	2209
6	31571218	32682664	22709	14426	3547
6	57599465	61880512	7132	2886	1250
6	123856181	125424383	8154	5283	2826
6	83127149	85209989	9499	4683	2401
6	153094496	154974120	11335	5966	3118
6	28917608	29737971	6575	2363	1001
6	139845436	142288479	10419	5179	2464
6	134244243	136224177	9891	5661	3050
6	146665424	148920352	11848	7332	3727
6	52210476	53279102	5987	3496	1939
6	130935454	132765669	9549	5128	2673
6	4617817	5791472	7132	4387	2392
6	121905676	123856181	9797	4933	2491
6	112345014	114220833	8601	4537	2465
6	127540461	129861031	10458	5553	2946
6	19207487	21684065	13949	8591	4331
6	138822629	139845436	5758	3576	2025
6	24852275	25684587	5831	3134	1597
6	89973052	91843196	9213	5682	3073
6	116131396	117672972	7850	3665	1843
6	148920352	150253404	6905	4001	2080
6	106056733	107450306	7954	4802	2650
6	117672972	118963115	6298	3051	1565
6	55468270	56105313	3711	1713	937
6	150253404	151912703	11001	6944	3662
6	142288479	145319810	14589	8055	4181
6	69523448	71609510	11515	5498	2681
6	88822140	89973052	6307	3432	1847
6	87069500	88822140	9743	4727	2338
6	160580497	162169564	9815	5609	2838
6	162169564	162931203	4963	3203	1642
6	156763326	158218719	7021	4486	2511
6	145319810	146665424	6107	2566	1266
6	91843196	93428644	8534	4386	2246
6	158218719	160580497	13844	7686	3912
6	21684065	22748307	6592	4131	2156
6	102636772	103983395	7775	3559	1726
6	114220833	116131396	10119	4431	2164
6	61880512	63552888	10365	3870	1630
6	129861031	130935454	6545	3647	1947
6	1452362	2458936	5522	3377	1966
6	40345115	42038721	9784	5835	3191
6	73450097	75462003	11966	5633	2815
6	71609510	73450097	10528	4886	2395
6	48391125	50386145	10302	4420	2160
6	93428644	94118142	4262	2139	1195
6	118963115	119963278	5652	2558	1296
6	125424383	127540461	7880	4398	2312
6	103983395	106056733	10898	5893	3023
6	170330173	171051270	4210	2753	1501
6	167024733	168042835	6965	4162	2158
6	85209989	87069500	10383	4456	2144
6	22748307	23936619	8040	4799	2422
6	154974120	156763326	9861	6358	3344
6	80691170	81929222	8382	3101	1391
6	165586864	167024733	8894	5976	3136
6	162931203	164383521	8357	5055	2578
6	169382050	170330173	5606	3120	1624
6	168042835	169382050	10067	6187	3210
6	132765669	134244243	7954	4235	2196
6	17386405	19207487	10796	5542	2673
6	14802924	17386405	14497	8855	4567
6	164383521	165586864	7633	4252	2233
6	110304247	112345014	10091	5103	2602
6	13209388	14802924	8315	5308	2875
6	108464380	110304247	8669	4289	2273
6	11790816	13209388	7532	4568	2475
6	10540317	11790816	7495	4385	2394
6	97093511	97842284	3815	1844	1028
6	107450306	108464380	5157	2935	1650
6	81929222	83127149	6081	3135	1616
6	100630146	102636772	10350	5018	2547
6	119963278	120512128	3251	1449	749
6	136224177	137614218	5989	3554	2063
6	75462003	77414881	9675	4565	2401
6	77414881	78957728	9105	3942	1810
6	78957728	80691170	9270	4511	2264
6	120512128	121905676	8407	3570	1650
6	97842284	100630146	12686	6814	3523
6	94441175	97093511	13499	6180	3167
6	37572596	39295677	10115	5575	2863
6	45406563	47311898	9572	5524	3065
6	25684587	26791233	6823	2952	1406
6	56105313	57599465	7363	4059	2197
6	35455756	37572596	12352	7086	3691
6	43756169	45406563	9191	5324	2758
6	29737971	30798168	15190	5152	1630
7	45952922	46986720	6280	3116	1654
7	63307359	63641125	1986	897	510
7	68234074	69085364	5014	2917	1620
7	15143657	16902069	11096	7021	3274
7	46986720	49212278	13256	6945	3570
7	154964730	156065250	8188	5475	3159
7	31137289	33555768	14450	7822	3664
7	153674019	154964730	8359	5686	3109
7	152249806	153674019	10028	6260	3415
7	49212278	51675322	12998	6813	3450
7	54222976	55691584	9466	4566	2284
7	44763828	45952922	6619	3740	1992
7	28360309	31137289	14946	9668	4992
7	63641125	65689809	11603	5147	2269
7	157634597	159128575	10803	6669	3422
7	25909555	28360309	12307	6935	3434
7	156065250	157634597	10965	6643	3390
7	51675322	53176312	11240	5119	2467
7	144968289	146427960	8662	4202	2080
7	57382638	63307359	14195	7354	3091
7	124156805	124167552	64	48	33
7	139933177	140235210	1937	1285	792
7	121045273	121933630	4533	2312	1278
7	112618684	113712387	5429	2610	1367
7	100196651	101199253	6261	3707	1996
7	150711505	152249806	7951	5513	3192
7	128778386	130422414	7669	4622	2457
7	138744679	139933177	5702	3502	2022
7	104159525	105682905	7726	4703	2487
7	140235210	141226557	4169	2391	1365
7	134307596	135591083	6838	3687	1942
7	79888069	82022686	10987	6517	3431
7	118351581	121045273	11800	5191	2549
7	107780178	109647594	9905	5191	2466
7	142656310	144968289	9100	5176	2875
7	105682905	107780178	10669	6513	3350
7	130422414	132805848	12229	7898	4269
7	65689809	68234074	17597	8586	4023
7	87825004	90661784	15151	7474	3383
7	126519170	126869221	1547	915	533
7	116780178	118351581	6855	3315	1684
7	76458564	78093859	8958	5399	2636
7	101199253	103197510	8610	5102	2638
7	124167552	126519170	13406	6050	2745
7	136876562	138744679	10122	6785	3637
7	121933630	124156805	11213	5515	2714
7	126869221	128778386	9408	5048	2564
7	43159074	44763828	7723	4495	2355
7	42001811	43159074	6465	3376	1876
7	39862670	42001811	10154	5461	2965
7	33555768	36213538	14687	8041	4048
7	71874885	73334602	5501	3370	1874
7	141226557	142656310	6979	3784	2134
7	78093859	79888069	9438	5199	2719
7	73334602	76458564	12159	7707	4072
7	132805848	134307596	6949	3526	1689
7	36213538	37555184	7419	4809	2605
7	2062398	2772227	5291	3631	1910
7	16161	972752	8371	5765	3134
7	6573857	7808752	9806	5955	2858
7	5854526	6573857	4818	3105	1592
7	93966601	96073508	9345	5178	2621
7	85572182	87825004	10015	4740	2339
7	1353067	2062398	5118	3434	1737
7	96073508	97099570	4837	2757	1524
7	90661784	92493752	6780	4016	2179
7	9123423	9987499	6564	4120	1951
7	97099570	98715474	9478	5131	2696
7	82022686	83801203	9624	5303	2652
7	53176312	54222976	7442	3300	1532
7	16902069	19481547	14454	9584	4715
7	4573428	5416232	6702	4531	2322
7	38966703	39862670	4425	2400	1257
7	5416232	5854526	3285	2118	1165
7	972752	1353067	3593	2217	1165
7	2772227	4573428	14604	9308	4253
7	25077259	25909555	4983	2987	1638
7	109647594	112618684	13753	8286	3924
7	23471442	25077259	9153	5403	2537
7	13884202	15143657	8453	5479	2733
[truncated: 880 more rows]

## Sheet: ST3f
Supplementary Table 3f: Effective number of variants within LD Blocks in EUR population with MAF greater than or equal to 0.0001.
[truncated: 1,704 more rows]

[truncated: 12 more sheets: ST4a, ST4b, ST4c, ST4d, ST4e, ST4f, ST5a, ST5b, ST5c, ST5d, ST5e, ST5f]
